# Supplementary material for: Pan-cancer structurome reveals overrepresentation of beta sandwiches and underrepresentation of alpha helical domains
Source: Sci Rep. 2023 Jul 25;13:11988. doi: 10.1038/s41598-023-39273-5 (PMC10368619; doi:10.1038/s41598-023-39273-5)
Supplement: Supplementary file 2 — Supplementary Table 3. [file 41598_2023_39273_MOESM2_ESM.xlsx]

## Sheet: Sheet0
SI Table 3. Transmembrane and intramembrane regions in the overexpressed protein-coding genes set
UniProt ID	Protein names	Gene Names	Length	AlphaFoldDB	Experimental 3D structure	Transmembrane regions	Intramembrane regions	Surfaceome
A0AV02	Solute carrier family 12 member 8 (Cation-chloride cotransporter 9)	SLC12A8 CCC9	714	A0AV02;	n/a	Yes	No	Yes
A1A5B4	Anoctamin-9 (Transmembrane protein 16J) (Tumor protein p53-inducible protein 5) (p53-induced gene 5 protein)	ANO9 PIG5 TMEM16J TP53I5	782	A1A5B4;	n/a	Yes	No	Yes
A6NKB5	Pecanex-like protein 2 (Pecanex homolog protein 2)	PCNX2 KIAA0435 PCNXL2	2137	A6NKB5;	n/a	Yes	No	Yes
O00180	Potassium channel subfamily K member 1 (Inward rectifying potassium channel protein TWIK-1) (Potassium channel K2P1) (Potassium channel KCNO1)	KCNK1 HOHO1 KCNO1 TWIK1	336	O00180;	3UKM;	Yes	Yes	Yes
O00220	Tumor necrosis factor receptor superfamily member 10A (Death receptor 4) (TNF-related apoptosis-inducing ligand receptor 1) (TRAIL receptor 1) (TRAIL-R1) (CD antigen CD261)	TNFRSF10A APO2 DR4 TRAILR1	468	O00220;	5CIR;	Yes	No	Yes
O00222	Metabotropic glutamate receptor 8 (mGluR8)	GRM8 GPRC1H MGLUR8	908	O00222;	6BSZ;6BT5;6E5V;	Yes	No	Yes
O00254	Proteinase-activated receptor 3 (PAR-3) (Coagulation factor II receptor-like 2) (Thrombin receptor-like 2)	F2RL2 PAR3	374	O00254;	n/a	Yes	No	Yes
O00337	Sodium/nucleoside cotransporter 1 (Concentrative nucleoside transporter 1) (CNT 1) (hCNT1) (Na(+)/nucleoside cotransporter 1) (Sodium-coupled nucleoside transporter 1) (Solute carrier family 28 member 1)	SLC28A1 CNT1	649	O00337;	n/a	Yes	No	Yes
O00398	Putative P2Y purinoceptor 10 (P2Y10) (P2Y-like receptor)	P2RY10	339	O00398;	n/a	Yes	No	Yes
O00421	C-C chemokine receptor-like 2 (Chemokine receptor CCR11) (Chemokine receptor X) (Putative MCP-1 chemokine receptor)	CCRL2 CCR11 CCR6 CKRX CRAM HCR	344	O00421;	n/a	Yes	No	Yes
O00476	Sodium-dependent phosphate transport protein 4 (Na(+)/PI cotransporter 4) (NPT4) (Sodium/phosphate cotransporter 4) (Solute carrier family 17 member 3)	SLC17A3 NPT4	420	O00476;	n/a	Yes	No	Yes
O00574	C-X-C chemokine receptor type 6 (CXC-R6) (CXCR-6) (CDw186) (G-protein coupled receptor STRL33) (G-protein coupled receptor bonzo) (CD antigen CD186)	CXCR6 BONZO STRL33 TYMSTR	342	O00574;	n/a	Yes	No	Yes
O00591	Gamma-aminobutyric acid receptor subunit pi (GABA(A) receptor subunit pi)	GABRP	440	O00591;	n/a	Yes	No	Yes
O14493	Claudin-4 (Clostridium perfringens enterotoxin receptor) (CPE-R) (CPE-receptor) (Williams-Beuren syndrome chromosomal region 8 protein)	CLDN4 CPER CPETR1 WBSCR8	209	O14493;	5B2G;7KP4;7TDM;7TDN;	Yes	No	Yes
O14626	G-protein coupled receptor 171 (G-protein coupled receptor H963)	GPR171 H963	319	O14626;	n/a	Yes	No	Yes
O14649	Potassium channel subfamily K member 3 (Acid-sensitive potassium channel protein TASK-1) (TWIK-related acid-sensitive K(+) channel 1) (Two pore potassium channel KT3.1) (Two pore K(+) channel KT3.1)	KCNK3 TASK TASK1	394	O14649;	6RV2;6RV3;6RV4;	Yes	Yes	Yes
O14764	Gamma-aminobutyric acid receptor subunit delta (GABA(A) receptor subunit delta)	GABRD	452	O14764;	7QN5;7QN6;7QN7;7QN8;7QN9;7QNC;7QND;	Yes	No	Yes
O15321	Transmembrane 9 superfamily member 1 (MP70 protein family member) (hMP70)	TM9SF1	606	O15321;	n/a	Yes	No	Yes
O15374	Monocarboxylate transporter 5 (MCT 5) (Monocarboxylate transporter 4) (MCT 4) (Solute carrier family 16 member 4)	SLC16A4 MCT4 MCT5	487	O15374;	n/a	Yes	No	Yes
O15375	Monocarboxylate transporter 6 (MCT 6) (Monocarboxylate transporter 5) (MCT 5) (Solute carrier family 16 member 5)	SLC16A5 MCT5 MCT6	505	O15375;	n/a	Yes	No	Yes
O15399	Glutamate receptor ionotropic, NMDA 2D (GluN2D) (EB11) (Glutamate [NMDA] receptor subunit epsilon-4) (N-methyl D-aspartate receptor subtype 2D) (NMDAR2D) (NR2D)	GRIN2D GluN2D NMDAR2D	1336	O15399;	n/a	Yes	Yes	Yes
O15427	Monocarboxylate transporter 4 (MCT 4) (Solute carrier family 16 member 3)	SLC16A3 MCT3 MCT4	465	O15427;	n/a	Yes	No	Yes
O15432	Probable low affinity copper uptake protein 2 (Copper transporter 2) (hCTR2) (Solute carrier family 31 member 2)	SLC31A2 COPT2 CTR2	143	O15432;	n/a	Yes	No	Yes
O15438	ATP-binding cassette sub-family C member 3 (EC 7.6.2.-) (EC 7.6.2.2) (EC 7.6.2.3) (Canalicular multispecific organic anion transporter 2) (Multi-specific organic anion transporter D) (MOAT-D) (Multidrug resistance-associated protein 3)	ABCC3 CMOAT2 MLP2 MRP3	1527	O15438;	n/a	Yes	No	Yes
O15439	ATP-binding cassette sub-family C member 4 (EC 7.6.2.-) (EC 7.6.2.2) (EC 7.6.2.3) (MRP/cMOAT-related ABC transporter) (Multi-specific organic anion transporter B) (MOAT-B) (Multidrug resistance-associated protein 4)	ABCC4 MOATB MRP4	1325	O15439;	n/a	Yes	No	Yes
O15440	ATP-binding cassette sub-family C member 5 (EC 7.6.2.-) (EC 7.6.2.2) (Multi-specific organic anion transporter C) (MOAT-C) (Multidrug resistance-associated protein 5) (SMRP) (pABC11)	ABCC5 MRP5	1437	O15440;	n/a	Yes	No	Yes
O15551	Claudin-3 (Clostridium perfringens enterotoxin receptor 2) (CPE-R 2) (CPE-receptor 2) (Rat ventral prostate.1 protein homolog) (hRVP1)	CLDN3 C7orf1 CPETR2	220	O15551;	n/a	Yes	No	Yes
O15554	Intermediate conductance calcium-activated potassium channel protein 4 (SK4) (SKCa 4) (SKCa4) (IKCa1) (IK1) (KCa3.1) (KCa4) (Putative Gardos channel)	KCNN4 IK1 IKCA1 KCA4 SK4	427	O15554;	6CNM;6CNN;6CNO;6D42;	Yes	Yes	Yes
O43194	G-protein coupled receptor 39	GPR39	453	O43194;	n/a	Yes	No	Yes
O43520	Phospholipid-transporting ATPase IC (EC 7.6.2.1) (ATPase class I type 8B member 1) (Familial intrahepatic cholestasis type 1) (P4-ATPase flippase complex alpha subunit ATP8B1)	ATP8B1 ATPIC FIC1 PFIC	1251	O43520;	7PY4;7VGH;7VGI;7VGJ;	Yes	No	Yes
O43752	Syntaxin-6	STX6	255	O43752;	2NPS;4J2C;	Yes	No	Yes
O60312	Phospholipid-transporting ATPase VA (EC 7.6.2.1) (ATPase class V type 10A) (Aminophospholipid translocase VA) (P4-ATPase flippase complex alpha subunit ATP10A)	ATP10A ATP10C ATPVA ATPVC KIAA0566	1499	O60312;	n/a	Yes	No	Yes
O60478	Integral membrane protein GPR137B (Transmembrane 7 superfamily member 1 protein)	GPR137B TM7SF1	399	O60478;	n/a	Yes	No	Yes
O60486	Plexin-C1 (Virus-encoded semaphorin protein receptor) (CD antigen CD232)	PLXNC1 VESPR	1568	O60486;	3KUZ;3NVN;3NVQ;6VXK;	Yes	No	Yes
O60669	Monocarboxylate transporter 2 (MCT 2) (Solute carrier family 16 member 7)	SLC16A7 MCT2	478	O60669;	7BP3;	Yes	No	Yes
O60895	Receptor activity-modifying protein 2 (Calcitonin-receptor-like receptor activity-modifying protein 2) (CRLR activity-modifying protein 2)	RAMP2	175	O60895;	2XVT;3AQE;3AQF;4RWF;6UUN;6V2E;7TYH;7TYX;7TYY;	Yes	No	Yes
O75084	Frizzled-7 (Fz-7) (hFz7) (FzE3)	FZD7	574	O75084;	4Z33;5T44;5URV;5WBS;6NE2;6NE4;6O3A;6O3B;7EVW;	Yes	No	Yes
O75185	Calcium-transporting ATPase type 2C member 2 (ATPase 2C2) (EC 7.2.2.10) (Ca(2+)/Mn(2+)-ATPase 2C2) (Secretory pathway Ca(2+)-transporting ATPase type 2) (SPCA2)	ATP2C2 KIAA0703 SPCA2	946	O75185;	n/a	Yes	No	Yes
O75387	Large neutral amino acids transporter small subunit 3 (L-type amino acid transporter 3) (Prostate cancer overexpressed gene 1 protein) (Solute carrier family 43 member 1)	SLC43A1 LAT3 PB39 POV1	559	O75387;	n/a	Yes	No	Yes
O75473	Leucine-rich repeat-containing G-protein coupled receptor 5 (G-protein coupled receptor 49) (G-protein coupled receptor 67) (G-protein coupled receptor HG38)	LGR5 GPR49 GPR67	907	O75473;	4BSR;4BSS;4BST;4BSU;4KNG;4UFR;4UFS;	Yes	No	Yes
O75508	Claudin-11 (Oligodendrocyte-specific protein)	CLDN11 OSP OTM	207	O75508;	n/a	Yes	No	Yes
O75509	Tumor necrosis factor receptor superfamily member 21 (Death receptor 6) (CD antigen CD358)	TNFRSF21 DR6 UNQ437/PRO868	655	O75509;	2DBH;3QO4;3U3P;3U3Q;3U3S;3U3T;3U3V;	Yes	No	Yes
O75712	Gap junction beta-3 protein (Connexin-31) (Cx31)	GJB3 CX31	270	O75712;	n/a	Yes	No	Yes
O75751	Solute carrier family 22 member 3 (Extraneuronal monoamine transporter) (EMT) (Organic cation transporter 3)	SLC22A3 EMTH OCT3	556	O75751;	n/a	Yes	No	Yes
O75899	Gamma-aminobutyric acid type B receptor subunit 2 (GABA-B receptor 2) (GABA-B-R2) (GABA-BR2) (GABABR2) (Gb2) (G-protein coupled receptor 51) (HG20)	GABBR2 GPR51 GPRC3B	941	O75899;	4F11;4F12;4MQE;4MQF;4MR7;4MR8;4MR9;4MRM;4MS1;4MS3;4MS4;4PAS;6M8R;6OCP;6UO8;6UO9;6UOA;6VJM;6W2X;6WIV;7C7Q;7C7S;7CA3;7CA5;7CUM;7EB2;	Yes	No	Yes
O75923	Dysferlin (Dystrophy-associated fer-1-like protein) (Fer-1-like protein 1)	DYSF FER1L1	2080	O75923;	4CAH;4CAI;4IHB;4IQH;7JOF;7K6B;7KRB;	Yes	No	Yes
O94759	Transient receptor potential cation channel subfamily M member 2 (Estrogen-responsive element-associated gene 1 protein) (Long transient receptor potential channel 2) (LTrpC-2) (LTrpC2) (Transient receptor potential channel 7) (TrpC7) (Transient receptor potential melastatin 2)	TRPM2 EREG1 KNP3 LTRPC2 TRPC7	1503	O94759;	6MIX;6MIZ;6MJ2;6PUO;6PUR;6PUS;6PUU;7VQ1;7VQ2;	Yes	Yes	Yes
O95255	ATP-binding cassette sub-family C member 6 (EC 7.6.2.-) (EC 7.6.2.3) (Anthracycline resistance-associated protein) (Multi-specific organic anion transporter E) (MOAT-E) (Multidrug resistance-associated protein 6)	ABCC6 ARA MRP6	1503	O95255;	6BZR;6BZS;6NLO;6P7F;	Yes	No	Yes
O95377	Gap junction beta-5 protein (Connexin-31.1) (Cx31.1)	GJB5	273	O95377;	n/a	Yes	No	Yes
O95436	Sodium-dependent phosphate transport protein 2B (Sodium-phosphate transport protein 2B) (Na(+)-dependent phosphate cotransporter 2B) (NaPi3b) (Sodium/phosphate cotransporter 2B) (Na(+)/Pi cotransporter 2B) (NaPi-2b) (Solute carrier family 34 member 2)	SLC34A2	690	O95436;	n/a	Yes	No	Yes
O95452	Gap junction beta-6 protein (Connexin-30) (Cx30)	GJB6	261	O95452;	n/a	Yes	No	Yes
O95471	Claudin-7 (CLDN-7)	CLDN7 CEPTRL2 CPETRL2	211	O95471;	n/a	Yes	No	Yes
O95477	Phospholipid-transporting ATPase ABCA1 (EC 7.6.2.1) (ATP-binding cassette sub-family A member 1) (ATP-binding cassette transporter 1) (ABC-1) (ATP-binding cassette 1) (Cholesterol efflux regulatory protein)	ABCA1 ABC1 CERP	2261	O95477;	5XJY;7ROQ;	Yes	No	Yes
O95484	Claudin-9	CLDN9	217	O95484;	6OV2;6OV3;	Yes	No	Yes
O95528	Solute carrier family 2, facilitated glucose transporter member 10 (Glucose transporter type 10) (GLUT-10)	SLC2A10 GLUT10	541	O95528;	n/a	Yes	No	Yes
O95832	Claudin-1 (Senescence-associated epithelial membrane protein)	CLDN1 CLD1 SEMP1 UNQ481/PRO944	211	O95832;	n/a	Yes	No	Yes
O95977	Sphingosine 1-phosphate receptor 4 (S1P receptor 4) (S1P4) (Endothelial differentiation G-protein coupled receptor 6) (Sphingosine 1-phosphate receptor Edg-6) (S1P receptor Edg-6)	S1PR4 EDG6	384	O95977;	2DCO;	Yes	No	Yes
P04233	HLA class II histocompatibility antigen gamma chain (HLA-DR antigens-associated invariant chain) (Ia antigen-associated invariant chain) (Ii) (CD antigen CD74) [Cleaved into: Class-II-associated invariant chain peptide (CLIP)]	CD74 DHLAG	296	P04233;	1A6A;1ICF;1IIE;1L3H;1MUJ;3PDO;3PGC;3PGD;3QXA;3QXD;4AEN;4AH2;4X5W;5KSU;5KSV;	Yes	No	Yes
P04839	Cytochrome b-245 heavy chain (EC 1.-.-.-) (CGD91-phox) (Cytochrome b(558) subunit beta) (Cytochrome b558 subunit beta) (Heme-binding membrane glycoprotein gp91phox) (NADPH oxidase 2) (Neutrophil cytochrome b 91 kDa polypeptide) (Superoxide-generating NADPH oxidase heavy chain subunit) (gp91-1) (gp91-phox) (p22 phagocyte B-cytochrome)	CYBB NOX2	570	P04839;	3A1F;	Yes	No	Yes
P04920	Anion exchange protein 2 (AE 2) (Anion exchanger 2) (Non-erythroid band 3-like protein) (BND3L) (Solute carrier family 4 member 2)	SLC4A2 AE2 EPB3L1 HKB3 MPB3L	1241	P04920;	n/a	Yes	No	Yes
P05067	Amyloid-beta precursor protein (APP) (ABPP) (APPI) (Alzheimer disease amyloid A4 protein homolog) (Alzheimer disease amyloid protein) (Amyloid precursor protein) (Amyloid-beta (A4) precursor protein) (Amyloid-beta A4 protein) (Cerebral vascular amyloid peptide) (CVAP) (PreA4) (Protease nexin-II) (PN-II) [Cleaved into: N-APP; Soluble APP-alpha (S-APP-alpha); Soluble APP-beta (S-APP-beta); C99 (Bet…	APP A4 AD1	770	P05067;	1AAP;1AMB;1AMC;1AML;1BA4;1BA6;1BJB;1BJC;1BRC;1CA0;1HZ3;1IYT;1MWP;1OWT;1QCM;1QWP;1QXC;1QYT;1TAW;1TKN;1X11;1Z0Q;1ZE7;1ZE9;1ZJD;2BEG;2BP4;2FJZ;2FK1;2FK2;2FK3;2FKL;2FMA;2G47;2IPU;2LFM;2LLM;2LMN;2LMO;2LMP;2LMQ;2LNQ;2LOH;2LP1;2LZ3;2LZ4;2M4J;2M9R;2M9S;2MGT;2MJ1;2MPZ;2MVX;2MXU;2NAO;2OTK;2R0W;2WK3;2Y29;2Y2A;2Y3J;2Y3K;2Y3L;3AYU;3BAE;3BKJ;3DXC;3DXD;3DXE;3GCI;3IFL;3IFN;3IFO;3IFP;3JQ5;3JQL;3JTI;3KTM;3L33;3L81…	Yes	No	Yes
P06734	Low affinity immunoglobulin epsilon Fc receptor (BLAST-2) (C-type lectin domain family 4 member J) (Fc-epsilon-RII) (Immunoglobulin E-binding factor) (Lymphocyte IgE receptor) (CD antigen CD23) [Cleaved into: Low affinity immunoglobulin epsilon Fc receptor membrane-bound form; Low affinity immunoglobulin epsilon Fc receptor soluble form]	FCER2 CD23A CLEC4J FCE2 IGEBF	321	P06734;	1T8C;1T8D;2H2R;2H2T;4EZM;4G96;4G9A;4GI0;4GJ0;4GJX;4GK1;4GKO;4J6J;4J6K;4J6L;4J6M;4J6N;4J6P;4J6Q;4KI1;5LGK;6Y0L;6Y0M;	Yes	No	Yes
P07550	Beta-2 adrenergic receptor (Beta-2 adrenoreceptor) (Beta-2 adrenoceptor)	ADRB2 ADRB2R B2AR	413	P07550;	1GQ4;2R4R;2R4S;2RH1;3D4S;3KJ6;3NY8;3NY9;3NYA;3P0G;3PDS;3SN6;4GBR;4LDE;4LDL;4LDO;4QKX;5D5A;5D5B;5D6L;5JQH;5X7D;6E67;6KR8;6MXT;6N48;6NI3;6OBA;6PRZ;6PS0;6PS1;6PS2;6PS3;6PS4;6PS5;6PS6;7BZ2;7DHI;7DHR;	Yes	No	Yes
P08034	Gap junction beta-1 protein (Connexin-32) (Cx32) (GAP junction 28 kDa liver protein)	GJB1 CX32	283	P08034;	5KK9;	Yes	No	Yes
P08138	Tumor necrosis factor receptor superfamily member 16 (Gp80-LNGFR) (Low affinity neurotrophin receptor p75NTR) (Low-affinity nerve growth factor receptor) (NGF receptor) (p75 ICD) (CD antigen CD271)	NGFR TNFRSF16	427	P08138;	2N80;2N83;2N97;3EWV;5ZGG;7CSQ;	Yes	No	Yes
P09603	Macrophage colony-stimulating factor 1 (CSF-1) (M-CSF) (MCSF) (Lanimostim) [Cleaved into: Processed macrophage colony-stimulating factor 1]	CSF1	554	P09603;	1HMC;3UEZ;3UF2;4ADF;4FA8;4WRL;4WRM;5LXF;	Yes	No	Yes
P0DMS8	Adenosine receptor A3	ADORA3	318	P0DMS8;	n/a	Yes	No	Yes
P11166	Solute carrier family 2, facilitated glucose transporter member 1 (Glucose transporter type 1, erythrocyte/brain) (GLUT-1) (HepG2 glucose transporter)	SLC2A1 GLUT1	492	P11166;	4PYP;5EQG;5EQH;5EQI;6THA;	Yes	No	Yes
P11169	Solute carrier family 2, facilitated glucose transporter member 3 (Glucose transporter type 3, brain) (GLUT-3)	SLC2A3 GLUT3	496	P11169;	4ZW9;4ZWB;4ZWC;5C65;7CRZ;7SPS;7SPT;	Yes	No	Yes
P13569	Cystic fibrosis transmembrane conductance regulator (CFTR) (ATP-binding cassette sub-family C member 7) (Channel conductance-controlling ATPase) (EC 5.6.1.6) (cAMP-dependent chloride channel)	CFTR ABCC7	1480	P13569;	1XMI;1XMJ;2BBO;2BBS;2BBT;2LOB;2PZE;2PZF;2PZG;3GD7;3ISW;4WZ6;5D2D;5D3E;5D3F;5TF7;5TF8;5TFA;5TFB;5TFC;5TFD;5TFF;5TFG;5TFI;5TFJ;5TGK;5UAK;6GJQ;6GJS;6GJU;6GK4;6GKD;6HEP;6MSM;6O1V;6O2P;6UK1;6WBS;6ZE1;7QI1;7SV7;7SVD;7SVR;	Yes	No	Yes
P13866	Sodium/glucose cotransporter 1 (Na(+)/glucose cotransporter 1) (High affinity sodium-glucose cotransporter) (Solute carrier family 5 member 1)	SLC5A1 NAGT SGLT1	664	P13866;	7SL8;7SLA;	Yes	Yes	Yes
P15144	Aminopeptidase N (AP-N) (hAPN) (EC 3.4.11.2) (Alanyl aminopeptidase) (Aminopeptidase M) (AP-M) (Microsomal aminopeptidase) (Myeloid plasma membrane glycoprotein CD13) (gp150) (CD antigen CD13)	ANPEP APN CD13 PEPN	967	P15144;	4FYQ;4FYR;4FYS;4FYT;5LHD;6ATK;6U7E;6U7F;6U7G;6XWD;7AEW;7VPQ;	Yes	No	Yes
P17302	Gap junction alpha-1 protein (Connexin-43) (Cx43) (Gap junction 43 kDa heart protein)	GJA1 GJAL	382	P17302;	2LL2;7F92;7F93;7F94;	Yes	No	Yes
P18825	Alpha-2C adrenergic receptor (Alpha-2 adrenergic receptor subtype C4) (Alpha-2C adrenoreceptor) (Alpha-2C adrenoceptor) (Alpha-2CAR)	ADRA2C ADRA2L2 ADRA2RL2	462	P18825;	6KUW;	Yes	No	Yes
P19438	Tumor necrosis factor receptor superfamily member 1A (Tumor necrosis factor receptor 1) (TNF-R1) (Tumor necrosis factor receptor type I) (TNF-RI) (TNFR-I) (p55) (p60) (CD antigen CD120a) [Cleaved into: Tumor necrosis factor receptor superfamily member 1A, membrane form; Tumor necrosis factor-binding protein 1 (TBPI)]	TNFRSF1A TNFAR TNFR1	455	P19438;	1EXT;1FT4;1ICH;1NCF;1TNR;7K7A;7KP7;7KP8;7KPB;	Yes	No	Yes
P19634	Sodium/hydrogen exchanger 1 (APNH) (Na(+)/H(+) antiporter, amiloride-sensitive) (Na(+)/H(+) exchanger 1) (NHE-1) (Solute carrier family 9 member 1)	SLC9A1 APNH1 NHE1	815	P19634;	1Y4E;2BEC;2E30;2HTG;2KBV;2L0E;2MDF;2YGG;6BJF;6NUC;6NUF;6NUU;6ZBI;7DSV;7DSW;7DSX;	Yes	Yes	Yes
P20701	Integrin alpha-L (CD11 antigen-like family member A) (Leukocyte adhesion glycoprotein LFA-1 alpha chain) (LFA-1A) (Leukocyte function-associated molecule 1 alpha chain) (CD antigen CD11a)	ITGAL CD11A	1170	P20701;	1CQP;1DGQ;1LFA;1MJN;1MQ8;1MQ9;1MQA;1RD4;1T0P;1XDD;1XDG;1XUO;1ZON;1ZOO;1ZOP;2ICA;2K8O;2M3E;2O7N;3BN3;3BQM;3BQN;3E2M;3EOA;3EOB;3F74;3F78;3HI6;3M6F;3TCX;4IXD;5E6R;5E6S;5E6U;6BXB;6BXF;6BXJ;6CKB;7KC3;7KC5;7KC6;	Yes	No	Yes
P20963	T-cell surface glycoprotein CD3 zeta chain (T-cell receptor T3 zeta chain) (CD antigen CD247)	CD247 CD3Z T3Z TCRZ	164	P20963;	1TCE;1YGR;2HAC;2OQ1;3IK5;3IOZ;4XZ1;6JXR;7FJD;7FJE;7FJF;7PHR;	Yes	No	Yes
P21462	fMet-Leu-Phe receptor (fMLP receptor) (N-formyl peptide receptor) (FPR) (N-formylpeptide chemoattractant receptor)	FPR1	350	P21462;	7EUO;7T6T;7WVU;	Yes	No	Yes
P21583	Kit ligand (Mast cell growth factor) (MGF) (Stem cell factor) (SCF) (c-Kit ligand) [Cleaved into: Soluble KIT ligand (sKITLG)]	KITLG MGF SCF	273	P21583;	1EXZ;1SCF;2E9W;	Yes	No	Yes
P21709	Ephrin type-A receptor 1 (hEpha1) (EC 2.7.10.1) (EPH tyrosine kinase) (EPH tyrosine kinase 1) (Erythropoietin-producing hepatoma receptor) (Tyrosine-protein kinase receptor EPH)	EPHA1 EPH EPHT EPHT1	976	P21709;	2K1K;2K1L;3HIL;3KKA;	Yes	No	Yes
P21730	C5a anaphylatoxin chemotactic receptor 1 (C5a anaphylatoxin chemotactic receptor) (C5a-R) (C5aR) (CD antigen CD88)	C5AR1 C5AR C5R1	350	P21730;	5O9H;6C1Q;6C1R;	Yes	No	Yes
P22001	Potassium voltage-gated channel subfamily A member 3 (HGK5) (HLK3) (HPCN3) (Voltage-gated K(+) channel HuKIII) (Voltage-gated potassium channel subunit Kv1.3)	KCNA3 HGK5	575	P22001;	4BGC;7EJ1;7EJ2;7SSV;7SSX;7SSY;7SSZ;8DFL;	Yes	No	Yes
P22732	Solute carrier family 2, facilitated glucose transporter member 5 (Fructose transporter) (Glucose transporter type 5, small intestine) (GLUT-5)	SLC2A5 GLUT5	501	P22732;	n/a	Yes	No	Yes
P23634	Plasma membrane calcium-transporting ATPase 4 (PMCA4) (EC 7.2.2.10) (Matrix-remodeling-associated protein 1) (Plasma membrane calcium ATPase isoform 4) (Plasma membrane calcium pump isoform 4)	ATP2B4 ATP2B2 MXRA1	1241	P23634;	1CFF;2KNE;	Yes	No	Yes
P23975	Sodium-dependent noradrenaline transporter (Norepinephrine transporter) (NET) (Solute carrier family 6 member 2)	SLC6A2 NAT1 NET1 SLC6A5	617	P23975;	n/a	Yes	No	Yes
P24530	Endothelin receptor type B (ET-B) (ET-BR) (Endothelin receptor non-selective type)	EDNRB ETRB	442	P24530;	5GLH;5GLI;5X93;5XPR;6IGK;6IGL;6LRY;	Yes	No	Yes
P25021	Histamine H2 receptor (H2R) (HH2R) (Gastric receptor I)	HRH2	359	P25021;	7UL3;	Yes	No	Yes
P25025	C-X-C chemokine receptor type 2 (CXC-R2) (CXCR-2) (CDw128b) (GRO/MGSA receptor) (High affinity interleukin-8 receptor B) (IL-8R B) (IL-8 receptor type 2) (CD antigen CD182)	CXCR2 IL8RB	360	P25025;	4Q3H;5TYT;6KVA;6KVF;6LFM;6LFO;	Yes	No	Yes
P25089	N-formyl peptide receptor 3 (FMLP-related receptor II) (FMLP-R-II) (Formyl peptide receptor-like 2)	FPR3 FPRH1 FPRL2	353	P25089;	n/a	Yes	No	Yes
P25092	Guanylyl cyclase C (GC-C) (EC 4.6.1.2) (Heat-stable enterotoxin receptor) (STA receptor) (hSTAR) (Intestinal guanylate cyclase)	GUCY2C GUC2C STAR	1073	P25092;	n/a	Yes	No	Yes
P25101	Endothelin-1 receptor (Endothelin receptor type A) (ET-A) (ETA-R) (hET-AR)	EDNRA ETA ETRA	427	P25101;	n/a	Yes	No	Yes
P25105	Platelet-activating factor receptor (PAF-R) (PAFr)	PTAFR PAFR	342	P25105;	n/a	Yes	No	Yes
P25106	Atypical chemokine receptor 3 (C-X-C chemokine receptor type 7) (CXC-R7) (CXCR-7) (Chemokine orphan receptor 1) (G-protein coupled receptor 159) (G-protein coupled receptor RDC1 homolog) (RDC-1)	ACKR3 CMKOR1 CXCR7 GPR159 RDC1	362	P25106;	6K3F;7SK3;7SK4;7SK5;7SK6;7SK7;7SK8;7SK9;	Yes	No	Yes
P25116	Proteinase-activated receptor 1 (PAR-1) (Coagulation factor II receptor) (Thrombin receptor)	F2R CF2R PAR1 TR	425	P25116;	1NRN;1NRO;1NRP;1NRQ;1NRR;3BEF;3HKI;3HKJ;3LU9;3VW7;	Yes	No	Yes
P25445	Tumor necrosis factor receptor superfamily member 6 (Apo-1 antigen) (Apoptosis-mediating surface antigen FAS) (FASLG receptor) (CD antigen CD95)	FAS APT1 FAS1 TNFRSF6	335	P25445;	1DDF;2NA7;3EWT;3EZQ;3THM;3TJE;	Yes	No	Yes
P29033	Gap junction beta-2 protein (Connexin-26) (Cx26)	GJB2	226	P29033;	2ZW3;3IZ1;3IZ2;5ER7;5ERA;5KJ3;5KJG;6UVR;6UVS;6UVT;7QEO;7QEQ;7QER;7QES;7QET;7QEU;7QEV;7QEW;	Yes	Yes	Yes
P29317	Ephrin type-A receptor 2 (EC 2.7.10.1) (Epithelial cell kinase) (Tyrosine-protein kinase receptor ECK)	EPHA2 ECK	976	P29317;	1MQB;2E8N;2K9Y;2KSO;2X10;2X11;3C8X;3CZU;3FL7;3HEI;3HPN;3KKA;3MBW;3MX0;3SKJ;4P2K;4PDO;4TRL;5EK7;5I9U;5I9V;5I9W;5I9X;5I9Y;5I9Z;5IA0;5IA1;5IA2;5IA3;5IA4;5IA5;5NJZ;5NK0;5NK1;5NK2;5NK3;5NK4;5NK5;5NK6;5NK7;5NK8;5NK9;5NKA;5NKB;5NKC;5NKD;5NKE;5NKF;5NKG;5NKH;5NKI;5NZ9;6B9L;6F7M;6F7N;6FNF;6FNG;6FNH;6HES;6HET;6HEU;6HEV;6HEW;6HEX;6HEY;6NJZ;6NK0;6NK1;6NK2;6NKP;6Q7B;6Q7C;6Q7D;6Q7E;6Q7F;6Q7G;6RW2;7B7N;7CZE;7CZF…	Yes	No	Yes
P29323	Ephrin type-B receptor 2 (EC 2.7.10.1) (Developmentally-regulated Eph-related tyrosine kinase) (ELK-related tyrosine kinase) (EPH tyrosine kinase 3) (EPH-like kinase 5) (EK5) (hEK5) (Renal carcinoma antigen NY-REN-47) (Tyrosine-protein kinase TYRO5) (Tyrosine-protein kinase receptor EPH-3) [Cleaved into: EphB2/CTF1; EphB2/CTF2]	EPHB2 DRT EPHT3 EPTH3 ERK HEK5 TYRO5	1055	P29323;	1B4F;1F0M;2QBX;3ZFM;	Yes	No	Yes
P29972	Aquaporin-1 (AQP-1) (Aquaporin-CHIP) (Urine water channel) (Water channel protein for red blood cells and kidney proximal tubule)	AQP1 CHIP28	269	P29972;	1FQY;1H6I;1IH5;4CSK;6POJ;7UZE;8CT2;8CTE;	Yes	Yes	Yes
P30273	High affinity immunoglobulin epsilon receptor subunit gamma (Fc receptor gamma-chain) (FcRgamma) (Fc-epsilon RI-gamma) (IgE Fc receptor subunit gamma) (FceRI gamma)	FCER1G	86	P30273;	7Q5T;	Yes	No	Yes
P30518	Vasopressin V2 receptor (V2R) (AVPR V2) (Antidiuretic hormone receptor) (Renal-type arginine vasopressin receptor)	AVPR2 ADHR DIR DIR3 V2R	371	P30518;	4JQI;6NI2;6U1N;7BB6;7BB7;7DF9;7DFA;7DFB;7DFC;7DW9;7KH0;	Yes	No	Yes
P30532	Neuronal acetylcholine receptor subunit alpha-5	CHRNA5 NACHRA5	468	P30532;	n/a	Yes	No	Yes
P30542	Adenosine receptor A1	ADORA1	326	P30542;	5N2S;5UEN;6D9H;7LD3;7LD4;	Yes	No	Yes
P30825	High affinity cationic amino acid transporter 1 (CAT-1) (CAT1) (Ecotropic retroviral leukemia receptor homolog) (Ecotropic retrovirus receptor homolog) (Solute carrier family 7 member 1) (System Y+ basic amino acid transporter)	SLC7A1 ATRC1 ERR REC1L	629	P30825;	n/a	Yes	No	Yes
P31641	Sodium- and chloride-dependent taurine transporter (Solute carrier family 6 member 6)	SLC6A6	620	P31641;	n/a	Yes	No	Yes
P32241	Vasoactive intestinal polypeptide receptor 1 (VIP-R-1) (Pituitary adenylate cyclase-activating polypeptide type II receptor) (PACAP type II receptor) (PACAP-R-2) (PACAP-R2) (VPAC1)	VIPR1	457	P32241;	1OF2;1OGT;3B3I;3B6S;3DTX;3HCV;5DEF;5DEG;5IB1;5IB2;5IB3;5IB4;5IB5;6VN7;7ALO;	Yes	No	Yes
P32246	C-C chemokine receptor type 1 (C-C CKR-1) (CC-CKR-1) (CCR-1) (CCR1) (HM145) (LD78 receptor) (Macrophage inflammatory protein 1-alpha receptor) (MIP-1alpha-R) (RANTES-R) (CD antigen CD191)	CCR1 CMKBR1 CMKR1 SCYAR1	355	P32246;	7VL8;7VL9;7VLA;	Yes	No	Yes
P32248	C-C chemokine receptor type 7 (C-C CKR-7) (CC-CKR-7) (CCR-7) (BLR2) (CDw197) (Epstein-Barr virus-induced G-protein coupled receptor 1) (EBI1) (EBV-induced G-protein coupled receptor 1) (MIP-3 beta receptor) (CD antigen CD197)	CCR7 CMKBR7 EBI1 EVI1	378	P32248;	6QZH;	Yes	No	Yes
P32249	G-protein coupled receptor 183 (Epstein-Barr virus-induced G-protein coupled receptor 2) (EBI2) (EBV-induced G-protein coupled receptor 2) (hEBI2)	GPR183 EBI2	361	P32249;	7TUY;7TUZ;	Yes	No	Yes
P32302	C-X-C chemokine receptor type 5 (CXC-R5) (CXCR-5) (Burkitt lymphoma receptor 1) (Monocyte-derived receptor 15) (MDR-15) (CD antigen CD185)	CXCR5 BLR1 MDR15	372	P32302;	n/a	Yes	No	Yes
P35367	Histamine H1 receptor (H1R) (HH1R)	HRH1	487	P35367;	3RZE;7DFL;	Yes	No	Yes
P35408	Prostaglandin E2 receptor EP4 subtype (PGE receptor EP4 subtype) (PGE2 receptor EP4 subtype) (Prostanoid EP4 receptor)	PTGER4 PTGER2	488	P35408;	5YHL;5YWY;7D7M;	Yes	No	Yes
P35414	Apelin receptor (Angiotensin receptor-like 1) (G-protein coupled receptor APJ) (G-protein coupled receptor HG11)	APLNR AGTRL1 APJ	380	P35414;	2LOT;2LOU;2LOV;2LOW;5VBL;6KNM;7SUS;7W0L;7W0M;7W0N;7W0O;7W0P;	Yes	No	Yes
P36383	Gap junction gamma-1 protein (Connexin-45) (Cx45) (Gap junction alpha-7 protein)	GJC1 GJA7	396	P36383;	3SHW;	Yes	No	Yes
P40126	L-dopachrome tautomerase (DCT) (DT) (EC 5.3.3.12) (L-dopachrome Delta-isomerase) (Tyrosinase-related protein 2) (TRP-2) (TRP2)	DCT TYRP2	519	P40126;	4HX1;	Yes	No	Yes
P41146	Nociceptin receptor (Kappa-type 3 opioid receptor) (KOR-3) (Orphanin FQ receptor)	OPRL1 OOR ORL1	370	P41146;	4EA3;5DHG;5DHH;	Yes	No	Yes
P41231	P2Y purinoceptor 2 (P2Y2) (ATP receptor) (P2U purinoceptor 1) (P2U1) (P2U receptor 1) (Purinergic receptor)	P2RY2 P2RU1	377	P41231;	n/a	Yes	No	Yes
P41440	Reduced folate transporter (FOLT) (Cyclic dinucleotide:anion antiporter SLC19A1) (Folate:anion antiporter SLC19A1) (Intestinal folate carrier 1) (IFC-1) (Placental folate transporter) (Reduced folate carrier protein) (RFC) (hRFC) (Reduced folate transporter 1) (RFT-1) (Solute carrier family 19 member 1) (hSLC19A1)	SLC19A1 FLOT1 RFC1	591	P41440;	n/a	Yes	No	Yes
P41597	C-C chemokine receptor type 2 (C-C CKR-2) (CC-CKR-2) (CCR-2) (CCR2) (Monocyte chemoattractant protein 1 receptor) (MCP-1-R) (CD antigen CD192)	CCR2 CMKBR2	374	P41597;	2MLO;2MLQ;5T1A;7P8X;7XA3;	Yes	No	Yes
P43003	Excitatory amino acid transporter 1 (Sodium-dependent glutamate/aspartate transporter 1) (GLAST-1) (Solute carrier family 1 member 3)	SLC1A3 EAAT1 GLAST GLAST1	542	P43003;	5LLM;5LLU;5LM4;5MJU;7NPW;	Yes	Yes	Yes
P43005	Excitatory amino acid transporter 3 (Excitatory amino-acid carrier 1) (Neuronal and epithelial glutamate transporter) (Sodium-dependent glutamate/aspartate transporter 3) (Solute carrier family 1 member 1)	SLC1A1 EAAC1 EAAT3 HEAAC1	524	P43005;	6S3Q;6X2L;6X2Z;6X3E;6X3F;7NSG;	Yes	Yes	Yes
P43116	Prostaglandin E2 receptor EP2 subtype (PGE receptor EP2 subtype) (PGE2 receptor EP2 subtype) (Prostanoid EP2 receptor)	PTGER2	358	P43116;	7CX2;7CX3;7CX4;	Yes	No	Yes
P43657	Lysophosphatidic acid receptor 6 (LPA receptor 6) (LPA-6) (Oleoyl-L-alpha-lysophosphatidic acid receptor) (P2Y purinoceptor 5) (P2Y5) (Purinergic receptor 5) (RB intron encoded G-protein coupled receptor)	LPAR6 P2RY5	344	P43657;	n/a	Yes	No	Yes
P45844	ATP-binding cassette sub-family G member 1 (EC 7.6.2.-) (ATP-binding cassette transporter 8) (White protein homolog)	ABCG1 ABC8 WHT1	678	P45844;	7FDV;7OZ1;7R8C;7R8D;7R8E;	Yes	No	Yes
P46098	5-hydroxytryptamine receptor 3A (5-HT3-A) (5-HT3A) (5-hydroxytryptamine receptor 3) (5-HT-3) (5-HT3R) (Serotonin receptor 3A) (Serotonin-gated ion channel receptor)	HTR3A 5HT3R HTR3	478	P46098;	n/a	Yes	No	Yes
P46977	Dolichyl-diphosphooligosaccharide--protein glycosyltransferase subunit STT3A (Oligosaccharyl transferase subunit STT3A) (STT3-A) (EC 2.4.99.18) (B5) (Integral membrane protein 1) (Transmembrane protein TMC)	STT3A ITM1 TMC	705	P46977;	6S7O;	Yes	No	Yes
P47870	Gamma-aminobutyric acid receptor subunit beta-2 (GABA(A) receptor subunit beta-2)	GABRB2	512	P47870;	6D6T;6D6U;6X3S;6X3T;6X3U;6X3V;6X3W;6X3X;6X3Z;6X40;7T0W;7T0Z;8DD2;8DD3;	Yes	No	Yes
P48029	Sodium- and chloride-dependent creatine transporter 1 (CT1) (Creatine transporter 1) (Solute carrier family 6 member 8)	SLC6A8	635	P48029;	n/a	Yes	No	Yes
P48067	Sodium- and chloride-dependent glycine transporter 1 (GlyT-1) (GlyT1) (Solute carrier family 6 member 9)	SLC6A9	706	P48067;	6ZBV;6ZPL;	Yes	No	Yes
P48960	Adhesion G protein-coupled receptor E5 (Leukocyte antigen CD97) (CD antigen CD97) [Cleaved into: Adhesion G protein-coupled receptor E5 subunit alpha; Adhesion G protein-coupled receptor E5 subunit beta]	ADGRE5 CD97	835	P48960;	2BOU;7DO4;	Yes	No	Yes
P49190	Parathyroid hormone 2 receptor (PTH2 receptor)	PTH2R PTHR2	550	P49190;	7F16;	Yes	No	Yes
P49238	CX3C chemokine receptor 1 (C-X3-C CKR-1) (CX3CR1) (Beta chemokine receptor-like 1) (CMK-BRL-1) (CMK-BRL1) (Fractalkine receptor) (G-protein coupled receptor 13) (V28)	CX3CR1 CMKBRL1 GPR13	355	P49238;	7XBW;7XBX;	Yes	No	Yes
P49279	Natural resistance-associated macrophage protein 1 (NRAMP 1) (Solute carrier family 11 member 1)	SLC11A1 LSH NRAMP NRAMP1	550	P49279;	n/a	Yes	No	Yes
P49682	C-X-C chemokine receptor type 3 (CXC-R3) (CXCR-3) (CKR-L2) (G protein-coupled receptor 9) (Interferon-inducible protein 10 receptor) (IP-10 receptor) (CD antigen CD183)	CXCR3 GPR9	368	P49682;	n/a	Yes	No	Yes
P49768	Presenilin-1 (PS-1) (EC 3.4.23.-) (Protein S182) [Cleaved into: Presenilin-1 NTF subunit; Presenilin-1 CTF subunit; Presenilin-1 CTF12 (PS1-CTF12)]	PSEN1 AD3 PS1 PSNL1	467	P49768;	2KR6;4UIS;5A63;5FN2;5FN3;5FN4;5FN5;6IDF;6IYC;6LQG;6LR4;7C9I;7D8X;	Yes	No	Yes
P50281	Matrix metalloproteinase-14 (MMP-14) (EC 3.4.24.80) (MMP-X1) (Membrane-type matrix metalloproteinase 1) (MT-MMP 1) (MTMMP1) (Membrane-type-1 matrix metalloproteinase) (MT1-MMP) (MT1MMP)	MMP14	582	P50281;	1BQQ;1BUV;2MQS;3C7X;3MA2;3X23;4P3C;4P3D;4QXU;5H0U;6CLZ;6CM1;	Yes	No	Yes
P51511	Matrix metalloproteinase-15 (MMP-15) (EC 3.4.24.-) (Membrane-type matrix metalloproteinase 2) (MT-MMP 2) (MTMMP2) (Membrane-type-2 matrix metalloproteinase) (MT2-MMP) (MT2MMP) (SMCP-2)	MMP15	669	P51511;	n/a	Yes	No	Yes
P51681	C-C chemokine receptor type 5 (C-C CKR-5) (CC-CKR-5) (CCR-5) (CCR5) (CHEMR13) (HIV-1 fusion coreceptor) (CD antigen CD195)	CCR5 CMKBR5	352	P51681;	2L87;2MZX;2RLL;2RRS;4MBS;5UIW;5YD3;5YD4;5YD5;5YY4;6FGP;6MEO;6MET;7F1Q;7F1R;7F1S;7NJZ;7NW3;7O7F;	Yes	No	Yes
P51693	Amyloid beta precursor like protein 1 (Amyloid beta (A4) precursor-like protein 1) (Amyloid-like protein 1) (APLP) (APLP-1) [Cleaved into: C30]	APLP1	650	P51693;	3PMR;3Q7G;3Q7L;3QMK;4RD9;4RDA;	Yes	No	Yes
P51787	Potassium voltage-gated channel subfamily KQT member 1 (IKs producing slow voltage-gated potassium channel subunit alpha KvLQT1) (KQT-like 1) (Voltage-gated potassium channel subunit Kv7.1)	KCNQ1 KCNA8 KCNA9 KVLQT1	676	P51787;	3BJ4;3HFC;3HFE;4UMO;4V0C;6MIE;6UZZ;6V00;6V01;	Yes	Yes	Yes
P51810	G-protein coupled receptor 143 (Ocular albinism type 1 protein)	GPR143 OA1	404	P51810;	n/a	Yes	No	Yes
P53985	Monocarboxylate transporter 1 (MCT 1) (Solute carrier family 16 member 1)	SLC16A1 MCT1	500	P53985;	6LYY;6LZ0;7CKO;7CKR;7DA5;	Yes	No	Yes
P54219	Chromaffin granule amine transporter (Solute carrier family 18 member 1) (Vesicular amine transporter 1) (VAT1)	SLC18A1 VAT1 VMAT1	525	P54219;	n/a	Yes	No	Yes
P54753	Ephrin type-B receptor 3 (EC 2.7.10.1) (EPH-like tyrosine kinase 2) (EPH-like kinase 2) (Embryonic kinase 2) (EK2) (hEK2) (Tyrosine-protein kinase TYRO6)	EPHB3 ETK2 HEK2 TYRO6	998	P54753;	3P1I;3ZFY;5L6O;5L6P;	Yes	No	Yes
P54760	Ephrin type-B receptor 4 (EC 2.7.10.1) (Hepatoma transmembrane kinase) (Tyrosine-protein kinase TYRO11)	EPHB4 HTK MYK1 TYRO11	987	P54760;	2BBA;2E7H;2HLE;2QKQ;2VWU;2VWV;2VWW;2VWX;2VWY;2VWZ;2VX0;2VX1;2X9F;2XVD;2YN8;3ZEW;4AW5;4BB4;6FNI;6FNJ;6FNK;6FNL;6FNM;	Yes	No	Yes
P54764	Ephrin type-A receptor 4 (EC 2.7.10.1) (EPH-like kinase 8) (EK8) (hEK8) (Tyrosine-protein kinase TYRO1) (Tyrosine-protein kinase receptor SEK)	EPHA4 HEK8 SEK TYRO1	986	P54764;	2LW8;2WO1;2WO2;2WO3;3CKH;3GXU;4BK4;4BK5;4BKA;4BKF;4M4P;4M4R;4W4Z;4W50;5JR2;7OFV;	Yes	No	Yes
P54849	Epithelial membrane protein 1 (EMP-1) (CL-20) (Protein B4B) (Tumor-associated membrane protein)	EMP1 B4B TMP	157	P54849;	n/a	Yes	No	Yes
P54851	Epithelial membrane protein 2 (EMP-2) (Protein XMP)	EMP2 XMP	167	P54851;	n/a	Yes	No	Yes
P54852	Epithelial membrane protein 3 (EMP-3) (Hematopoietic neural membrane protein 1) (HNMP-1) (Protein YMP)	EMP3 YMP	163	P54852;	n/a	Yes	No	Yes
P55011	Solute carrier family 12 member 2 (Basolateral Na-K-Cl symporter) (Bumetanide-sensitive sodium-(potassium)-chloride cotransporter 2)	SLC12A2 NKCC1	1212	P55011;	6PZT;7D10;7S1X;7S1Y;7S1Z;	Yes	Yes	Yes
P55064	Aquaporin-5 (AQP-5)	AQP5	265	P55064;	3D9S;5C5X;5DYE;	Yes	Yes	Yes
P55085	Proteinase-activated receptor 2 (PAR-2) (Coagulation factor II receptor-like 1) (G-protein coupled receptor 11) (Thrombin receptor-like 1) [Cleaved into: Proteinase-activated receptor 2, alternate cleaved 1; Proteinase-activated receptor 2, alternate cleaved 2]	F2RL1 GPR11 PAR2	397	P55085;	5NDD;5NDZ;5NJ6;	Yes	No	Yes
P55160	Nck-associated protein 1-like (Hematopoietic protein 1) (Membrane-associated protein HEM-1)	NCKAP1L HEM1	1127	P55160;	n/a	Yes	No	Yes
P56747	Claudin-6 (Skullin)	CLDN6 UNQ757/PRO1488	220	P56747;	n/a	Yes	No	Yes
P56748	Claudin-8	CLDN8 UNQ779/PRO1573	225	P56748;	n/a	Yes	No	Yes
P56856	Claudin-18	CLDN18 UNQ778/PRO1572	261	P56856;	n/a	Yes	No	Yes
P57739	Claudin-2 (SP82)	CLDN2 PSEC0059 SP82 UNQ705/PRO1356	230	P57739;	4YYX;	Yes	No	Yes
P60201	Myelin proteolipid protein (PLP) (Lipophilin)	PLP1 PLP	277	P60201;	2XPG;	Yes	No	Yes
P61073	C-X-C chemokine receptor type 4 (CXC-R4) (CXCR-4) (FB22) (Fusin) (HM89) (LCR1) (Leukocyte-derived seven transmembrane domain receptor) (LESTR) (Lipopolysaccharide-associated protein 3) (LAP-3) (LPS-associated protein 3) (NPYRL) (Stromal cell-derived factor 1 receptor) (SDF-1 receptor) (CD antigen CD184)	CXCR4	352	P61073;	2K03;2K04;2K05;2N55;3ODU;3OE0;3OE6;3OE8;3OE9;4RWS;	Yes	No	Yes
P78369	Claudin-10 (Oligodendrocyte-specific protein-like) (OSP-like)	CLDN10	228	P78369;	n/a	Yes	No	Yes
P98196	Phospholipid-transporting ATPase IH (EC 7.6.2.1) (ATPase IS) (ATPase class VI type 11A) (P4-ATPase flippase complex alpha subunit ATP11A)	ATP11A ATPIH ATPIS KIAA1021	1134	P98196;	n/a	Yes	No	Yes
Q01453	Peripheral myelin protein 22 (PMP-22) (Growth arrest-specific protein 3) (GAS-3)	PMP22 GAS3	160	Q01453;	n/a	Yes	No	Yes
Q01650	Large neutral amino acids transporter small subunit 1 (4F2 light chain) (4F2 LC) (4F2LC) (CD98 light chain) (Integral membrane protein E16) (E16) (L-type amino acid transporter 1) (hLAT1) (Solute carrier family 7 member 5) (y+ system cationic amino acid transporter)	SLC7A5 CD98LC LAT1 MPE16	507	Q01650;	6IRS;6IRT;6JMQ;7DSK;7DSL;7DSN;7DSQ;	Yes	No	Yes
Q01959	Sodium-dependent dopamine transporter (DA transporter) (DAT) (Solute carrier family 6 member 3)	SLC6A3 DAT1	620	Q01959;	n/a	Yes	No	Yes
Q04609	Glutamate carboxypeptidase 2 (EC 3.4.17.21) (Cell growth-inhibiting gene 27 protein) (Folate hydrolase 1) (Folylpoly-gamma-glutamate carboxypeptidase) (FGCP) (Glutamate carboxypeptidase II) (GCPII) (Membrane glutamate carboxypeptidase) (mGCP) (N-acetylated-alpha-linked acidic dipeptidase I) (NAALADase I) (Prostate-specific membrane antigen) (PSM) (PSMA) (Pteroylpoly-gamma-glutamate carboxypeptida…	FOLH1 FOLH NAALAD1 PSM PSMA GIG27	750	Q04609;	1Z8L;2C6C;2C6G;2C6P;2CIJ;2JBJ;2JBK;2OOT;2OR4;2PVV;2PVW;2XEF;2XEG;2XEI;2XEJ;3BHX;3BI0;3BI1;3BXM;3D7D;3D7F;3D7G;3D7H;3IWW;3RBU;3SJE;3SJF;3SJG;3SJX;4JYW;4JZ0;4LQG;4MCP;4MCQ;4MCR;4MCS;4NGM;4NGN;4NGP;4NGQ;4NGR;4NGS;4NGT;4OC0;4OC1;4OC2;4OC3;4OC4;4OC5;4OME;4P44;4P45;4P4B;4P4D;4P4E;4P4F;4P4I;4P4J;4W9Y;4X3R;5D29;5ELY;5F09;5O5R;5O5T;5O5U;5OF0;6ETY;6EZ9;6F5L;6FE5;6H7Y;6H7Z;6HKJ;6HKZ;6RBC;6RTI;6S1X;6SGP;6SKH…	Yes	No	Yes
Q04721	Neurogenic locus notch homolog protein 2 (Notch 2) (hN2) [Cleaved into: Notch 2 extracellular truncation (N2ECD); Notch 2 intracellular domain (N2ICD)]	NOTCH2	2471	Q04721;	2OO4;5MWB;	Yes	No	Yes
Q06481	Amyloid beta precursor like protein 2 (APPH) (Amyloid beta (A4) precursor-like protein 2) (Amyloid protein homolog) (Amyloid-like protein 2) (APLP-2) (CDEI box-binding protein) (CDEBP) (Sperm membrane protein YWK-II)	APLP2 APPL2	763	Q06481;	5JBT;5TPT;	Yes	No	Yes
Q07065	Cytoskeleton-associated protein 4 (63-kDa cytoskeleton-linking membrane protein) (Climp-63) (p63)	CKAP4	602	Q07065;	n/a	Yes	No	Yes
Q07075	Glutamyl aminopeptidase (EAP) (EC 3.4.11.7) (Aminopeptidase A) (AP-A) (Differentiation antigen gp160) (CD antigen CD249)	ENPEP	957	Q07075;	4KX7;4KX8;4KX9;4KXA;4KXB;4KXC;4KXD;	Yes	No	Yes
Q10589	Bone marrow stromal antigen 2 (BST-2) (HM1.24 antigen) (Tetherin) (CD antigen CD317)	BST2	180	Q10589;	2LK9;2X7A;2XG7;3MQ7;3MQ9;3MQB;3MQC;3NWH;4P6Z;6CM9;6CRI;6D83;6D84;6DFF;	Yes	No	Yes
Q12791	Calcium-activated potassium channel subunit alpha-1 (BK channel) (BKCA alpha) (Calcium-activated potassium channel, subfamily M subunit alpha-1) (K(VCA)alpha) (KCa1.1) (Maxi K channel) (MaxiK) (Slo-alpha) (Slo1) (Slowpoke homolog) (Slo homolog) (hSlo)	KCNMA1 KCNMA SLO	1236	Q12791;	2K44;3MT5;3NAF;6ND0;6V22;6V35;6V38;6V3G;6V5A;	Yes	Yes	Yes
Q12797	Aspartyl/asparaginyl beta-hydroxylase (EC 1.14.11.16) (Aspartate beta-hydroxylase) (ASP beta-hydroxylase) (Peptide-aspartate beta-dioxygenase)	ASPH BAH	758	Q12797;	5APA;5JQY;5JTC;5JZ6;5JZ8;5JZA;5JZU;6Q9F;6Q9I;6QA5;6RK9;6YYU;6YYV;6YYW;6YYX;6YYY;6Z6Q;6Z6R;7BMI;7BMJ;7E6J;	Yes	No	Yes
Q12809	Potassium voltage-gated channel subfamily H member 2 (Eag homolog) (Ether-a-go-go-related gene potassium channel 1) (ERG-1) (Eag-related protein 1) (Ether-a-go-go-related protein 1) (H-ERG) (hERG-1) (hERG1) (Voltage-gated potassium channel subunit Kv11.1)	KCNH2 ERG ERG1 HERG	1159	Q12809;	1BYW;1UJL;2L0W;2L1M;2L4R;2LE7;2N7G;4HP9;4HQA;5VA1;5VA2;5VA3;6SYG;	Yes	Yes	Yes
Q13336	Urea transporter 1 (Solute carrier family 14 member 1) (Urea transporter, erythrocyte)	SLC14A1 HUT11 JK RACH1 UT1 UTE	389	Q13336;	6QD5;	Yes	No	Yes
Q13433	Zinc transporter ZIP6 (Estrogen-regulated protein LIV-1) (Solute carrier family 39 member 6) (Zrt- and Irt-like protein 6) (ZIP-6)	SLC39A6 LIV1 ZIP6	755	Q13433;	n/a	Yes	No	Yes
Q13467	Frizzled-5 (Fz-5) (hFz5) (FzE5)	FZD5 C2orf31	585	Q13467;	5URY;5URZ;6O39;6WW2;	Yes	No	Yes
Q13563	Polycystin-2 (PC2) (Autosomal dominant polycystic kidney disease type II protein) (Polycystic kidney disease 2 protein) (Polycystwin) (R48321) (Transient receptor potential cation channel subfamily P member 2)	PKD2 TRPP2	968	Q13563;	2KLD;2KLE;2KQ6;2Y4Q;3HRN;3HRO;5K47;5MKE;5MKF;5T4D;6A70;6D1W;6T9N;6T9O;6WB8;	Yes	Yes	Yes
Q14003	Potassium voltage-gated channel subfamily C member 3 (KSHIIID) (Voltage-gated potassium channel subunit Kv3.3)	KCNC3	757	Q14003;	n/a	Yes	No	Yes
Q14246	Adhesion G protein-coupled receptor E1 (EGF-like module receptor 1) (EGF-like module-containing mucin-like hormone receptor-like 1) (EMR1 hormone receptor)	ADGRE1 EMR1 TM7LN3	886	Q14246;	n/a	Yes	No	Yes
Q14330	N-arachidonyl glycine receptor (NAGly receptor) (G-protein coupled receptor 18)	GPR18 GPCRW	331	Q14330;	n/a	Yes	No	Yes
Q14439	G-protein coupled receptor 176 (HB-954)	GPR176	515	Q14439;	n/a	Yes	No	Yes
Q14542	Equilibrative nucleoside transporter 2 (36 kDa nucleolar protein HNP36) (Delayed-early response protein 12) (Equilibrative nitrobenzylmercaptopurine riboside-insensitive nucleoside transporter) (Equilibrative NBMPR-insensitive nucleoside transporter) (Hydrophobic nucleolar protein, 36 kDa) (Nucleoside transporter, ei-type) (Solute carrier family 29 member 2)	SLC29A2 DER12 ENT2 HNP36	456	Q14542;	n/a	Yes	No	Yes
Q14573	Inositol 1,4,5-trisphosphate receptor type 3 (IP3 receptor isoform 3) (IP3R 3) (InsP3R3) (Type 3 inositol 1,4,5-trisphosphate receptor) (Type 3 InsP3 receptor)	ITPR3	2671	Q14573;	6DQJ;6DQN;6DQS;6DQV;6DQZ;6DR0;6DR2;6DRA;6DRC;6UQK;7T3P;7T3Q;7T3R;7T3T;7T3U;	Yes	No	Yes
Q15043	Metal cation symporter ZIP14 (LIV-1 subfamily of ZIP zinc transporter 4) (LZT-Hs4) (Solute carrier family 39 member 14) (Zrt- and Irt-like protein 14) (ZIP-14)	SLC39A14 KIAA0062 ZIP14	492	Q15043;	n/a	Yes	No	Yes
Q15049	Membrane protein MLC1	MLC1 KIAA0027 WKL1	377	Q15049;	n/a	Yes	No	Yes
Q15077	P2Y purinoceptor 6 (P2Y6)	P2RY6 PP2891	328	Q15077;	n/a	Yes	No	Yes
Q15546	Monocyte to macrophage differentiation factor (Progestin and adipoQ receptor family member 11) (Progestin and adipoQ receptor family member XI)	MMD PAQR11	238	Q15546;	n/a	Yes	No	Yes
Q15722	Leukotriene B4 receptor 1 (LTB4-R 1) (LTB4-R1) (Chemoattractant receptor-like 1) (G-protein coupled receptor 16) (P2Y purinoceptor 7) (P2Y7)	LTB4R BLT BLT1 BLTR CMKRL1 GPR16 P2RY7	352	Q15722;	7K15;7VKT;	Yes	No	Yes
Q15743	Ovarian cancer G-protein coupled receptor 1 (OGR-1) (G-protein coupled receptor 68) (GPR12A) (Sphingosylphosphorylcholine receptor)	GPR68 OGR1	365	Q15743;	n/a	Yes	No	Yes
Q15758	Neutral amino acid transporter B(0) (ATB(0)) (Baboon M7 virus receptor) (RD114/simian type D retrovirus receptor) (Sodium-dependent neutral amino acid transporter type 2) (Solute carrier family 1 member 5)	SLC1A5 ASCT2 M7V1 RDR RDRC	541	Q15758;	5LLM;5LLU;5LM4;5MJU;6GCT;6MP6;6MPB;6RVX;6RVY;7BCQ;7BCS;7BCT;	Yes	Yes	Yes
Q16348	Solute carrier family 15 member 2 (Kidney H(+)/peptide cotransporter) (Oligopeptide transporter, kidney isoform) (Peptide transporter 2)	SLC15A2 PEPT2	729	Q16348;	6EZI;7PMY;	Yes	No	Yes
Q16478	Glutamate receptor ionotropic, kainate 5 (GluK5) (Excitatory amino acid receptor 2) (EAA2) (Glutamate receptor KA-2) (KA2)	GRIK5 GRIK2	980	Q16478;	n/a	Yes	No	Yes
Q16563	Synaptophysin-like protein 1 (Pantophysin)	SYPL1 SYPL	259	Q16563;	n/a	Yes	No	Yes
Q16581	C3a anaphylatoxin chemotactic receptor (C3AR) (C3a-R)	C3AR1 AZ3B C3R1 HNFAG09	482	Q16581;	n/a	Yes	No	Yes
Q16602	Calcitonin gene-related peptide type 1 receptor (CGRP type 1 receptor) (Calcitonin receptor-like receptor)	CALCRL CGRPR	461	Q16602;	3AQF;3N7P;3N7R;3N7S;4RWF;4RWG;5V6Y;6D1U;6E3Y;6UMG;6UUN;6UUS;6UVA;6V2E;6ZHO;6ZIS;7KNT;7KNU;7P0F;7P0I;	Yes	No	Yes
Q16617	Protein NKG7 (G-CSF-induced gene 1 protein) (GIG-1 protein) (Granule membrane protein of 17 kDa) (GMP-17) (Natural killer cell protein 7) (p15-TIA-1)	NKG7 GIG1	165	Q16617;	n/a	Yes	No	Yes
Q16623	Syntaxin-1A (Neuron-specific antigen HPC-1)	STX1A STX1	288	Q16623;	n/a	Yes	No	Yes
Q16625	Occludin	OCLN	522	Q16625;	1WPA;1XAW;3G7C;	Yes	No	Yes
Q2M3G0	ATP-binding cassette sub-family B member 5 (ABCB5 P-gp) (P-glycoprotein ABCB5) (EC 7.6.2.2)	ABCB5	1257	Q2M3G0;	n/a	Yes	No	Yes
Q2Y0W8	Electroneutral sodium bicarbonate exchanger 1 (Electroneutral Na(+)-driven Cl-HCO3 exchanger) (Solute carrier family 4 member 8) (k-NBC3)	SLC4A8 KIAA0739 NBC NBC3 NDCBE1	1093	Q2Y0W8;	5JHO;	Yes	No	Yes
Q3V5L5	Alpha-1,6-mannosylglycoprotein 6-beta-N-acetylglucosaminyltransferase B (EC 2.4.1.-) (EC 2.4.1.155) (Alpha-mannoside beta-1,6-N-acetylglucosaminyltransferase B) (GlcNAc-T Vb) (GNT-Vb) (hGnTVb) (Mannoside acetylglucosaminyltransferase 5B) (N-acetylglucosaminyl-transferase Vb) (N-acetylglucosaminyltransferase IX) (GNT-IX)	MGAT5B KIAA2008	792	Q3V5L5;	n/a	Yes	No	Yes
Q401N2	Zinc-activated ligand-gated ion channel (Ligand-gated ion channel zinc-activated 1) (Ligand-gated ion-channel receptor L2)	ZACN L2 LGICZ LGICZ1 ZAC	412	Q401N2;	n/a	Yes	No	Yes
Q4KMQ2	Anoctamin-6 (Small-conductance calcium-activated nonselective cation channel) (SCAN channel) (Transmembrane protein 16F)	ANO6 TMEM16F	910	Q4KMQ2;	n/a	Yes	No	Yes
Q53GD3	Choline transporter-like protein 4 (Solute carrier family 44 member 4) (Thiamine pyrophosphate transporter 1) (hTPPT1)	SLC44A4 C6orf29 CTL4 NG22 TPPT1 UNQ441/PRO874	710	Q53GD3;	n/a	Yes	No	Yes
Q5BJF2	Sigma intracellular receptor 2 (Sigma-2 receptor) (Sigma2 receptor) (Meningioma-associated protein 30) (Transmembrane protein 97)	TMEM97 MAC30 S2R	176	Q5BJF2;	n/a	Yes	No	Yes
Q5BKX6	Solute carrier family 45 member 4	SLC45A4 KIAA1126	768	Q5BKX6;	n/a	Yes	No	Yes
Q5T601	Adhesion G-protein coupled receptor F1 (G protein-coupled receptor 110) (G protein-coupled receptor KPG_012) (G protein-coupled receptor PGR19)	ADGRF1 GPR110 PGR19	910	Q5T601;	7WU3;7WU4;7WU5;	Yes	No	Yes
Q5W0Z9	Palmitoyltransferase ZDHHC20 (EC 2.3.1.225) (Acyltransferase ZDHHC20) (EC 2.3.1.-) (DHHC domain-containing cysteine-rich protein 20) (DHHC20) (Zinc finger DHHC domain-containing protein 20)	ZDHHC20	365	Q5W0Z9;	6BML;6BMM;6BMN;7KHM;	Yes	No	Yes
Q5XXA6	Anoctamin-1 (Discovered on gastrointestinal stromal tumors protein 1) (Oral cancer overexpressed protein 2) (Transmembrane protein 16A) (Tumor-amplified and overexpressed sequence 2)	ANO1 DOG1 ORAOV2 TAOS2 TMEM16A	986	Q5XXA6;	n/a	Yes	No	Yes
Q658P3	Metalloreductase STEAP3 (EC 1.16.1.-) (Dudulin-2) (Six-transmembrane epithelial antigen of prostate 3) (Tumor suppressor-activated pathway protein 6) (hTSAP6) (pHyde) (hpHyde)	STEAP3 TSAP6	488	Q658P3;	2VNS;2VQ3;	Yes	No	Yes
Q68CR1	Protein sel-1 homolog 3 (Suppressor of lin-12-like protein 3) (Sel-1L3)	SEL1L3 KIAA0746	1132	Q68CR1;	n/a	Yes	No	Yes
Q6DN12	Multiple C2 and transmembrane domain-containing protein 2	MCTP2	878	Q6DN12;	2EP6;	Yes	No	Yes
Q6NSJ5	Volume-regulated anion channel subunit LRRC8E (Leucine-rich repeat-containing protein 8E)	LRRC8E	796	Q6NSJ5;	n/a	Yes	No	Yes
Q6NUT3	Major facilitator superfamily domain-containing protein 12	MFSD12 C19orf28	480	Q6NUT3;	n/a	Yes	No	Yes
Q6NV75	Probable G-protein coupled receptor 153 (G-protein coupled receptor PGR1)	GPR153 PGR1	609	Q6NV75;	n/a	Yes	No	Yes
Q6NVV3	Magnesium transporter NIPA3 (NIPA-like protein 1) (Non-imprinted in Prader-Willi/Angelman syndrome region protein 3)	NIPAL1 NIPA3 NPAL1	410	Q6NVV3;	n/a	Yes	No	Yes
Q6P5W5	Zinc transporter ZIP4 (Solute carrier family 39 member 4) (Zrt- and Irt-like protein 4) (ZIP-4)	SLC39A4 ZIP4	647	Q6P5W5;	n/a	Yes	No	Yes
Q6PJF5	Inactive rhomboid protein 2 (iRhom2) (Rhomboid 5 homolog 2) (Rhomboid family member 2) (Rhomboid veinlet-like protein 5) (Rhomboid veinlet-like protein 6)	RHBDF2 IRHOM2 RHBDL5 RHBDL6	856	Q6PJF5;	n/a	Yes	No	Yes
Q6ZMB5	Transmembrane protein 184A	TMEM184A	413	Q6ZMB5;	n/a	Yes	No	Yes
Q6ZMD2	Protein spinster homolog 3	SPNS3	512	Q6ZMD2;	n/a	Yes	No	Yes
Q6ZMH5	Zinc transporter ZIP5 (Solute carrier family 39 member 5) (Zrt- and Irt-like protein 5) (ZIP-5)	SLC39A5 ZIP5	540	Q6ZMH5;	n/a	Yes	No	Yes
Q6ZN44	Netrin receptor UNC5A (Protein unc-5 homolog 1) (Protein unc-5 homolog A)	UNC5A KIAA1976 UNC5H1	842	Q6ZN44;	4V2A;	Yes	No	Yes
Q6ZSS7	Major facilitator superfamily domain-containing protein 6 (Macrophage MHC class I receptor 2 homolog)	MFSD6 MMR2	791	Q6ZSS7;	n/a	Yes	No	Yes
Q6ZUX7	LHFPL tetraspan subfamily member 2 protein (Lipoma HMGIC fusion partner-like 2 protein)	LHFPL2 KIAA0206	228	Q6ZUX7;	n/a	Yes	No	Yes
Q6ZW05	Patched domain-containing protein 4 (p53-regulated patched protein)	PTCHD4 C6orf138 PTCH53	846	Q6ZW05;	n/a	Yes	No	Yes
Q70UQ0	Inhibitor of nuclear factor kappa-B kinase-interacting protein (I kappa-B kinase-interacting protein) (IKBKB-interacting protein) (IKK-interacting protein)	IKBIP IKIP	350	Q70UQ0;	n/a	Yes	No	Yes
Q7L0J3	Synaptic vesicle glycoprotein 2A	SV2A KIAA0736 PSEC0174	742	Q7L0J3;	4V11;	Yes	No	Yes
Q7L1W4	Volume-regulated anion channel subunit LRRC8D (Leucine-rich repeat-containing protein 5) (Leucine-rich repeat-containing protein 8D) (HsLRRC8D)	LRRC8D LRRC5 UNQ213/PRO239	858	Q7L1W4;	6M04;	Yes	No	Yes
Q7Z2W7	Transient receptor potential cation channel subfamily M member 8 (Long transient receptor potential channel 6) (LTrpC-6) (LTrpC6) (Transient receptor potential p8) (Trp-p8)	TRPM8 LTRPC6 TRPP8	1104	Q7Z2W7;	n/a	Yes	No	Yes
Q7Z3Q1	Solute carrier family 46 member 3	SLC46A3 FKSG16	461	Q7Z3Q1;	n/a	Yes	No	Yes
Q7Z4N2	Transient receptor potential cation channel subfamily M member 1 (Long transient receptor potential channel 1) (LTrpC1) (Melastatin-1)	TRPM1 LTRPC1 MLSN MLSN1	1603	Q7Z4N2;	n/a	Yes	No	Yes
Q7Z602	Probable G-protein coupled receptor 141 (G-protein coupled receptor PGR13)	GPR141 PGR13	305	Q7Z602;	n/a	Yes	No	Yes
Q7Z7N9	Transmembrane protein 179B	TMEM179B	219	Q7Z7N9;	n/a	Yes	No	Yes
Q86SQ4	Adhesion G-protein coupled receptor G6 (Developmentally regulated G-protein-coupled receptor) (G-protein coupled receptor 126) (Vascular inducible G protein-coupled receptor) [Cleaved into: ADGRG6 N-terminal fragment (ADGRG6-NTF); ADGRG6 C-terminal fragment (ADGRG6-CTF)]	ADGRG6 DREG GPR126 VIGR	1221	Q86SQ4;	n/a	Yes	No	Yes
Q86UD5	Sodium/hydrogen exchanger 9B2 (Na(+)/H(+) exchanger NHA2) (Na(+)/H(+) exchanger-like domain-containing protein 2) (NHE domain-containing protein 2) (Sodium/hydrogen exchanger-like domain-containing protein 2) (Solute carrier family 9 subfamily B member 2)	SLC9B2 NHA2 NHEDC2	537	Q86UD5;	7B4L;7B4M;	Yes	No	Yes
Q86UP9	LHFPL tetraspan subfamily member 3 protein (Lipoma HMGIC fusion partner-like 3 protein)	LHFPL3 LHFPL4	236	Q86UP9;	n/a	Yes	No	Yes
Q86V40	Metalloprotease TIKI1 (EC 3.4.-.-) (TRAB domain-containing protein 2A)	TRABD2A C2orf89 TIKI1	505	Q86V40;	n/a	Yes	No	Yes
Q86VL8	Multidrug and toxin extrusion protein 2 (MATE-2) (hMATE-2) (Kidney-specific H(+)/organic cation antiporter) (Solute carrier family 47 member 2)	SLC47A2 MATE2	602	Q86VL8;	n/a	Yes	No	Yes
Q86VW1	Solute carrier family 22 member 16 (Carnitine transporter 2) (CT2) (Fly-like putative transporter 2) (FLIPT2) (Flipt 2) (Organic cation transporter OKB1) (Organic cation/carnitine transporter 6)	SLC22A16 OCT6	577	Q86VW1;	n/a	Yes	No	Yes
Q86VZ1	P2Y purinoceptor 8 (P2Y8)	P2RY8	359	Q86VZ1;	n/a	Yes	No	Yes
Q86Y34	Adhesion G protein-coupled receptor G3 (G-protein coupled receptor 97) (G-protein coupled receptor PGR26)	ADGRG3 GPR97 PGR26	549	Q86Y34;	7D76;7D77;	Yes	No	Yes
Q8IWB1	Inositol 1,4,5-trisphosphate receptor-interacting protein (Protein DANGER)	ITPRIP DANGER KIAA1754	547	Q8IWB1;	n/a	Yes	No	Yes
Q8IWK6	Adhesion G protein-coupled receptor A3 (G-protein coupled receptor 125)	ADGRA3 GPR125 UNQ556/PRO1113	1321	Q8IWK6;	n/a	Yes	No	Yes
Q8IWT6	Volume-regulated anion channel subunit LRRC8A (Leucine-rich repeat-containing protein 8A) (HsLRRC8A) (Swelling protein 1)	LRRC8A KIAA1437 LRRC8 SWELL1 UNQ221/PRO247	810	Q8IWT6;	5ZSU;6DJB;	Yes	No	Yes
Q8IX19	Mast cell-expressed membrane protein 1	MCEMP1 C19orf59	187	Q8IX19;	n/a	Yes	No	Yes
Q8IY34	Solute carrier family 15 member 3 (Osteoclast transporter) (Peptide transporter 3) (Peptide/histidine transporter 2)	SLC15A3 OCTP PHT2 PTR3	581	Q8IY34;	n/a	Yes	No	Yes
Q8IZF4	Adhesion G-protein coupled receptor G5 (G-protein coupled receptor 114) (G-protein coupled receptor PGR27)	ADGRG5 GPR114 PGR27 UNQ2524/PRO6017	528	Q8IZF4;	7EQ1;	Yes	No	Yes
Q8IZJ1	Netrin receptor UNC5B (Protein unc-5 homolog 2) (Protein unc-5 homolog B) (p53-regulated receptor for death and life protein 1) (p53RDL1)	UNC5B P53RDL1 UNC5H2 UNQ1883/PRO4326	945	Q8IZJ1;	n/a	Yes	No	Yes
Q8IZM9	Probable sodium-coupled neutral amino acid transporter 6 (N-system amino acid transporter 1) (NAT-1) (Na(+)-coupled neutral amino acid transporter 6) (Solute carrier family 38 member 6)	SLC38A6 NAT1 SNAT6	456	Q8IZM9;	n/a	Yes	No	Yes
Q8IZP9	Adhesion G-protein coupled receptor G2 (G-protein coupled receptor 64) (Human epididymis-specific protein 6) (He6)	ADGRG2 GPR64 HE6 TM7LN2	1017	Q8IZP9;	n/a	Yes	No	Yes
Q8N144	Gap junction delta-3 protein (Connexin-31.9) (Cx31.9) (Gap junction alpha-11 protein) (Gap junction chi-1 protein)	GJD3 GJA11 GJC1	294	Q8N144;	n/a	Yes	No	Yes
Q8N1M1	Bestrophin-3 (Vitelliform macular dystrophy 2-like protein 3)	BEST3 VMD2L3	668	Q8N1M1;	n/a	Yes	Yes	Yes
Q8N370	Large neutral amino acids transporter small subunit 4 (L-type amino acid transporter 4) (Solute carrier family 43 member 2)	SLC43A2 LAT4 PP7664	569	Q8N370;	n/a	Yes	No	Yes
Q8N4M1	Choline transporter-like protein 3 (Solute carrier family 44 member 3)	SLC44A3 CTL3 UNQ558/PRO1115	653	Q8N4M1;	n/a	Yes	No	Yes
Q8N4S9	MARVEL domain-containing protein 2 (Tricellulin)	MARVELD2 TRIC	558	Q8N4S9;	5N7H;5N7I;5N7K;	Yes	No	Yes
Q8N6U8	G-protein coupled receptor 161 (G-protein coupled receptor RE2)	GPR161	529	Q8N6U8;	n/a	Yes	No	Yes
Q8NA29	Sodium-dependent lysophosphatidylcholine symporter 1 (NLS1) (Sodium-dependent LPC symporter 1) (Major facilitator superfamily domain-containing protein 2A) (HsMFSD2A) (MFSD2a)	MFSD2A MFSD2 NLS1 HMFN0656 PP9177 UNQ300/PRO341	543	Q8NA29;	7OIX;	Yes	No	Yes
Q8NBI5	Equilibrative nucleobase transporter 1 (Protein FOAP-13) (Solute carrier family 43 member 3)	SLC43A3 ENBT1 PSEC0252	491	Q8NBI5;	n/a	Yes	No	Yes
Q8NBJ4	Golgi membrane protein 1 (Golgi membrane protein GP73) (Golgi phosphoprotein 2)	GOLM1 C9orf155 GOLPH2 PSEC0242 UNQ686/PRO1326	401	Q8NBJ4;	n/a	Yes	No	Yes
Q8NBS3	Solute carrier family 4 member 11 (Sodium borate cotransporter 1) (NaBC1)	SLC4A11 BTR1	875	Q8NBS3;	n/a	Yes	No	Yes
Q8NCG7	Diacylglycerol lipase-beta (DAGL-beta) (DGL-beta) (EC 3.1.1.116) (KCCR13L) (PUFA-specific triacylglycerol lipase) (EC 3.1.1.3) (Sn1-specific diacylglycerol lipase beta)	DAGLB	672	Q8NCG7;	n/a	Yes	No	Yes
Q8NEB5	Phospholipid phosphatase 5 (EC 3.1.3.4) (EC 3.6.1.75) (Phosphatidic acid phosphatase type 2 domain-containing protein 1B)	PLPP5 DPPL1 HTPAP PPAPDC1B	264	Q8NEB5;	n/a	Yes	No	Yes
Q8NFF2	Sodium/potassium/calcium exchanger 4 (Na(+)/K(+)/Ca(2+)-exchange protein 4) (Solute carrier family 24 member 4)	SLC24A4 NCKX4	622	Q8NFF2;	n/a	Yes	No	Yes
Q8NFJ5	Retinoic acid-induced protein 3 (G-protein coupled receptor family C group 5 member A) (Phorbol ester induced gene 1) (PEIG-1) (Retinoic acid-induced gene 1 protein) (RAIG-1)	GPRC5A GPCR5A RAI3 RAIG1	357	Q8NFJ5;	n/a	Yes	No	Yes
Q8NGU4	Putative olfactory receptor 2I1 (Putative olfactory receptor 2I2) (Putative olfactory receptor 2I3) (Putative olfactory receptor 2I4)	OR2I1P OR2I2 OR2I3P OR2I4P	316	Q8NGU4;	n/a	Yes	No	Yes
Q8TBR7	TLC domain-containing protein 3A (Protein CT120) (Protein FAM57A)	TLCD3A FAM57A	257	Q8TBR7;	n/a	Yes	No	Yes
Q8TCB6	Olfactory receptor 51E1 (D-GPCR) (G-protein coupled receptor 164) (Olfactory receptor 52A3) (Prostate-overexpressed G protein-coupled receptor) (Prostate-specific G protein-coupled receptor 2)	OR51E1 GPR164 OR51E1P OR52A3P POGR PSGR2	317	Q8TCB6;	n/a	Yes	No	Yes
Q8TCG1	Protein CIP2A (Cancerous inhibitor of PP2A) (p90 autoantigen)	CIP2A KIAA1524	905	Q8TCG1;	5UFL;	Yes	No	Yes
Q8TCT8	Signal peptide peptidase-like 2A (SPP-like 2A) (SPPL2a) (EC 3.4.23.-) (Intramembrane protease 3) (IMP-3) (Presenilin-like protein 2)	SPPL2A IMP3 PSL2 PSEC0147	520	Q8TCT8;	n/a	Yes	No	Yes
Q8TDS5	Oxoeicosanoid receptor 1 (5-oxo-ETE G-protein coupled receptor) (G-protein coupled receptor 170) (G-protein coupled receptor R527) (G-protein coupled receptor TG1019)	OXER1 GPR170 TG1019	423	Q8TDS5;	n/a	Yes	No	Yes
Q8TDU6	G-protein coupled bile acid receptor 1 (G-protein coupled receptor GPCR19) (hGPCR19) (Membrane-type receptor for bile acids) (M-BAR) (hBG37) (BG37)	GPBAR1 TGR5	330	Q8TDU6;	7BW0;7CFM;7CFN;7XTQ;	Yes	No	Yes
Q8TDU9	Relaxin-3 receptor 2 (RLN3 receptor 2) (G-protein coupled receptor 100) (G-protein coupled receptor GPCR142) (Insulin-like peptide INSL5 receptor) (Relaxin family peptide receptor 4)	RXFP4 GPCR142 GPR100 RLN3R2	374	Q8TDU9;	n/a	Yes	No	Yes
Q8TEZ7	Membrane progestin receptor beta (mPR beta) (Lysosomal membrane protein in brain 1) (Membrane progesterone P4 receptor beta) (Membrane progesterone receptor beta) (Progesterone and adipoQ receptor family member 8) (Progestin and adipoQ receptor family member 8) (Progestin and adipoQ receptor family member VIII)	PAQR8 C6orf33 LMPB1 MPRB	354	Q8TEZ7;	n/a	Yes	No	Yes
Q8TF62	Probable phospholipid-transporting ATPase IM (EC 7.6.2.1) (ATPase class I type 8B member 4) (P4-ATPase flippase complex alpha subunit ATP8B4)	ATP8B4 KIAA1939	1192	Q8TF62;	n/a	Yes	No	Yes
Q8WUX1	Sodium-coupled neutral amino acid transporter 5 (Solute carrier family 38 member 5) (System N transporter 2)	SLC38A5 JM24 SN2 SNAT5 PP7194	472	Q8WUX1;	n/a	Yes	No	Yes
Q8WXS4	Voltage-dependent calcium channel gamma-like subunit (Neuronal voltage-gated calcium channel gamma-like subunit) (Transmembrane protein 37)	TMEM37 PR	190	Q8WXS4;	n/a	Yes	No	Yes
Q8WY07	Cationic amino acid transporter 3 (CAT-3) (CAT3) (Cationic amino acid transporter y+) (Solute carrier family 7 member 3)	SLC7A3 ATRC3 CAT3	619	Q8WY07;	n/a	Yes	No	Yes
Q93038	Tumor necrosis factor receptor superfamily member 25 (Apo-3) (Apoptosis-inducing receptor AIR) (Apoptosis-mediating receptor DR3) (Apoptosis-mediating receptor TRAMP) (Death receptor 3) (Lymphocyte-associated receptor of death) (LARD) (Protein WSL) (Protein WSL-1)	TNFRSF25 APO3 DDR3 DR3 TNFRSF12 WSL WSL1 UNQ455/PRO779	417	Q93038;	5YGP;5YGS;	Yes	No	Yes
Q969F8	KiSS-1 receptor (KiSS-1R) (G-protein coupled receptor 54) (G-protein coupled receptor OT7T175) (hOT7T175) (Hypogonadotropin-1) (Kisspeptins receptor) (Metastin receptor)	KISS1R AXOR12 GPR54	398	Q969F8;	n/a	Yes	No	Yes
Q96B33	Claudin-23	CLDN23	292	Q96B33;	n/a	Yes	No	Yes
Q96BD0	Solute carrier organic anion transporter family member 4A1 (OATP4A1) (Colon organic anion transporter) (Organic anion transporter polypeptide-related protein 1) (OATP-RP1) (OATPRP1) (POAT) (Organic anion-transporting polypeptide E) (OATP-E) (Sodium-independent organic anion transporter E) (Solute carrier family 21 member 12)	SLCO4A1 OATP1 OATP4A1 OATPE SLC21A12	722	Q96BD0;	n/a	Yes	No	Yes
Q96BI1	Solute carrier family 22 member 18 (Beckwith-Wiedemann syndrome chromosomal region 1 candidate gene A protein) (Efflux transporter-like protein) (Imprinted multi-membrane-spanning polyspecific transporter-related protein 1) (Organic cation transporter-like protein 2) (ORCTL-2) (Solute carrier family 22 member 1-like) (Tumor-suppressing STF cDNA 5 protein) (Tumor-suppressing subchromosomal transfe…	SLC22A18 BWR1A BWSCR1A HET IMPT1 ITM ORCTL2 SLC22A1L TSSC5	424	Q96BI1;	n/a	Yes	No	Yes
Q96JW4	Solute carrier family 41 member 2	SLC41A2	573	Q96JW4;	n/a	Yes	No	Yes
Q96P65	Pyroglutamylated RF-amide peptide receptor (AQ27) (G-protein coupled receptor 103) (Orexigenic neuropeptide QRFP receptor) (SP9155)	QRFPR GPR103	431	Q96P65;	n/a	Yes	No	Yes
Q96PE1	Adhesion G protein-coupled receptor A2 (G-protein coupled receptor 124) (Tumor endothelial marker 5)	ADGRA2 GPR124 KIAA1531 TEM5	1338	Q96PE1;	n/a	Yes	No	Yes
Q96RD7	Pannexin-1	PANX1 MRS1 UNQ2529/PRO6028	426	Q96RD7;	6LTN;6LTO;6M02;6M66;6M67;6M68;6V6D;6WBF;6WBG;6WBI;6WBK;6WBL;6WBM;6WBN;7DWB;7F8J;7F8N;7F8O;7WSV;	Yes	No	Yes
Q96T54	Potassium channel subfamily K member 17 (2P domain potassium channel Talk-2) (Acid-sensitive potassium channel protein TASK-4) (TWIK-related acid-sensitive K(+) channel 4) (TWIK-related alkaline pH-activated K(+) channel 2) (TALK-2)	KCNK17 TALK2 TASK4 UNQ5816/PRO19634	332	Q96T54;	n/a	Yes	Yes	Yes
Q96T83	Sodium/hydrogen exchanger 7 (Na(+)/H(+) exchanger 7) (NHE-7) (Solute carrier family 9 member 7)	SLC9A7 NHE7	725	Q96T83;	n/a	Yes	No	Yes
Q99500	Sphingosine 1-phosphate receptor 3 (S1P receptor 3) (S1P3) (Endothelial differentiation G-protein coupled receptor 3) (Sphingosine 1-phosphate receptor Edg-3) (S1P receptor Edg-3)	S1PR3 C9orf108 C9orf47 EDG3	378	Q99500;	7C4S;7EW2;7EW3;7EW4;	Yes	No	Yes
Q99624	Sodium-coupled neutral amino acid transporter 3 (N-system amino acid transporter 1) (Na(+)-coupled neutral amino acid transporter 3) (Solute carrier family 38 member 3) (System N amino acid transporter 1)	SLC38A3 G17 NAT1 SN1 SNAT3	504	Q99624;	n/a	Yes	No	Yes
Q99735	Microsomal glutathione S-transferase 2 (Microsomal GST-2) (EC 2.5.1.18) (Glutathione peroxidase MGST2) (EC 1.11.1.-) (Leukotriene C4 synthase MGST2) (EC 4.4.1.20) (Microsomal glutathione S-transferase II) (Microsomal GST-II)	MGST2 GST2	147	Q99735;	6SSR;6SSS;6SSU;6SSW;	Yes	No	Yes
Q99835	Smoothened homolog (SMO) (Protein Gx)	SMO SMOH	787	Q99835;	4JKV;4N4W;4O9R;4QIM;4QIN;5L7D;5L7I;5V56;5V57;6OT0;6XBJ;6XBK;6XBL;6XBM;7ZI0;	Yes	No	Yes
Q9BPV8	P2Y purinoceptor 13 (P2Y13) (G-protein coupled receptor 86) (G-protein coupled receptor 94)	P2RY13 GPR86 GPR94 FKSG77	354	Q9BPV8;	n/a	Yes	No	Yes
Q9BS91	Probable UDP-sugar transporter protein SLC35A5 (Solute carrier family 35 member A5)	SLC35A5 UNQ164/PRO190	424	Q9BS91;	n/a	Yes	No	Yes
Q9BSN7	Transmembrane protein 204 (Claudin-like protein 24)	TMEM204 C16orf30 CLP24 UNQ6509/PRO21434	226	Q9BSN7;	n/a	Yes	No	Yes
Q9BX79	Receptor for retinol uptake STRA6 (Retinol-binding protein receptor STRA6) (Stimulated by retinoic acid gene 6 protein homolog)	STRA6 PP14296 UNQ3126/PRO10282/PRO19578	667	Q9BX79;	n/a	Yes	Yes	Yes
Q9BX97	Plasmalemma vesicle-associated protein (Fenestrated endothelial-linked structure protein) (Plasmalemma vesicle protein 1) (PV-1)	PLVAP FELS PV1	442	Q9BX97;	n/a	Yes	No	Yes
Q9BXA5	Succinate receptor 1 (G-protein coupled receptor 91) (P2Y purinoceptor 1-like)	SUCNR1 GPR91	334	Q9BXA5;	n/a	Yes	No	Yes
Q9BXC1	Probable G-protein coupled receptor 174	GPR174 FKSG79 GPCR17	333	Q9BXC1;	n/a	Yes	No	Yes
Q9BY21	G-protein coupled receptor 87 (G-protein coupled receptor 95)	GPR87 GPR95 FKSG78	358	Q9BY21;	n/a	Yes	No	Yes
Q9BYT1	Solute carrier family 17 member 9	SLC17A9 C20orf59	436	Q9BYT1;	n/a	Yes	No	Yes
Q9C0K1	Metal cation symporter ZIP8 (BCG-induced integral membrane protein in monocyte clone 103 protein) (LIV-1 subfamily of ZIP zinc transporter 6) (LZT-Hs6) (Solute carrier family 39 member 8) (Zrt- and Irt-like protein 8) (ZIP-8)	SLC39A8 BIGM103 ZIP8 PP3105	460	Q9C0K1;	n/a	Yes	No	Yes
Q9H1C0	Lysophosphatidic acid receptor 5 (LPA receptor 5) (LPA-5) (G-protein coupled receptor 92) (G-protein coupled receptor 93)	LPAR5 GPR92 GPR93	372	Q9H1C0;	n/a	Yes	No	Yes
Q9H1C4	Protein unc-93 homolog B1 (Unc-93B1) (hUNC93B1)	UNC93B1 UNC93 UNC93B	597	Q9H1C4;	7C76;7CYN;	Yes	No	Yes
Q9H1Y3	Opsin-3 (Encephalopsin) (Panopsin)	OPN3 ECPN	402	Q9H1Y3;	n/a	Yes	No	Yes
Q9H244	P2Y purinoceptor 12 (P2Y12) (ADP-glucose receptor) (ADPG-R) (P2T(AC)) (P2Y(AC)) (P2Y(cyc)) (P2Y12 platelet ADP receptor) (P2Y(ADP)) (SP1999)	P2RY12 HORK3	342	Q9H244;	4NTJ;4PXZ;4PY0;	Yes	No	Yes
Q9H255	Olfactory receptor 51E2 (HPRAJ) (Olfactory receptor OR11-16) (Prostate-specific G-protein coupled receptor)	OR51E2 PSGR	320	Q9H255;	n/a	Yes	No	Yes
Q9H295	Dendritic cell-specific transmembrane protein (DC-STAMP) (hDC-STAMP) (Dendrocyte-expressed seven transmembrane protein) (IL-four-induced protein) (FIND) (Transmembrane 7 superfamily member 4)	DCSTAMP TM7SF4	470	Q9H295;	n/a	Yes	No	Yes
Q9H2B4	Sulfate anion transporter 1 (SAT-1) (Solute carrier family 26 member 1)	SLC26A1 SAT1	701	Q9H2B4;	n/a	Yes	No	Yes
Q9H2H9	Sodium-coupled neutral amino acid symporter 1 (Amino acid transporter A1) (N-system amino acid transporter 2) (Solute carrier family 38 member 1) (System A amino acid transporter 1) (System N amino acid transporter 1)	SLC38A1 ATA1 NAT2 SAT1 SNAT1	487	Q9H2H9;	n/a	Yes	No	Yes
Q9H2J7	Sodium-dependent neutral amino acid transporter B(0)AT2 (Sodium- and chloride-dependent neurotransmitter transporter NTT73) (Sodium-coupled branched-chain amino-acid transporter 1) (Solute carrier family 6 member 15) (Transporter v7-3)	SLC6A15 B0AT2 NTT73 SBAT1	730	Q9H2J7;	n/a	Yes	No	Yes
Q9H2X9	Solute carrier family 12 member 5 (Electroneutral potassium-chloride cotransporter 2) (K-Cl cotransporter 2) (hKCC2) (Neuronal K-Cl cotransporter)	SLC12A5 KCC2 KIAA1176	1139	Q9H2X9;	6M23;7D8Z;	Yes	No	Yes
Q9H3U5	Major facilitator superfamily domain-containing protein 1 (Smooth muscle cell-associated protein 4) (SMAP-4)	MFSD1 SMAP4 UG0581B09	465	Q9H3U5;	n/a	Yes	No	Yes
Q9H665	IGF-like family receptor 1 (Transmembrane protein 149) (U2 small nuclear RNA auxiliary factor 1-like 4)	IGFLR1 TMEM149 U2AF1L4	355	Q9H665;	n/a	Yes	No	Yes
Q9H7F0	Polyamine-transporting ATPase 13A3 (ATPase family homolog up-regulated in senescence cells 1) (Putrescine transporting ATPase) (EC 7.6.2.16)	ATP13A3 AFURS1	1226	Q9H7F0;	n/a	Yes	Yes	Yes
Q9H841	NIPA-like protein 2	NIPAL2 NPAL2	383	Q9H841;	n/a	Yes	No	Yes
Q9HB15	Potassium channel subfamily K member 12 (Tandem pore domain halothane-inhibited potassium channel 2) (THIK-2)	KCNK12	430	Q9HB15;	n/a	Yes	Yes	Yes
Q9HBA0	Transient receptor potential cation channel subfamily V member 4 (TrpV4) (Osm-9-like TRP channel 4) (OTRPC4) (Transient receptor potential protein 12) (TRP12) (Vanilloid receptor-like channel 2) (Vanilloid receptor-like protein 2) (VRL-2) (Vanilloid receptor-related osmotically-activated channel) (VR-OAC)	TRPV4 VRL2 VROAC	871	Q9HBA0;	4DX1;4DX2;7AA5;	Yes	Yes	Yes
Q9HBW9	Adhesion G protein-coupled receptor L4 (EGF, latrophilin and seven transmembrane domain-containing protein 1) (EGF-TM7-latrophilin-related protein) (ETL protein)	ADGRL4 ELTD1 ETL UNQ202/PRO228	690	Q9HBW9;	n/a	Yes	No	Yes
Q9HBX8	Leucine-rich repeat-containing G-protein coupled receptor 6	LGR6 UNQ6427/PRO21331 VTS20631	967	Q9HBX8;	n/a	Yes	No	Yes
Q9HC58	Sodium/potassium/calcium exchanger 3 (Na(+)/K(+)/Ca(2+)-exchange protein 3) (Solute carrier family 24 member 3)	SLC24A3 NCKX3	644	Q9HC58;	n/a	Yes	No	Yes
Q9HC97	G-protein coupled receptor 35 (Kynurenic acid receptor) (KYNA receptor)	GPR35	309	Q9HC97;	n/a	Yes	No	Yes
Q9HCC8	Glycerophosphoinositol inositolphosphodiesterase GDPD2 (EC 3.1.4.43) (Glycerophosphodiester phosphodiesterase 3) (Glycerophosphodiester phosphodiesterase domain-containing protein 2) (Osteoblast differentiation promoting factor)	GDPD2 GDE3 OBDPF UNQ1935/PRO4418	539	Q9HCC8;	n/a	Yes	No	Yes
Q9HCJ1	Progressive ankylosis protein homolog (ANK)	ANKH KIAA1581 UNQ241/PRO274	492	Q9HCJ1;	n/a	Yes	No	Yes
Q9NP59	Solute carrier family 40 member 1 (Ferroportin-1) (Iron-regulated transporter 1)	SLC40A1 FPN1 IREG1 SLC11A3 MSTP079	571	Q9NP59;	6W4S;6WBV;	Yes	No	Yes
Q9NP91	Sodium- and chloride-dependent transporter XTRP3 (Sodium/imino-acid transporter 1) (Solute carrier family 6 member 20) (Transporter rB21A homolog)	SLC6A20 SIT1 XT3 XTRP3	592	Q9NP91;	n/a	Yes	No	Yes
Q9NPC1	Leukotriene B4 receptor 2 (LTB4-R 2) (LTB4-R2) (LTB4 receptor JULF2) (Leukotriene B4 receptor BLT2) (Seven transmembrane receptor BLTR2)	LTB4R2 BLT2R BLTR2	358	Q9NPC1;	n/a	Yes	No	Yes
Q9NPH5	NADPH oxidase 4 (EC 1.6.3.-) (Kidney oxidase-1) (KOX-1) (Kidney superoxide-producing NADPH oxidase) (Renal NAD(P)H-oxidase)	NOX4 RENOX	578	Q9NPH5;	n/a	Yes	No	Yes
Q9NQ84	G-protein coupled receptor family C group 5 member C (Retinoic acid-induced gene 3 protein) (RAIG-3)	GPRC5C RAIG3 PSEC0087	441	Q9NQ84;	n/a	Yes	No	Yes
Q9NQC3	Reticulon-4 (Foocen) (Neurite outgrowth inhibitor) (Nogo protein) (Neuroendocrine-specific protein) (NSP) (Neuroendocrine-specific protein C homolog) (RTN-x) (Reticulon-5)	RTN4 KIAA0886 NOGO My043 SP1507	1192	Q9NQC3;	2G31;2JV5;	Yes	No	Yes
Q9NR82	Potassium voltage-gated channel subfamily KQT member 5 (KQT-like 5) (Potassium channel subunit alpha KvLQT5) (Voltage-gated potassium channel subunit Kv7.5)	KCNQ5	932	Q9NR82;	6B8Q;	Yes	Yes	Yes
Q9NRD8	Dual oxidase 2 (EC 1.11.1.-) (EC 1.6.3.1) (Large NOX 2) (Long NOX 2) (NADH/NADPH thyroid oxidase p138-tox) (NADPH oxidase/peroxidase DUOX2) (NADPH thyroid oxidase 2) (Thyroid oxidase 2) (p138 thyroid oxidase)	DUOX2 LNOX2 THOX2	1548	Q9NRD8;	n/a	Yes	No	Yes
Q9NRM0	Solute carrier family 2, facilitated glucose transporter member 9 (Glucose transporter type 9) (GLUT-9) (Urate transporter)	SLC2A9 GLUT9	540	Q9NRM0;	n/a	Yes	No	Yes
Q9NS67	Probable G-protein coupled receptor 27 (Super conserved receptor expressed in brain 1)	GPR27 SREB1	375	Q9NS67;	n/a	Yes	No	Yes
Q9NS75	Cysteinyl leukotriene receptor 2 (CysLTR2) (G-protein coupled receptor GPCR21) (hGPCR21) (G-protein coupled receptor HG57) (HPN321)	CYSLTR2 CYSLT2 CYSLT2R PSEC0146	346	Q9NS75;	n/a	Yes	No	Yes
Q9NS93	Transmembrane 7 superfamily member 3 (Seven span transmembrane protein)	TM7SF3	570	Q9NS93;	n/a	Yes	No	Yes
Q9NTQ9	Gap junction beta-4 protein (Connexin-30.3) (Cx30.3)	GJB4	266	Q9NTQ9;	n/a	Yes	Yes	Yes
Q9NX52	Rhomboid-related protein 2 (RRP2) (EC 3.4.21.105) (Rhomboid-like protein 2) [Cleaved into: Rhomboid-related protein 2, N-terminal fragment (NTF); Rhomboid-related protein 2, C-terminal fragment (CTF)]	RHBDL2	303	Q9NX52;	n/a	Yes	No	Yes
Q9NY26	Zinc transporter ZIP1 (Solute carrier family 39 member 1) (Zinc-iron-regulated transporter-like) (Zrt- and Irt-like protein 1) (ZIP-1) (hZIP1)	SLC39A1 IRT1 ZIP1 ZIRTL CGI-08 CGI-71	324	Q9NY26;	n/a	Yes	No	Yes
Q9NZ42	Gamma-secretase subunit PEN-2 (Presenilin enhancer protein 2)	PSENEN PEN2 MDS033	101	Q9NZ42;	5A63;5FN2;5FN3;5FN4;5FN5;6IDF;6IYC;6LQG;6LR4;7C9I;7D8X;	Yes	Yes	Yes
Q9NZH0	G-protein coupled receptor family C group 5 member B (A-69G12.1) (Retinoic acid-induced gene 2 protein) (RAIG-2)	GPRC5B RAIG2	403	Q9NZH0;	n/a	Yes	No	Yes
Q9NZM1	Myoferlin (Fer-1-like protein 3)	MYOF FER1L3 KIAA1207	2061	Q9NZM1;	2DMH;2K2O;6EEL;	Yes	No	Yes
Q9P241	Phospholipid-transporting ATPase VD (EC 7.6.2.1) (ATPase class V type 10D) (P4-ATPase flippase complex alpha subunit ATP10D)	ATP10D ATPVD KIAA1487	1426	Q9P241;	n/a	Yes	No	Yes
Q9UBD6	Ammonium transporter Rh type C (Rh glycoprotein kidney) (Rhesus blood group family type C glycoprotein) (Rh family type C glycoprotein) (Rh type C glycoprotein) (Tumor-related protein DRC2)	RHCG C15orf6 CDRC2 PDRC2 RHGK	479	Q9UBD6;	3HD6;	Yes	No	Yes
Q9UBH6	Xenotropic and polytropic retrovirus receptor 1 (Protein SYG1 homolog) (Xenotropic and polytropic murine leukemia virus receptor X3) (X-receptor)	XPR1 SYG1 XR	696	Q9UBH6;	5IJH;	Yes	No	Yes
Q9UBN1	Voltage-dependent calcium channel gamma-4 subunit (Neuronal voltage-gated calcium channel gamma-4 subunit) (Transmembrane AMPAR regulatory protein gamma-4) (TARP gamma-4)	CACNG4	327	Q9UBN1;	n/a	Yes	No	Yes
Q9UBY5	Lysophosphatidic acid receptor 3 (LPA receptor 3) (LPA-3) (Lysophosphatidic acid receptor Edg-7)	LPAR3 EDG7 LPA3	353	Q9UBY5;	n/a	Yes	No	Yes
Q9UGM1	Neuronal acetylcholine receptor subunit alpha-9 (Nicotinic acetylcholine receptor subunit alpha-9) (NACHR alpha-9)	CHRNA9 NACHRA9	479	Q9UGM1;	4D01;4UXU;4UY2;6HY7;	Yes	No	Yes
Q9UGQ3	Solute carrier family 2, facilitated glucose transporter member 6 (Glucose transporter type 6) (GLUT-6)	SLC2A6 GLUT6	507	Q9UGQ3;	n/a	Yes	No	Yes
Q9UHC9	NPC1-like intracellular cholesterol transporter 1 (NPC1L1) (Niemann-Pick C1-like protein 1)	NPC1L1	1359	Q9UHC9;	3QNT;7DF8;7DFW;7DFZ;7N4U;7N4V;7N4X;	Yes	No	Yes
Q9UHE8	Metalloreductase STEAP1 (EC 1.16.1.-) (Six-transmembrane epithelial antigen of prostate 1)	STEAP1 PRSS24 STEAP	339	Q9UHE8;	6Y9B;	Yes	No	Yes
Q9UHI5	Large neutral amino acids transporter small subunit 2 (L-type amino acid transporter 2) (hLAT2) (Solute carrier family 7 member 8)	SLC7A8 LAT2	535	Q9UHI5;	7B00;7CMH;7CMI;	Yes	No	Yes
Q9UHW9	Solute carrier family 12 member 6 (Electroneutral potassium-chloride cotransporter 3) (K-Cl cotransporter 3)	SLC12A6 KCC3	1150	Q9UHW9;	6M1Y;6M22;6Y5R;6Y5V;7AIN;7AIO;7D90;7NGB;	Yes	No	Yes
Q9UIG8	Solute carrier organic anion transporter family member 3A1 (OATP3A1) (Organic anion transporter polypeptide-related protein 3) (OATP-RP3) (OATPRP3) (Organic anion-transporting polypeptide D) (OATP-D) (PGE1 transporter) (Sodium-independent organic anion transporter D) (Solute carrier family 21 member 11)	SLCO3A1 OATP3A1 OATPD SLC21A11	710	Q9UIG8;	n/a	Yes	No	Yes
Q9UIQ6	Leucyl-cystinyl aminopeptidase (Cystinyl aminopeptidase) (EC 3.4.11.3) (Insulin-regulated membrane aminopeptidase) (Insulin-responsive aminopeptidase) (IRAP) (Oxytocinase) (OTase) (Placental leucine aminopeptidase) (P-LAP) [Cleaved into: Leucyl-cystinyl aminopeptidase, pregnancy serum form]	LNPEP OTASE	1025	Q9UIQ6;	4P8Q;4PJ6;4Z7I;5C97;5JHQ;5MJ6;7ZYF;	Yes	No	Yes
Q9UIX4	Potassium voltage-gated channel subfamily G member 1 (Voltage-gated potassium channel subunit Kv6.1) (kH2)	KCNG1	513	Q9UIX4;	n/a	Yes	Yes	Yes
Q9UJ42	Probable G-protein coupled receptor 160 (G-protein coupled receptor GPCR1) (hGPCR1)	GPR160 GPCR150	338	Q9UJ42;	n/a	Yes	No	Yes
Q9ULW2	Frizzled-10 (Fz-10) (hFz10) (FzE7) (CD antigen CD350)	FZD10	581	Q9ULW2;	n/a	Yes	No	Yes
Q9UM01	Y+L amino acid transporter 1 (Monocyte amino acid permease 2) (MOP-2) (Solute carrier family 7 member 7) (y(+)L-type amino acid transporter 1) (Y+LAT1) (y+LAT-1)	SLC7A7	511	Q9UM01;	n/a	Yes	No	Yes
Q9UM47	Neurogenic locus notch homolog protein 3 (Notch 3) [Cleaved into: Notch 3 extracellular truncation; Notch 3 intracellular domain]	NOTCH3	2321	Q9UM47;	4ZLP;5CZV;5CZX;6WQU;6XSW;	Yes	No	Yes
Q9UMX9	Membrane-associated transporter protein (Melanoma antigen AIM1) (Protein AIM-1) (Solute carrier family 45 member 2)	SLC45A2 AIM1 MATP	530	Q9UMX9;	n/a	Yes	No	Yes
Q9UN76	Sodium- and chloride-dependent neutral and basic amino acid transporter B(0+) (Amino acid transporter ATB0+) (Solute carrier family 6 member 14)	SLC6A14	642	Q9UN76;	n/a	Yes	No	Yes
Q9UNW8	Probable G-protein coupled receptor 132 (G2 accumulation protein)	GPR132 G2A	380	Q9UNW8;	n/a	Yes	No	Yes
Q9UP95	Solute carrier family 12 member 4 (Electroneutral potassium-chloride cotransporter 1) (Erythroid K-Cl cotransporter 1) (hKCC1)	SLC12A4 KCC1	1085	Q9UP95;	6KKR;6KKT;6KKU;7AIP;7AIQ;7AIR;7TTH;7TTI;	Yes	No	Yes
Q9UPC5	Probable G-protein coupled receptor 34	GPR34	381	Q9UPC5;	n/a	Yes	No	Yes
Q9UPI3	Feline leukemia virus subgroup C receptor-related protein 2 (Calcium-chelate transporter) (CCT)	FLVCR2 C14orf58	526	Q9UPI3;	n/a	Yes	No	Yes
Q9UQQ1	Aminopeptidase NAALADL1 (EC 3.4.11.-) (100 kDa ileum brush border membrane protein) (I100) (Ileal dipeptidylpeptidase) (N-acetylated-alpha-linked acidic dipeptidase-like protein) (NAALADase L)	NAALADL1 NAALADASEL NAALADL	740	Q9UQQ1;	4TWE;	Yes	No	Yes
Q9Y257	Potassium channel subfamily K member 6 (Inward rectifying potassium channel protein TWIK-2) (TWIK-originated similarity sequence)	KCNK6 TOSS TWIK2	313	Q9Y257;	n/a	Yes	Yes	Yes
Q9Y271	Cysteinyl leukotriene receptor 1 (CysLTR1) (Cysteinyl leukotriene D4 receptor) (LTD4 receptor) (G-protein coupled receptor HG55) (HMTMF81)	CYSLTR1 CYSLT1	337	Q9Y271;	6RZ4;6RZ5;	Yes	No	Yes
Q9Y2C5	Probable small intestine urate exporter (Solute carrier family 17 member 4)	SLC17A4	497	Q9Y2C5;	n/a	Yes	No	Yes
Q9Y2Q0	Phospholipid-transporting ATPase IA (EC 7.6.2.1) (ATPase class I type 8A member 1) (Chromaffin granule ATPase II) (P4-ATPase flippase complex alpha subunit ATP8A1)	ATP8A1 ATPIA	1164	Q9Y2Q0;	6K7G;6K7H;6K7I;6K7J;6K7K;6K7L;6K7M;6K7N;	Yes	No	Yes
Q9Y345	Sodium- and chloride-dependent glycine transporter 2 (GlyT-2) (GlyT2) (Solute carrier family 6 member 5)	SLC6A5 GLYT2 NET1	797	Q9Y345;	n/a	Yes	No	Yes
Q9Y4D7	Plexin-D1	PLXND1 KIAA0620	1925	Q9Y4D7;	3H6N;	Yes	No	Yes
Q9Y5I7	Claudin-16 (Paracellin-1) (PCLN-1)	CLDN16 PCLN1	235	Q9Y5I7;	n/a	Yes	No	Yes
Q9Y5R2	Matrix metalloproteinase-24 (MMP-24) (EC 3.4.24.-) (Membrane-type matrix metalloproteinase 5) (MT-MMP 5) (MTMMP5) (Membrane-type-5 matrix metalloproteinase) (MT5-MMP) (MT5MMP) [Cleaved into: Processed matrix metalloproteinase-24]	MMP24 MT5MMP	645	Q9Y5R2;	n/a	Yes	No	Yes
Q9Y5S1	Transient receptor potential cation channel subfamily V member 2 (TrpV2) (Osm-9-like TRP channel 2) (OTRPC2) (Vanilloid receptor-like protein 1) (VRL-1)	TRPV2 VRL	764	Q9Y5S1;	2F37;	Yes	Yes	Yes
Q9Y5S8	NADPH oxidase 1 (NOX-1) (EC 1.-.-.-) (Mitogenic oxidase 1) (MOX-1) (NADH/NADPH mitogenic oxidase subunit P65-MOX) (NOH-1)	NOX1 MOX1 NOH1	564	Q9Y5S8;	n/a	Yes	No	Yes
Q9Y653	Adhesion G-protein coupled receptor G1 (G-protein coupled receptor 56) (Protein TM7XN1) [Cleaved into: ADGRG1 N-terminal fragment (ADGRG1 NT) (GPR56 N-terminal fragment) (GPR56 NT) (GPR56(N)) (GPR56 extracellular subunit) (GPR56 subunit alpha); ADGRG1 C-terminal fragment (ADGRG1 CT) (GPR56 C-terminal fragment) (GPR56 CT) (GPR56(C)) (GPR56 seven-transmembrane subunit) (GPR56 7TM) (GPR56 subunit be…	ADGRG1 GPR56 TM7LN4 TM7XN1 UNQ540/PRO1083	693	Q9Y653;	7SF8;	Yes	No	Yes
Q9Y666	Solute carrier family 12 member 7 (Electroneutral potassium-chloride cotransporter 4) (K-Cl cotransporter 4)	SLC12A7 KCC4	1083	Q9Y666;	7D99;	Yes	No	Yes
Q9Y696	Chloride intracellular channel protein 4 (Intracellular chloride ion channel protein p64H1)	CLIC4	253	Q9Y696;	2AHE;2D2Z;3OQS;	Yes	No	Yes
Q9Y6H6	Potassium voltage-gated channel subfamily E member 3 (MinK-related peptide 2) (Minimum potassium ion channel-related peptide 2) (Potassium channel subunit beta MiRP2)	KCNE3	103	Q9Y6H6;	2NDJ;6V00;6V01;	Yes	No	Yes
Q9Y6L6	Solute carrier organic anion transporter family member 1B1 (SLCO1B1) (Liver-specific organic anion transporter 1) (LST-1) (OATP-C) (Organic anion transporter SLC21A6) (Sodium-independent organic anion-transporting polypeptide 2) (OATP-2) (Solute carrier family 21 member 6)	SLCO1B1 LST1 OATP1B1 OATP2 OATPC SLC21A6	691	Q9Y6L6;	n/a	Yes	No	Yes
Q9Y6R1	Electrogenic sodium bicarbonate cotransporter 1 (Sodium bicarbonate cotransporter) (Na(+)/HCO3(-) cotransporter) (Solute carrier family 4 member 4) (kNBC1)	SLC4A4 NBC NBC1 NBCE1	1079	Q9Y6R1;	6CAA;	Yes	Yes	Yes
P15924	Desmoplakin (DP) (250/210 kDa paraneoplastic pemphigus antigen)	DSP	2871	n/a	1LM5;1LM7;3R6N;5DZZ;	No	No	Yes
P11532	Dystrophin	DMD	3685	n/a	1DXX;1EG3;1EG4;3UUN;	No	No	Yes
P46939	Utrophin (Dystrophin-related protein 1) (DRP-1)	UTRN DMDL DRP1	3433	n/a	1BHD;1QAG;6M5G;	No	No	Yes
B0I1T2	Unconventional myosin-Ig [Cleaved into: Minor histocompatibility antigen HA-2 (mHag HA-2)]	MYO1G HA2	1018	B0I1T2;	n/a	No	No	Yes
C9J798	Ras GTPase-activating protein 4B	RASA4B	803	C9J798;	n/a	No	No	Yes
O14492	SH2B adapter protein 2 (Adapter protein with pleckstrin homology and Src homology 2 domains) (SH2 and PH domain-containing adapter protein APS)	SH2B2 APS	632	O14492;	1Q2H;	No	No	Yes
O15296	Polyunsaturated fatty acid lipoxygenase ALOX15B (15-lipoxygenase 2) (15-LOX-2) (Arachidonate 15-lipoxygenase B) (15-LOX-B) (EC 1.13.11.33) (Arachidonate 15-lipoxygenase type II) (Linoleate 13-lipoxygenase 15-LOb) (EC 1.13.11.-)	ALOX15B	676	O15296;	4NRE;7LAF;	No	No	Yes
O60936	Nucleolar protein 3 (Apoptosis repressor with CARD) (Muscle-enriched cytoplasmic protein) (Myp) (Nucleolar protein of 30 kDa) (Nop30)	NOL3 ARC NOP	208	O60936;	4UZ0;	No	No	Yes
O75330	Hyaluronan mediated motility receptor (Intracellular hyaluronic acid-binding protein) (Receptor for hyaluronan-mediated motility) (CD antigen CD168)	HMMR IHABP RHAMM	724	O75330;	n/a	No	No	Yes
O75427	Leucine-rich repeat and calponin homology domain-containing protein 4 (Leucine-rich repeat neuronal protein 4) (Leucine-rich neuronal protein)	LRCH4 LRN LRRN1 LRRN4	683	O75427;	n/a	No	No	Yes
O94868	F-BAR and double SH3 domains protein 2 (Carom) (Protein nervous wreck 1) (NWK1) (SH3 multiple domains protein 3)	FCHSD2 KIAA0769 SH3MD3	740	O94868;	2DL5;2DL7;6GBU;	No	No	Yes
O95425	Supervillin (Archvillin) (p205/p250)	SVIL	2214	O95425;	2K6M;2K6N;	No	No	Yes
O95980	Reversion-inducing cysteine-rich protein with Kazal motifs (hRECK) (Suppressor of tumorigenicity 15 protein)	RECK ST15	971	O95980;	n/a	No	No	Yes
P04083	Annexin A1 (Annexin I) (Annexin-1) (Calpactin II) (Calpactin-2) (Chromobindin-9) (Lipocortin I) (Phospholipase A2 inhibitory protein) (p35) [Cleaved into: Annexin Ac2-26]	ANXA1 ANX1 LPC1	346	P04083;	1AIN;1BO9;1QLS;5VFW;	No	No	Yes
P04632	Calpain small subunit 1 (CSS1) (Calcium-activated neutral proteinase small subunit) (CANP small subunit) (Calcium-dependent protease small subunit) (CDPS) (Calcium-dependent protease small subunit 1) (Calpain regulatory subunit)	CAPNS1 CAPN4 CAPNS	268	P04632;	1KFU;1KFX;4PHJ;4PHK;4PHM;4WQ2;4WQ3;5D69;6QLB;	No	No	Yes
P04899	Guanine nucleotide-binding protein G(i) subunit alpha-2 (Adenylate cyclase-inhibiting G alpha protein)	GNAI2 GNAI2B	355	P04899;	6D9H;7F8V;7LD3;7LD4;7WV9;7WVV;7WVW;7WVX;7WVY;	No	No	Yes
P06702	Protein S100-A9 (Calgranulin-B) (Calprotectin L1H subunit) (Leukocyte L1 complex heavy chain) (Migration inhibitory factor-related protein 14) (MRP-14) (p14) (S100 calcium-binding protein A9)	S100A9 CAGB CFAG MRP14	114	P06702;	1IRJ;1XK4;4GGF;4XJK;5I8N;5W1F;6DS2;	No	No	Yes
P06703	Protein S100-A6 (Calcyclin) (Growth factor-inducible protein 2A9) (MLN 4) (Prolactin receptor-associated protein) (PRA) (S100 calcium-binding protein A6)	S100A6 CACY	90	P06703;	1K8U;1K96;1K9K;1K9P;2M1K;4YBH;	No	No	Yes
P07332	Tyrosine-protein kinase Fes/Fps (EC 2.7.10.2) (Feline sarcoma/Fujinami avian sarcoma oncogene homolog) (Proto-oncogene c-Fes) (Proto-oncogene c-Fps) (p93c-fes)	FES FPS	822	P07332;	1WQU;2DCR;3BKB;3CBL;3CD3;4DYL;4E93;6JMF;7T1K;7T1L;	No	No	Yes
P11142	Heat shock cognate 71 kDa protein (EC 3.6.4.10) (Heat shock 70 kDa protein 8) (Lipopolysaccharide-associated protein 1) (LAP-1) (LPS-associated protein 1)	HSPA8 HSC70 HSP73 HSPA10	646	P11142;	3AGY;3AGZ;3ESK;3FZF;3FZH;3FZK;3FZL;3FZM;3LDQ;3M3Z;4H5N;4H5R;4H5T;4H5V;4H5W;4HWI;4KBQ;5AQF;5AQG;5AQH;5AQI;5AQJ;5AQK;5AQL;5AQM;5AQN;5AQO;5AQP;5AQQ;5AQR;5AQS;5AQT;5AQU;5AQV;6B1I;6B1M;6B1N;6ZYJ;	No	No	Yes
P12814	Alpha-actinin-1 (Alpha-actinin cytoskeletal isoform) (F-actin cross-linking protein) (Non-muscle alpha-actinin-1)	ACTN1	892	P12814;	2EYI;2EYN;2N8Y;2N8Z;	No	No	Yes
P12829	Myosin light chain 4 (Myosin light chain 1, embryonic muscle/atrial isoform) (Myosin light chain alkali GT-1 isoform)	MYL4 MLC1 PRO1957	197	P12829;	n/a	No	No	Yes
P13796	Plastin-2 (L-plastin) (LC64P) (Lymphocyte cytosolic protein 1) (LCP-1)	LCP1 PLS2	627	P13796;	2D85;5JOJ;5JOL;6VEC;	No	No	Yes
P14923	Junction plakoglobin (Catenin gamma) (Desmoplakin III) (Desmoplakin-3)	JUP CTNNG DP3	745	P14923;	3IFQ;	No	No	Yes
P15311	Ezrin (Cytovillin) (Villin-2) (p81)	EZR VIL2	586	P15311;	1NI2;4RM8;4RM9;4RMA;7T1K;7T1L;	No	No	Yes
P21333	Filamin-A (FLN-A) (Actin-binding protein 280) (ABP-280) (Alpha-filamin) (Endothelial actin-binding protein) (Filamin-1) (Non-muscle filamin)	FLNA FLN FLN1	2647	P21333;	2AAV;2BP3;2BRQ;2J3S;2JF1;2K3T;2K7P;2K7Q;2MTP;2W0P;2WFN;3CNK;3HOC;3HOP;3HOR;3ISW;3RGH;4M9P;4P3W;5XR1;6D8C;6EW1;	No	No	Yes
P22079	Lactoperoxidase (LPO) (EC 1.11.1.7) (Salivary peroxidase) (SPO)	LPO SAPX	712	P22079;	n/a	No	No	Yes
P26038	Moesin (Membrane-organizing extension spike protein)	MSN	577	P26038;	1E5W;1EF1;1SGH;6TXQ;6TXS;	No	No	Yes
P27216	Annexin A13 (Annexin XIII) (Annexin-13) (Intestine-specific annexin) (ISA)	ANXA13 ANX13	316	P27216;	6B3I;	No	No	Yes
P30533	Alpha-2-macroglobulin receptor-associated protein (Alpha-2-MRAP) (Low density lipoprotein receptor-related protein-associated protein 1) (RAP)	LRPAP1 A2MRAP	357	P30533;	1LRE;1NRE;1OP1;1OV2;2FCW;2FTU;2FYL;2P01;2P03;	No	No	Yes
P34947	G protein-coupled receptor kinase 5 (EC 2.7.11.16) (G protein-coupled receptor kinase GRK5)	GRK5 GPRK5	590	P34947;	4TNB;4TND;6PJX;	No	No	Yes
P35052	Glypican-1 [Cleaved into: Secreted glypican-1]	GPC1	558	P35052;	4ACR;4AD7;4BWE;4YWT;	No	No	Yes
P35221	Catenin alpha-1 (Alpha E-catenin) (Cadherin-associated protein) (Renal carcinoma antigen NY-REN-13)	CTNNA1	906	P35221;	1H6G;4EHP;4IGG;6UPV;6V2O;6V2P;	No	No	Yes
P35222	Catenin beta-1 (Beta-catenin)	CTNNB1 CTNNB OK/SW-cl.35 PRO2286	781	P35222;	1G3J;1JDH;1JPW;1LUJ;1P22;1QZ7;1T08;1TH1;2G57;2GL7;2Z6H;3DIW;3FQN;3FQR;3SL9;3SLA;3TX7;4DJS;6M90;6M91;6M92;6M93;6M94;6O9B;6O9C;6WLX;6WNX;7AFW;7AR4;	No	No	Yes
P35241	Radixin	RDX	583	P35241;	n/a	No	No	Yes
P35579	Myosin-9 (Cellular myosin heavy chain, type A) (Myosin heavy chain 9) (Myosin heavy chain, non-muscle IIa) (Non-muscle myosin heavy chain A) (NMMHC-A) (Non-muscle myosin heavy chain IIa) (NMMHC II-a) (NMMHC-IIA)	MYH9	1960	P35579;	2LNK;3ZWH;4CFQ;4CFR;4ETO;	No	No	Yes
P40123	Adenylyl cyclase-associated protein 2 (CAP 2)	CAP2	477	P40123;	n/a	No	No	Yes
P41220	Regulator of G-protein signaling 2 (RGS2) (Cell growth-inhibiting gene 31 protein) (G0/G1 switch regulatory protein 8)	RGS2 G0S8 GIG31	211	P41220;	2AF0;2V4Z;4EKC;4EKD;	No	No	Yes
P46940	Ras GTPase-activating-like protein IQGAP1 (p195)	IQGAP1 KIAA0051	1657	P46940;	1X0H;2RR8;3FAY;3I6X;5L0O;	No	No	Yes
P49327	Fatty acid synthase (EC 2.3.1.85) (Type I fatty acid synthase) [Includes: [Acyl-carrier-protein] S-acetyltransferase (EC 2.3.1.38); [Acyl-carrier-protein] S-malonyltransferase (EC 2.3.1.39); 3-oxoacyl-[acyl-carrier-protein] synthase (EC 2.3.1.41); 3-oxoacyl-[acyl-carrier-protein] reductase (EC 1.1.1.100); 3-hydroxyacyl-[acyl-carrier-protein] dehydratase (EC 4.2.1.59); Enoyl-[acyl-carrier-protein]…	FASN FAS	2511	P49327;	1XKT;2CG5;2JFD;2JFK;2PX6;3HHD;3TJM;4PIV;4W82;4W9N;4Z49;5C37;6NNA;7MHD;7MHE;	No	No	Yes
P49619	Diacylglycerol kinase gamma (DAG kinase gamma) (EC 2.7.1.107) (Diglyceride kinase gamma) (DGK-gamma)	DGKG DAGK3	791	P49619;	n/a	No	No	Yes
P50148	Guanine nucleotide-binding protein G(q) subunit alpha (Guanine nucleotide-binding protein alpha-q)	GNAQ GAQ	359	P50148;	6VU5;7EZM;7F6H;7F6I;7F8W;7XOW;7XOX;	No	No	Yes
P51654	Glypican-3 (GTR2-2) (Intestinal protein OCI-5) (MXR7) [Cleaved into: Glypican-3 alpha subunit; Glypican-3 beta subunit]	GPC3 OCI5	580	P51654;	n/a	No	No	Yes
P63096	Guanine nucleotide-binding protein G(i) subunit alpha-1 (Adenylate cyclase-inhibiting G alpha protein)	GNAI1	354	P63096;	1KJY;1Y3A;2G83;2GTP;2IK8;2OM2;2XNS;3ONW;3QE0;3QI2;3UMR;3UMS;4G5Q;5JS7;5JS8;5TDH;6CMO;6CRK;6DDE;6DDF;6KPF;6KPG;6LFM;6LFO;6LML;6N4B;6OMM;6OS9;6OSA;6OT0;6PB0;6PB1;6PT0;6QNO;6VU8;6XBJ;6XBK;6XBL;6XBM;7CMU;7CMV;7DB6;7DW9;7E2X;7E2Y;7E2Z;7E32;7E33;7E9G;7EB2;7EJX;7EO2;7EO4;7EUO;7EVY;7EVZ;7EW0;7EW1;7EW2;7EW3;7EW4;7EW7;7EXD;7EZH;7EZK;7EZM;7F1Q;7F1R;7F1S;7F4D;7F4F;7F4H;7F4I;7JHJ;7JVR;7L0P;7L0Q;7L0R;7L0S;7MTS…	No	No	Yes
Q00610	Clathrin heavy chain 1 (Clathrin heavy chain on chromosome 17) (CLH-17)	CLTC CLH17 CLTCL2 KIAA0034	1675	Q00610;	2XZG;4G55;6E4L;6QNN;6QNP;7BN1;7BN2;	No	No	Yes
Q07912	Activated CDC42 kinase 1 (ACK-1) (EC 2.7.10.2) (EC 2.7.11.1) (Tyrosine kinase non-receptor protein 2)	TNK2 ACK1	1038	Q07912;	1CF4;1U46;1U4D;1U54;3EQP;3EQR;4EWH;4HZR;4HZS;4ID7;5ZXB;6VQM;7KP6;	No	No	Yes
Q08116	Regulator of G-protein signaling 1 (RGS1) (B-cell activation protein BL34) (Early response protein 1R20)	RGS1 1R20 BL34 IER1	209	Q08116;	2BV1;2GTP;	No	No	Yes
Q13009	Rho guanine nucleotide exchange factor TIAM1 (T-lymphoma invasion and metastasis-inducing protein 1) (TIAM-1)	TIAM1	1591	Q13009;	2D8I;3KZD;3KZE;4GVC;4GVD;4K2O;4K2P;4NXP;4NXQ;4NXR;	No	No	Yes
Q13153	Serine/threonine-protein kinase PAK 1 (EC 2.7.11.1) (Alpha-PAK) (p21-activated kinase 1) (PAK-1) (p65-PAK)	PAK1	545	Q13153;	1F3M;1YHV;1YHW;1ZSG;2HY8;2QME;3DVP;3FXZ;3FY0;3Q4Z;3Q52;3Q53;4DAW;4EQC;4O0R;4O0T;4P90;4ZJI;4ZJJ;4ZLO;4ZY4;4ZY5;4ZY6;5DEW;5DEY;5DFP;5IME;5KBQ;5KBR;6B16;	No	No	Yes
Q13158	FAS-associated death domain protein (FAS-associating death domain-containing protein) (Growth-inhibiting gene 3 protein) (Mediator of receptor induced toxicity)	FADD MORT1 GIG3	208	Q13158;	1A1W;1A1Z;1E3Y;1E41;2GF5;3EZQ;3OQ9;6ACI;7LXC;	No	No	Yes
Q13325	Interferon-induced protein with tetratricopeptide repeats 5 (IFIT-5) (Interferon-induced 58 kDa protein) (Retinoic acid- and interferon-inducible 58 kDa protein) (P58)	IFIT5 ISG58 RI58	482	Q13325;	3ZGQ;4HOQ;4HOR;4HOS;4HOT;4J0U;	No	No	Yes
Q13421	Mesothelin (CAK1 antigen) (Pre-pro-megakaryocyte-potentiating factor) [Cleaved into: Megakaryocyte-potentiating factor (MPF); Mesothelin, cleaved form]	MSLN MPF	630	Q13421;	4F3F;7U8C;	No	No	Yes
Q13515	Phakinin (49 kDa cytoskeletal protein) (Beaded filament structural protein 2) (Lens fiber cell beaded filament protein CP 47) (CP47) (Lens fiber cell beaded filament protein CP 49) (CP49) (Lens intermediate filament-like light) (LIFL-L)	BFSP2	415	Q13515;	n/a	No	No	Yes
Q14678	KN motif and ankyrin repeat domain-containing protein 1 (Ankyrin repeat domain-containing protein 15) (Kidney ankyrin repeat-containing protein)	KANK1 ANKRD15 KANK KIAA0172	1352	Q14678;	5YBJ;5YBU;	No	No	Yes
Q15811	Intersectin-1 (SH3 domain-containing protein 1A) (SH3P17)	ITSN1 ITSN SH3D1A	1721	Q15811;	1KI1;2KGR;2KHN;3FIA;3QBV;4IIM;5HZI;5HZJ;5HZK;6GBU;6H5T;	No	No	Yes
Q16512	Serine/threonine-protein kinase N1 (EC 2.7.11.13) (Protease-activated kinase 1) (PAK-1) (Protein kinase C-like 1) (Protein kinase C-like PKN) (Protein kinase PKN-alpha) (Protein-kinase C-related kinase 1) (Serine-threonine protein kinase N)	PKN1 PAK1 PKN PRK1 PRKCL1	942	Q16512;	1CXZ;1URF;2RMK;4NKG;4OTD;4OTG;4OTH;4OTI;	No	No	Yes
Q5T2T1	MAGUK p55 subfamily member 7	MPP7	576	Q5T2T1;	3LRA;3O46;	No	No	Yes
Q6UX06	Olfactomedin-4 (OLM4) (Antiapoptotic protein GW112) (G-CSF-stimulated clone 1 protein) (hGC-1) (hOLfD)	OLFM4 GW112 UNQ362/PRO698	510	Q6UX06;	n/a	No	No	Yes
Q6YHK3	CD109 antigen (150 kDa TGF-beta-1-binding protein) (C3 and PZP-like alpha-2-macroglobulin domain-containing protein 7) (Platelet-specific Gov antigen) (p180) (r150) (CD antigen CD109)	CD109 CPAMD7	1445	Q6YHK3;	n/a	No	No	Yes
Q8IUD2	ELKS/Rab6-interacting/CAST family member 1 (ERC-1) (Rab6-interacting protein 2)	ERC1 ELKS KIAA1081 RAB6IP2	1116	Q8IUD2;	n/a	No	No	Yes
Q8IYJ3	Synaptotagmin-like protein 1 (Exophilin-7) (Protein JFC1)	SYTL1 SLP1 SB146	562	Q8IYJ3;	n/a	No	No	Yes
Q8IZJ4	Ral-GDS-related protein (hRGR) (Ral guanine nucleotide dissociation stimulator-like 4) (RalGDS-like 4)	RGL4 RGR	473	Q8IZJ4;	n/a	No	No	Yes
Q8N3E9	1-phosphatidylinositol 4,5-bisphosphate phosphodiesterase delta-3 (EC 3.1.4.11) (Phosphoinositide phospholipase C-delta-3) (Phospholipase C-delta-3) (PLC-delta-3)	PLCD3 KIAA1964	789	Q8N3E9;	n/a	No	No	Yes
Q8NDX1	PH and SEC7 domain-containing protein 4 (Exchange factor for ADP-ribosylation factor guanine nucleotide factor 6 B) (Exchange factor for ARF6 B) (Pleckstrin homology and SEC7 domain-containing protein 4) (Telomeric of interleukin-1 cluster protein)	PSD4 EFA6B TIC	1056	Q8NDX1;	n/a	No	No	Yes
Q8TCU6	Phosphatidylinositol 3,4,5-trisphosphate-dependent Rac exchanger 1 protein (P-Rex1) (PtdIns(3,4,5)-dependent Rac exchanger 1)	PREX1 KIAA1415	1659	Q8TCU6;	3QIK;4YON;5D27;5D3V;5D3W;5D3X;5D3Y;5FI0;5FI1;6PCV;6VSK;7RX9;	No	No	Yes
Q8WVF1	Protein OSCP1 (hOSCP1) (Organic solute transport protein 1) (Oxidored-nitro domain-containing protein 1)	OSCP1 C1orf102 NOR1	389	Q8WVF1;	n/a	No	No	Yes
Q92681	Regulatory solute carrier protein family 1 member 1 (Transporter regulator RS1) (hRS1)	RSC1A1	617	Q92681;	n/a	No	No	Yes
Q96FJ0	AMSH-like protease (AMSH-LP) (EC 3.4.19.-) (STAM-binding protein-like 1)	STAMBPL1 AMSHLP KIAA1373	436	Q96FJ0;	2ZNR;2ZNV;7L97;	No	No	Yes
Q99959	Plakophilin-2	PKP2	881	Q99959;	3TT9;	No	No	Yes
Q9BYI3	Hyccin (Down-regulated by CTNNB1 protein A)	HYCC1 DRCTNNB1A FAM126A	521	Q9BYI3;	5DSE;6BQ1;	No	No	Yes
Q9H4G0	Band 4.1-like protein 1 (Erythrocyte membrane protein band 4.1-like 1) (Neuronal protein 4.1) (4.1N)	EPB41L1 KIAA0338	881	Q9H4G0;	n/a	No	No	Yes
Q9H4M9	EH domain-containing protein 1 (PAST homolog 1) (hPAST1) (Testilin)	EHD1 PAST PAST1 CDABP0131	534	Q9H4M9;	2JQ6;2KFF;2KFG;2KFH;2KSP;	No	No	Yes
Q9HC29	Nucleotide-binding oligomerization domain-containing protein 2 (Caspase recruitment domain-containing protein 15) (Inflammatory bowel disease protein 1)	NOD2 CARD15 IBD1	1040	Q9HC29;	n/a	No	No	Yes
Q9HCH5	Synaptotagmin-like protein 2 (Breast cancer-associated antigen SGA-72M) (Exophilin-4)	SYTL2 KIAA1597 SGA72M SLP2 SLP2A	934	Q9HCH5;	3BC1;7OPP;7OPQ;7OPR;	No	No	Yes
Q9HD67	Unconventional myosin-X (Unconventional myosin-10)	MYO10 KIAA0799	2058	Q9HD67;	2LW9;3AU4;3AU5;3PZD;5I0H;5I0I;5KG8;	No	No	Yes
Q9NSC5	Homer protein homolog 3 (Homer-3)	HOMER3	361	Q9NSC5;	2P8V;3CVF;	No	No	Yes
Q9NWH9	SAFB-like transcription modulator (Modulator of estrogen-induced transcription)	SLTM MET	1034	Q9NWH9;	n/a	No	No	Yes
Q9NYT0	Pleckstrin-2	PLEK2	353	Q9NYT0;	1X1G;	No	No	Yes
Q9NZN3	EH domain-containing protein 3 (PAST homolog 3)	EHD3 EHD2 PAST3	535	Q9NZN3;	n/a	No	No	Yes
Q9NZN4	EH domain-containing protein 2 (PAST homolog 2)	EHD2 PAST2	543	Q9NZN4;	n/a	No	No	Yes
Q9P2M7	Cingulin	CGN KIAA1319	1203	Q9P2M7;	n/a	No	No	Yes
Q9UKJ5	Cysteine-rich hydrophobic domain-containing protein 2 (BrX-like translocated in leukemia)	CHIC2 BTL	165	Q9UKJ5;	n/a	No	No	Yes
Q9Y250	Leucine zipper putative tumor suppressor 1 (F37/esophageal cancer-related gene-coding leucine-zipper motif) (Fez1)	LZTS1 FEZ1	596	Q9Y250;	n/a	No	No	Yes
Q9Y446	Plakophilin-3	PKP3	797	Q9Y446;	n/a	No	No	Yes
Q9Y6Q9	Nuclear receptor coactivator 3 (NCoA-3) (EC 2.3.1.48) (ACTR) (Amplified in breast cancer 1 protein) (AIB-1) (CBP-interacting protein) (pCIP) (Class E basic helix-loop-helix protein 42) (bHLHe42) (Receptor-associated coactivator 3) (RAC-3) (Steroid receptor coactivator protein 3) (SRC-3) (Thyroid hormone receptor activator molecule 1) (TRAM-1)	NCOA3 AIB1 BHLHE42 RAC3 TRAM1	1424	Q9Y6Q9;	1KBH;3L3X;3L3Z;6ES7;6SQC;	No	No	Yes
A2A2Y4	FERM domain-containing protein 3 (Band 4.1-like protein 4O) (Ovary type protein 4.1) (4.1O)	FRMD3 EPB41L4O	597	A2A2Y4;	n/a	Yes	No	No
A6NK97	Solute carrier family 22 member 20 (Organic anion transporter 6) (Solute carrier family 22 member 20 pseudogene)	SLC22A20P OAT6 SLC22A20	555	A6NK97;	n/a	Yes	No	No
A6NKX4	Putative solute carrier family 22 member 31	SLC22A31	556	A6NKX4;	n/a	Yes	No	No
A6QL63	Ankyrin repeat and BTB/POZ domain-containing protein 3 (BTB/POZ domain-containing protein 11)	ABTB3 BTBD11	1104	A6QL63;	n/a	Yes	No	No
A9Z1Z3	Fer-1-like protein 4	FER1L4 C20orf124	1794	A9Z1Z3;	n/a	Yes	No	No
B2RTY4	Unconventional myosin-IXa (Unconventional myosin-9a)	MYO9A MYR7	2548	B2RTY4;	n/a	Yes	No	No
O00299	Chloride intracellular channel protein 1 (Chloride channel ABP) (Nuclear chloride ion channel 27) (NCC27) (Regulatory nuclear chloride ion channel protein) (hRNCC)	CLIC1 G6 NCC27	241	O00299;	1K0M;1K0N;1K0O;1RK4;3O3T;3P8W;3P90;3QR6;3SWL;3TGZ;3UVH;4IQA;4JZQ;4K0G;4K0N;7F8R;7FBQ;	Yes	No	No
O00391	Sulfhydryl oxidase 1 (hQSOX) (EC 1.8.3.2) (Quiescin Q6)	QSOX1 QSCN6 UNQ2520/PRO6013	747	O00391;	3LLI;3LLK;3Q6O;4IJ3;	Yes	No	No
O00461	Golgi integral membrane protein 4 (Golgi integral membrane protein, cis) (GIMPc) (Golgi phosphoprotein 4) (Golgi-localized phosphoprotein of 130 kDa) (Golgi phosphoprotein of 130 kDa)	GOLIM4 GIMPC GOLPH4 GPP130	696	O00461;	n/a	Yes	No	No
O00767	Stearoyl-CoA desaturase (hSCD1) (EC 1.14.19.1) (Acyl-CoA desaturase) (Delta(9)-desaturase) (Delta-9 desaturase) (Fatty acid desaturase)	SCD FADS5 SCD1 SCDOS	359	O00767;	4ZYO;	Yes	No	No
O14684	Prostaglandin E synthase (EC 5.3.99.3) (Glutathione peroxidase PTGES) (EC 1.11.1.-) (Glutathione transferase PTGES) (EC 2.5.1.18) (Microsomal glutathione S-transferase 1-like 1) (MGST1-L1) (Microsomal prostaglandin E synthase 1) (MPGES-1) (p53-induced gene 12 protein)	PTGES MGST1L1 MPGES1 PGES PIG12	152	O14684;	3DWW;4AL0;4AL1;4BPM;4WAB;4YK5;4YL0;4YL1;4YL3;5BQG;5BQH;5BQI;5K0I;5T36;5T37;5TL9;6VL4;	Yes	No	No
O14880	Microsomal glutathione S-transferase 3 (Microsomal GST-3) (Glutathione peroxidase MGST3) (EC 1.11.1.-) (LTC4 synthase MGST3) (EC 4.4.1.20) (Microsomal glutathione S-transferase III) (Microsomal GST-III)	MGST3	152	O14880;	n/a	Yes	No	No
O15121	Sphingolipid delta(4)-desaturase DES1 (EC 1.14.19.17) (Cell migration-inducing gene 15 protein) (Degenerative spermatocyte homolog 1) (Dihydroceramide desaturase-1) (Membrane lipid desaturase) (Retinol isomerase) (EC 5.2.1.-)	DEGS1 DES1 MLD MIG15	323	O15121;	n/a	Yes	No	No
O15400	Syntaxin-7	STX7	261	O15400;	n/a	Yes	No	No
O43731	ER lumen protein-retaining receptor 3 (KDEL endoplasmic reticulum protein retention receptor 3) (KDEL receptor 3)	KDELR3 ERD23	214	O43731;	n/a	Yes	No	No
O43861	Probable phospholipid-transporting ATPase IIB (EC 7.6.2.1) (ATPase class II type 9B)	ATP9B ATPIIB NEO1L HUSSY-20	1147	O43861;	n/a	Yes	No	No
O60238	BCL2/adenovirus E1B 19 kDa protein-interacting protein 3-like (Adenovirus E1B19K-binding protein B5) (BCL2/adenovirus E1B 19 kDa protein-interacting protein 3A) (NIP3-like protein X) (NIP3L)	BNIP3L BNIP3A BNIP3H NIX	219	O60238;	n/a	Yes	No	No
O60427	Acyl-CoA (8-3)-desaturase (EC 1.14.19.44) (Delta(5) fatty acid desaturase) (D5D) (Delta(5) desaturase) (Delta-5 desaturase) (Fatty acid desaturase 1)	FADS1 FADSD5	444	O60427;	n/a	Yes	No	No
O60725	Protein-S-isoprenylcysteine O-methyltransferase (EC 2.1.1.100) (Isoprenylcysteine carboxylmethyltransferase) (Prenylated protein carboxyl methyltransferase) (PPMT) (Prenylcysteine carboxyl methyltransferase) (pcCMT)	ICMT PCCMT	284	O60725;	n/a	Yes	No	No
O75069	Transmembrane and coiled-coil domains protein 2 (Cerebral protein 11)	TMCC2 KIAA0481 hucep-11	709	O75069;	n/a	Yes	No	No
O75298	Reticulon-2 (Neuroendocrine-specific protein-like 1) (NSP-like protein 1) (Neuroendocrine-specific protein-like I) (NSP-like protein I) (NSPLI)	RTN2 NSPL1	545	O75298;	n/a	Yes	No	No
O76062	Delta(14)-sterol reductase TM7SF2 (Delta-14-SR) (EC 1.3.1.70) (3-beta-hydroxysterol Delta (14)-reductase) (Another new gene 1 protein) (C-14 sterol reductase) (C14SR) (Putative sterol reductase SR-1) (Sterol C14-reductase) (Transmembrane 7 superfamily member 2)	TM7SF2 ANG1	418	O76062;	n/a	Yes	No	No
O94823	Phospholipid-transporting ATPase VB (EC 7.6.2.1) (ATPase class V type 10B) (P4-ATPase flippase complex alpha subunit ATP10B)	ATP10B ATPVB KIAA0715	1461	O94823;	n/a	Yes	No	No
O94876	Transmembrane and coiled-coil domains protein 1	TMCC1 KIAA0779	653	O94876;	n/a	Yes	No	No
O95772	STARD3 N-terminal-like protein (MLN64 N-terminal domain homolog)	STARD3NL MENTHO UNQ855/PRO1864	234	O95772;	n/a	Yes	No	No
O95807	Transmembrane protein 50A (Small membrane protein 1)	TMEM50A SMP1 UNQ386/PRO718	157	O95807;	n/a	Yes	No	No
O95833	Chloride intracellular channel protein 3	CLIC3	236	O95833;	3FY7;3KJY;	Yes	No	No
P04843	Dolichyl-diphosphooligosaccharide--protein glycosyltransferase subunit 1 (Dolichyl-diphosphooligosaccharide--protein glycosyltransferase 67 kDa subunit) (Ribophorin I) (RPN-I) (Ribophorin-1)	RPN1	607	P04843;	6S7O;6S7T;	Yes	No	No
P09601	Heme oxygenase 1 (HO-1) (EC 1.14.14.18) [Cleaved into: Heme oxygenase 1 soluble form]	HMOX1 HO HO1	288	P09601;	1N3U;1N45;1NI6;1OYK;1OYL;1OZE;1OZL;1OZR;1OZW;1S13;1S8C;1T5P;1TWN;1TWR;1XJZ;1XK0;1XK1;1XK2;1XK3;3CZY;3HOK;3K4F;3TGM;4WD4;5BTQ;6EHA;	Yes	No	No
P10415	Apoptosis regulator Bcl-2	BCL2	239	P10415;	1G5M;1GJH;1YSW;2O21;2O22;2O2F;2W3L;2XA0;4AQ3;4IEH;4LVT;4LXD;4MAN;5AGW;5AGX;5FCG;5JSN;5VAU;5VAX;5VAY;6GL8;6IWB;6O0K;6O0L;6O0M;6O0O;6O0P;7LHB;	Yes	No	No
P10620	Microsomal glutathione S-transferase 1 (Microsomal GST-1) (EC 2.5.1.18) (Microsomal GST-I)	MGST1 GST12 MGST	155	P10620;	n/a	Yes	No	No
P12236	ADP/ATP translocase 3 (ADP,ATP carrier protein 3) (ADP,ATP carrier protein, isoform T2) (ANT 2) (Adenine nucleotide translocator 3) (ANT 3) (Solute carrier family 25 member 6) [Cleaved into: ADP/ATP translocase 3, N-terminally processed]	SLC25A6 AAC3 ANT3 CDABP0051	298	P12236;	n/a	Yes	No	No
P14679	Tyrosinase (EC 1.14.18.1) (LB24-AB) (Monophenol monooxygenase) (SK29-AB) (Tumor rejection antigen AB)	TYR	529	P14679;	n/a	Yes	No	No
P16260	Solute carrier family 25 member 16 (Graves disease autoantigen) (GDA) (Graves disease carrier protein) (GDC) (Mitochondrial solute carrier protein homolog)	SLC25A16 GDA	332	P16260;	n/a	Yes	No	No
P16435	NADPH--cytochrome P450 reductase (CPR) (P450R) (EC 1.6.2.4)	POR CYPOR	677	P16435;	1B1C;3FJO;3QE2;3QFC;3QFR;3QFS;3QFT;5EMN;5FA6;	Yes	No	No
P17861	X-box-binding protein 1 (XBP-1) (Tax-responsive element-binding protein 5) (TREB-5) [Cleaved into: X-box-binding protein 1, cytoplasmic form; X-box-binding protein 1, luminal form]	XBP1 TREB5 XBP2	261	P17861;	6R5Q;6R6G;6R6P;6R7Q;	Yes	No	No
P20292	Arachidonate 5-lipoxygenase-activating protein (FLAP) (MK-886-binding protein)	ALOX5AP FLAP	161	P20292;	2Q7M;2Q7R;6VGC;6VGI;	Yes	Yes	No
P21145	Myelin and lymphocyte protein (T-lymphocyte maturation-associated protein)	MAL	153	P21145;	n/a	Yes	No	No
P24390	ER lumen protein-retaining receptor 1 (KDEL endoplasmic reticulum protein retention receptor 1) (KDEL receptor 1) (Putative MAPK-activating protein PM23)	KDELR1 ERD2.1	212	P24390;	n/a	Yes	No	No
P24557	Thromboxane-A synthase (TXA synthase) (TXS) (EC 5.3.99.5) (Cytochrome P450 5A1) (Hydroperoxy icosatetraenoate dehydratase) (EC 4.2.1.152)	TBXAS1 CYP5 CYP5A1 TXAS	533	P24557;	n/a	Yes	No	No
P27544	Ceramide synthase 1 (CerS1) (LAG1 longevity assurance homolog 1) (Longevity assurance gene 1 protein homolog 1) (Protein UOG-1) (Sphingoid base N-stearoyltransferase CERS1) (EC 2.3.1.299)	CERS1 LAG1 LASS1 UOG1	350	P27544;	n/a	Yes	No	No
P30536	Translocator protein (Mitochondrial benzodiazepine receptor) (PKBS) (Peripheral-type benzodiazepine receptor) (PBR)	TSPO BZRP MBR	169	P30536;	n/a	Yes	No	No
P33897	ATP-binding cassette sub-family D member 1 (EC 3.1.2.-) (EC 7.6.2.-) (Adrenoleukodystrophy protein) (ALDP)	ABCD1 ALD	745	P33897;	7RR9;7RRA;7SHM;7SHN;7VWC;7VX8;7VZB;	Yes	No	No
P33947	ER lumen protein-retaining receptor 2 (ERD2-like protein 1) (ELP-1) (KDEL endoplasmic reticulum protein retention receptor 2) (KDEL receptor 2)	KDELR2 ERD2.2	212	P33947;	n/a	Yes	No	No
P35610	Sterol O-acyltransferase 1 (EC 2.3.1.26) (Acyl-coenzyme A:cholesterol acyltransferase 1) (ACAT-1) (Cholesterol acyltransferase 1)	SOAT1 ACACT ACACT1 ACAT ACAT1 SOAT STAT	550	P35610;	6L47;6L48;6P2J;6P2P;6VUM;	Yes	No	No
P55344	Lens fiber membrane intrinsic protein (MP18) (MP19) (MP20)	LIM2	173	P55344;	n/a	Yes	No	No
P55851	Mitochondrial uncoupling protein 2 (UCP 2) (Solute carrier family 25 member 8) (UCPH)	UCP2 SLC25A8	309	P55851;	n/a	Yes	No	No
P55916	Mitochondrial uncoupling protein 3 (UCP 3) (Solute carrier family 25 member 9)	UCP3 SLC25A9	312	P55916;	n/a	Yes	No	No
P57057	Glucose-6-phosphate exchanger SLC37A1 (Glycerol-3-phosphate permease) (G-3-P permease) (Solute carrier family 37 member 1)	SLC37A1 G3PP	533	P57057;	n/a	Yes	No	No
P57088	Transmembrane protein 33 (Protein DB83) (SHINC-3)	TMEM33 DB83	247	P57088;	n/a	Yes	No	No
P61619	Protein transport protein Sec61 subunit alpha isoform 1 (Sec61 alpha-1)	SEC61A1 SEC61A	476	P61619;	6W6L;	Yes	No	No
P98194	Calcium-transporting ATPase type 2C member 1 (ATPase 2C1) (EC 7.2.2.10) (ATP-dependent Ca(2+) pump PMR1) (Ca(2+)/Mn(2+)-ATPase 2C1) (Secretory pathway Ca(2+)-transporting ATPase type 1) (SPCA1)	ATP2C1 KIAA1347 PMR1L HUSSY-28	919	P98194;	n/a	Yes	No	No
Q03518	Antigen peptide transporter 1 (APT1) (EC 7.4.2.14) (ATP-binding cassette sub-family B member 2) (Peptide supply factor 1) (Peptide transporter PSF1) (PSF-1) (Peptide transporter TAP1) (Peptide transporter involved in antigen processing 1) (Really interesting new gene 4 protein) (RING4)	TAP1 ABCB2 PSF1 RING4 Y3	748	Q03518;	1JJ7;5U1D;	Yes	No	No
Q03519	Antigen peptide transporter 2 (APT2) (EC 7.4.2.14) (ATP-binding cassette sub-family B member 3) (Peptide supply factor 2) (Peptide transporter PSF2) (PSF-2) (Peptide transporter TAP2) (Peptide transporter involved in antigen processing 2) (Really interesting new gene 11 protein) (RING11)	TAP2 ABCB3 PSF2 RING11 Y1	686	Q03519;	5U1D;	Yes	No	No
Q07812	Apoptosis regulator BAX (Bcl-2-like protein 4) (Bcl2-L-4)	BAX BCL2L4	192	Q07812;	1F16;2G5B;2K7W;2LR1;3PK1;3PL7;4BD2;4BD6;4BD7;4BD8;4BDU;4S0O;4S0P;4UF2;4ZIE;4ZIF;4ZIG;4ZIH;4ZII;5W5X;5W5Z;5W60;5W61;6EB6;6L8V;6L95;6TRR;6XY6;7ADT;	Yes	No	No
Q07817	Bcl-2-like protein 1 (Bcl2-L-1) (Apoptosis regulator Bcl-X)	BCL2L1 BCL2L BCLX	233	Q07817;	1BXL;1G5J;1LXL;1MAZ;1R2D;1R2E;1R2G;1R2H;1R2I;1YSG;1YSI;1YSN;2B48;2LP8;2LPC;2M03;2M04;2ME8;2ME9;2MEJ;2O1Y;2O2M;2O2N;2P1L;2PON;2YJ1;2YQ6;2YQ7;2YXJ;3CVA;3FDL;3FDM;3INQ;3IO8;3PL7;3QKD;3R85;3SP7;3SPF;3WIZ;3ZK6;3ZLN;3ZLO;3ZLR;4A1U;4A1W;4AQ3;4BPK;4C52;4C5D;4CIN;4EHR;4HNJ;4IEH;4PPI;4QVE;4QVF;4QVX;4TUH;4Z9V;5AGW;5AGX;5B1Z;5C3G;5FMJ;5FMK;5VAY;5VX3;6BF2;6DCN;6DCO;6F46;6HJL;6IJQ;6LHD;6O0K;6O0L;6O0M;6O0O;6O0P…	Yes	No	No
Q08477	Cytochrome P450 4F3 (EC 1.14.14.1) (20-hydroxyeicosatetraenoic acid synthase) (20-HETE synthase) (CYPIVF3) (Cytochrome P450-LTB-omega) (Docosahexaenoic acid omega-hydroxylase CYP4F3) (EC 1.14.14.79) (Leukotriene-B(4) 20-monooxygenase 2) (Leukotriene-B(4) omega-hydroxylase 2) (EC 1.14.14.94)	CYP4F3 LTB4H	520	Q08477;	n/a	Yes	No	No
Q09328	Alpha-1,6-mannosylglycoprotein 6-beta-N-acetylglucosaminyltransferase A (EC 2.4.1.155) (Alpha-mannoside beta-1,6-N-acetylglucosaminyltransferase V) (GlcNAc-T V) (GNT-V) (Mannoside acetylglucosaminyltransferase 5) (N-acetylglucosaminyl-transferase V) [Cleaved into: Secreted alpha-1,6-mannosylglycoprotein 6-beta-N-acetylglucosaminyltransferase A (Secreted beta-1,6-N-acetylglucosaminyltransferase V)…	MGAT5 GGNT5	741	Q09328;	5ZIB;5ZIC;6YJQ;6YJR;6YJS;6YJT;6YJU;6YJV;	Yes	No	No
Q13021	MAL-like protein (Protein BENE)	MALL BENE	153	Q13021;	n/a	Yes	No	No
Q13370	cGMP-inhibited 3',5'-cyclic phosphodiesterase 3B (EC 3.1.4.17) (CGIPDE1) (CGIP1) (Cyclic GMP-inhibited phosphodiesterase B) (CGI-PDE B)	PDE3B	1112	Q13370;	1SO2;1SOJ;	Yes	No	No
Q14494	Endoplasmic reticulum membrane sensor NFE2L1 (Locus control region-factor 1) (LCR-F1) (Nuclear factor erythroid 2-related factor 1) (NF-E2-related factor 1) (NFE2-related factor 1) (Nuclear factor, erythroid derived 2, like 1) (Protein NRF1, p120 form) (Transcription factor 11) (TCF-11) [Cleaved into: Transcription factor NRF1 (Protein NRF1, p110 form)]	NFE2L1 HBZ17 NRF1 TCF11	772	Q14494;	n/a	Yes	No	No
Q14739	Delta(14)-sterol reductase LBR (Delta-14-SR) (EC 1.3.1.70) (3-beta-hydroxysterol Delta (14)-reductase) (C-14 sterol reductase) (C14SR) (Integral nuclear envelope inner membrane protein) (LMN2R) (Lamin-B receptor) (Sterol C14-reductase)	LBR	615	Q14739;	2DIG;	Yes	No	No
Q15125	3-beta-hydroxysteroid-Delta(8),Delta(7)-isomerase (EC 5.3.3.5) (Cholestenol Delta-isomerase) (Delta(8)-Delta(7) sterol isomerase) (D8-D7 sterol isomerase) (Emopamil-binding protein)	EBP	230	Q15125;	6OHT;6OHU;	Yes	No	No
Q15842	ATP-sensitive inward rectifier potassium channel 8 (Inward rectifier K(+) channel Kir6.1) (Potassium channel, inwardly rectifying subfamily J member 8) (uKATP-1)	KCNJ8	424	Q15842;	n/a	Yes	Yes	No
Q16281	Cyclic nucleotide-gated cation channel alpha-3 (Cone photoreceptor cGMP-gated channel subunit alpha) (Cyclic nucleotide-gated channel alpha-3) (CNG channel alpha-3) (CNG-3) (CNG3)	CNGA3 CNCG3	694	Q16281;	3SWY;7RHS;	Yes	No	No
Q16611	Bcl-2 homologous antagonist/killer (Apoptosis regulator BAK) (Bcl-2-like protein 7) (Bcl2-L-7)	BAK1 BAK BCL2L7 CDN1	211	Q16611;	1BXL;2IMS;2IMT;2JBY;2JCN;2LP8;2M5B;2XPX;2YV6;3I1H;3QBR;4D2L;4U2U;4U2V;4UF1;5AJK;5FMI;5FMK;5VWV;5VWW;5VWX;5VWY;5VWZ;5VX0;5VX1;6ODH;6UXM;6UXN;6UXO;6UXP;6UXQ;6UXR;7K02;7LK4;7M5A;7M5B;7OFM;7OFO;	Yes	No	No
Q16647	Prostacyclin synthase (EC 5.3.99.4) (Hydroperoxy icosatetraenoate dehydratase) (EC 4.2.1.152) (Prostaglandin I2 synthase)	PTGIS CYP8 CYP8A1	500	Q16647;	2IAG;3B6H;	Yes	No	No
Q16850	Lanosterol 14-alpha demethylase (LDM) (EC 1.14.14.154) (CYPLI) (Cytochrome P450 51A1) (Cytochrome P450-14DM) (Cytochrome P45014DM) (Cytochrome P450LI) (Sterol 14-alpha demethylase)	CYP51A1 CYP51	509	Q16850;	3JUS;3JUV;3LD6;4UHI;4UHL;6Q2T;6UEZ;	Yes	No	No
Q16873	Leukotriene C4 synthase (LTC4 synthase) (EC 4.4.1.20) (Glutathione S-transferase LTC4) (EC 2.5.1.-) (Leukotriene-C(4) synthase) (Leukotriene-C4 synthase)	LTC4S	150	Q16873;	2PNO;2UUH;2UUI;3B29;3HKK;3LEO;3PCV;4BPM;4J7T;4J7Y;4JC7;4JCZ;4JRZ;4WAB;5HV9;6R7D;	Yes	No	No
Q2PZI1	Probable C-mannosyltransferase DPY19L1 (EC 2.4.1.-) (Dpy-19-like protein 1) (Protein dpy-19 homolog 1)	DPY19L1 GA0500 KIAA0877	675	Q2PZI1;	n/a	Yes	No	No
Q2T9K0	Transmembrane protein 44	TMEM44	475	Q2T9K0;	n/a	Yes	No	No
Q2VYF4	LETM1 domain-containing protein LETM2, mitochondrial (LETM1 and EF-hand domain-containing protein 2) (Leucine zipper-EF-hand-containing transmembrane protein 1-like)	LETM2	491	Q2VYF4;	n/a	Yes	No	No
Q494W8	CHRNA7-FAM7A fusion protein (CHRNA7-DR1) (D-10)	CHRFAM7A	412	Q494W8;	n/a	Yes	No	No
Q53TN4	Plasma membrane ascorbate-dependent reductase CYBRD1 (EC 7.2.1.3) (Cytochrome b reductase 1) (Duodenal cytochrome b) (Ferric-chelate reductase 3)	CYBRD1 DCYTB FRRS3	286	Q53TN4;	5ZLE;5ZLG;	Yes	No	No
Q5H9R4	Armadillo repeat-containing X-linked protein 4	ARMCX4	2290	Q5H9R4;	n/a	Yes	No	No
Q5T2E6	Armadillo-like helical domain-containing protein 3	ARMH3 C10orf76	689	Q5T2E6;	n/a	Yes	No	No
Q5TGI0	Failed axon connections homolog	FAXC C6orf168	409	Q5TGI0;	n/a	Yes	No	No
Q5TGY1	Transmembrane and coiled-coil domain-containing protein 4	TMCO4	634	Q5TGY1;	n/a	Yes	No	No
Q5TH69	Brefeldin A-inhibited guanine nucleotide-exchange protein 3 (ARFGEF family member 3)	ARFGEF3 BIG3 C6orf92 KIAA1244	2177	Q5TH69;	n/a	Yes	No	No
Q5VTY9	Protein-cysteine N-palmitoyltransferase HHAT (EC 2.3.1.-) (Hedgehog acyltransferase) (Melanoma antigen recognized by T-cells 2) (MART-2) (Skinny hedgehog protein 1)	HHAT MART2 SKI1	493	Q5VTY9;	6P64;6UJO;6UJQ;6UK2;6UK4;7MHY;7MHZ;7Q1U;7Q6Z;7URF;	Yes	Yes	No
Q5VW36	Focadhesin	FOCAD KIAA1797	1801	Q5VW36;	n/a	Yes	No	No
Q5VWC8	Very-long-chain (3R)-3-hydroxyacyl-CoA dehydratase 4 (EC 4.2.1.134) (3-hydroxyacyl-CoA dehydratase 4) (HACD4) (Protein-tyrosine phosphatase-like A domain-containing protein 2)	HACD4 PTPLAD2	232	Q5VWC8;	n/a	Yes	No	No
Q643R3	Lysophospholipid acyltransferase LPCAT4 (1-acylglycerol-3-phosphate O-acyltransferase 7) (1-AGP acyltransferase 7) (1-AGPAT 7) (1-acylglycerophosphocholine O-acyltransferase) (EC 2.3.1.23) (1-acylglycerophosphoserine O-acyltransferase) (EC 2.3.1.n6) (1-alkenylglycerophosphoethanolamine O-acyltransferase) (EC 2.3.1.121) (1-alkylglycerophosphocholine O-acetyltransferase) (EC 2.3.1.67) (Acyltransfer…	LPCAT4 AGPAT7 AYTL3 LPEAT2	524	Q643R3;	n/a	Yes	No	No
Q68CJ9	Cyclic AMP-responsive element-binding protein 3-like protein 3 (cAMP-responsive element-binding protein 3-like protein 3) (Transcription factor CREB-H) [Cleaved into: Processed cyclic AMP-responsive element-binding protein 3-like protein 3]	CREB3L3 CREBH HYST1481	461	Q68CJ9;	n/a	Yes	No	No
Q68CQ1	Maestro heat-like repeat-containing protein family member 7 (HEAT repeat-containing protein 8)	MROH7 C1orf175 HEATR8	1323	Q68CQ1;	n/a	Yes	No	No
Q68G75	LEM domain-containing protein 1 (Cancer/testis antigen 50) (CT50) (LEM domain protein 1) (LEMP-1)	LEMD1	181	Q68G75;	n/a	Yes	No	No
Q69YG0	Transmembrane protein 42	TMEM42	159	Q69YG0;	n/a	Yes	No	No
Q6AZY7	Scavenger receptor class A member 3 (Cellular stress response gene protein)	SCARA3 CSR	606	Q6AZY7;	n/a	Yes	No	No
Q6GPH6	Inositol 1,4,5-trisphosphate receptor-interacting protein-like 1	ITPRIPL1 KIAA1754L	555	Q6GPH6;	n/a	Yes	No	No
Q6NTF9	Rhomboid domain-containing protein 2	RHBDD2 RHBDL7	364	Q6NTF9;	n/a	Yes	No	No
Q6NUK1	Calcium-binding mitochondrial carrier protein SCaMC-1 (Mitochondrial ATP-Mg/Pi carrier protein 1) (Mitochondrial Ca(2+)-dependent solute carrier protein 1) (Small calcium-binding mitochondrial carrier protein 1) (Solute carrier family 25 member 24)	SLC25A24 APC1 MCSC1 SCAMC1	477	Q6NUK1;	4N5X;4ZCU;4ZCV;	Yes	No	No
Q6NUT2	Probable C-mannosyltransferase DPY19L2 (EC 2.4.1.-) (Dpy-19-like protein 2) (Protein dpy-19 homolog 2)	DPY19L2 UNQ3127/PRO10284	758	Q6NUT2;	n/a	Yes	No	No
Q6NZ63	STEAP family member 1B	STEAP1B	245	Q6NZ63;	n/a	Yes	No	No
Q6P179	Endoplasmic reticulum aminopeptidase 2 (EC 3.4.11.-) (Leukocyte-derived arginine aminopeptidase) (L-RAP)	ERAP2 LRAP	960	Q6P179;	3SE6;4E36;4JBS;5AB0;5AB2;5CU5;5J6S;5K1V;6EA4;7NSK;7NUP;7P7P;7PFS;7SH0;	Yes	No	No
Q6P4E1	Protein GOLM2 (Cancer susceptibility candidate gene 4 protein) (CASC4) (Golgi membrane protein 2)	GOLM2 CASC4 UNQ2573/PRO6308	436	Q6P4E1;	n/a	Yes	No	No
Q6RW13	Type-1 angiotensin II receptor-associated protein (AT1 receptor-associated protein)	AGTRAP ATRAP	159	Q6RW13;	n/a	Yes	No	No
Q6Y1H2	Very-long-chain (3R)-3-hydroxyacyl-CoA dehydratase 2 (EC 4.2.1.134) (3-hydroxyacyl-CoA dehydratase 2) (HACD2) (Protein-tyrosine phosphatase-like member B)	HACD2 PTPLB	254	Q6Y1H2;	n/a	Yes	No	No
Q6ZMG9	Ceramide synthase 6 (CerS6) (LAG1 longevity assurance homolog 6) (Sphingoid base N-palmitoyltransferase CERS6) (EC 2.3.1.291)	CERS6 LASS6	384	Q6ZMG9;	n/a	Yes	No	No
Q6ZMZ3	Nesprin-3 (KASH domain-containing protein 3) (KASH3) (Nuclear envelope spectrin repeat protein 3)	SYNE3 C14orf139 C14orf49 LINC00341	975	Q6ZMZ3;	6WME;	Yes	No	No
Q6ZWT7	Lysophospholipid acyltransferase 2 (LPLAT 2) (EC 2.3.1.-) (1-acylglycerophosphate O-acyltransferase MBOAT2) (EC 2.3.1.51) (1-acylglycerophosphocholine O-acyltransferase MBOAT2) (EC 2.3.1.23) (1-acylglycerophosphoethanolamine MBOAT2 O-acyltransferase) (EC 2.3.1.n7) (Lysophosphatidic acid acyltransferase) (LPAAT) (Lyso-PA acyltransferase) (Lysophosphatidylcholine acyltransferase) (LPCAT) (Lyso-PC a…	MBOAT2 LPCAT4 OACT2	520	Q6ZWT7;	n/a	Yes	No	No
Q71RS6	Sodium/potassium/calcium exchanger 5 (Na(+)/K(+)/Ca(2+)-exchange protein 5) (Solute carrier family 24 member 5)	SLC24A5 JSX NCKX5	500	Q71RS6;	n/a	Yes	No	No
Q76EJ3	UDP-N-acetylglucosamine/UDP-glucose/GDP-mannose transporter (Homolog of Fringe connection protein 1) (HFRC1) (SQV7-like protein) (SQV7L) (Solute carrier family 35 member D2) (UDP-galactose transporter-related protein 8) (UGTrel8)	SLC35D2 HFRC UGTREL8	337	Q76EJ3;	n/a	Yes	No	No
Q76MJ5	Serine/threonine-protein kinase/endoribonuclease IRE2 (Endoplasmic reticulum-to-nucleus signaling 2) (Inositol-requiring protein 2) (hIRE2p) (Ire1-beta) (IRE1b) [Includes: Serine/threonine-protein kinase (EC 2.7.11.1); Endoribonuclease (EC 3.1.26.-)]	ERN2 IRE2	926	Q76MJ5;	n/a	Yes	No	No
Q7L4S7	Protein ARMCX6	ARMCX6	300	Q7L4S7;	n/a	Yes	No	No
Q7L5A8	Fatty acid 2-hydroxylase (EC 1.14.18.-) (Fatty acid alpha-hydroxylase) (Fatty acid hydroxylase domain-containing protein 1)	FA2H FAAH FAXDC1	372	Q7L5A8;	n/a	Yes	No	No
Q7L5N7	Lysophosphatidylcholine acyltransferase 2 (LPC acyltransferase 2) (LPCAT-2) (LysoPC acyltransferase 2) (EC 2.3.1.23) (1-acylglycerol-3-phosphate O-acyltransferase 11) (1-AGP acyltransferase 11) (1-AGPAT 11) (EC 2.3.1.51) (1-acylglycerophosphocholine O-acyltransferase) (1-alkenylglycerophosphocholine O-acyltransferase) (EC 2.3.1.25) (1-alkylglycerophosphocholine O-acetyltransferase) (EC 2.3.1.67) …	LPCAT2 AGPAT11 AYTL1	544	Q7L5N7;	n/a	Yes	No	No
Q7Z434	Mitochondrial antiviral-signaling protein (MAVS) (CARD adapter inducing interferon beta) (Cardif) (Interferon beta promoter stimulator protein 1) (IPS-1) (Putative NF-kappa-B-activating protein 031N) (Virus-induced-signaling adapter) (VISA)	MAVS IPS1 KIAA1271 VISA	540	Q7Z434;	2MS7;2MS8;2VGQ;3J6C;3J6J;3RC5;4P4H;4Z8M;5JEK;7DNI;	Yes	No	No
Q7Z5J8	Ankyrin and armadillo repeat-containing protein	ANKAR	1434	Q7Z5J8;	n/a	Yes	No	No
Q8IU89	Ceramide synthase 3 (CerS3) (Dihydroceramide synthase 3) (LAG1 longevity assurance homolog 3) (Sphingosine N-acyltransferase CERS3) (EC 2.3.1.24) (Ultra-long-chain ceramide synthase CERS3) (EC 2.3.1.298) (Very-long-chain ceramide synthase CERS3) (EC 2.3.1.297)	CERS3 LASS3	383	Q8IU89;	n/a	Yes	No	No
Q8IVW8	Sphingosine-1-phosphate transporter SPNS2 (Protein spinster homolog 2)	SPNS2	549	Q8IVW8;	n/a	Yes	No	No
Q8IWX5	Sphingosine-1-phosphate phosphatase 2 (SPPase2) (Spp2) (hSPP2) (EC 3.1.3.-) (Sphingosine-1-phosphatase 2)	SGPP2	399	Q8IWX5;	n/a	Yes	No	No
Q8IXM6	Nurim (Nuclear envelope membrane protein) (Nuclear rim protein)	NRM NRM29 UNQ555/PRO1112	262	Q8IXM6;	n/a	Yes	No	No
Q8IXU6	Solute carrier family 35 member F2	SLC35F2	374	Q8IXU6;	n/a	Yes	No	No
Q8IY26	Polyisoprenoid diphosphate/phosphate phosphohydrolase PLPP6 (EC 3.1.3.-) (EC 3.6.1.-) (EC 3.6.1.68) (Lipid phosphatase-related protein-B) (LPRP-B) (PA-PSP) (Phosphatidic acid phosphatase type 2 domain-containing protein 2) (PPAP2 domain-containing protein 2) (Phospholipid phosphatase 6) (Presqualene diphosphate phosphatase) (Type 1 polyisoprenoid diphosphate phosphatase)	PLPP6 PDP1 PPAPDC2	295	Q8IY26;	n/a	Yes	No	No
Q8IZU8	Dermatan-sulfate epimerase-like protein (EC 5.1.-.-)	DSEL C18orf4 NCAG1	1212	Q8IZU8;	n/a	Yes	No	No
Q8N118	Cytochrome P450 4X1 (EC 1.14.14.-) (CYPIVX1)	CYP4X1 UNQ1929/PRO4404	509	Q8N118;	n/a	Yes	No	No
Q8N1S5	Zinc transporter ZIP11 (Solute carrier family 39 member 11) (Zrt- and Irt-like protein 11) (ZIP-11)	SLC39A11 C17orf26 ZIP11	342	Q8N1S5;	n/a	Yes	No	No
Q8N205	Nesprin-4 (KASH domain-containing protein 4) (KASH4) (Nuclear envelope spectrin repeat protein 4)	SYNE4 C19orf46	404	Q8N205;	6R16;6WMD;	Yes	No	No
Q8N394	Protein O-mannosyl-transferase TMTC2 (EC 2.4.1.109) (Transmembrane and TPR repeat-containing protein 2)	TMTC2	836	Q8N394;	n/a	Yes	No	No
Q8N413	Solute carrier family 25 member 45	SLC25A45	288	Q8N413;	n/a	Yes	No	No
Q8N4S7	Progestin and adipoQ receptor family member 4 (Progestin and adipoQ receptor family member IV)	PAQR4	273	Q8N4S7;	n/a	Yes	No	No
Q8N4W6	DnaJ homolog subfamily C member 22	DNAJC22	341	Q8N4W6;	n/a	Yes	No	No
Q8N755	Solute carrier family 66 member 3 (PQ-loop repeat-containing protein 3)	SLC66A3 C2orf22 PQLC3	202	Q8N755;	n/a	Yes	No	No
Q8N8R3	Mitochondrial basic amino acids transporter (Carnitine/acylcarnitine translocase-like) (CACT-like) (Mitochondrial carnitine/acylcarnitine carrier protein CACL) (Mitochondrial ornithine transporter 3) (Solute carrier family 25 member 29)	SLC25A29 C14orf69 ORNT3	303	Q8N8R3;	n/a	Yes	No	No
Q8N9M5	Transmembrane protein 102 (Common beta-chain associated protein) (CBAP)	TMEM102	508	Q8N9M5;	n/a	Yes	No	No
Q8NBM4	Ubiquitin-associated domain-containing protein 2 (UBA domain-containing protein 2) (Phosphoglycerate dehydrogenase-like protein 1)	UBAC2 PHGDHL1 PSEC0110	344	Q8NBM4;	n/a	Yes	No	No
Q8NCR9	Clarin-3 (Transmembrane protein 12) (Usher syndrome type-3A-like protein 1)	CLRN3 TMEM12 USH3AL1	226	Q8NCR9;	n/a	Yes	No	No
Q8NE86	Calcium uniporter protein, mitochondrial (HsMCU) (Coiled-coil domain-containing protein 109A)	MCU C10orf42 CCDC109A	351	Q8NE86;	4XSJ;4XTB;5BZ6;5KUE;5KUG;5KUI;5KUJ;6JG0;6K7X;6K7Y;6KVX;6O58;6O5B;6WDN;6WDO;6XJV;6XJX;	Yes	No	No
Q8NF37	Lysophosphatidylcholine acyltransferase 1 (LPC acyltransferase 1) (LPCAT-1) (LysoPC acyltransferase 1) (EC 2.3.1.23) (1-acylglycerol-3-phosphate O-acyltransferase) (EC 2.3.1.51) (1-acylglycerophosphocholine O-acyltransferase) (1-alkenylglycerophosphocholine O-acyltransferase) (EC 2.3.1.25) (1-alkylglycerophosphocholine O-acetyltransferase) (EC 2.3.1.67) (Acetyl-CoA:lyso-platelet-activating factor…	LPCAT1 AYTL2 PFAAP3	534	Q8NF37;	n/a	Yes	No	No
Q8TAA9	Vang-like protein 1 (Loop-tail protein 2 homolog) (LPP2) (Strabismus 2) (Van Gogh-like protein 1)	VANGL1 STB2	524	Q8TAA9;	n/a	Yes	No	No
Q8TB61	Adenosine 3'-phospho 5'-phosphosulfate transporter 1 (PAPS transporter 1) (Putative MAPK-activating protein PM15) (Putative NF-kappa-B-activating protein 48) (Solute carrier family 35 member B2)	SLC35B2 PAPST1 PSEC0149	432	Q8TB61;	n/a	Yes	No	No
Q8TC26	Transmembrane protein 163	TMEM163	289	Q8TC26;	n/a	Yes	No	No
Q8TCG5	Carnitine O-palmitoyltransferase 1, brain isoform (CPT1-B) (EC 2.3.1.21) (CPT IC) (Carnitine O-palmitoyltransferase I, brain isoform) (CPTI-B) (Carnitine palmitoyltransferase 1C)	CPT1C CATL1	803	Q8TCG5;	2M76;	Yes	No	No
Q8TED4	Glucose-6-phosphate exchanger SLC37A2 (Solute carrier family 37 member 2)	SLC37A2	501	Q8TED4;	n/a	Yes	No	No
Q8WWG9	Potassium voltage-gated channel subfamily E member 4 (MinK-related peptide 3) (Minimum potassium ion channel-related peptide 3) (Potassium channel subunit beta MiRP3)	KCNE4	221	Q8WWG9;	n/a	Yes	No	No
Q8WXF7	Atlastin-1 (EC 3.6.5.-) (Brain-specific GTP-binding protein) (GTP-binding protein 3) (GBP-3) (hGBP3) (Guanine nucleotide-binding protein 3) (Spastic paraplegia 3 protein A)	ATL1 GBP3 SPG3A	558	Q8WXF7;	3Q5D;3Q5E;3QNU;3QOF;4IDN;4IDO;4IDP;4IDQ;6B9D;6B9E;6B9F;6B9G;6XJN;7OL3;	Yes	No	No
Q92903	Phosphatidate cytidylyltransferase 1 (EC 2.7.7.41) (CDP-DAG synthase 1) (CDP-DG synthase 1) (CDP-diacylglycerol synthase 1) (CDS 1) (CDP-diglyceride pyrophosphorylase 1) (CDP-diglyceride synthase 1) (CTP:phosphatidate cytidylyltransferase 1)	CDS1 CDS	461	Q92903;	n/a	Yes	No	No
Q93084	Sarcoplasmic/endoplasmic reticulum calcium ATPase 3 (SERCA3) (SR Ca(2+)-ATPase 3) (EC 7.2.2.10) (Calcium pump 3)	ATP2A3	999	Q93084;	n/a	Yes	No	No
Q969S0	UDP-xylose and UDP-N-acetylglucosamine transporter (Solute carrier family 35 member B4) (YEA4 homolog)	SLC35B4 YEA4 PSEC0055	331	Q969S0;	n/a	Yes	No	No
Q96AA3	Protein RFT1 homolog	RFT1	541	Q96AA3;	n/a	Yes	No	No
Q96BA8	Cyclic AMP-responsive element-binding protein 3-like protein 1 (cAMP-responsive element-binding protein 3-like protein 1) (Old astrocyte specifically-induced substance) (OASIS) [Cleaved into: Processed cyclic AMP-responsive element-binding protein 3-like protein 1]	CREB3L1 OASIS PSEC0238	519	Q96BA8;	n/a	Yes	No	No
Q96BI3	Gamma-secretase subunit APH-1A (APH-1a) (Aph-1alpha) (Presenilin-stabilization factor)	APH1A PSF CGI-78 UNQ579/PRO1141	265	Q96BI3;	5A63;5FN2;5FN3;5FN4;5FN5;6IDF;6IYC;6LQG;6LR4;7C9I;7D8X;	Yes	No	No
Q96CP7	TLC domain-containing protein 1 (Calfacilitin)	TLCD1	247	Q96CP7;	n/a	Yes	Yes	No
Q96D31	Calcium release-activated calcium channel protein 1 (Protein orai-1) (Transmembrane protein 142A)	ORAI1 CRACM1 TMEM142A	301	Q96D31;	2MAK;4EHQ;	Yes	No	No
Q96D96	Voltage-gated hydrogen channel 1 (Hydrogen voltage-gated channel 1) (HV1) (Voltage sensor domain-only protein)	HVCN1 VSOP UNQ578/PRO1140	273	Q96D96;	3A2A;5OQK;	Yes	No	No
Q96FX8	p53 apoptosis effector related to PMP-22 (Keratinocyte-associated protein 1) (KCP-1) (P53-induced protein PIGPC1) (Transmembrane protein THW)	PERP KCP1 KRTCAP1 PIGPC1 THW	193	Q96FX8;	n/a	Yes	No	No
Q96GC9	Vacuole membrane protein 1 (Transmembrane protein 49)	VMP1 TDC1 TMEM49 HSPC292	406	Q96GC9;	n/a	Yes	No	No
Q96HH6	Transmembrane protein 19	TMEM19	336	Q96HH6;	n/a	Yes	No	No
Q96IZ2	Androgen-dependent TFPI-regulating protein (Fatty acid esters of hydroxy fatty acids hydrolase ADTRP) (FAHFA hydrolase ADTRP) (EC 3.1.-.-)	ADTRP C6orf105	230	Q96IZ2;	n/a	Yes	No	No
Q96JQ2	Calmin (Calponin-like transmembrane domain protein)	CLMN KIAA1188	1002	Q96JQ2;	n/a	Yes	No	No
Q96JT2	Solute carrier family 45 member 3 (Prostate cancer-associated protein 6) (Prostein)	SLC45A3 PCANAP6 PRST	553	Q96JT2;	n/a	Yes	No	No
Q96MX0	CKLF-like MARVEL transmembrane domain-containing protein 3 (Chemokine-like factor superfamily member 3)	CMTM3 CKLFSF3	182	Q96MX0;	n/a	Yes	No	No
Q96NY7	Chloride intracellular channel protein 6 (Parchorin)	CLIC6 CLIC1L	704	Q96NY7;	n/a	Yes	No	No
Q96PB1	N-acetylneuraminate 9-O-acetyltransferase (EC 2.3.1.45) (CAS1 domain-containing protein 1) (Sialate O-acetyltransferase) (SOAT)	CASD1 C7orf12 Nbla04196	797	Q96PB1;	n/a	Yes	No	No
Q96Q80	Derlin-3 (Degradation in endoplasmic reticulum protein 3) (DERtrin-3) (Der1-like protein 3)	DERL3 C22orf14 DER3 LLN2	235	Q96Q80;	n/a	Yes	No	No
Q96S06	Lipase maturation factor 1 (Transmembrane protein 112)	LMF1 C16orf26 TMEM112 HMFN1876 JFP11	567	Q96S06;	n/a	Yes	No	No
Q96SN7	Protein orai-2 (CAP-binding protein complex-interacting protein 2) (Transmembrane protein 142B)	ORAI2 C7orf19 CBCIP2 TMEM142B PP1729	254	Q96SN7;	n/a	Yes	No	No
Q99442	Translocation protein SEC62 (Translocation protein 1) (TP-1) (hTP-1)	SEC62 TLOC1	399	Q99442;	7BRT;	Yes	No	No
Q9BPX6	Calcium uptake protein 1, mitochondrial (Atopy-related autoantigen CALC) (ara CALC) (Calcium-binding atopy-related autoantigen 1) (allergen Hom s 4)	MICU1 CALC CBARA1	476	Q9BPX6;	4NSC;4NSD;6K7Y;6LB7;6LB8;6LE5;6WDN;6WDO;6XJV;6XJX;6XQN;6XQO;	Yes	No	No
Q9BQB6	Vitamin K epoxide reductase complex subunit 1 (EC 1.17.4.4) (Vitamin K1 2,3-epoxide reductase subunit 1)	VKORC1 VKOR MSTP134 MSTP576 UNQ308/PRO351	163	Q9BQB6;	6WV3;6WV4;6WV5;6WV6;6WV7;6WVH;	Yes	No	No
Q9BSK0	MARVEL domain-containing protein 1	MARVELD1 MRVLDC1	173	Q9BSK0;	n/a	Yes	No	No
Q9BTX1	Nucleoporin NDC1 (hNDC1) (Transmembrane protein 48)	NDC1 TMEM48	674	Q9BTX1;	7R5K;	Yes	No	No
Q9BUM1	Glucose-6-phosphatase 3 (G-6-Pase 3) (G6Pase 3) (EC 3.1.3.9) (Glucose-6-phosphatase beta) (G6Pase-beta) (Ubiquitous glucose-6-phosphatase catalytic subunit-related protein)	G6PC3 UGRP	346	Q9BUM1;	n/a	Yes	No	No
Q9BUN8	Derlin-1 (Degradation in endoplasmic reticulum protein 1) (DERtrin-1) (Der1-like protein 1)	DERL1 DER1 UNQ243/PRO276	251	Q9BUN8;	5GLF;7CZB;	Yes	No	No
Q9BX95	Sphingosine-1-phosphate phosphatase 1 (SPPase1) (Spp1) (hSPP1) (hSPPase1) (EC 3.1.3.-) (Sphingosine-1-phosphatase 1) (Sphingosine-1-phosphate phosphohydrolase 1) (SPP-1)	SGPP1 SPP1	441	Q9BX95;	n/a	Yes	No	No
Q9H427	Potassium channel subfamily K member 15 (Acid-sensitive potassium channel protein TASK-5) (TWIK-related acid-sensitive K(+) channel 5) (Two pore potassium channel KT3.3) (Two pore K(+) channel KT3.3)	KCNK15 TASK5	330	Q9H427;	n/a	Yes	Yes	No
Q9HBI6	Cytochrome P450 4F11 (CYPIVF11) (EC 1.14.14.1) (3-hydroxy fatty acids omega-hydroxylase CYP4F11) (Docosahexaenoic acid omega-hydroxylase) (EC 1.14.14.79) (Long-chain fatty acid omega-monooxygenase) (EC 1.14.14.80) (Phylloquinone omega-hydroxylase CYP4F11) (EC 1.14.14.78)	CYP4F11	524	Q9HBI6;	n/a	Yes	No	No
Q9HC24	Protein lifeguard 4 (Golgi anti-apoptotic protein) (Protein S1R) (Transmembrane BAX inhibitor motif-containing protein 4) (Z-protein)	TMBIM4 GAAP LFG4 CGI-119	238	Q9HC24;	n/a	Yes	Yes	No
Q9HCS2	Cytochrome P450 4F12 (EC 1.14.14.1) (CYPIVF12)	CYP4F12 UNQ568/PRO1129	524	Q9HCS2;	n/a	Yes	No	No
Q9NR34	Mannosyl-oligosaccharide 1,2-alpha-mannosidase IC (EC 3.2.1.113) (HMIC) (Mannosidase alpha class 1C member 1) (Processing alpha-1,2-mannosidase IC) (Alpha-1,2-mannosidase IC)	MAN1C1 MAN1A3 MAN1C	630	Q9NR34;	n/a	Yes	No	No
Q9NV12	Transmembrane protein 140	TMEM140	185	Q9NV12;	n/a	Yes	No	No
Q9NVV0	Trimeric intracellular cation channel type B (TRIC-B) (TRICB) (Transmembrane protein 38B)	TMEM38B C9orf87	291	Q9NVV0;	n/a	Yes	No	No
Q9NWR8	Calcium uniporter regulatory subunit MCUb, mitochondrial (MCUb) (Coiled-coil domain-containing protein 109B)	MCUB CCDC109B	336	Q9NWR8;	n/a	Yes	No	No
Q9NXG6	Transmembrane prolyl 4-hydroxylase (P4H-TM) (EC 1.14.11.29) (Hypoxia-inducible factor prolyl hydroxylase 4) (HIF-PH4) (HIF-prolyl hydroxylase 4) (HPH-4)	P4HTM PH4	502	Q9NXG6;	6TP5;	Yes	No	No
Q9NXH8	Torsin-4A (Torsin family 4 member A)	TOR4A C9orf167	423	Q9NXH8;	n/a	Yes	No	No
Q9NZA1	Chloride intracellular channel protein 5	CLIC5	410	Q9NZA1;	6Y2H;	Yes	No	No
Q9NZJ7	Mitochondrial carrier homolog 1 (Presenilin-associated protein)	MTCH1 PSAP CGI-64 UNQ1871/PRO4314	389	Q9NZJ7;	n/a	Yes	No	No
Q9P035	Very-long-chain (3R)-3-hydroxyacyl-CoA dehydratase 3 (EC 4.2.1.134) (3-hydroxyacyl-CoA dehydratase 3) (HACD3) (Butyrate-induced protein 1) (B-ind1) (hB-ind1) (Protein-tyrosine phosphatase-like A domain-containing protein 1)	HACD3 BIND1 PTPLAD1	362	Q9P035;	n/a	Yes	No	No
Q9P0B6	Coiled-coil domain-containing protein 167	CCDC167 C6orf129 HSPC265	97	Q9P0B6;	n/a	Yes	No	No
Q9P291	Armadillo repeat-containing X-linked protein 1 (ARM protein lost in epithelial cancers on chromosome X 1) (Protein ALEX1)	ARMCX1 ALEX1 AD032	453	Q9P291;	n/a	Yes	No	No
Q9P2P1	Protein NYNRIN (NYN domain and retroviral integrase catalytic domain-containing protein) (Protein cousin of GIN1)	NYNRIN CGIN1 KIAA1305	1898	Q9P2P1;	n/a	Yes	No	No
Q9UBM7	7-dehydrocholesterol reductase (7-DHC reductase) (EC 1.3.1.21) (Delta7-sterol reductase) (Sterol Delta(7)-reductase) (Sterol reductase SR-2)	DHCR7 D7SR	475	Q9UBM7;	n/a	Yes	No	No
Q9UBX3	Mitochondrial dicarboxylate carrier (DIC) (Solute carrier family 25 member 10)	SLC25A10 DIC	287	Q9UBX3;	n/a	Yes	No	No
Q9UDX5	Mitochondrial fission process protein 1 (Mitochondrial 18 kDa protein) (MTP18)	MTFP1 MTP18 HSPC242 My022	166	Q9UDX5;	n/a	Yes	No	No
Q9UIJ5	Palmitoyltransferase ZDHHC2 (EC 2.3.1.225) (Acyltransferase ZDHHC2) (EC 2.3.1.-) (Reduced expression associated with metastasis protein) (Ream) (Reduced expression in cancer protein) (Rec) (Zinc finger DHHC domain-containing protein 2) (DHHC-2) (Zinc finger protein 372)	ZDHHC2 REAM REC ZNF372	367	Q9UIJ5;	n/a	Yes	No	No
Q9UJS0	Electrogenic aspartate/glutamate antiporter SLC25A13, mitochondrial (Calcium-binding mitochondrial carrier protein Aralar2) (ARALAR-related gene 2) (ARALAR2) (Citrin) (Mitochondrial aspartate glutamate carrier 2) (Solute carrier family 25 member 13)	SLC25A13	675	Q9UJS0;	4P5W;	Yes	No	No
Q9UL01	Dermatan-sulfate epimerase (DS epimerase) (EC 5.1.3.19) (Chondroitin-glucuronate 5-epimerase) (Squamous cell carcinoma antigen recognized by T-cells 2) (SART-2)	DSE SART2	958	Q9UL01;	6HZN;	Yes	No	No
Q9ULK5	Vang-like protein 2 (Loop-tail protein 1 homolog) (Strabismus 1) (Van Gogh-like protein 2)	VANGL2 KIAA1215 STB1	521	Q9ULK5;	6XA6;6XA7;6XA8;	Yes	No	No
Q9UM00	Calcium load-activated calcium channel (CLAC channel) (Transmembrane and coiled-coil domain-containing protein 1) (Transmembrane and coiled-coil domains protein 4) (Xenogeneic cross-immune protein PCIA3)	TMCO1 TMCC4 PNAS-10 PNAS-136 UNQ151/PRO177	239	Q9UM00;	6W6L;	Yes	Yes	No
Q9Y228	TRAF3-interacting JNK-activating modulator (TRAF3-interacting protein 3)	TRAF3IP3 T3JAM	551	Q9Y228;	n/a	Yes	No	No
Q9Y5T4	DnaJ homolog subfamily C member 15 (Cell growth-inhibiting gene 22 protein) (Methylation-controlled J protein) (MCJ)	DNAJC15 DNAJD1 GIG22 HSD18	150	Q9Y5T4;	n/a	Yes	No	No
Q9Y619	Mitochondrial ornithine transporter 1 (Solute carrier family 25 member 15)	SLC25A15 ORC1 ORNT1 SP1855	301	Q9Y619;	n/a	Yes	No	No
Q9Y693	LHFPL tetraspan subfamily member 6 protein (Lipoma HMGIC fusion partner)	LHFPL6 LHFP	200	Q9Y693;	n/a	Yes	No	No
Q9Y6C9	Mitochondrial carrier homolog 2 (Met-induced mitochondrial protein)	MTCH2 MIMP HSPC032	303	Q9Y6C9;	n/a	Yes	No	No
Q14204	Cytoplasmic dynein 1 heavy chain 1 (Cytoplasmic dynein heavy chain 1) (Dynein heavy chain, cytosolic)	DYNC1H1 DHC1 DNCH1 DNCL DNECL DYHC KIAA0325	4646	n/a	5NUG;5OWO;6F1T;6F1U;6F1V;6F1Y;6F38;6F3A;7Z8F;7Z8G;7Z8H;7Z8I;7Z8J;7Z8K;7Z8L;	No	No	No
Q9NR48	Histone-lysine N-methyltransferase ASH1L (EC 2.1.1.359) (EC 2.1.1.367) (ASH1-like protein) (huASH1) (Absent small and homeotic disks protein 1 homolog) (Lysine N-methyltransferase 2H)	ASH1L KIAA1420 KMT2H	2969	n/a	3MQM;3OPE;4YNM;4YNP;4YPA;4YPE;4YPU;6AGO;6INE;6WZW;6X0P;	No	No	No
Q12830	Nucleosome-remodeling factor subunit BPTF (Bromodomain and PHD finger-containing transcription factor) (Fetal Alz-50 clone 1 protein) (Fetal Alzheimer antigen)	BPTF FAC1 FALZ	3046	n/a	2F6J;2F6N;2FSA;2FUI;2FUU;2RI7;3QZS;3QZT;3QZV;3UV2;5H6Y;5R4G;5R4H;5R4I;5R4J;5R4K;5R4L;5R4M;5R4N;5R4O;6AZE;6LU5;6LU6;7DMY;7DN4;7JT4;7K6R;7K6S;7KDW;7KDZ;7LP0;7LPK;7LRK;7LRO;7M2E;7RWN;7RWO;7RWP;7RWQ;8AG2;	No	No	No
Q12802	A-kinase anchor protein 13 (AKAP-13) (AKAP-Lbc) (Breast cancer nuclear receptor-binding auxiliary protein) (Guanine nucleotide exchange factor Lbc) (Human thyroid-anchoring protein 31) (Lymphoid blast crisis oncogene) (LBC oncogene) (Non-oncogenic Rho GTPase-specific GTP exchange factor) (Protein kinase A-anchoring protein 13) (PRKA13) (p47)	AKAP13 BRX HT31 LBC	2813	n/a	2DRN;2LG1;4D0N;4D0O;6BCA;	No	No	No
O75962	Triple functional domain protein (EC 2.7.11.1) (PTPRF-interacting protein)	TRIO	3097	n/a	1NTY;2NZ8;6D8Z;7SJ4;	No	No	No
P21359	Neurofibromin (Neurofibromatosis-related protein NF-1) [Cleaved into: Neurofibromin truncated]	NF1	2839	n/a	1NF1;2D4Q;2E2X;3P7Z;3PEG;3PG7;6OB2;6OB3;6V65;6V6F;7MOC;7MP5;7MP6;7PGP;7PGR;7PGS;7PGT;7PGU;7R03;7R04;	No	No	No
Q15149	Plectin (PCN) (PLTN) (Hemidesmosomal protein 1) (HD1) (Plectin-1)	PLEC PLEC1	4684	n/a	1MB8;2N03;2ODU;2ODV;3F7P;3PDY;3PE0;4GDO;4Q58;4Q59;5J1F;5J1G;5J1H;5J1I;	No	No	No
A0AVK6	Transcription factor E2F8 (E2F-8)	E2F8	867	A0AVK6;	4YO2;	No	No	No
A1A4S6	Rho GTPase-activating protein 10 (GTPase regulator associated with focal adhesion kinase 2) (Graf-related protein 2) (Rho-type GTPase-activating protein 10)	ARHGAP10 GRAF2	786	A1A4S6;	2MIO;	No	No	No
A1A5D9	BICD family-like cargo adapter 2 (Bicaudal D-related protein 2) (BICD-related protein 2) (BICDR-2) (Coiled-coil domain-containing protein 64B)	BICDL2 BICDR2 CCDC64B	508	A1A5D9;	n/a	No	No	No
A1L390	Pleckstrin homology domain-containing family G member 3 (PH domain-containing family G member 3)	PLEKHG3 KIAA0599	1219	A1L390;	n/a	No	No	No
A2A288	Probable ribonuclease ZC3H12D (EC 3.1.-.-) (MCP-induced protein 4) (Transformed follicular lymphoma) (Zinc finger CCCH domain-containing protein 12D) (p34)	ZC3H12D C6orf95 MCPIP4 TFL	527	A2A288;	n/a	No	No	No
A2A3L6	Tetratricopeptide repeat protein 24 (TPR repeat protein 24)	TTC24	582	A2A3L6;	n/a	No	No	No
A4D1B5	Gamma-secretase-activating protein (GSAP) (Protein pigeon homolog) [Cleaved into: Gamma-secretase-activating protein 16 kDa C-terminal form (GSAP-16K)]	GSAP PION	854	A4D1B5;	n/a	No	No	No
A6NC98	Coiled-coil domain-containing protein 88B (Brain leucine zipper domain-containing protein) (Gipie) (Hook-related protein 3) (HkRP3)	CCDC88B BRLZ	1476	A6NC98;	n/a	No	No	No
A6NCC3	Golgin subfamily A member 8O	GOLGA8O	632	A6NCC3;	n/a	No	No	No
A6NEL2	Ankyrin repeat domain-containing protein SOWAHB (Ankyrin repeat domain-containing protein 56) (Protein sosondowah homolog B)	SOWAHB ANKRD56	793	A6NEL2;	n/a	No	No	No
A6NGR9	Maestro heat-like repeat-containing protein family member 6	MROH6 C8orf73	719	A6NGR9;	n/a	No	No	No
A6NHC0	Calpain-8 (EC 3.4.22.53) (New calpain 2) (nCL-2) (Stomach-specific M-type calpain)	CAPN8 NCL2	703	A6NHC0;	2NQA;	No	No	No
A6NI28	Rho GTPase-activating protein 42 (Rho GTPase-activating protein 10-like) (Rho-type GTPase-activating protein 42)	ARHGAP42 GRAF3 TMEM133	874	A6NI28;	n/a	No	No	No
A6NI79	Coiled-coil domain-containing protein 69	CCDC69	296	A6NI79;	n/a	No	No	No
A6NIE6	Putative RRN3-like protein RRN3P2 (RNA polymerase I transcription factor homolog pseudogene 2)	RRN3P2	340	A6NIE6;	n/a	No	No	No
A6NIY4	Speedy protein E5	SPDYE5	402	A6NIY4;	n/a	No	No	No
A6NJ46	Homeobox protein Nkx-6.3	NKX6-3	265	A6NJ46;	n/a	No	No	No
A6NMY6	Putative annexin A2-like protein (Annexin A2 pseudogene 2) (Lipocortin II pseudogene)	ANXA2P2 ANX2L2 ANX2P2 LPC2B	339	A6NMY6;	n/a	No	No	No
A6NNV3	Putative speedy protein E16	SPDYE16	312	A6NNV3;	n/a	No	No	No
A7KAX9	Rho GTPase-activating protein 32 (Brain-specific Rho GTPase-activating protein) (GAB-associated Cdc42/Rac GTPase-activating protein) (GC-GAP) (GTPase regulator interacting with TrkA) (Rho-type GTPase-activating protein 32) (Rho/Cdc42/Rac GTPase-activating protein RICS) (RhoGAP involved in the beta-catenin-N-cadherin and NMDA receptor signaling) (p200RhoGAP) (p250GAP)	ARHGAP32 GRIT KIAA0712 RICS	2087	A7KAX9;	3IUG;	No	No	No
A8K2U0	Alpha-2-macroglobulin-like protein 1 (C3 and PZP-like alpha-2-macroglobulin domain-containing protein 9)	A2ML1 CPAMD9	1454	A8K2U0;	7Q1Y;7Q5Z;7Q60;7Q61;7Q62;	No	No	No
A8MTJ6	Forkhead box protein I3	FOXI3	420	A8MTJ6;	n/a	No	No	No
A8MTY0	Zinc finger protein 724	ZNF724 ZNF724P	619	A8MTY0;	n/a	No	No	No
B1AK53	Espin (Autosomal recessive deafness type 36 protein) (Ectoplasmic specialization protein)	ESPN DFNB36 LP2654	854	B1AK53;	n/a	No	No	No
B9A6J9	TBC1 domain family member 3L	TBC1D3L	549	B9A6J9;	n/a	No	No	No
C9JE40	Protein PAT1 homolog 2 (PAT1-like protein 2) (Protein PAT1 homolog a) (Pat1a) (hPat1a)	PATL2	543	C9JE40;	n/a	No	No	No
D6RF30	Golgin subfamily A member 8K	GOLGA8K	630	D6RF30;	n/a	No	No	No
E5RJM6	Ankyrin repeat domain-containing protein 65	ANKRD65	399	E5RJM6;	n/a	No	No	No
E9PJI5	Nuclear pore complex-interacting protein family member A7	NPIPA7	369	E9PJI5;	n/a	No	No	No
F5GYI3	Ubiquitin-associated protein 1-like (UBAP-1L)	UBAP1L	381	F5GYI3;	n/a	No	No	No
F8WBI6	Golgin subfamily A member 8N	GOLGA8N	632	F8WBI6;	n/a	No	No	No
H3BSY2	Golgin subfamily A member 8M	GOLGA8M	632	H3BSY2;	n/a	No	No	No
H3BV12	Golgin subfamily A member 8Q	GOLGA8Q	632	H3BV12;	n/a	No	No	No
I6L899	Golgin subfamily A member 8R	GOLGA8R	631	I6L899;	n/a	No	No	No
O00221	NF-kappa-B inhibitor epsilon (NF-kappa-BIE) (I-kappa-B-epsilon) (IkB-E) (IkB-epsilon) (IkappaBepsilon)	NFKBIE IKBE	500	O00221;	n/a	No	No	No
O00300	Tumor necrosis factor receptor superfamily member 11B (Osteoclastogenesis inhibitory factor) (Osteoprotegerin)	TNFRSF11B OCIF OPG	401	O00300;	3URF;	No	No	No
O00327	Basic helix-loop-helix ARNT-like protein 1 (Aryl hydrocarbon receptor nuclear translocator-like protein 1) (Basic-helix-loop-helix-PAS protein MOP3) (Brain and muscle ARNT-like 1) (Class E basic helix-loop-helix protein 5) (bHLHe5) (Member of PAS protein 3) (PAS domain-containing protein 3) (bHLH-PAS protein JAP3)	BMAL1 ARNTL BHLHE5 MOP3 PASD3	626	O00327;	4H10;	No	No	No
O00329	Phosphatidylinositol 4,5-bisphosphate 3-kinase catalytic subunit delta isoform (PI3-kinase subunit delta) (PI3K-delta) (PI3Kdelta) (PtdIns-3-kinase subunit delta) (EC 2.7.1.137) (EC 2.7.1.153) (Phosphatidylinositol 4,5-bisphosphate 3-kinase 110 kDa catalytic subunit delta) (PtdIns-3-kinase subunit p110-delta) (p110delta)	PIK3CD	1044	O00329;	5DXU;5M6U;5T8F;5UBT;5VLR;6G6W;6OCO;6OCU;6PYR;6PYU;7JIS;7LM2;7LQ1;	No	No	No
O00330	Pyruvate dehydrogenase protein X component, mitochondrial (Dihydrolipoamide dehydrogenase-binding protein of pyruvate dehydrogenase complex) (E3-binding protein) (E3BP) (Lipoyl-containing pyruvate dehydrogenase complex component X) (proX)	PDHX PDX1	501	O00330;	1ZY8;2DNC;2F5Z;2F60;6H60;	No	No	No
O00358	Forkhead box protein E1 (Forkhead box protein E2) (Forkhead-related protein FKHL15) (HFKH4) (HNF-3/fork head-like protein 5) (HFKL5) (Thyroid transcription factor 2) (TTF-2)	FOXE1 FKHL15 FOXE2 TITF2 TTF2	373	O00358;	n/a	No	No	No
O00409	Forkhead box protein N3 (Checkpoint suppressor 1)	FOXN3 C14orf116 CHES1	490	O00409;	6NCE;6NCM;	No	No	No
O00470	Homeobox protein Meis1	MEIS1	390	O00470;	4XRS;5EGO;	No	No	No
O00716	Transcription factor E2F3 (E2F-3)	E2F3 KIAA0075	465	O00716;	n/a	No	No	No
O00750	Phosphatidylinositol 4-phosphate 3-kinase C2 domain-containing subunit beta (PI3K-C2-beta) (PtdIns-3-kinase C2 subunit beta) (EC 2.7.1.137) (EC 2.7.1.154) (C2-PI3K) (Phosphoinositide 3-kinase-C2-beta)	PIK3C2B	1634	O00750;	n/a	No	No	No
O00755	Protein Wnt-7a	WNT7A	349	O00755;	4UZQ;	No	No	No
O14503	Class E basic helix-loop-helix protein 40 (bHLHe40) (Class B basic helix-loop-helix protein 2) (bHLHb2) (Differentially expressed in chondrocytes protein 1) (DEC1) (Enhancer-of-split and hairy-related protein 2) (SHARP-2) (Stimulated by retinoic acid gene 13 protein)	BHLHE40 BHLHB2 DEC1 SHARP2 STRA13	412	O14503;	n/a	No	No	No
O14508	Suppressor of cytokine signaling 2 (SOCS-2) (Cytokine-inducible SH2 protein 2) (CIS-2) (STAT-induced STAT inhibitor 2) (SSI-2)	SOCS2 CIS2 SSI2 STATI2	198	O14508;	2C9W;4JGH;5BO4;6I4X;6I5J;6I5N;7M6T;	No	No	No
O14519	Cyclin-dependent kinase 2-associated protein 1 (CDK2-associated protein 1) (Deleted in oral cancer 1) (DOC-1) (Putative oral cancer suppressor)	CDK2AP1 CDKAP1 DOC1	115	O14519;	2KW6;	No	No	No
O14526	F-BAR domain only protein 1	FCHO1 KIAA0290	889	O14526;	7OHI;	No	No	No
O14543	Suppressor of cytokine signaling 3 (SOCS-3) (Cytokine-inducible SH2 protein 3) (CIS-3) (STAT-induced STAT inhibitor 3) (SSI-3)	SOCS3 CIS3 SSI3	225	O14543;	n/a	No	No	No
O14561	Acyl carrier protein, mitochondrial (ACP) (CI-SDAP) (NADH-ubiquinone oxidoreductase 9.6 kDa subunit)	NDUFAB1	156	O14561;	2DNW;5OOL;5OOM;5XTB;5XTC;5XTD;5XTH;5XTI;6ODD;7A5H;7A5J;7O9K;7O9M;7ODR;7ODS;7ODT;7OF0;7OF2;7OF3;7OF5;7OF7;7OI6;7OI7;7OI8;7OI9;7OIC;7OID;7OIE;7PD3;7PO4;7QH6;7QH7;	No	No	No
O14607	Histone demethylase UTY (EC 1.14.11.68) (Ubiquitously-transcribed TPR protein on the Y chromosome) (Ubiquitously-transcribed Y chromosome tetratricopeptide repeat protein) ([histone H3]-trimethyl-L-lysine(27) demethylase UTY)	UTY KDM6C	1347	O14607;	3ZLI;3ZPO;4UF0;5A1L;5FXV;5FXW;5FXX;5FXZ;5FY0;5FY1;5FY7;5FYM;	No	No	No
O14639	Actin-binding LIM protein 1 (abLIM-1) (Actin-binding LIM protein family member 1) (Actin-binding double zinc finger protein) (LIMAB1) (Limatin)	ABLIM1 ABLIM KIAA0059 LIMAB1	778	O14639;	n/a	No	No	No
O14682	Ectoderm-neural cortex protein 1 (ENC-1) (Kelch-like protein 37) (Nuclear matrix protein NRP/B) (p53-induced gene 10 protein)	ENC1 KLHL37 NRPB PIG10	589	O14682;	n/a	No	No	No
O14715	RANBP2-like and GRIP domain-containing protein 8 (Ran-binding protein 2-like 3) (RanBP2-like 3) (RanBP2L3)	RGPD8 RANBP2ALPHA RANBP2L1 RANBP2L3	1765	O14715;	n/a	No	No	No
O14777	Kinetochore protein NDC80 homolog (Highly expressed in cancer protein) (Kinetochore protein Hec1) (HsHec1) (Kinetochore-associated protein 2) (Retinoblastoma-associated protein HEC)	NDC80 HEC HEC1 KNTC2	642	O14777;	2IGP;2VE7;3IZ0;	No	No	No
O14782	Kinesin-like protein KIF3C	KIF3C	793	O14782;	3B6V;	No	No	No
O14813	Paired mesoderm homeobox protein 2A (ARIX1 homeodomain protein) (Aristaless homeobox protein homolog) (Paired-like homeobox 2A)	PHOX2A ARIX PMX2A	284	O14813;	n/a	No	No	No
O14815	Calpain-9 (EC 3.4.22.-) (Digestive tract-specific calpain) (New calpain 4) (nCL-4) (Protein CG36)	CAPN9 NCL4	690	O14815;	1ZIV;2P0R;	No	No	No
O14862	Interferon-inducible protein AIM2 (Absent in melanoma 2)	AIM2	343	O14862;	3RN2;3RN5;3VD8;4O7Q;6MB2;7K3R;	No	No	No
O14879	Interferon-induced protein with tetratricopeptide repeats 3 (IFIT-3) (CIG49) (ISG-60) (Interferon-induced 60 kDa protein) (IFI-60K) (Interferon-induced protein with tetratricopeptide repeats 4) (IFIT-4) (Retinoic acid-induced gene G protein) (P60) (RIG-G)	IFIT3 CIG-49 IFI60 IFIT4 ISG60	490	O14879;	6C6K;	No	No	No
O14896	Interferon regulatory factor 6 (IRF-6)	IRF6	467	O14896;	n/a	No	No	No
O14908	PDZ domain-containing protein GIPC1 (GAIP C-terminus-interacting protein) (RGS-GAIP-interacting protein) (RGS19-interacting protein 1) (Synectin) (Tax interaction protein 2) (TIP-2)	GIPC1 C19orf3 GIPC RGS19IP1	333	O14908;	n/a	No	No	No
O14929	Histone acetyltransferase type B catalytic subunit (EC 2.3.1.48) (Histone acetyltransferase 1)	HAT1 KAT1	419	O14929;	2P0W;6VO5;	No	No	No
O14936	Peripheral plasma membrane protein CASK (hCASK) (EC 2.7.11.1) (Calcium/calmodulin-dependent serine protein kinase) (Protein lin-2 homolog)	CASK LIN2	926	O14936;	1KGD;1KWA;1ZL8;3C0G;3C0H;3C0I;3MFR;3MFS;3MFT;3MFU;3TAC;6KMH;7OAI;7OAJ;7OAK;7OAL;	No	No	No
O14948	Transcription factor EC (TFE-C) (Class E basic helix-loop-helix protein 34) (bHLHe34) (Transcription factor EC-like) (hTFEC-L)	TFEC BHLHE34 TCFEC TFECL	347	O14948;	n/a	No	No	No
O14950	Myosin regulatory light chain 12B (MLC-2A) (MLC-2) (Myosin regulatory light chain 2-B, smooth muscle isoform) (Myosin regulatory light chain 20 kDa) (MLC20) (Myosin regulatory light chain MRLC2) (SHUJUN-1)	MYL12B MRLC2 MYLC2B	172	O14950;	n/a	No	No	No
O15020	Spectrin beta chain, non-erythrocytic 2 (Beta-III spectrin) (Spinocerebellar ataxia 5 protein)	SPTBN2 KIAA0302 SCA5	2390	O15020;	1WJM;1WYQ;6ANU;	No	No	No
O15123	Angiopoietin-2 (ANG-2)	ANGPT2	496	O15123;	1Z3S;1Z3U;2GY7;4JZC;4ZFG;	No	No	No
O15145	Actin-related protein 2/3 complex subunit 3 (Arp2/3 complex 21 kDa subunit) (p21-ARC)	ARPC3 ARC21	178	O15145;	6UHC;6YW6;6YW7;	No	No	No
O15151	Protein Mdm4 (Double minute 4 protein) (Mdm2-like p53-binding protein) (Protein Mdmx) (p53-binding protein Mdm4)	MDM4 MDMX	490	O15151;	2CR8;2MWY;2N06;2N0U;2N0W;2N14;2VJE;2VJF;2VYR;3DAB;3EQY;3FDO;3FE7;3FEA;3JZO;3JZP;3JZQ;3LBJ;3MQR;3U15;4RXZ;5MNJ;5UML;5VK1;6Q9Q;6Q9S;6Q9U;6Q9W;6Q9Y;6YR5;6YR7;7C3Q;7C3Y;7C44;7EL4;7KJN;7MLA;	No	No	No
O15164	Transcription intermediary factor 1-alpha (TIF1-alpha) (EC 2.3.2.27) (E3 ubiquitin-protein ligase TRIM24) (RING finger protein 82) (RING-type E3 ubiquitin transferase TIF1-alpha) (Tripartite motif-containing protein 24)	TRIM24 RNF82 TIF1 TIF1A	1050	O15164;	2YYN;3O33;3O34;3O35;3O36;3O37;4YAB;4YAD;4YAT;4YAX;4YBM;4YBS;4YBT;4YC9;4ZQL;5H1T;5H1U;5H1V;7B9X;	No	No	No
O15195	Villin-like protein	VILL	856	O15195;	n/a	No	No	No
O15347	High mobility group protein B3 (High mobility group protein 2a) (HMG-2a) (High mobility group protein 4) (HMG-4)	HMGB3 HMG2A HMG4	200	O15347;	2EQZ;2YQI;	No	No	No
O15405	TOX high mobility group box family member 3 (CAG trinucleotide repeat-containing gene F9 protein) (Trinucleotide repeat-containing gene 9 protein)	TOX3 CAGF9 TNRC9	576	O15405;	n/a	No	No	No
O15492	Regulator of G-protein signaling 16 (RGS16) (A28-RGS14P) (Retinal-specific RGS) (RGS-r) (hRGS-r) (Retinally abundant regulator of G-protein signaling)	RGS16 RGSR	202	O15492;	2BT2;2IK8;	No	No	No
O15511	Actin-related protein 2/3 complex subunit 5 (Arp2/3 complex 16 kDa subunit) (p16-ARC)	ARPC5 ARC16	151	O15511;	6UHC;6YW7;	No	No	No
O15534	Period circadian protein homolog 1 (hPER1) (Circadian clock protein PERIOD 1) (Circadian pacemaker protein Rigui)	PER1 KIAA0482 PER RIGUI	1290	O15534;	n/a	No	No	No
O15539	Regulator of G-protein signaling 5 (RGS5)	RGS5	181	O15539;	2CRP;	No	No	No
O15553	Pyrin (Marenostrin)	MEFV MEF TRIM20	781	O15553;	2MPC;2WL1;4CG4;	No	No	No
O43150	Arf-GAP with SH3 domain, ANK repeat and PH domain-containing protein 2 (Development and differentiation-enhancing factor 2) (Paxillin-associated protein with ARF GAP activity 3) (PAG3) (Pyk2 C-terminus-associated protein) (PAP)	ASAP2 DDEF2 KIAA0400	1006	O43150;	n/a	No	No	No
O43187	Interleukin-1 receptor-associated kinase-like 2 (IRAK-2)	IRAK2	625	O43187;	3MOP;	No	No	No
O43272	Proline dehydrogenase 1, mitochondrial (EC 1.5.5.2) (Proline oxidase) (Proline oxidase 2) (p53-induced gene 6 protein)	PRODH PIG6 POX2 PRODH2	600	O43272;	n/a	No	No	No
O43295	SLIT-ROBO Rho GTPase-activating protein 3 (srGAP3) (Mental disorder-associated GAP) (Rho GTPase-activating protein 14) (WAVE-associated Rac GTPase-activating protein) (WRP)	SRGAP3 ARHGAP14 KIAA0411 KIAA1156 MEGAP SRGAP2	1099	O43295;	n/a	No	No	No
O43296	Zinc finger protein 264	ZNF264 KIAA0412	627	O43296;	n/a	No	No	No
O43307	Rho guanine nucleotide exchange factor 9 (Collybistin) (PEM-2 homolog) (Rac/Cdc42 guanine nucleotide exchange factor 9)	ARHGEF9 ARHDH9 KIAA0424	516	O43307;	2YSQ;	No	No	No
O43312	Protein MTSS 1 (Metastasis suppressor YGL-1) (Metastasis suppressor protein 1) (Missing in metastasis protein)	MTSS1 KIAA0429 MIM	755	O43312;	2D1K;	No	No	No
O43365	Homeobox protein Hox-A3 (Homeobox protein Hox-1E)	HOXA3 HOX1E	443	O43365;	n/a	No	No	No
O43586	Proline-serine-threonine phosphatase-interacting protein 1 (PEST phosphatase-interacting protein 1) (CD2-binding protein 1) (H-PIP)	PSTPIP1 CD2BP1	416	O43586;	2DIL;7AAL;7AAM;7AAN;	No	No	No
O43638	Forkhead box protein S1 (Forkhead-like 18 protein) (Forkhead-related transcription factor 10) (FREAC-10)	FOXS1 FKHL18 FREAC10	330	O43638;	n/a	No	No	No
O43663	Protein regulator of cytokinesis 1	PRC1	620	O43663;	3NRX;3NRY;4L3I;4L6Y;5KMG;7VBG;	No	No	No
O43665	Regulator of G-protein signaling 10 (RGS10)	RGS10	181	O43665;	2DLR;2I59;2IHB;	No	No	No
O43683	Mitotic checkpoint serine/threonine-protein kinase BUB1 (hBUB1) (EC 2.7.11.1) (BUB1A)	BUB1 BUB1L	1085	O43683;	2LAH;4A1G;4QPM;4R8Q;5DMZ;6F7B;7B1F;7B1H;7B1J;	No	No	No
O43707	Alpha-actinin-4 (Non-muscle alpha-actinin 4)	ACTN4	911	O43707;	1WLX;1YDI;2R0O;6O31;6OA6;	No	No	No
O43795	Unconventional myosin-Ib (MYH-1c) (Myosin I alpha) (MMI-alpha) (MMIa)	MYO1B	1136	O43795;	n/a	No	No	No
O43852	Calumenin (Crocalbin) (IEF SSP 9302)	CALU	315	O43852;	n/a	No	No	No
O60216	Double-strand-break repair protein rad21 homolog (hHR21) (Nuclear matrix protein 1) (NXP-1) (SCC1 homolog) [Cleaved into: 64-kDa C-terminal product (64-kDa carboxy-terminal product) (65-kDa carboxy-terminal product)]	RAD21 HR21 KIAA0078 NXP1 SCC1	631	O60216;	4PJU;4PJW;4PK7;6QNX;6RRC;6RRK;6WG3;6WGE;	No	No	No
O60239	SH3 domain-binding protein 5 (SH3BP-5) (SH3 domain-binding protein that preferentially associates with BTK)	SH3BP5 SAB	455	O60239;	4H3B;6DJL;6IXE;6IXF;6IXG;6IXV;	No	No	No
O60248	Protein SOX-15 (Protein SOX-12) (Protein SOX-20)	SOX15 SOX12 SOX20 SOX26 SOX27	233	O60248;	n/a	No	No	No
O60315	Zinc finger E-box-binding homeobox 2 (Smad-interacting protein 1) (SMADIP1) (Zinc finger homeobox protein 1b)	ZEB2 KIAA0569 SIP1 ZFHX1B ZFX1B HRIHFB2411	1214	O60315;	2DA7;	No	No	No
O60437	Periplakin (190 kDa paraneoplastic pemphigus antigen) (195 kDa cornified envelope precursor protein)	PPL KIAA0568	1756	O60437;	4Q28;	No	No	No
O60566	Mitotic checkpoint serine/threonine-protein kinase BUB1 beta (EC 2.7.11.1) (MAD3/BUB1-related protein kinase) (hBUBR1) (Mitotic checkpoint kinase MAD3L) (Protein SSK1)	BUB1B BUBR1 MAD3L SSK1	1050	O60566;	2WVI;3SI5;4GGD;5JJA;5K6S;5KHU;5LCW;5SWF;6TLJ;	No	No	No
O60664	Perilipin-3 (47 kDa mannose 6-phosphate receptor-binding protein) (47 kDa MPR-binding protein) (Cargo selection protein TIP47) (Mannose-6-phosphate receptor-binding protein 1) (Placental protein 17) (PP17)	PLIN3 M6PRBP1 TIP47	434	O60664;	n/a	No	No	No
O60682	Musculin (Activated B-cell factor 1) (ABF-1) (Class A basic helix-loop-helix protein 22) (bHLHa22)	MSC ABF1 BHLHA22	206	O60682;	n/a	No	No	No
O60760	Hematopoietic prostaglandin D synthase (H-PGDS) (EC 5.3.99.2) (GST class-sigma) (Glutathione S-transferase) (EC 2.5.1.18) (Glutathione-dependent PGD synthase) (Glutathione-requiring prostaglandin D synthase) (Prostaglandin-H2 D-isomerase)	HPGDS GSTS PGDS PTGDS2	199	O60760;	1IYH;1IYI;1V40;2CVD;2VCQ;2VCW;2VCX;2VCZ;2VD0;2VD1;3EE2;3KXO;3VI5;3VI7;4EC0;4EDY;4EDZ;4EE0;5AIS;5AIV;5AIX;5YWE;5YWX;5YX1;6N4E;6W58;6W8H;6ZTC;7JR6;7JR8;	No	No	No
O60784	Target of Myb1 membrane trafficking protein (Target of Myb protein 1)	TOM1	492	O60784;	1ELK;1WRD;2N2N;2N9D;6J56;	No	No	No
O60814	Histone H2B type 1-K (H2B K) (HIRA-interacting protein 1)	H2BC12 H2BFT HIRIP1 HIST1H2BK	126	O60814;	2CV5;6KE9;6L9H;6LE9;6T79;6T7A;6T7B;6T7C;6T7D;6V92;6Y5D;7BWD;7DBP;7JZV;7PET;7PEU;7PEV;7PEW;7PEX;7PEY;7PEZ;7PF0;7PF2;7PF3;7PF4;7PF5;7PF6;7PFA;7PFC;7PFD;7PFE;7PFF;7PFT;7PFU;7PFV;7PFW;7PFX;7V90;7V96;7V99;7V9C;7V9J;7V9K;7V9S;7VA4;7XCR;7XCT;7XD1;	No	No	No
O60861	Growth arrest-specific protein 7 (GAS-7)	GAS7 KIAA0394	476	O60861;	2LX7;2YSH;	No	No	No
O60879	Protein diaphanous homolog 2 (Diaphanous-related formin-2) (DRF2)	DIAPH2 DIA	1101	O60879;	n/a	No	No	No
O60902	Short stature homeobox protein 2 (Homeobox protein Og12X) (Paired-related homeobox protein SHOT)	SHOX2 OG12X SHOT	331	O60902;	n/a	No	No	No
O60911	Cathepsin L2 (EC 3.4.22.43) (Cathepsin U) (Cathepsin V)	CTSV CATL2 CTSL2 CTSU UNQ268/PRO305	334	O60911;	1FH0;3H6S;3KFQ;	No	No	No
O60925	Prefoldin subunit 1	PFDN1 PFD1	122	O60925;	6NR8;6NR9;6NRB;6NRC;6NRD;	No	No	No
O60941	Dystrobrevin beta (DTN-B) (Beta-dystrobrevin)	DTNB	627	O60941;	n/a	No	No	No
O75030	Microphthalmia-associated transcription factor (Class E basic helix-loop-helix protein 32) (bHLHe32)	MITF BHLHE32	526	O75030;	4C7N;7D8R;7D8S;7D8T;	No	No	No
O75044	SLIT-ROBO Rho GTPase-activating protein 2 (srGAP2) (Formin-binding protein 2) (Rho GTPase-activating protein 34)	SRGAP2 ARHGAP34 FNBP2 KIAA0456 SRGAP2A	1071	O75044;	2DL8;4RTT;4RUG;5I6J;5I6R;5I7D;	No	No	No
O75140	GATOR complex protein DEPDC5 (DEP domain-containing protein 5)	DEPDC5 KIAA0645	1603	O75140;	6CES;6CET;7T3A;7T3B;7T3C;	No	No	No
O75165	DnaJ homolog subfamily C member 13 (Required for receptor-mediated endocytosis 8) (RME-8)	DNAJC13 KIAA0678 RME8	2243	O75165;	n/a	No	No	No
O75364	Pituitary homeobox 3 (Homeobox protein PITX3) (Paired-like homeodomain transcription factor 3)	PITX3 PTX3	302	O75364;	n/a	No	No	No
O75367	Core histone macro-H2A.1 (Histone macroH2A1) (mH2A1) (Histone H2A.y) (H2A/y) (Medulloblastoma antigen MU-MB-50.205)	MACROH2A1 H2AFY	369	O75367;	1U35;1ZR3;1ZR5;2F8N;2FXK;3HQH;3HSV;3IID;3IIF;3IVB;5IIT;5LNC;7D3Y;	No	No	No
O75369	Filamin-B (FLN-B) (ABP-278) (ABP-280 homolog) (Actin-binding-like protein) (Beta-filamin) (Filamin homolog 1) (Fh1) (Filamin-3) (Thyroid autoantigen) (Truncated actin-binding protein) (Truncated ABP)	FLNB FLN1L FLN3 TABP TAP	2602	O75369;	2DI8;2DI9;2DIA;2DIB;2DIC;2DJ4;2DLG;2DMB;2DMC;2E9I;2E9J;2EE6;2EE9;2EEA;2EEB;2EEC;2EED;2WA5;2WA6;2WA7;3FER;4B7L;5DCP;	No	No	No
O75373	Zinc finger protein 737 (Zinc finger protein 102)	ZNF737 ZNF102	536	O75373;	n/a	No	No	No
O75376	Nuclear receptor corepressor 1 (N-CoR) (N-CoR1)	NCOR1 KIAA1047	2440	O75376;	2EQR;3H52;3KMZ;3N00;4MDD;4WVD;6ONI;6WMQ;6WMS;6XXS;6XYX;6XZZ;6Y17;6ZBU;8DKN;8DKV;	No	No	No
O75419	Cell division control protein 45 homolog (PORC-PI-1)	CDC45 CDC45L CDC45L2 UNQ374/PRO710	566	O75419;	5DGO;6XTX;6XTY;7PFO;7PLO;	No	No	No
O75444	Transcription factor Maf (Proto-oncogene c-Maf) (V-maf musculoaponeurotic fibrosarcoma oncogene homolog)	MAF	373	O75444;	n/a	No	No	No
O75446	Histone deacetylase complex subunit SAP30 (30 kDa Sin3-associated polypeptide) (Sin3 corepressor complex subunit SAP30) (Sin3-associated polypeptide p30)	SAP30	220	O75446;	2KDP;	No	No	No
O75469	Nuclear receptor subfamily 1 group I member 2 (Orphan nuclear receptor PAR1) (Orphan nuclear receptor PXR) (Pregnane X receptor) (Steroid and xenobiotic receptor) (SXR)	NR1I2 PXR	434	O75469;	1ILG;1ILH;1M13;1NRL;1SKX;2O9I;2QNV;3CTB;3HVL;3R8D;4J5W;4J5X;4NY9;4S0S;4S0T;4X1F;4X1G;4XAO;4XHD;5A86;5X0R;6BNS;6DUP;6HJ2;6HTY;6NX1;6P2B;6S41;6TFI;6XP9;7AX8;7AX9;7AXA;7AXB;7AXC;7AXD;7AXE;7AXF;7AXG;7AXH;7AXI;7AXJ;7AXK;7AXL;7CHG;7N2A;7RIO;7RIU;7RIV;	No	No	No
O75525	KH domain-containing, RNA-binding, signal transduction-associated protein 3 (RNA-binding protein T-Star) (Sam68-like mammalian protein 2) (SLM-2) (Sam68-like phosphotyrosine protein)	KHDRBS3 SALP SLM2	346	O75525;	5EL3;5ELR;5ELS;5ELT;5EMO;	No	No	No
O75556	Mammaglobin-B (Lacryglobin) (Lipophilin-C) (Mammaglobin-2) (Secretoglobin family 2A member 1)	SCGB2A1 LIPHC MGB2 UGB3	95	O75556;	n/a	No	No	No
O75558	Syntaxin-11	STX11	287	O75558;	n/a	No	No	No
O75593	Forkhead box protein H1 (Forkhead activin signal transducer 1) (Fast-1) (hFAST-1) (Forkhead activin signal transducer 2) (Fast-2)	FOXH1 FAST1 FAST2	365	O75593;	5XOC;	No	No	No
O75717	WD repeat and HMG-box DNA-binding protein 1 (Acidic nucleoplasmic DNA-binding protein 1) (And-1)	WDHD1 AND1	1129	O75717;	2D7L;5GVA;5GVB;5OGS;6XTY;7PFO;7PLO;	No	No	No
O75718	Cartilage-associated protein	CRTAP CASP	401	O75718;	n/a	No	No	No
O75800	Zinc finger MYND domain-containing protein 10 (Protein BLu)	ZMYND10 BLU LUCA12.4	440	O75800;	2D8Q;2DAN;	No	No	No
O75815	Breast cancer anti-estrogen resistance protein 3 (Novel SH2-containing protein 2) (SH2 domain-containing protein 3B)	BCAR3 NSP2 SH2D3B UNQ271/PRO308	825	O75815;	3T6A;	No	No	No
O75843	AP-1 complex subunit gamma-like 2 (Gamma2-adaptin) (G2ad)	AP1G2	785	O75843;	2E9G;2YMT;3ZHF;4BCX;	No	No	No
O75995	SAM and SH3 domain-containing protein 3 (SH3 protein expressed in lymphocytes homolog)	SASH3 CXorf9 SLY	380	O75995;	n/a	No	No	No
O76027	Annexin A9 (Annexin XXXI) (Annexin-31) (Annexin-9) (Pemphaxin)	ANXA9 ANX31	345	O76027;	n/a	No	No	No
O76038	Secretagogin	SCGN SECRET	276	O76038;	n/a	No	No	No
O76054	SEC14-like protein 2 (Alpha-tocopherol-associated protein) (TAP) (hTAP) (Squalene transfer protein) (Supernatant protein factor) (SPF)	SEC14L2 C22orf6 KIAA1186 KIAA1658	403	O76054;	1O6U;1OLM;4OMJ;4OMK;	No	No	No
O76081	Regulator of G-protein signaling 20 (RGS20) (Gz-selective GTPase-activating protein) (G(z)GAP) (Gz-GAP) (Regulator of G-protein signaling Z1) (Regulator of Gz-selective protein signaling 1)	RGS20 RGSZ1 ZGAP1	388	O76081;	n/a	No	No	No
O94761	ATP-dependent DNA helicase Q4 (EC 3.6.4.12) (DNA helicase, RecQ-like type 4) (RecQ4) (RTS) (RecQ protein-like 4)	RECQL4 RECQ4	1208	O94761;	2KMU;5LST;	No	No	No
O94819	Kelch repeat and BTB domain-containing protein 11 (Chronic myelogenous leukemia-associated protein) (Kelch domain-containing protein 7B)	KBTBD11 CMLAP KIAA0711 KLHDC7C	623	O94819;	n/a	No	No	No
O94832	Unconventional myosin-Id	MYO1D KIAA0727	1006	O94832;	n/a	No	No	No
O94851	[F-actin]-monooxygenase MICAL2 (EC 1.14.13.225) (MICAL C-terminal-like protein) (Mical-cL) (Molecule interacting with CasL protein 2) (MICAL-2)	MICAL2 KIAA0750 MICAL2PV1 MICAL2PV2 MICALCL	1957	O94851;	2E9K;5SZH;5SZI;5SZJ;5SZK;	No	No	No
O94900	Thymocyte selection-associated high mobility group box protein TOX (Thymus high mobility group box protein TOX)	TOX KIAA0808	526	O94900;	n/a	No	No	No
O94929	Actin-binding LIM protein 3 (abLIM-3) (Actin-binding LIM protein family member 3)	ABLIM3 KIAA0843 HMFN1661	683	O94929;	1UJS;2DJ7;	No	No	No
O95067	G2/mitotic-specific cyclin-B2	CCNB2	398	O95067;	n/a	No	No	No
O95072	Meiotic recombination protein REC8 homolog (Cohesin Rec8p)	REC8 REC8L1	547	O95072;	n/a	No	No	No
O95153	Peripheral-type benzodiazepine receptor-associated protein 1 (PRAX-1) (Peripheral benzodiazepine receptor-interacting protein) (PBR-IP) (RIMS-binding protein 1) (RIM-BP1) (TSPO-associated protein 1)	TSPOAP1 BZRAP1 KIAA0612 RBP1 RIMBP1	1857	O95153;	n/a	No	No	No
O95199	RCC1 and BTB domain-containing protein 2 (Chromosome condensation 1-like) (CHC1-L) (RCC1-like G exchanging factor) (Regulator of chromosome condensation and BTB domain-containing protein 2)	RCBTB2 CHC1L RLG	551	O95199;	n/a	No	No	No
O95229	ZW10 interactor (ZW10-interacting protein 1) (Zwint-1)	ZWINT	277	O95229;	n/a	No	No	No
O95231	Homeobox protein VENTX (VENT homeobox homolog) (VENT-like homeobox protein 2)	VENTX HPX42B VENTX2	258	O95231;	n/a	No	No	No
O95238	SAM pointed domain-containing Ets transcription factor (Prostate epithelium-specific Ets transcription factor) (Prostate-specific Ets) (Prostate-derived Ets factor)	SPDEF PDEF PSE	335	O95238;	1YO5;2DKX;	No	No	No
O95294	RasGAP-activating-like protein 1 (RAS protein activator like 1) (Ras GTPase-activating-like protein)	RASAL1 RASAL	804	O95294;	n/a	No	No	No
O95302	Peptidyl-prolyl cis-trans isomerase FKBP9 (PPIase FKBP9) (EC 5.2.1.8) (63 kDa FK506-binding protein) (63 kDa FKBP) (FKBP-63) (FK506-binding protein 9) (FKBP-9) (Rotamase)	FKBP9 FKBP60 FKBP63	570	O95302;	n/a	No	No	No
O95379	Tumor necrosis factor alpha-induced protein 8 (TNF alpha-induced protein 8) (Head and neck tumor and metastasis-related protein) (MDC-3.13) (NF-kappa-B-inducible DED-containing protein) (NDED) (SCC-S2) (TNF-induced protein GG2-1)	TNFAIP8	198	O95379;	n/a	No	No	No
O95407	Tumor necrosis factor receptor superfamily member 6B (Decoy receptor 3) (DcR3) (Decoy receptor for Fas ligand) (M68)	TNFRSF6B DCR3 TR6 UNQ186/PRO212	300	O95407;	3K51;3MHD;3MI8;4J6G;4KGG;4KGQ;4MSV;5L36;	No	No	No
O95466	Formin-like protein 1 (CLL-associated antigen KW-13) (Leukocyte formin)	FMNL1 C17orf1 C17orf1B FMNL FRL1	1100	O95466;	4YDH;	No	No	No
O95678	Keratin, type II cytoskeletal 75 (Cytokeratin-75) (CK-75) (Keratin-6 hair follicle) (hK6hf) (Keratin-75) (K75) (Type II keratin-K6hf) (Type-II keratin Kb18)	KRT75 K6HF KB18	551	O95678;	n/a	No	No	No
O95749	Geranylgeranyl pyrophosphate synthase (GGPP synthase) (GGPPSase) (EC 2.5.1.-) ((2E,6E)-farnesyl diphosphate synthase) (Dimethylallyltranstransferase) (EC 2.5.1.1) (Farnesyl diphosphate synthase) (Farnesyltranstransferase) (EC 2.5.1.29) (Geranylgeranyl diphosphate synthase) (Geranyltranstransferase) (EC 2.5.1.10)	GGPS1	300	O95749;	2Q80;6C56;6C57;6G31;6G32;6R4V;	No	No	No
O95759	TBC1 domain family member 8 (AD 3) (Vascular Rab-GAP/TBC-containing protein)	TBC1D8 VRP	1140	O95759;	n/a	No	No	No
O95786	Antiviral innate immune response receptor RIG-I (ATP-dependent RNA helicase DDX58) (EC 3.6.4.13) (DEAD box protein 58) (RIG-I-like receptor 1) (RLR-1) (RNA sensor RIG-I) (Retinoic acid-inducible gene 1 protein) (RIG-1) (Retinoic acid-inducible gene I protein) (RIG-I)	RIGI DDX58	925	O95786;	2LWD;2LWE;2QFB;2QFD;2RMJ;2YKG;3LRN;3LRR;3NCU;3OG8;3ZD6;3ZD7;4AY2;4BPB;4NQK;4ON9;4P4H;5E3H;5F98;5F9F;5F9H;6GPG;6KYV;7BAH;7BAI;7JL1;7JL3;7MK1;	No	No	No
O95817	BAG family molecular chaperone regulator 3 (BAG-3) (Bcl-2-associated athanogene 3) (Bcl-2-binding protein Bis) (Docking protein CAIR-1)	BAG3 BIS	575	O95817;	n/a	No	No	No
O95948	One cut domain family member 2 (Hepatocyte nuclear factor 6-beta) (HNF-6-beta) (One cut homeobox 2) (Transcription factor ONECUT-2) (OC-2)	ONECUT2 HNF6B	504	O95948;	n/a	No	No	No
O95969	Secretoglobin family 1D member 2 (Lipophilin-B)	SCGB1D2 LIPHB LPNB	90	O95969;	n/a	No	No	No
O95999	B-cell lymphoma/leukemia 10 (B-cell CLL/lymphoma 10) (Bcl-10) (CARD-containing molecule enhancing NF-kappa-B) (CARD-like apoptotic protein) (hCLAP) (CED-3/ICH-1 prodomain homologous E10-like regulator) (CIPER) (Cellular homolog of vCARMEN) (cCARMEN) (Cellular-E10) (c-E10) (Mammalian CARD-containing adapter molecule E10) (mE10)	BCL10 CIPER CLAP	233	O95999;	2MB9;6BZE;6GK2;8CZD;8CZO;	No	No	No
P00973	2'-5'-oligoadenylate synthase 1 ((2-5')oligo(A) synthase 1) (2-5A synthase 1) (EC 2.7.7.84) (E18/E16) (p46/p42 OAS)	OAS1 OIAS	400	P00973;	4IG8;	No	No	No
P01023	Alpha-2-macroglobulin (Alpha-2-M) (C3 and PZP-like alpha-2-macroglobulin domain-containing protein 5)	A2M CPAMD5 FWP007	1474	P01023;	1BV8;2P9R;6TAV;7O7L;7O7M;7O7N;7O7O;7O7P;7O7Q;7O7R;7O7S;	No	No	No
P01024	Complement C3 (C3 and PZP-like alpha-2-macroglobulin domain-containing protein 1) [Cleaved into: Complement C3 beta chain; C3-beta-c (C3bc); Complement C3 alpha chain; C3a anaphylatoxin; Acylation stimulating protein (ASP) (C3adesArg); Complement C3b alpha' chain; Complement C3c alpha' chain fragment 1; Complement C3dg fragment; Complement C3g fragment; Complement C3d fragment; Complement C3f fra…	C3 CPAMD1	1663	P01024;	1C3D;1GHQ;1W2S;2A73;2A74;2GOX;2I07;2ICE;2ICF;2NOJ;2QKI;2WII;2WIN;2WY7;2WY8;2XQW;2XWB;2XWJ;3D5R;3D5S;3G6J;3L3O;3L5N;3NMS;3OED;3OHX;3OXU;3RJ3;3T4A;4HW5;4HWJ;4I6O;4M76;4ONT;4ZH1;5FO7;5FO8;5FO9;5FOA;5FOB;5NBQ;5O32;5O35;6EHG;6RMT;6RMU;6RUR;6RUV;6S0B;6YO6;7AKK;7BAG;7NOZ;7PI6;7QIV;7TV9;7UE9;	No	No	No
P01031	Complement C5 (C3 and PZP-like alpha-2-macroglobulin domain-containing protein 4) [Cleaved into: Complement C5 beta chain; Complement C5 alpha chain; C5a anaphylatoxin; Complement C5 alpha' chain]	C5 CPAMD4	1676	P01031;	1CFA;1KJS;1XWE;3CU7;3HQA;3HQB;3KLS;3KM9;3PRX;3PVM;4A5W;4E0S;4P39;4UU9;5B4P;5B71;5HCC;5HCD;5HCE;5I5K;6H03;6H04;6RPT;6RQJ;7AD6;7AD7;7NYC;7NYD;	No	No	No
P01100	Protein c-Fos (Cellular oncogene fos) (Fos proto-oncogene, AP-1 transcription factor subunit) (G0/G1 switch regulatory protein 7) (Proto-oncogene c-Fos) (Transcription factor AP-1 subunit c-Fos)	FOS G0S7	380	P01100;	1A02;1FOS;1S9K;	No	No	No
P01106	Myc proto-oncogene protein (Class E basic helix-loop-helix protein 39) (bHLHe39) (Proto-oncogene c-Myc) (Transcription factor p64)	MYC BHLHE39	439	P01106;	1A93;1EE4;1MV0;1NKP;2A93;2OR9;4Y7R;5I4Z;5I50;6C4U;6E16;6E24;6G6J;6G6K;6G6L;7T1Y;7T1Z;	No	No	No
P02538	Keratin, type II cytoskeletal 6A (Cytokeratin-6A) (CK-6A) (Cytokeratin-6D) (CK-6D) (Keratin-6A) (K6A) (Type-II keratin Kb6) (allergen Hom s 5)	KRT6A K6A KRT6D	564	P02538;	5KI0;	No	No	No
P02545	Prelamin-A/C [Cleaved into: Lamin-A/C (70 kDa lamin) (Renal carcinoma antigen NY-REN-32)]	LMNA LMN1	664	P02545;	1IFR;1IVT;1X8Y;2XV5;2YPT;3GEF;3V4Q;3V4W;3V5B;6GHD;6JLB;6RPR;6SNZ;6YF5;6YJD;7CRG;7D9N;7Z21;	No	No	No
P02649	Apolipoprotein E (Apo-E)	APOE	317	P02649;	1B68;1BZ4;1EA8;1GS9;1H7I;1LE2;1LE4;1LPE;1NFN;1NFO;1OEF;1OEG;1OR2;1OR3;2KC3;2KNY;2L7B;6IWB;6NCN;6NCO;7FCR;7FCS;	No	No	No
P02654	Apolipoprotein C-I (Apo-CI) (ApoC-I) (Apolipoprotein C1) [Cleaved into: Truncated apolipoprotein C-I]	APOC1	83	P02654;	1ALE;1ALF;1IOJ;1OPP;6DVU;6DXR;6DZ6;6NF3;	No	No	No
P02792	Ferritin light chain (Ferritin L subunit)	FTL	175	P02792;	2FFX;2FG4;2FG8;3KXU;4V6B;5LG8;6TR9;6TS0;6TS1;6TSA;6TSF;6TSJ;6WX6;	No	No	No
P03372	Estrogen receptor (ER) (ER-alpha) (Estradiol receptor) (Nuclear receptor subfamily 3 group A member 1)	ESR1 ESR NR3A1	595	P03372;	1A52;1ERE;1ERR;1G50;1GWQ;1GWR;1HCP;1HCQ;1L2I;1PCG;1QKT;1QKU;1R5K;1SJ0;1UOM;1X7E;1X7R;1XP1;1XP6;1XP9;1XPC;1XQC;1YIM;1YIN;1ZKY;2AYR;2B1V;2B1Z;2B23;2BJ4;2FAI;2G44;2G5O;2I0J;2IOG;2IOK;2JF9;2JFA;2LLO;2LLQ;2OCF;2OUZ;2P15;2POG;2Q6J;2Q70;2QA6;2QA8;2QAB;2QE4;2QGT;2QGW;2QH6;2QR9;2QSE;2QXM;2QXS;2QZO;2R6W;2R6Y;2YAT;2YJA;3CBM;3CBO;3CBP;3DT3;3ERD;3ERT;3HLV;3HM1;3L03;3OS8;3OS9;3OSA;3Q95;3UU7;3UUA;3UUC;3UUD;4AA6…	No	No	No
P03956	Interstitial collagenase (EC 3.4.24.7) (Fibroblast collagenase) (Matrix metalloproteinase-1) (MMP-1) [Cleaved into: 22 kDa interstitial collagenase; 27 kDa interstitial collagenase]	MMP1 CLG	469	P03956;	1AYK;1CGE;1CGF;1CGL;1HFC;1SU3;2AYK;2CLT;2J0T;2TCL;3AYK;3SHI;4AUO;4AYK;966C;	No	No	No
P04040	Catalase (EC 1.11.1.6)	CAT	527	P04040;	1DGB;1DGF;1DGG;1DGH;1F4J;1QQW;7P8W;7VD9;	No	No	No
P04179	Superoxide dismutase [Mn], mitochondrial (EC 1.15.1.1)	SOD2	222	P04179;	1AP5;1AP6;1EM1;1JA8;1LUV;1LUW;1MSD;1N0J;1N0N;1PL4;1PM9;1QNM;1SZX;1VAR;1XDC;1XIL;1ZSP;1ZTE;1ZUQ;2ADP;2ADQ;2GDS;2P4K;2QKA;2QKC;3C3S;3C3T;5GXO;5T30;5VF9;7KKS;7KKU;7KKW;7KLB;	No	No	No
P04198	N-myc proto-oncogene protein (Class E basic helix-loop-helix protein 37) (bHLHe37)	MYCN BHLHE37 NMYC	464	P04198;	5G1X;	No	No	No
P04259	Keratin, type II cytoskeletal 6B (Cytokeratin-6B) (CK-6B) (Keratin-6B) (K6B) (Type-II keratin Kb10)	KRT6B K6B KRTL1	564	P04259;	n/a	No	No	No
P04271	Protein S100-B (S-100 protein beta chain) (S-100 protein subunit beta) (S100 calcium-binding protein B)	S100B	92	P04271;	1MQ1;1UWO;2H61;2M49;2PRU;3CZT;3D0Y;3D10;3HCM;4XYN;5CSF;5CSI;5CSJ;5CSN;5D7F;	No	No	No
P04637	Cellular tumor antigen p53 (Antigen NY-CO-13) (Phosphoprotein p53) (Tumor suppressor p53)	TP53 P53	393	P04637;	1A1U;1AIE;1C26;1DT7;1GZH;1H26;1HS5;1JSP;1KZY;1MA3;1OLG;1OLH;1PES;1PET;1SAE;1SAF;1SAK;1SAL;1TSR;1TUP;1UOL;1XQH;1YC5;1YCQ;1YCR;1YCS;2AC0;2ADY;2AHI;2ATA;2B3G;2BIM;2BIN;2BIO;2BIP;2BIQ;2F1X;2FEJ;2FOJ;2FOO;2GS0;2H1L;2H2D;2H2F;2H4F;2H4H;2H4J;2H59;2J0Z;2J10;2J11;2J1W;2J1X;2J1Y;2J1Z;2J20;2J21;2K8F;2L14;2LY4;2MEJ;2MWO;2MWP;2MWY;2MZD;2OCJ;2PCX;2RUK;2VUK;2WGX;2X0U;2X0V;2X0W;2XWR;2YBG;2YDR;2Z5S;2Z5T;3D05;3D06…	No	No	No
P04908	Histone H2A type 1-B/E (Histone H2A.2) (Histone H2A/a) (Histone H2A/m)	H2AC4 H2AFM HIST1H2AB; H2AC8 H2AFA HIST1H2AE	130	P04908;	2CV5;2RVQ;3A6N;3AFA;3AN2;3AV1;3AV2;3AYW;3AZE;3AZF;3AZG;3AZH;3AZI;3AZJ;3AZK;3AZL;3AZM;3AZN;3W96;3W97;3W98;3W99;3WKJ;3WTP;3X1S;3X1V;4YM5;4YM6;4Z5T;5AV5;5AV6;5AV8;5AV9;5AVB;5AVC;5AY8;5B0Y;5B0Z;5B24;5B2I;5B2J;5B31;5B32;5B40;5CPI;5CPJ;5CPK;5GSE;5GTC;5GXQ;5JRG;5X7X;5XF3;5XF4;5XF5;5Y0C;5Y0D;5Z23;5ZBX;6A5L;6A5O;6A5P;6A5R;6A5T;6A5U;6ACL;6AEE;6BUZ;6E0C;6E0P;6HKT;6HTS;6INQ;6IPU;6IQ4;6IR9;6J4W;6J4X;6J4Y;6J4Z…	No	No	No
P05109	Protein S100-A8 (Calgranulin-A) (Calprotectin L1L subunit) (Cystic fibrosis antigen) (CFAG) (Leukocyte L1 complex light chain) (Migration inhibitory factor-related protein 8) (MRP-8) (p8) (S100 calcium-binding protein A8) (Urinary stone protein band A)	S100A8 CAGA CFAG MRP8	93	P05109;	1MR8;1XK4;4GGF;4XJK;5HLO;5HLV;5W1F;6DS2;	No	No	No
P05164	Myeloperoxidase (MPO) (EC 1.11.2.2) [Cleaved into: Myeloperoxidase; 89 kDa myeloperoxidase; 84 kDa myeloperoxidase; Myeloperoxidase light chain; Myeloperoxidase heavy chain]	MPO	745	P05164;	1CXP;1D2V;1D5L;1D7W;1DNU;1DNW;1MHL;1MYP;3F9P;3ZS0;3ZS1;4C1M;4DL1;4EJX;5FIW;5MFA;5UZU;6AZP;6BMT;7OIH;	No	No	No
P05386	60S acidic ribosomal protein P1 (Large ribosomal subunit protein P1)	RPLP1 RRP1	114	P05386;	2LBF;4BEH;4V6X;	No	No	No
P05387	60S acidic ribosomal protein P2 (Large ribosomal subunit protein P2) (Renal carcinoma antigen NY-REN-44)	RPLP2 D11S2243E RPP2	115	P05387;	1S4J;2JDL;2LBF;2W1O;4BEH;4V6X;5DDZ;5GU4;	No	No	No
P05388	60S acidic ribosomal protein P0 (60S ribosomal protein L10E) (Large ribosomal subunit protein uL10)	RPLP0	317	P05388;	4V6W;4V6X;5AJ0;6OLG;6ZM7;6ZME;6ZMI;6ZMO;	No	No	No
P05783	Keratin, type I cytoskeletal 18 (Cell proliferation-inducing gene 46 protein) (Cytokeratin-18) (CK-18) (Keratin-18) (K18)	KRT18 CYK18 PIG46	430	P05783;	n/a	No	No	No
P05787	Keratin, type II cytoskeletal 8 (Cytokeratin-8) (CK-8) (Keratin-8) (K8) (Type-II keratin Kb8)	KRT8 CYK8	483	P05787;	7K3C;7K3X;7K3Y;	No	No	No
P06400	Retinoblastoma-associated protein (p105-Rb) (p110-RB1) (pRb) (Rb) (pp110)	RB1	928	P06400;	1AD6;1GH6;1GUX;1H25;1N4M;1O9K;1PJM;2AZE;2QDJ;2R7G;3N5U;3POM;4CRI;4ELJ;4ELL;	No	No	No
P06753	Tropomyosin alpha-3 chain (Gamma-tropomyosin) (Tropomyosin-3) (Tropomyosin-5) (hTM5)	TPM3	285	P06753;	6OTN;	No	No	No
P06899	Histone H2B type 1-J (Histone H2B.1) (Histone H2B.r) (H2B/r)	H2BC11 H2BFR HIST1H2BJ	126	P06899;	2RVQ;3A6N;3AFA;3AN2;3AV1;3AV2;3AYW;3AZE;3AZF;3AZG;3AZH;3AZI;3AZJ;3AZK;3AZL;3AZM;3AZN;3W96;3W97;3W98;3W99;3WA9;3WAA;3WTP;4CAY;4YM5;4YM6;4Z5T;5AV5;5AV6;5AV8;5AV9;5AVB;5AVC;5AY8;5B0Y;5B0Z;5B24;5B2I;5B2J;5B31;5B32;5B33;5B40;5CPI;5CPJ;5CPK;5FUG;5GSE;5GTC;5GXQ;5JRG;5VEY;5X7X;5XF3;5XF4;5XF5;5Y0C;5Y0D;5Z23;5Z30;5ZBX;6A5L;6A5O;6A5P;6A5R;6A5T;6A5U;6BUZ;6E0C;6E0P;6HKT;6HTS;6INQ;6IPU;6IQ4;6IR9;6J4W;6J4X;6J4Y…	No	No	No
P07108	Acyl-CoA-binding protein (ACBP) (Diazepam-binding inhibitor) (DBI) (Endozepine) (EP)	DBI	87	P07108;	2CB8;2FJ9;	No	No	No
P07196	Neurofilament light polypeptide (NF-L) (68 kDa neurofilament protein) (Neurofilament triplet L protein)	NEFL NF68 NFL	543	P07196;	n/a	No	No	No
P07305	Histone H1.0 (Histone H1') (Histone H1(0)) [Cleaved into: Histone H1.0, N-terminally processed]	H1-0 H1F0 H1FV	194	P07305;	6HQ1;6LA2;6LA8;6LA9;6LAB;6N88;6N89;7COW;7DBP;7K5X;	No	No	No
P07355	Annexin A2 (Annexin II) (Annexin-2) (Calpactin I heavy chain) (Calpactin-1 heavy chain) (Chromobindin-8) (Lipocortin II) (Placental anticoagulant protein IV) (PAP-IV) (Protein I) (p36)	ANXA2 ANX2 ANX2L4 CAL1H LPC2D	339	P07355;	1W7B;1XJL;2HYU;2HYV;2HYW;4DRW;4FTG;4HRH;5LPU;5LPX;5LQ0;5LQ2;5N7D;5N7F;5N7G;6TWQ;6TWU;6TWX;6TWY;7DTO;7EQ7;7NMI;7P70;7P71;7P72;7P73;7P74;7PC3;7PC4;7PC5;7PC7;7PC8;7PC9;7PCB;7QQL;7QQM;7QQN;	No	No	No
P07602	Prosaposin (Proactivator polypeptide) [Cleaved into: Saposin-A (Protein A); Saposin-B-Val; Saposin-B (Cerebroside sulfate activator) (CSAct) (Dispersin) (Sphingolipid activator protein 1) (SAP-1) (Sulfatide/GM1 activator); Saposin-C (A1 activator) (Co-beta-glucosidase) (Glucosylceramidase activator) (Sphingolipid activator protein 2) (SAP-2); Saposin-D (Component C) (Protein C)]	PSAP GLBA SAP1	524	P07602;	1M12;1N69;1SN6;2DOB;2GTG;2QYP;2R0R;2R1Q;2RB3;2Z9A;3BQP;3BQQ;4DDJ;4UEX;4V2O;6SLR;	No	No	No
P07711	Procathepsin L (EC 3.4.22.15) (Cathepsin L1) (Major excreted protein) (MEP) [Cleaved into: Cathepsin L; Cathepsin L heavy chain; Cathepsin L light chain]	CTSL CTSL1	333	P07711;	1CJL;1CS8;1ICF;1MHW;2NQD;2VHS;2XU1;2XU3;2XU4;2XU5;2YJ2;2YJ8;2YJ9;2YJB;2YJC;3BC3;3H89;3H8B;3H8C;3HHA;3HWN;3IV2;3K24;3KSE;3OF8;3OF9;4AXL;4AXM;5F02;5I4H;5MAE;5MAJ;5MQY;6EZP;6EZX;6F06;6JD0;6JD8;	No	No	No
P07919	Cytochrome b-c1 complex subunit 6, mitochondrial (Complex III subunit 6) (Complex III subunit VIII) (Cytochrome c1 non-heme 11 kDa protein) (Mitochondrial hinge protein) (Ubiquinol-cytochrome c reductase complex 11 kDa protein)	UQCRH	91	P07919;	5XTE;5XTH;5XTI;	No	No	No
P07951	Tropomyosin beta chain (Beta-tropomyosin) (Tropomyosin-2)	TPM2 TMSB	284	P07951;	n/a	No	No	No
P07988	Pulmonary surfactant-associated protein B (SP-B) (18 kDa pulmonary-surfactant protein) (6 kDa protein) (Pulmonary surfactant-associated proteolipid SPL(Phe))	SFTPB SFTP3	381	P07988;	1DFW;1KMR;1RG3;1RG4;1SSZ;2DWF;2JOU;2M0H;2M1T;	No	No	No
P08133	Annexin A6 (67 kDa calelectrin) (Annexin VI) (Annexin-6) (Calphobindin-II) (CPB-II) (Chromobindin-20) (Lipocortin VI) (Protein III) (p68) (p70)	ANXA6 ANX6	673	P08133;	1M9I;	No	No	No
P08253	72 kDa type IV collagenase (EC 3.4.24.24) (72 kDa gelatinase) (Gelatinase A) (Matrix metalloproteinase-2) (MMP-2) (TBE-1) [Cleaved into: PEX]	MMP2 CLG4A	660	P08253;	1CK7;1CXW;1EAK;1GEN;1GXD;1HOV;1J7M;1KS0;1QIB;1RTG;3AYU;	No	No	No
P08254	Stromelysin-1 (SL-1) (EC 3.4.24.17) (Matrix metalloproteinase-3) (MMP-3) (Transin-1)	MMP3 STMY1	477	P08254;	1B3D;1B8Y;1BIW;1BM6;1BQO;1C3I;1C8T;1CAQ;1CIZ;1CQR;1D5J;1D7X;1D8F;1D8M;1G05;1G49;1G4K;1HFS;1HY7;1OO9;1QIA;1QIC;1SLM;1SLN;1UEA;1UMS;1UMT;1USN;2D1O;2JNP;2JT5;2JT6;2SRT;2USN;3OHL;3OHO;3USN;4DPE;4G9L;4JA1;6MAV;6N9D;7S7L;7S7M;	No	No	No
P08263	Glutathione S-transferase A1 (EC 2.5.1.18) (13-hydroperoxyoctadecadienoate peroxidase) (EC 1.11.1.-) (Androst-5-ene-3,17-dione isomerase) (EC 5.3.3.-) (GST HA subunit 1) (GST class-alpha member 1) (GST-epsilon) (GSTA1-1) (GTH1) [Cleaved into: Glutathione S-transferase A1, N-terminally processed]	GSTA1	222	P08263;	1GSD;1GSE;1GSF;1GUH;1K3L;1K3O;1K3Y;1LBK;1PKW;1PKZ;1PL1;1PL2;1USB;1XWG;1YDK;2R3X;2R6K;3I69;3I6A;3IK9;3KTL;3L0H;3Q74;3U6V;3ZFB;3ZFL;4HJ2;5JCU;5LCZ;5LD0;6ATO;6ATP;6ATQ;6ATR;6YAW;7BIB;7BIC;	No	No	No
P08567	Pleckstrin (Platelet 47 kDa protein) (p47)	PLEK P47	350	P08567;	1PLS;1W4M;1X05;1XX0;1ZM0;2CSO;2I5C;2I5F;	No	No	No
P08670	Vimentin	VIM	466	P08670;	1GK4;1GK6;1GK7;3G1E;3KLT;3S4R;3SSU;3SWK;3TRT;3UF1;4MCY;4MCZ;4MD0;4MD5;4MDI;4MDJ;4YPC;4YV3;5WHF;6ATF;6ATI;6BIR;6YXK;	No	No	No
P08708	40S ribosomal protein S17 (Small ribosomal subunit protein eS17)	RPS17 RPS17L	135	P08708;	4UG0;4V6X;5A2Q;5AJ0;5FLX;5LKS;5OA3;5T2C;5VYC;6FEC;6G18;6G4S;6G4W;6G51;6G53;6G5H;6G5I;6IP5;6IP6;6IP8;6OLE;6OLF;6OLG;6OLI;6OLZ;6OM0;6OM7;6QZP;6XA1;6Y0G;6Y2L;6Y57;6YBD;6YBS;6YBW;6Z6L;6Z6M;6Z6N;6ZLW;6ZM7;6ZME;6ZMI;6ZMO;6ZMT;6ZMW;6ZN5;6ZOJ;6ZOK;6ZOL;6ZON;6ZP4;6ZUO;6ZV6;6ZVH;6ZVJ;6ZXD;6ZXE;6ZXF;6ZXG;6ZXH;7A09;7K5I;7MQ8;7MQ9;7MQA;7QP6;7QP7;	No	No	No
P08727	Keratin, type I cytoskeletal 19 (Cytokeratin-19) (CK-19) (Keratin-19) (K19)	KRT19	400	P08727;	n/a	No	No	No
P08729	Keratin, type II cytoskeletal 7 (Cytokeratin-7) (CK-7) (Keratin-7) (K7) (Sarcolectin) (Type-II keratin Kb7)	KRT7 SCL	469	P08729;	4XIF;	No	No	No
P08758	Annexin A5 (Anchorin CII) (Annexin V) (Annexin-5) (Calphobindin I) (CPB-I) (Endonexin II) (Lipocortin V) (Placental anticoagulant protein 4) (PP4) (Placental anticoagulant protein I) (PAP-I) (Thromboplastin inhibitor) (Vascular anticoagulant-alpha) (VAC-alpha)	ANXA5 ANX5 ENX2 PP4	320	P08758;	1ANW;1ANX;1AVH;1AVR;1HAK;1HVD;1HVE;1HVF;1HVG;1SAV;2XO2;2XO3;6K22;6K25;	No	No	No
P08779	Keratin, type I cytoskeletal 16 (Cytokeratin-16) (CK-16) (Keratin-16) (K16)	KRT16 KRT16A	473	P08779;	n/a	No	No	No
P09017	Homeobox protein Hox-C4 (Homeobox protein CP19) (Homeobox protein Hox-3E)	HOXC4 HOX3E	264	P09017;	n/a	No	No	No
P09067	Homeobox protein Hox-B5 (Homeobox protein HHO.C10) (Homeobox protein Hox-2A) (Homeobox protein Hu-1)	HOXB5 HOX2A	269	P09067;	n/a	No	No	No
P09086	POU domain, class 2, transcription factor 2 (Lymphoid-restricted immunoglobulin octamer-binding protein NF-A2) (Octamer-binding protein 2) (Oct-2) (Octamer-binding transcription factor 2) (OTF-2)	POU2F2 OCT2 OTF2	479	P09086;	1HDP;	No	No	No
P09211	Glutathione S-transferase P (EC 2.5.1.18) (GST class-pi) (GSTP1-1)	GSTP1 FAEES3 GST3	210	P09211;	10GS;11GS;12GS;13GS;14GS;16GS;17GS;18GS;19GS;1AQV;1AQW;1AQX;1EOG;1EOH;1GSS;1KBN;1LBK;1MD3;1MD4;1PGT;1PX6;1PX7;1ZGN;20GS;22GS;2A2R;2A2S;2GSS;2J9H;2PGT;3CSH;3CSI;3CSJ;3DD3;3DGQ;3GSS;3GUS;3HJM;3HJO;3HKR;3IE3;3KM6;3KMN;3KMO;3N9J;3PGT;4GSS;4PGT;5DAK;5DAL;5DCG;5DDL;5DJL;5DJM;5GSS;5J41;5JCW;5L6X;5X79;6AP9;6GSS;6LLX;6Y1E;7BIA;7GSS;8GSS;9GSS;	No	No	No
P09237	Matrilysin (EC 3.4.24.23) (Matrin) (Matrix metalloproteinase-7) (MMP-7) (Pump-1 protease) (Uterine metalloproteinase)	MMP7 MPSL1 PUMP1	267	P09237;	1MMP;1MMQ;1MMR;2DDY;2MZE;2MZH;2MZI;2Y6C;2Y6D;5UE2;5UE5;	No	No	No
P09238	Stromelysin-2 (SL-2) (EC 3.4.24.22) (Matrix metalloproteinase-10) (MMP-10) (Transin-2)	MMP10 STMY2	476	P09238;	1Q3A;3V96;4ILW;	No	No	No
P09327	Villin-1	VIL1 VIL	827	P09327;	1UNC;3FG7;	No	No	No
P09429	High mobility group protein B1 (High mobility group protein 1) (HMG-1)	HMGB1 HMG1	215	P09429;	2LY4;2RTU;2YRQ;6CG0;6CIJ;6CIK;6CIL;6CIM;6OEM;6OEN;6OEO;	No	No	No
P09486	SPARC (Basement-membrane protein 40) (BM-40) (Osteonectin) (ON) (Secreted protein acidic and rich in cysteine)	SPARC ON	303	P09486;	1BMO;1NUB;1SRA;2V53;	No	No	No
P09525	Annexin A4 (35-beta calcimedin) (Annexin IV) (Annexin-4) (Carbohydrate-binding protein p33/p41) (Chromobindin-4) (Endonexin I) (Lipocortin IV) (P32.5) (PP4-X) (Placental anticoagulant protein II) (PAP-II) (Protein II)	ANXA4 ANX4	319	P09525;	2ZOC;	No	No	No
P09544	Protein Wnt-2 (Int-1-like protein 1) (Int-1-related protein) (IRP)	WNT2 INT1L1 IRP	360	P09544;	n/a	No	No	No
P09629	Homeobox protein Hox-B7 (Homeobox protein HHO.C1) (Homeobox protein Hox-2C)	HOXB7 HOX2C	217	P09629;	n/a	No	No	No
P09630	Homeobox protein Hox-C6 (Homeobox protein CP25) (Homeobox protein HHO.C8) (Homeobox protein Hox-3C)	HOXC6 HOX3C	235	P09630;	n/a	No	No	No
P09668	Pro-cathepsin H [Cleaved into: Cathepsin H mini chain; Cathepsin H (EC 3.4.22.16); Cathepsin H heavy chain; Cathepsin H light chain]	CTSH CPSB	335	P09668;	6CZK;6CZS;	No	No	No
P09913	Interferon-induced protein with tetratricopeptide repeats 2 (IFIT-2) (ISG-54 K) (Interferon-induced 54 kDa protein) (IFI-54K) (P54)	IFIT2 CIG-42 G10P2 IFI54 ISG54	472	P09913;	4G1T;	No	No	No
P09914	Interferon-induced protein with tetratricopeptide repeats 1 (IFIT-1) (Interferon-induced 56 kDa protein) (IFI-56K) (P56)	IFIT1 G10P1 IFI56 IFNAI1 ISG56	478	P09914;	4HOU;5UDI;5UDJ;5UDK;5UDL;5W5H;5W5I;6C6K;	No	No	No
P09917	Polyunsaturated fatty acid 5-lipoxygenase (EC 1.13.11.-) (Arachidonate 5-lipoxygenase) (5-LO) (5-lipoxygenase) (EC 1.13.11.34)	ALOX5 LOG5	674	P09917;	3O8Y;3V92;3V98;3V99;6N2W;6NCF;7TTJ;7TTL;	No	No	No
P0C0L4	Complement C4-A (Acidic complement C4) (C3 and PZP-like alpha-2-macroglobulin domain-containing protein 2) [Cleaved into: Complement C4 beta chain; Complement C4-A alpha chain; C4a anaphylatoxin; C4b-A; C4d-A; Complement C4 gamma chain]	C4A CO4 CPAMD2	1744	P0C0L4;	1HZF;4FXG;4FXK;4XAM;5JPM;5JPN;5JTW;6YSQ;	No	No	No
P0C0L5	Complement C4-B (Basic complement C4) (C3 and PZP-like alpha-2-macroglobulin domain-containing protein 3) [Cleaved into: Complement C4 beta chain; Complement C4-B alpha chain; C4a anaphylatoxin; C4b-B; C4d-B; Complement C4 gamma chain]	C4B CO4 CPAMD3; C4B_2	1744	P0C0L5;	4XAM;6YSQ;	No	No	No
P0C0S5	Histone H2A.Z (H2A/z)	H2AZ1 H2AFZ H2AZ	128	P0C0S5;	1F66;3WA9;4CAY;4NFT;5B31;5B32;5B33;5CHL;5FUG;5Z30;6JOU;6KO2;	No	No	No
P0C2W1	F-box/SPRY domain-containing protein 1 (F-box only protein 45) (hFbxo45)	FBXO45 FBX45	286	P0C2W1;	n/a	No	No	No
P0C671	Protein BNIP5	BNIP5 C6orf222	652	P0C671;	n/a	No	No	No
P0C860	Putative male-specific lethal-3 protein-like 2 (MSL3-like 2) (Male-specific lethal-3 homolog 2) (Male-specific lethal-3 homolog pseudogene 1)	MSL3P1 MSL3L2	447	P0C860;	n/a	No	No	No
P0CI01	Speedy protein E6	SPDYE6	402	P0CI01;	n/a	No	No	No
P0CJ92	Golgin subfamily A member 8H	GOLGA8H	632	P0CJ92;	n/a	No	No	No
P0DJI8	Serum amyloid A-1 protein (SAA) [Cleaved into: Amyloid protein A (Amyloid fibril protein AA); Serum amyloid protein A(2-104); Serum amyloid protein A(3-104); Serum amyloid protein A(2-103); Serum amyloid protein A(2-102); Serum amyloid protein A(4-101)]	SAA1	122	P0DJI8;	4IP8;4IP9;6MST;	No	No	No
P0DJI9	Serum amyloid A-2 protein (SAA2) [Cleaved into: Amyloid A2 protein (AA2)]	SAA2	122	P0DJI9;	n/a	No	No	No
P0DMV8	Heat shock 70 kDa protein 1A (Heat shock 70 kDa protein 1) (HSP70-1) (HSP70.1)	HSPA1A HSP72 HSPA1 HSX70	641	P0DMV8;	1HJO;1S3X;1XQS;2E88;2E8A;2LMG;3A8Y;3ATU;3ATV;3AY9;3D2E;3D2F;3JXU;3LOF;3Q49;4IO8;4J8F;4PO2;4WV5;4WV7;5AQW;5AQX;5AQY;5AQZ;5AR0;5BN8;5BN9;5BPL;5BPM;5BPN;5GJJ;5MKR;5MKS;5XI9;5XIR;6FHK;6G3R;6G3S;6JPV;6K39;6ZYI;7FGM;7KW7;7Q4R;	No	No	No
P0DP24	Calmodulin-2	CALM2 CAM2 CAMB	149	P0DP24;	3O77;3O78;5COC;5J03;5NIN;5VMS;5WSU;5WSV;6PLM;6S5T;6SZ5;6XXF;6Y4O;7MIR;7MIS;7PPO;7PQE;	No	No	No
P0DTA3	Putative speedy protein E11	SPDYE11	265	P0DTA3;	n/a	No	No	No
P10072	Zinc finger protein 875 (Krueppel-related zinc finger protein 1) (Protein HKR1)	ZNF875 HKR1	659	P10072;	n/a	No	No	No
P10242	Transcriptional activator Myb (Proto-oncogene c-Myb)	MYB	640	P10242;	n/a	No	No	No
P10244	Myb-related protein B (B-Myb) (Myb-like protein 2)	MYBL2 BMYB	700	P10244;	6C48;	No	No	No
P10276	Retinoic acid receptor alpha (RAR-alpha) (Nuclear receptor subfamily 1 group B member 1)	RARA NR1B1	462	P10276;	1DKF;1DSZ;3A9E;3KMR;3KMZ;4DQM;5K13;6XWG;7AOS;7APO;	No	No	No
P10588	Nuclear receptor subfamily 2 group F member 6 (V-erbA-related protein 2) (EAR-2)	NR2F6 EAR2 ERBAL2	404	P10588;	n/a	No	No	No
P10809	60 kDa heat shock protein, mitochondrial (EC 5.6.1.7) (60 kDa chaperonin) (Chaperonin 60) (CPN60) (Heat shock protein 60) (HSP-60) (Hsp60) (HuCHA60) (Mitochondrial matrix protein P1) (P60 lymphocyte protein)	HSPD1 HSP60	573	P10809;	4PJ1;6HT7;6MRC;6MRD;7AZP;7L7S;	No	No	No
P10826	Retinoic acid receptor beta (RAR-beta) (HBV-activated protein) (Nuclear receptor subfamily 1 group B member 2) (RAR-epsilon)	RARB HAP NR1B2	455	P10826;	1HRA;1XAP;4DM6;4DM8;4JYG;4JYH;4JYI;5UAN;6SSQ;	No	No	No
P10914	Interferon regulatory factor 1 (IRF-1)	IRF1	325	P10914;	n/a	No	No	No
P11021	Endoplasmic reticulum chaperone BiP (EC 3.6.4.10) (78 kDa glucose-regulated protein) (GRP-78) (Binding-immunoglobulin protein) (BiP) (Heat shock protein 70 family protein 5) (HSP70 family protein 5) (Heat shock protein family A member 5) (Immunoglobulin heavy chain-binding protein)	HSPA5 GRP78	654	P11021;	3IUC;3LDL;3LDN;3LDO;3LDP;5E84;5E85;5E86;5EVZ;5EX5;5EXW;5EY4;5F0X;5F1X;5F2R;6ASY;6CZ1;6DFM;6DFO;6DO2;6DWS;6ZMD;7N1R;	No	No	No
P11047	Laminin subunit gamma-1 (Laminin B2 chain) (Laminin-1 subunit gamma) (Laminin-10 subunit gamma) (Laminin-11 subunit gamma) (Laminin-2 subunit gamma) (Laminin-3 subunit gamma) (Laminin-4 subunit gamma) (Laminin-6 subunit gamma) (Laminin-7 subunit gamma) (Laminin-8 subunit gamma) (Laminin-9 subunit gamma) (S-laminin subunit gamma) (S-LAM gamma)	LAMC1 LAMB2	1609	P11047;	5XAU;7CEC;	No	No	No
P11274	Breakpoint cluster region protein (EC 2.7.11.1) (Renal carcinoma antigen NY-REN-26)	BCR BCR1 D22S11	1271	P11274;	1K1F;2AIN;5N6R;5N7E;5OC7;	No	No	No
P11308	Transcriptional regulator ERG (Transforming protein ERG)	ERG	479	P11308;	1SXE;4IRG;4IRH;4IRI;5YBC;5YBD;6VGE;6VGG;	No	No	No
P11388	DNA topoisomerase 2-alpha (EC 5.6.2.2) (DNA topoisomerase II, alpha isozyme)	TOP2A TOP2	1531	P11388;	1ZXM;1ZXN;4FM9;4R1F;5GWK;5NNE;6ZY5;6ZY6;6ZY7;6ZY8;	No	No	No
P11473	Vitamin D3 receptor (VDR) (1,25-dihydroxyvitamin D3 receptor) (Nuclear receptor subfamily 1 group I member 1)	VDR NR1I1	427	P11473;	1DB1;1IE8;1IE9;1KB2;1KB4;1KB6;1S0Z;1S19;1TXI;1YNW;2HAM;2HAR;2HAS;2HB7;2HB8;3A2I;3A2J;3A3Z;3A40;3A78;3AUQ;3AUR;3AX8;3AZ1;3AZ2;3AZ3;3B0T;3CS4;3CS6;3KPZ;3M7R;3OGT;3P8X;3TKC;3VHW;3W0A;3W0C;3W0Y;3WGP;3WWR;3X31;3X36;4G2I;4ITE;4ITF;5GT4;5V39;5YSY;5YT2;	No	No	No
P11940	Polyadenylate-binding protein 1 (PABP-1) (Poly(A)-binding protein 1)	PABPC1 PAB1 PABP PABP1 PABPC2	636	P11940;	1CVJ;1G9L;1JGN;1JH4;2K8G;2RQG;2RQH;2X04;3KTP;3KTR;3KUI;3KUJ;3KUR;3KUS;3KUT;3PKN;3PTH;4F02;4F25;4F26;5DX1;5DX8;5DXA;5LGP;5LGQ;5LGR;5LGS;7BN3;	No	No	No
P12271	Retinaldehyde-binding protein 1 (Cellular retinaldehyde-binding protein)	RLBP1 CRALBP	317	P12271;	3HX3;3HY5;4CIZ;4CJ6;	No	No	No
P12429	Annexin A3 (35-alpha calcimedin) (Annexin III) (Annexin-3) (Inositol 1,2-cyclic phosphate 2-phosphohydrolase) (Lipocortin III) (Placental anticoagulant protein III) (PAP-III)	ANXA3 ANX3	323	P12429;	1AII;1AXN;	No	No	No
P12524	Protein L-Myc (Class E basic helix-loop-helix protein 38) (bHLHe38) (Protein L-Myc-1) (V-myc myelocytomatosis viral oncogene homolog)	MYCL BHLHE38 LMYC MYCL1	364	P12524;	n/a	No	No	No
P12532	Creatine kinase U-type, mitochondrial (EC 2.7.3.2) (Acidic-type mitochondrial creatine kinase) (Mia-CK) (Ubiquitous mitochondrial creatine kinase) (U-MtCK)	CKMT1A CKMT; CKMT1B CKMT	417	P12532;	1QK1;	No	No	No
P12757	Ski-like protein (Ski-related oncogene) (Ski-related protein)	SKIL SNO	684	P12757;	3EQ5;5C4V;	No	No	No
P13584	Cytochrome P450 4B1 (EC 1.14.14.1) (CYPIVB1) (Cytochrome P450-HP)	CYP4B1	511	P13584;	n/a	No	No	No
P13631	Retinoic acid receptor gamma (RAR-gamma) (Nuclear receptor subfamily 1 group B member 3)	RARG NR1B3	454	P13631;	1EXA;1EXX;1FCX;1FCY;1FCZ;1FD0;2LBD;3LBD;4LBD;5M24;6FX0;	No	No	No
P13646	Keratin, type I cytoskeletal 13 (Cytokeratin-13) (CK-13) (Keratin-13) (K13)	KRT13	458	P13646;	n/a	No	No	No
P13647	Keratin, type II cytoskeletal 5 (58 kDa cytokeratin) (Cytokeratin-5) (CK-5) (Keratin-5) (K5) (Type-II keratin Kb5)	KRT5	590	P13647;	3TNU;6JFV;	No	No	No
P13674	Prolyl 4-hydroxylase subunit alpha-1 (4-PH alpha-1) (EC 1.14.11.2) (Procollagen-proline,2-oxoglutarate-4-dioxygenase subunit alpha-1)	P4HA1 P4HA	534	P13674;	1TJC;2V5F;2YQ8;4BT8;4BT9;4BTA;4BTB;	No	No	No
P13725	Oncostatin-M (OSM)	OSM	252	P13725;	1EVS;	No	No	No
P13797	Plastin-3 (T-plastin)	PLS3	630	P13797;	1AOA;1WJO;7R94;7SX8;7SX9;7SXA;	No	No	No
P13928	Annexin A8 (Annexin VIII) (Annexin-8) (Vascular anticoagulant-beta) (VAC-beta)	ANXA8 ANX8	327	P13928;	1W3W;1W45;	No	No	No
P14136	Glial fibrillary acidic protein (GFAP)	GFAP	432	P14136;	6A9P;	No	No	No
P14635	G2/mitotic-specific cyclin-B1	CCNB1 CCNB	433	P14635;	2B9R;2JGZ;4Y72;4YC3;5HQ0;5LQF;6GU2;6GU3;6GU4;7NJ0;	No	No	No
P14649	Myosin light chain 6B (Myosin light chain 1 slow-twitch muscle A isoform) (MLC1sa) (Smooth muscle and nonmuscle myosin light chain alkali 6B)	MYL6B MLC1SA	208	P14649;	1OE9;1W7I;1W7J;7PLT;7PLU;7PLV;7PLW;7PLX;7PLY;7PLZ;7PM0;7PM1;7PM2;7PM5;7PM6;7PM7;7PM8;7PM9;7PMA;7PMB;7PMC;7PMD;7PME;7PMF;7PMG;7PMH;7PMI;7PMJ;7PML;	No	No	No
P14651	Homeobox protein Hox-B3 (Homeobox protein Hox-2.7) (Homeobox protein Hox-2G)	HOXB3 HOX2G	431	P14651;	n/a	No	No	No
P14652	Homeobox protein Hox-B2 (Homeobox protein Hox-2.8) (Homeobox protein Hox-2H) (K8)	HOXB2 HOX2H	356	P14652;	n/a	No	No	No
P14780	Matrix metalloproteinase-9 (MMP-9) (EC 3.4.24.35) (92 kDa gelatinase) (92 kDa type IV collagenase) (Gelatinase B) (GELB) [Cleaved into: 67 kDa matrix metalloproteinase-9; 82 kDa matrix metalloproteinase-9]	MMP9 CLG4B	707	P14780;	1GKC;1GKD;1ITV;1L6J;2OVX;2OVZ;2OW0;2OW1;2OW2;4H1Q;4H2E;4H3X;4H82;4HMA;4JIJ;4JQG;4WZV;4XCT;5CUH;5I12;5TH6;5TH9;5UE3;5UE4;6ESM;	No	No	No
P14902	Indoleamine 2,3-dioxygenase 1 (IDO-1) (EC 1.13.11.52) (Indoleamine-pyrrole 2,3-dioxygenase)	IDO1 IDO INDO	403	P14902;	2D0T;2D0U;4PK5;4PK6;4U72;4U74;5EK2;5EK3;5EK4;5ETW;5WHR;5WMU;5WMV;5WMW;5WMX;5WN8;5XE1;6AZU;6AZV;6AZW;6CXU;6CXV;6DPQ;6DPR;6E35;6E40;6E41;6E42;6E43;6E44;6E45;6E46;6F0A;6KOF;6KPS;6KW7;6MQ6;6O3I;6PU7;6PZ1;6R63;6UBP;6V52;6WJY;6WPE;6X5Y;7A62;7AH4;7AH5;7AH6;7B1O;7E0O;7E0P;7E0Q;7E0S;7E0T;7E0U;7M63;7M7D;7NGE;7P0N;7P0R;7RRB;7RRC;7RRD;7ZV3;8ABX;	No	No	No
P14921	Protein C-ets-1 (p54)	ETS1 EWSR2	441	P14921;	1GVJ;2NNY;2STT;2STW;3MFK;3RI4;3WTS;3WTT;3WTU;3WTV;3WTW;3WTX;3WTY;3WTZ;3WU0;3WU1;4L0Y;4L0Z;4L18;4LG0;5ZMC;	No	No	No
P15018	Leukemia inhibitory factor (LIF) (Differentiation-stimulating factor) (D factor) (Melanoma-derived LPL inhibitor) (MLPLI) (Emfilermin)	LIF HILDA	202	P15018;	1EMR;1PVH;2Q7N;7N0A;	No	No	No
P15036	Protein C-ets-2	ETS2	469	P15036;	4BQA;4MHV;	No	No	No
P15313	V-type proton ATPase subunit B, kidney isoform (V-ATPase subunit B 1) (Endomembrane proton pump 58 kDa subunit) (Vacuolar proton pump subunit B 1)	ATP6V1B1 ATP6B1 VATB VPP3	513	P15313;	n/a	No	No	No
P15407	Fos-related antigen 1 (FRA-1)	FOSL1 FRA1	271	P15407;	n/a	No	No	No
P15408	Fos-related antigen 2 (FRA-2)	FOSL2 FRA2	326	P15408;	n/a	No	No	No
P15498	Proto-oncogene vav	VAV1 VAV	845	P15498;	2CRH;2LCT;2MC1;2ROR;3BJI;3KY9;6NEW;6NF1;6NFA;	No	No	No
P15882	N-chimaerin (A-chimaerin) (Alpha-chimerin) (N-chimerin) (NC) (Rho GTPase-activating protein 2)	CHN1 ARHGAP2 CHN	459	P15882;	2OSA;3CXL;	No	No	No
P15923	Transcription factor E2-alpha (Class B basic helix-loop-helix protein 21) (bHLHb21) (Immunoglobulin enhancer-binding factor E12/E47) (Immunoglobulin transcription factor 1) (Kappa-E2-binding factor) (Transcription factor 3) (TCF-3) (Transcription factor ITF-1)	TCF3 BHLHB21 E2A ITF1	654	P15923;	2MH0;2YPA;2YPB;3U5V;6MGN;	No	No	No
P16104	Histone H2AX (H2a/x) (Histone H2A.X)	H2AX H2AFX	143	P16104;	1YDP;2AZM;2D31;2DYP;3SHV;3SQD;3SZM;3U3Z;6K1I;6K1J;6K1K;6ZWK;	No	No	No
P16403	Histone H1.2 (Histone H1c) (Histone H1d) (Histone H1s-1)	H1-2 H1F2 HIST1H1C	213	P16403;	n/a	No	No	No
P16415	Zinc finger protein 823 (Zinc finger protein ZFP-36)	ZNF823 ZFP36	610	P16415;	n/a	No	No	No
P16455	Methylated-DNA--protein-cysteine methyltransferase (EC 2.1.1.63) (6-O-methylguanine-DNA methyltransferase) (MGMT) (O-6-methylguanine-DNA-alkyltransferase)	MGMT	207	P16455;	1EH6;1EH7;1EH8;1QNT;1T38;1T39;1YFH;	No	No	No
P16885	1-phosphatidylinositol 4,5-bisphosphate phosphodiesterase gamma-2 (EC 3.1.4.11) (Phosphoinositide phospholipase C-gamma-2) (Phospholipase C-IV) (PLC-IV) (Phospholipase C-gamma-2) (PLC-gamma-2)	PLCG2	1265	P16885;	2K2J;2W2W;2W2X;	No	No	No
P17038	Zinc finger protein 43 (Zinc finger protein 39) (Zinc finger protein HTF6) (Zinc finger protein KOX27)	ZNF43 KOX27 ZNF39 ZNF39L1	809	P17038;	n/a	No	No	No
P17275	Transcription factor JunB (Transcription factor AP-1 subunit JunB)	JUNB	347	P17275;	n/a	No	No	No
P17481	Homeobox protein Hox-B8 (Homeobox protein Hox-2.4) (Homeobox protein Hox-2D)	HOXB8 HOX2D	243	P17481;	n/a	No	No	No
P17482	Homeobox protein Hox-B9 (Homeobox protein Hox-2.5) (Homeobox protein Hox-2E)	HOXB9 HOX2E	250	P17482;	n/a	No	No	No
P17483	Homeobox protein Hox-B4 (Homeobox protein Hox-2.6) (Homeobox protein Hox-2F)	HOXB4 HOX2F	251	P17483;	n/a	No	No	No
P17509	Homeobox protein Hox-B6 (Homeobox protein Hox-2.2) (Homeobox protein Hox-2B) (Homeobox protein Hu-2)	HOXB6 HOX2B	224	P17509;	n/a	No	No	No
P17655	Calpain-2 catalytic subunit (EC 3.4.22.53) (Calcium-activated neutral proteinase 2) (CANP 2) (Calpain M-type) (Calpain large polypeptide L2) (Calpain-2 large subunit) (Millimolar-calpain) (M-calpain)	CAPN2 CANPL2	700	P17655;	1KFU;1KFX;2NQA;	No	No	No
P17676	CCAAT/enhancer-binding protein beta (C/EBP beta) (Liver activator protein) (LAP) (Liver-enriched inhibitory protein) (LIP) (Nuclear factor NF-IL6) (Transcription factor 5) (TCF-5)	CEBPB TCF5 PP9092	345	P17676;	1GTW;1GU4;1GU5;1H88;1H89;1H8A;1HJB;1IO4;2E42;2E43;6MG1;6MG2;6MG3;7L4V;	No	No	No
P17947	Transcription factor PU.1 (31 kDa-transforming protein)	SPI1	270	P17947;	n/a	No	No	No
P18206	Vinculin (Metavinculin) (MV)	VCL	1134	P18206;	1RKC;1RKE;1SYQ;1TR2;1YDI;2GWW;2HSQ;2IBF;3H2U;3H2V;3JBK;3MYI;3RF3;3S90;3TJ5;3TJ6;3VF0;4DJ9;4EHP;4LN2;4LNP;4PR9;5L0C;5L0D;5L0F;5L0G;5L0H;5L0I;5L0J;5O2Q;6FUY;6UPW;7KTT;7KTU;7KTV;7KTW;	No	No	No
P18847	Cyclic AMP-dependent transcription factor ATF-3 (cAMP-dependent transcription factor ATF-3) (Activating transcription factor 3)	ATF3	181	P18847;	n/a	No	No	No
P19012	Keratin, type I cytoskeletal 15 (Cytokeratin-15) (CK-15) (Keratin-15) (K15)	KRT15 KRTB	456	P19012;	n/a	No	No	No
P19105	Myosin regulatory light chain 12A (Epididymis secretory protein Li 24) (HEL-S-24) (MLC-2B) (Myosin RLC) (Myosin regulatory light chain 2, nonsarcomeric) (Myosin regulatory light chain MRLC3)	MYL12A MLCB MRLC3 RLC	171	P19105;	n/a	No	No	No
P19429	Troponin I, cardiac muscle (Cardiac troponin I)	TNNI3 TNNC1	210	P19429;	1J1D;1J1E;1LXF;1MXL;1OZS;2KGB;2KRD;2L1R;2MZP;2N7L;4Y99;5VLN;5W88;5WCL;6KN7;6KN8;6MV3;7JGI;7SC2;7SC3;7SUP;7SVC;7SWG;7SWI;7SXC;7SXD;7UH9;7UHA;	No	No	No
P19484	Transcription factor EB (Class E basic helix-loop-helix protein 35) (bHLHe35)	TFEB BHLHE35	476	P19484;	n/a	No	No	No
P19622	Homeobox protein engrailed-2 (Homeobox protein en-2) (Hu-En-2)	EN2	333	P19622;	n/a	No	No	No
P19878	Neutrophil cytosol factor 2 (NCF-2) (67 kDa neutrophil oxidase factor) (NADPH oxidase activator 2) (Neutrophil NADPH oxidase factor 2) (p67-phox)	NCF2 NOXA2 P67PHOX	526	P19878;	1E96;1HH8;1K4U;1OEY;1WM5;2DMO;	No	No	No
P19971	Thymidine phosphorylase (TP) (EC 2.4.2.4) (Gliostatin) (Platelet-derived endothelial cell growth factor) (PD-ECGF) (TdRPase)	TYMP ECGF1	482	P19971;	1UOU;2J0F;2WK5;2WK6;	No	No	No
P20061	Transcobalamin-1 (TC-1) (Haptocorrin) (HC) (Protein R) (Transcobalamin I) (TC I) (TCI)	TCN1 TC1	433	P20061;	4KKI;4KKJ;	No	No	No
P20062	Transcobalamin-2 (TC-2) (Transcobalamin II) (TC II) (TCII)	TCN2 TC2	427	P20062;	2BB5;4ZRP;4ZRQ;5NO0;5NP4;5NRP;5NSA;7QBD;7QBE;7QBF;7QBG;	No	No	No
P20248	Cyclin-A2 (Cyclin-A) (Cyclin A)	CCNA2 CCN1 CCNA	432	P20248;	1E9H;1FIN;1FVV;1GY3;1H1P;1H1Q;1H1R;1H1S;1H24;1H25;1H26;1H27;1H28;1JST;1JSU;1OGU;1OI9;1OIU;1OIY;1OKV;1OKW;1OL1;1OL2;1P5E;1PKD;1QMZ;1URC;1VYW;2BKZ;2BPM;2C4G;2C5N;2C5O;2C5V;2C5X;2C6T;2CCH;2CCI;2CJM;2I40;2IW6;2IW8;2IW9;2UUE;2UZB;2UZD;2UZE;2UZL;2V22;2WEV;2WFY;2WHB;2WIH;2WIP;2WMA;2WMB;2WPA;2WXV;2X1N;3EID;3EJ1;3EOC;3F5X;4BCK;4BCM;4BCN;4BCP;4CFM;4CFN;4CFU;4CFV;4CFW;4CFX;4EOI;4EOJ;4EOK;4EOL;4EOM;4EON;4EOO…	No	No	No
P20591	Interferon-induced GTP-binding protein Mx1 (Interferon-induced protein p78) (IFI-78K) (Interferon-regulated resistance GTP-binding protein MxA) (Myxoma resistance protein 1) (Myxovirus resistance protein 1) [Cleaved into: Interferon-induced GTP-binding protein Mx1, N-terminally processed]	MX1	662	P20591;	3LJB;3SZR;3ZYS;4P4S;4P4T;4P4U;5GTM;	No	No	No
P20592	Interferon-induced GTP-binding protein Mx2 (Interferon-regulated resistance GTP-binding protein MxB) (Myxovirus resistance protein 2) (p78-related protein)	MX2	715	P20592;	4WHJ;4X0R;5UOT;	No	No	No
P20674	Cytochrome c oxidase subunit 5A, mitochondrial (Cytochrome c oxidase polypeptide Va)	COX5A	150	P20674;	5Z62;	No	No	No
P20700	Lamin-B1	LMNB1 LMN2 LMNB	586	P20700;	2KPW;3JT0;3TYY;3UMN;5VVX;7DTG;	No	No	No
P20719	Homeobox protein Hox-A5 (Homeobox protein Hox-1C)	HOXA5 HOX1C	270	P20719;	n/a	No	No	No
P20749	B-cell lymphoma 3 protein (BCL-3) (Proto-oncogene BCL3)	BCL3 BCL4 D19S37	454	P20749;	1K1A;1K1B;	No	No	No
P20807	Calpain-3 (EC 3.4.22.54) (Calcium-activated neutral proteinase 3) (CANP 3) (Calpain L3) (Calpain p94) (Muscle-specific calcium-activated neutral protease 3) (New calpain 1) (nCL-1)	CAPN3 CANP3 CANPL3 NCL1	821	P20807;	4OKH;6BDT;6BGP;6BJD;6BKJ;	No	No	No
P20809	Interleukin-11 (IL-11) (Adipogenesis inhibitory factor) (AGIF) (Oprelvekin)	IL11	199	P20809;	4MHL;6O4O;	No	No	No
P20813	Cytochrome P450 2B6 (EC 1.14.13.-) (1,4-cineole 2-exo-monooxygenase) (CYPIIB6) (Cytochrome P450 IIB1)	CYP2B6	491	P20813;	3IBD;3QOA;3QU8;3UA5;4I91;4RQL;4RRT;4ZV8;5UAP;5UDA;5UEC;5UFG;5WBG;	No	No	No
P20815	Cytochrome P450 3A5 (EC 1.14.14.1) (CYPIIIA5) (Cytochrome P450-PCN3)	CYP3A5	502	P20815;	5VEU;	No	No	No
P20823	Hepatocyte nuclear factor 1-alpha (HNF-1-alpha) (HNF-1A) (Liver-specific transcription factor LF-B1) (LFB1) (Transcription factor 1) (TCF-1)	HNF1A TCF1	631	P20823;	1IC8;2GYP;	No	No	No
P22674	Cyclin-O	CCNO	350	P22674;	n/a	No	No	No
P22676	Calretinin (CR) (29 kDa calbindin)	CALB2 CAB29	271	P22676;	n/a	No	No	No
P22749	Granulysin (Lymphokine LAG-2) (Protein NKG5) (T-cell activation protein 519)	GNLY LAG2 NKG5 TLA519	145	P22749;	1L9L;	No	No	No
P23193	Transcription elongation factor A protein 1 (Transcription elongation factor S-II protein 1) (Transcription elongation factor TFIIS.o)	TCEA1 GTF2S TFIIS	301	P23193;	1TFI;3NDQ;5IY6;5IY7;5IY8;5IYA;5IYB;5IYC;6O9L;6ZUY;6ZV4;7CNF;	No	No	No
P23219	Prostaglandin G/H synthase 1 (EC 1.14.99.1) (Cyclooxygenase-1) (COX-1) (Prostaglandin H2 synthase 1) (PGH synthase 1) (PGHS-1) (PHS 1) (Prostaglandin-endoperoxide synthase 1)	PTGS1 COX1	599	P23219;	6Y3C;	No	No	No
P23297	Protein S100-A1 (S-100 protein alpha chain) (S-100 protein subunit alpha) (S100 calcium-binding protein A1)	S100A1 S100A	94	P23297;	2L0P;2LHL;2LLS;2LLT;2LLU;2LP2;2LP3;2LUX;2M3W;5K89;	No	No	No
P23381	Tryptophan--tRNA ligase, cytoplasmic (EC 6.1.1.2) (Interferon-induced protein 53) (IFP53) (Tryptophanyl-tRNA synthetase) (TrpRS) (hWRS) [Cleaved into: T1-TrpRS; T2-TrpRS]	WARS1 IFI53 WARS WRS	471	P23381;	1O5T;1R6T;1R6U;1ULH;2AKE;2AZX;2DR2;2QUH;2QUI;2QUJ;2QUK;5UJI;5UJJ;	No	No	No
P23497	Nuclear autoantigen Sp-100 (Nuclear dot-associated Sp100 protein) (Speckled 100 kDa)	SP100	879	P23497;	1H5P;4PTB;5FB0;5FB1;5PWE;5PWF;5PWG;5PWH;5PWI;5PWJ;5PWK;5PWL;5PWM;5PWN;5PWO;5PWP;5PWQ;5PWR;5PWS;5PWT;5PWU;5PWV;5PWW;5PWX;5PWY;5PWZ;5PX0;5PX1;5PX2;5PX3;5PX4;5PX5;5PX6;5PX7;5PX8;5PX9;5PXA;5PXB;5PXC;5PXD;5PXE;5PXF;5PXG;5PXH;5PXI;5PXJ;5PXK;5PXL;5PXM;5PXN;5PXO;5PXP;5PXQ;5PXR;5PXS;5PXT;5PXU;5PXV;5PXW;5PXX;5PXY;5PXZ;5PY0;5PY1;5PY2;5PY3;5PY4;5PY5;5PY6;5PY7;5PY8;5PY9;5PYA;5PYB;5PYC;5PYD;5PYE;5PYF;5PYG;5PYH…	No	No	No
P23610	40-kDa huntingtin-associated protein (HAP40) (CpG island protein) (Factor VIII intron 22 protein)	F8A1; F8A2; F8A3	371	P23610;	6EZ8;6X9O;7DXJ;7DXK;	No	No	No
P23743	Diacylglycerol kinase alpha (DAG kinase alpha) (EC 2.7.1.107) (80 kDa diacylglycerol kinase) (Diglyceride kinase alpha) (DGK-alpha)	DGKA DAGK DAGK1	735	P23743;	1TUZ;6IIE;	No	No	No
P23760	Paired box protein Pax-3 (HuP2)	PAX3 HUP2	479	P23760;	3CMY;	No	No	No
P24001	Interleukin-32 (IL-32) (Natural killer cells protein 4) (Tumor necrosis factor alpha-inducing factor)	IL32 NK4 TAIF	234	P24001;	n/a	No	No	No
P24385	G1/S-specific cyclin-D1 (B-cell lymphoma 1 protein) (BCL-1) (BCL-1 oncogene) (PRAD1 oncogene)	CCND1 BCL1 PRAD1	295	P24385;	2W96;2W99;2W9F;2W9Z;5VZU;6P8E;6P8F;6P8G;6P8H;	No	No	No
P24844	Myosin regulatory light polypeptide 9 (20 kDa myosin light chain) (LC20) (MLC-2C) (Myosin RLC) (Myosin regulatory light chain 2, smooth muscle isoform) (Myosin regulatory light chain 9) (Myosin regulatory light chain MRLC1)	MYL9 MLC2 MRLC1 MYRL2	172	P24844;	n/a	No	No	No
P24864	G1/S-specific cyclin-E1	CCNE1 CCNE	410	P24864;	1W98;5L2W;7KJS;	No	No	No
P25098	Beta-adrenergic receptor kinase 1 (Beta-ARK-1) (EC 2.7.11.15) (G-protein coupled receptor kinase 2)	GRK2 ADRBK1 BARK BARK1	689	P25098;	1BAK;3CIK;3KRW;3KRX;3V5W;4MK0;4PNK;5HE1;5UKK;5UKL;5UUU;5UVC;5WG3;5WG4;5WG5;6C2Y;6U7C;7K7L;7K7Z;7PWD;	No	No	No
P25205	DNA replication licensing factor MCM3 (EC 3.6.4.12) (DNA polymerase alpha holoenzyme-associated protein P1) (P1-MCM3) (RLF subunit beta) (p102)	MCM3	808	P25205;	6XTX;6XTY;7PFO;7PLO;	No	No	No
P25685	DnaJ homolog subfamily B member 1 (DnaJ protein homolog 1) (Heat shock 40 kDa protein 1) (HSP40) (Heat shock protein 40) (Human DnaJ protein 1) (hDj-1)	DNAJB1 DNAJ1 HDJ1 HSPF1	340	P25685;	1HDJ;2QLD;3AGX;3AGY;3AGZ;4WB7;6BYR;6WJF;6WJG;6Z5N;7NDX;	No	No	No
P25774	Cathepsin S (EC 3.4.22.27)	CTSS	331	P25774;	1GLO;1MS6;1NPZ;1NQC;2C0Y;2F1G;2FQ9;2FRA;2FRQ;2FT2;2FUD;2FYE;2G6D;2G7Y;2H7J;2HH5;2HHN;2HXZ;2OP3;2R9M;2R9N;2R9O;3IEJ;3N3G;3N4C;3OVX;4P6E;4P6G;5QBU;5QBV;5QBW;5QBX;5QBY;5QBZ;5QC0;5QC1;5QC2;5QC3;5QC4;5QC5;5QC6;5QC7;5QC8;5QC9;5QCA;5QCB;5QCC;5QCD;5QCE;5QCF;5QCG;5QCH;5QCI;5QCJ;6YYN;6YYO;6YYP;6YYQ;6YYR;	No	No	No
P25815	Protein S100-P (Migration-inducing gene 9 protein) (MIG9) (Protein S100-E) (S100 calcium-binding protein P)	S100P S100E	95	P25815;	1J55;1OZO;2MJW;7NMI;	No	No	No
P25963	NF-kappa-B inhibitor alpha (I-kappa-B-alpha) (IkB-alpha) (IkappaBalpha) (Major histocompatibility complex enhancer-binding protein MAD3)	NFKBIA IKBA MAD3 NFKBI	317	P25963;	1IKN;1NFI;6TTU;6Y1J;	No	No	No
P26045	Tyrosine-protein phosphatase non-receptor type 3 (EC 3.1.3.48) (Protein-tyrosine phosphatase H1) (PTP-H1)	PTPN3 PTPH1	913	P26045;	2B49;4QUM;4QUN;4RH5;4RH9;4RHG;4RI4;4RI5;4S0G;6HKS;6T36;	No	No	No
P26440	Isovaleryl-CoA dehydrogenase, mitochondrial (IVD) (EC 1.3.8.4) (Butyryl-CoA dehydrogenase) (EC 1.3.8.1)	IVD	426	P26440;	1IVH;	No	No	No
P26447	Protein S100-A4 (Calvasculin) (Metastasin) (Placental calcium-binding protein) (Protein Mts1) (S100 calcium-binding protein A4)	S100A4 CAPL MTS1	101	P26447;	1M31;2LNK;2MRD;2Q91;3C1V;3CGA;3KO0;3M0W;3ZWH;4CFQ;4CFR;4ETO;4HSZ;5LPU;6T58;	No	No	No
P26583	High mobility group protein B2 (High mobility group protein 2) (HMG-2)	HMGB2 HMG2	209	P26583;	n/a	No	No	No
P27482	Calmodulin-like protein 3 (CaM-like protein) (CLP) (Calmodulin-related protein NB-1)	CALML3	149	P27482;	1GGZ;	No	No	No
P27986	Phosphatidylinositol 3-kinase regulatory subunit alpha (PI3-kinase regulatory subunit alpha) (PI3K regulatory subunit alpha) (PtdIns-3-kinase regulatory subunit alpha) (Phosphatidylinositol 3-kinase 85 kDa regulatory subunit alpha) (PI3-kinase subunit p85-alpha) (PtdIns-3-kinase regulatory subunit p85-alpha)	PIK3R1 GRB1	724	P27986;	1A0N;1AZG;1H9O;1PBW;1PHT;1PIC;1PKS;1PKT;2IUG;2IUH;2IUI;2RD0;2V1Y;3HHM;3HIZ;3I5R;3I5S;4A55;4JPS;4L1B;4L23;4L2Y;4OVU;4OVV;4WAF;4YKN;4ZOP;5AUL;5FI4;5GJI;5ITD;5M6U;5SW8;5SWG;5SWO;5SWP;5SWR;5SWT;5SX8;5SX9;5SXA;5SXB;5SXC;5SXD;5SXE;5SXF;5SXI;5SXJ;5SXK;5UBT;5UK8;5UKJ;5UL1;5VLR;5XGH;5XGI;5XGJ;6NCT;6PYR;6PYU;7CIO;7LM2;7LQ1;7MYN;7MYO;7PG5;7PG6;7RNS;7TZ7;	No	No	No
P28039	Acyloxyacyl hydrolase (EC 3.1.1.77) [Cleaved into: Acyloxyacyl hydrolase small subunit; Acyloxyacyl hydrolase large subunit]	AOAH	575	P28039;	5W78;5W7C;	No	No	No
P28358	Homeobox protein Hox-D10 (Homeobox protein Hox-4D) (Homeobox protein Hox-4E)	HOXD10 HOX4D HOX4E	340	P28358;	n/a	No	No	No
P28360	Homeobox protein MSX-1 (Homeobox protein Hox-7) (Msh homeobox 1-like protein)	MSX1 HOX7	303	P28360;	n/a	No	No	No
P28562	Dual specificity protein phosphatase 1 (EC 3.1.3.16) (EC 3.1.3.48) (Dual specificity protein phosphatase hVH1) (Mitogen-activated protein kinase phosphatase 1) (MAP kinase phosphatase 1) (MKP-1) (Protein-tyrosine phosphatase CL100)	DUSP1 CL100 MKP1 PTPN10 VH1	367	P28562;	6APX;6D65;6D66;6D67;	No	No	No
P28676	Grancalcin	GCA GCL	217	P28676;	1F4O;1F4Q;1K94;1K95;	No	No	No
P29034	Protein S100-A2 (CAN19) (Protein S-100L) (S100 calcium-binding protein A2)	S100A2 S100L	98	P29034;	2RGI;4DUQ;	No	No	No
P29374	AT-rich interactive domain-containing protein 4A (ARID domain-containing protein 4A) (Retinoblastoma-binding protein 1) (RBBP-1)	ARID4A RBBP1 RBP1	1257	P29374;	2LCC;2MAM;2YRV;6BPH;6L87;7SMC;7V8N;	No	No	No
P29375	Lysine-specific demethylase 5A (EC 1.14.11.67) (Histone demethylase JARID1A) (Jumonji/ARID domain-containing protein 1A) (Retinoblastoma-binding protein 2) (RBBP-2) ([histone H3]-trimethyl-L-lysine(4) demethylase 5A)	KDM5A JARID1A RBBP2 RBP2	1690	P29375;	2JXJ;2KGG;2KGI;3GL6;5C11;5CEH;5E6H;5ISL;5IVB;5IVC;5IVE;5IVF;5IVJ;5IVV;5IVY;5IW0;5IWF;5K4L;5V9P;5V9T;6BGU;6BGV;6BGW;6BGX;6BGY;6BGZ;6BH0;6BH1;6BH2;6BH3;6BH4;6BH5;6DQ4;6DQ5;6DQ6;6DQ7;6DQ8;6DQ9;6DQA;6DQB;6DQC;6DQD;6DQE;6DQF;7KLO;7KLR;	No	No	No
P29466	Caspase-1 (CASP-1) (EC 3.4.22.36) (Interleukin-1 beta convertase) (IL-1BC) (Interleukin-1 beta-converting enzyme) (ICE) (IL-1 beta-converting enzyme) (p45) [Cleaved into: Caspase-1 subunit p20; Caspase-1 subunit p10]	CASP1 IL1BC IL1BCE	404	P29466;	1BMQ;1IBC;1ICE;1RWK;1RWM;1RWN;1RWO;1RWP;1RWV;1RWW;1RWX;1SC1;1SC3;1SC4;2FQQ;2H48;2H4W;2H4Y;2H51;2H54;2HBQ;2HBR;2HBY;2HBZ;3D6F;3D6H;3D6M;3E4C;3NS7;5FNA;5MMV;5MTK;6BZ9;6F6R;6KN0;6PZP;6VIE;7KEU;	No	No	No
P29590	Protein PML (E3 SUMO-protein ligase PML) (EC 2.3.2.-) (Promyelocytic leukemia protein) (RING finger protein 71) (RING-type E3 SUMO transferase PML) (Tripartite motif-containing protein 19) (TRIM19)	PML MYL PP8675 RNF71 TRIM19	882	P29590;	1BOR;2MVW;2MWX;4WJN;4WJO;5YUF;6IMQ;6UYO;6UYP;6UYQ;6UYR;6UYS;6UYT;6UYU;6UYV;8DJI;	No	No	No
P29728	2'-5'-oligoadenylate synthase 2 ((2-5')oligo(A) synthase 2) (2-5A synthase 2) (EC 2.7.7.84) (p69 OAS / p71 OAS) (p69OAS / p71OAS)	OAS2	719	P29728;	n/a	No	No	No
P30050	60S ribosomal protein L12 (Large ribosomal subunit protein uL11)	RPL12	165	P30050;	4V6X;5A8L;5AJ0;6OLG;6ZM7;6ZME;6ZMI;6ZMO;7VB2;	No	No	No
P30153	Serine/threonine-protein phosphatase 2A 65 kDa regulatory subunit A alpha isoform (Medium tumor antigen-associated 61 kDa protein) (PP2A subunit A isoform PR65-alpha) (PP2A subunit A isoform R1-alpha)	PPP2R1A	589	P30153;	1B3U;2IE3;2IE4;2NPP;2NYL;2NYM;2PKG;3C5W;3DW8;3K7V;3K7W;4I5L;4I5N;4LAC;5W0W;6IUR;6NTS;7CUN;7K36;7PKS;7SOY;	No	No	No
P30279	G1/S-specific cyclin-D2	CCND2	289	P30279;	6EI2;	No	No	No
P30281	G1/S-specific cyclin-D3	CCND3	292	P30281;	3G33;	No	No	No
P30626	Sorcin (22 kDa protein) (CP-22) (CP22) (V19)	SRI	198	P30626;	1JUO;2JC2;4U8D;4UPG;4USL;5MRA;	No	No	No
P30679	Guanine nucleotide-binding protein subunit alpha-15 (G alpha-15) (G-protein subunit alpha-15) (Epididymis tissue protein Li 17E) (Guanine nucleotide-binding protein subunit alpha-16) (G alpha-16) (G-protein subunit alpha-16)	GNA15 GNA16	374	P30679;	n/a	No	No	No
P31151	Protein S100-A7 (Psoriasin) (S100 calcium-binding protein A7)	S100A7 PSOR1 S100A7C	101	P31151;	1PSR;2PSR;2WND;2WOR;2WOS;3PSR;4AQJ;	No	No	No
P31260	Homeobox protein Hox-A10 (Homeobox protein Hox-1.8) (Homeobox protein Hox-1H) (PL)	HOXA10 HOX1H	410	P31260;	n/a	No	No	No
P31267	Homeobox protein Hox-A6 (Homeobox protein Hox-1B)	HOXA6 HOX1B	233	P31267;	n/a	No	No	No
P31268	Homeobox protein Hox-A7 (Homeobox protein Hox 1.1) (Homeobox protein Hox-1A)	HOXA7 HOX1A	230	P31268;	n/a	No	No	No
P31269	Homeobox protein Hox-A9 (Homeobox protein Hox-1G)	HOXA9 HOX1G	272	P31269;	n/a	No	No	No
P31271	Homeobox protein Hox-A13 (Homeobox protein Hox-1J)	HOXA13 HOX1J	388	P31271;	2L7Z;	No	No	No
P31276	Homeobox protein Hox-C13 (Homeobox protein Hox-3G)	HOXC13 HOX3G	330	P31276;	n/a	No	No	No
P31277	Homeobox protein Hox-D11 (Homeobox protein Hox-4F)	HOXD11 HOX4F	338	P31277;	n/a	No	No	No
P31350	Ribonucleoside-diphosphate reductase subunit M2 (EC 1.17.4.1) (Ribonucleotide reductase small chain) (Ribonucleotide reductase small subunit)	RRM2 RR2	389	P31350;	2UW2;3OLJ;3VPM;3VPN;3VPO;	No	No	No
P31946	14-3-3 protein beta/alpha (Protein 1054) (Protein kinase C inhibitor protein 1) (KCIP-1) [Cleaved into: 14-3-3 protein beta/alpha, N-terminally processed]	YWHAB	246	P31946;	2BQ0;2C23;4DNK;5N10;6A5Q;6BYK;6GN0;6GN8;6GNJ;6GNK;6GNN;6HEP;	No	No	No
P31947	14-3-3 protein sigma (Epithelial cell marker protein 1) (Stratifin)	SFN HME1	248	P31947;	1YWT;1YZ5;3IQJ;3IQU;3IQV;3LW1;3MHR;3O8I;3P1N;3P1O;3P1P;3P1Q;3P1R;3P1S;3SMK;3SML;3SMM;3SMN;3SMO;3SP5;3SPR;3T0L;3T0M;3U9X;3UX0;4DAT;4DAU;4DHM;4DHN;4DHO;4DHP;4DHQ;4DHR;4DHS;4DHT;4DHU;4FL5;4FR3;4IEA;4JC3;4JDD;4QLI;4Y32;4Y3B;4Y5I;5BTV;5HF3;5LTW;5LU1;5LU2;5MHC;5MOC;5MXO;5MY9;5MYC;5N5R;5N5T;5N5W;5N75;5OEG;5OEH;5OK9;5OKF;5OM0;5OMA;6FAU;6FAV;6FAW;6FBB;6FBW;6FBY;6FCP;6FI4;6FI5;6G6X;6G8I;6G8J;6G8K;6G8L;6G8P…	No	No	No
P31949	Protein S100-A11 (Calgizzarin) (Metastatic lymph node gene 70 protein) (MLN 70) (Protein S100-C) (S100 calcium-binding protein A11) [Cleaved into: Protein S100-A11, N-terminally processed]	S100A11 MLN70 S100C	105	P31949;	1V4Z;1V50;2LUC;	No	No	No
P32242	Homeobox protein OTX1 (Orthodenticle homolog 1)	OTX1	354	P32242;	n/a	No	No	No
P32243	Homeobox protein OTX2 (Orthodenticle homolog 2)	OTX2	289	P32243;	n/a	No	No	No
P32322	Pyrroline-5-carboxylate reductase 1, mitochondrial (P5C reductase 1) (P5CR 1) (EC 1.5.1.2)	PYCR1	319	P32322;	2GER;2GR9;2GRA;2IZZ;5UAT;5UAU;5UAV;5UAW;5UAX;6XOZ;6XP0;6XP1;6XP2;6XP3;	No	No	No
P32455	Guanylate-binding protein 1 (EC 3.6.5.-) (GTP-binding protein 1) (GBP-1) (HuGBP-1) (Guanine nucleotide-binding protein 1) (Interferon-induced guanylate-binding protein 1)	GBP1	592	P32455;	1DG3;1F5N;2B8W;2B92;2BC9;2D4H;6K1Z;6K2D;6LOJ;	No	No	No
P32456	Guanylate-binding protein 2 (EC 3.6.5.-) (GTP-binding protein 2) (GBP-2) (HuGBP-2) (Guanine nucleotide-binding protein 2) (Interferon-induced guanylate-binding protein 2)	GBP2	591	P32456;	6VKJ;7E58;7M1S;	No	No	No
P32519	ETS-related transcription factor Elf-1 (E74-like factor 1)	ELF1	619	P32519;	n/a	No	No	No
P33076	MHC class II transactivator (CIITA) (EC 2.3.1.-) (EC 2.7.11.1)	CIITA MHC2TA	1130	P33076;	n/a	No	No	No
P33260	Cytochrome P450 2C18 (EC 1.14.14.1) (CYPIIC18) (Cytochrome P450-6b/29c)	CYP2C18	490	P33260;	2CIK;2H6P;	No	No	No
P33763	Protein S100-A5 (Protein S-100D) (S100 calcium-binding protein A5)	S100A5 S100D	92	P33763;	2KAX;2KAY;4DIR;6WN7;	No	No	No
P33764	Protein S100-A3 (Protein S-100E) (S100 calcium-binding protein A3)	S100A3 S100E	101	P33764;	1KSO;3NSI;3NSK;3NSL;3NSO;	No	No	No
P33981	Dual specificity protein kinase TTK (EC 2.7.12.1) (Phosphotyrosine picked threonine-protein kinase) (PYT)	TTK MPS1 MPS1L1	857	P33981;	2X9E;2ZMC;2ZMD;3CEK;3DBQ;3GFW;3H9F;3HMN;3HMO;3HMP;3VQU;3W1F;3WYX;3WYY;3WZJ;3WZK;4B94;4BHZ;4BI0;4BI1;4BI2;4C4E;4C4F;4C4G;4C4H;4C4I;4C4J;4CV8;4CV9;4CVA;4D2S;4H7X;4H7Y;4JS8;4JT3;4O6L;4ZEG;5AP0;5AP1;5AP2;5AP3;5AP4;5AP5;5AP6;5AP7;5EH0;5EHL;5EHO;5EHY;5EI2;5EI6;5EI8;5LJJ;5MRB;5N7V;5N84;5N87;5N93;5N9S;5NA0;5NAD;5NTT;5O91;6B4W;6GVJ;6H3K;6N6O;6TN9;6TNB;6TNC;6TND;7CHM;7CHN;7CHT;7CIL;7CJA;7CLH;7LQD;	No	No	No
P33991	DNA replication licensing factor MCM4 (EC 3.6.4.12) (CDC21 homolog) (P1-CDC21)	MCM4 CDC21	863	P33991;	6XTX;6XTY;7PFO;7PLO;	No	No	No
P33992	DNA replication licensing factor MCM5 (EC 3.6.4.12) (CDC46 homolog) (P1-CDC46)	MCM5 CDC46	734	P33992;	6XTX;6XTY;7PFO;7PLO;	No	No	No
P33993	DNA replication licensing factor MCM7 (EC 3.6.4.12) (CDC47 homolog) (P1.1-MCM3)	MCM7 CDC47 MCM2	719	P33993;	6XTX;6XTY;7PFO;7PLO;	No	No	No
P35228	Nitric oxide synthase, inducible (EC 1.14.13.39) (Hepatocyte NOS) (HEP-NOS) (Inducible NO synthase) (Inducible NOS) (iNOS) (NOS type II) (Peptidyl-cysteine S-nitrosylase NOS2)	NOS2 NOS2A	1153	P35228;	1NSI;2LL6;2NSI;3E7G;3EJ8;3HR4;4CX7;4NOS;5TP6;5XN3;6JWM;6JWN;6KEY;	No	No	No
P35249	Replication factor C subunit 4 (Activator 1 37 kDa subunit) (A1 37 kDa subunit) (Activator 1 subunit 4) (Replication factor C 37 kDa subunit) (RF-C 37 kDa subunit) (RFC37)	RFC4	363	P35249;	6VVO;7Z6H;	No	No	No
P35250	Replication factor C subunit 2 (Activator 1 40 kDa subunit) (A1 40 kDa subunit) (Activator 1 subunit 2) (Replication factor C 40 kDa subunit) (RF-C 40 kDa subunit) (RFC40)	RFC2	354	P35250;	6VVO;7Z6H;	No	No	No
P35354	Prostaglandin G/H synthase 2 (EC 1.14.99.1) (Cyclooxygenase-2) (COX-2) (PHS II) (Prostaglandin H2 synthase 2) (PGH synthase 2) (PGHS-2) (Prostaglandin-endoperoxide synthase 2)	PTGS2 COX2	604	P35354;	5F19;5F1A;5IKQ;5IKR;5IKT;5IKV;5KIR;	No	No	No
P35453	Homeobox protein Hox-D13 (Homeobox protein Hox-4I)	HOXD13 HOX4I	343	P35453;	n/a	No	No	No
P35548	Homeobox protein MSX-2 (Homeobox protein Hox-8)	MSX2 HOX8	267	P35548;	n/a	No	No	No
P35680	Hepatocyte nuclear factor 1-beta (HNF-1-beta) (HNF-1B) (Homeoprotein LFB3) (Transcription factor 2) (TCF-2) (Variant hepatic nuclear factor 1) (vHNF1)	HNF1B TCF2	557	P35680;	2DA6;2H8R;5K9S;	No	No	No
P35716	Transcription factor SOX-11	SOX11	441	P35716;	6T78;6T7A;6T7C;6T7D;	No	No	No
P35749	Myosin-11 (Myosin heavy chain 11) (Myosin heavy chain, smooth muscle isoform) (SMMHC)	MYH11 KIAA0866	1972	P35749;	n/a	No	No	No
P35789	Zinc finger protein 93 (Zinc finger protein 505) (Zinc finger protein HTF34)	ZNF93 ZNF505	620	P35789;	n/a	No	No	No
P35869	Aryl hydrocarbon receptor (Ah receptor) (AhR) (Class E basic helix-loop-helix protein 76) (bHLHe76)	AHR BHLHE76	848	P35869;	5NJ8;	No	No	No
P35900	Keratin, type I cytoskeletal 20 (Cytokeratin-20) (CK-20) (Keratin-20) (K20) (Protein IT)	KRT20	424	P35900;	n/a	No	No	No
P35913	Rod cGMP-specific 3',5'-cyclic phosphodiesterase subunit beta (GMP-PDE beta) (EC 3.1.4.35)	PDE6B PDEB	854	P35913;	n/a	No	No	No
P36402	Transcription factor 7 (TCF-7) (T-cell-specific transcription factor 1) (T-cell factor 1) (TCF-1)	TCF7 TCF1	384	P36402;	n/a	No	No	No
P37231	Peroxisome proliferator-activated receptor gamma (PPAR-gamma) (Nuclear receptor subfamily 1 group C member 3)	PPARG NR1C3	505	P37231;	1FM6;1FM9;1I7I;1K74;1KNU;1NYX;1PRG;1RDT;1WM0;1ZEO;1ZGY;2ATH;2F4B;2FVJ;2G0G;2G0H;2GTK;2HFP;2HWQ;2HWR;2I4J;2I4P;2I4Z;2OM9;2P4Y;2POB;2PRG;2Q59;2Q5P;2Q5S;2Q61;2Q6R;2Q6S;2Q8S;2QMV;2VSR;2VST;2VV0;2VV1;2VV2;2VV3;2VV4;2XKW;2YFE;2ZK0;2ZK1;2ZK2;2ZK3;2ZK4;2ZK5;2ZK6;2ZNO;2ZVT;3ADS;3ADT;3ADU;3ADV;3ADW;3ADX;3AN3;3AN4;3B0Q;3B0R;3B1M;3B3K;3BC5;3CDP;3CDS;3CS8;3CWD;3D6D;3DZU;3DZY;3E00;3ET0;3ET3;3FEJ;3FUR;3G9E;3GBK…	No	No	No
P37275	Zinc finger E-box-binding homeobox 1 (NIL-2-A zinc finger protein) (Negative regulator of IL2) (Transcription factor 8) (TCF-8)	ZEB1 AREB6 TCF8	1124	P37275;	2E19;	No	No	No
P37802	Transgelin-2 (Epididymis tissue protein Li 7e) (SM22-alpha homolog)	TAGLN2 KIAA0120 CDABP0035	199	P37802;	1WYM;	No	No	No
P39019	40S ribosomal protein S19 (Small ribosomal subunit protein eS19)	RPS19	145	P39019;	4UG0;4V6X;5A2Q;5AJ0;5FLX;5LKS;5OA3;5T2C;5VYC;6G18;6G4S;6G4W;6G51;6G53;6G5H;6G5I;6IP5;6IP6;6IP8;6OLE;6OLF;6OLG;6OLI;6OLZ;6OM0;6OM7;6QZP;6XA1;6Y0G;6Y2L;6Y57;6YBS;6Z6L;6Z6M;6Z6N;6ZLW;6ZM7;6ZME;6ZMI;6ZMO;6ZMT;6ZMW;6ZN5;6ZOJ;6ZOL;6ZON;6ZP4;6ZUO;6ZV6;6ZVH;6ZVJ;6ZXD;6ZXE;6ZXF;6ZXG;6ZXH;7A09;7K5I;7MQA;7QP6;7QP7;7TQL;	No	No	No
P39748	Flap endonuclease 1 (FEN-1) (EC 3.1.-.-) (DNase IV) (Flap structure-specific endonuclease 1) (Maturation factor 1) (MF1) (hFEN-1)	FEN1 RAD2	380	P39748;	1U7B;1UL1;3Q8K;3Q8L;3Q8M;3UVU;5E0V;5FV7;5K97;5KSE;5UM9;5ZOD;5ZOE;5ZOF;5ZOG;6TNZ;	No	No	No
P39900	Macrophage metalloelastase (MME) (EC 3.4.24.65) (Macrophage elastase) (ME) (hME) (Matrix metalloproteinase-12) (MMP-12)	MMP12 HME	470	P39900;	1JIZ;1JK3;1OS2;1OS9;1RMZ;1ROS;1UTT;1UTZ;1Y93;1YCM;1Z3J;2HU6;2JXY;2K2G;2K9C;2KRJ;2MLR;2MLS;2N8R;2OXU;2OXW;2OXZ;2POJ;2W0D;2WO8;2WO9;2WOA;2Z2D;3BA0;3EHX;3EHY;3F15;3F16;3F17;3F18;3F19;3F1A;3LIK;3LIL;3LIR;3LJG;3LK8;3LKA;3N2U;3N2V;3NX7;3RTS;3RTT;3TS4;3TSK;3UVC;4EFS;4GQL;4GR0;4GR3;4GR8;4GUY;4H30;4H49;4H76;4H84;4I03;4IJO;5CXA;5CZM;5D2B;5D3C;5I0L;5I2Z;5I3M;5I43;5I4O;5L79;5L7F;5LAB;5N5J;5N5K;6EKN;6ELA;6ENM…	No	No	No
P40227	T-complex protein 1 subunit zeta (TCP-1-zeta) (Acute morphine dependence-related protein 2) (CCT-zeta-1) (HTR3) (Tcp20)	CCT6A CCT6 CCTZ	531	P40227;	6NR8;6NR9;6NRA;6NRB;6NRC;6NRD;6QB8;7LUM;7LUP;7NVL;7NVM;7NVN;7NVO;	No	No	No
P40426	Pre-B-cell leukemia transcription factor 3 (Homeobox protein PBX3)	PBX3	434	P40426;	n/a	No	No	No
P40938	Replication factor C subunit 3 (Activator 1 38 kDa subunit) (A1 38 kDa subunit) (Activator 1 subunit 3) (Replication factor C 38 kDa subunit) (RF-C 38 kDa subunit) (RFC38)	RFC3	356	P40938;	6VVO;7Z6H;	No	No	No
P41002	Cyclin-F (F-box only protein 1)	CCNF FBX1 FBXO1	786	P41002;	n/a	No	No	No
P41134	DNA-binding protein inhibitor ID-1 (Class B basic helix-loop-helix protein 24) (bHLHb24) (Inhibitor of DNA binding 1) (Inhibitor of differentiation 1)	ID1 BHLHB24 ID	155	P41134;	n/a	No	No	No
P41161	ETS translocation variant 5 (Ets-related protein ERM)	ETV5 ERM	510	P41161;	4UNO;5ILV;	No	No	No
P41208	Centrin-2 (Caltractin isoform 1)	CETN2 CALT CEN2	172	P41208;	1M39;1ZMZ;2A4J;2GGM;2K2I;2OBH;	No	No	No
P41212	Transcription factor ETV6 (ETS translocation variant 6) (ETS-related protein Tel1) (Tel)	ETV6 TEL TEL1	452	P41212;	1JI7;1LKY;2DAO;2QAR;2QB0;2QB1;5L0P;7JU2;7N1O;7N2B;7TW7;7TW8;7TW9;	No	No	No
P41218	Myeloid cell nuclear differentiation antigen	MNDA	407	P41218;	2DBG;5H7Q;5WPZ;	No	No	No
P41219	Peripherin (Neurofilament 4)	PRPH NEF4 PRPH1	470	P41219;	n/a	No	No	No
P41235	Hepatocyte nuclear factor 4-alpha (HNF-4-alpha) (Nuclear receptor subfamily 2 group A member 1) (Transcription factor 14) (TCF-14) (Transcription factor HNF-4)	HNF4A HNF4 NR2A1 TCF14	474	P41235;	1PZL;3CBB;3FS1;4B7W;4IQR;6CHT;	No	No	No
P41970	ETS domain-containing protein Elk-3 (ETS-related protein ERP) (ETS-related protein NET) (Serum response factor accessory protein 2) (SAP-2) (SRF accessory protein 2)	ELK3 NET SAP2	407	P41970;	n/a	No	No	No
P42166	Lamina-associated polypeptide 2, isoform alpha (Thymopoietin isoform alpha) (TP alpha) (Thymopoietin-related peptide isoform alpha) (TPRP isoform alpha) [Cleaved into: Thymopoietin (TP) (Splenin); Thymopentin (TP5)]	TMPO LAP2	694	P42166;	1GJJ;1H9E;1H9F;	No	No	No
P42224	Signal transducer and activator of transcription 1-alpha/beta (Transcription factor ISGF-3 components p91/p84)	STAT1	750	P42224;	1BF5;1YVL;2KA6;3WWT;7NUF;8D3F;	No	No	No
P42226	Signal transducer and activator of transcription 6 (IL-4 Stat)	STAT6	847	P42226;	1OJ5;4Y5U;4Y5W;5D39;5NWM;5NWX;	No	No	No
P42331	Rho GTPase-activating protein 25 (Rho-type GTPase-activating protein 25)	ARHGAP25 KIAA0053	645	P42331;	1V89;	No	No	No
P42357	Histidine ammonia-lyase (Histidase) (EC 4.3.1.3)	HAL HIS	657	P42357;	n/a	No	No	No
P42568	Protein AF-9 (ALL1-fused gene from chromosome 9 protein) (Myeloid/lymphoid or mixed-lineage leukemia translocated to chromosome 3 protein) (YEATS domain-containing protein 3)	MLLT3 AF9 YEATS3	568	P42568;	2LM0;2MV7;2N4Q;2NDF;2NDG;4TMP;5HJB;5HJD;5YYF;6B7G;6L5Z;6LS6;6MIL;6MIM;7EIC;7EID;	No	No	No
P42768	Actin nucleation-promoting factor WAS (Wiskott-Aldrich syndrome protein) (WASp)	WAS IMD2	502	P42768;	1CEE;1EJ5;1T84;2A3Z;2K42;2OT0;	No	No	No
P42771	Cyclin-dependent kinase inhibitor 2A (Cyclin-dependent kinase 4 inhibitor A) (CDK4I) (Multiple tumor suppressor 1) (MTS-1) (p16-INK4a) (p16-INK4) (p16INK4A)	CDKN2A CDKN2 MTS1	156	P42771;	1A5E;1BI7;1DC2;2A5E;7OZT;	No	No	No
P42772	Cyclin-dependent kinase 4 inhibitor B (Multiple tumor suppressor 2) (MTS-2) (p14-INK4b) (p15-INK4b) (p15INK4B)	CDKN2B MTS2	138	P42772;	n/a	No	No	No
P42773	Cyclin-dependent kinase 4 inhibitor C (Cyclin-dependent kinase 6 inhibitor) (p18-INK4c) (p18-INK6)	CDKN2C CDKN6	168	P42773;	1BU9;1G3N;1IHB;1MX2;1MX4;1MX6;	No	No	No
P42785	Lysosomal Pro-X carboxypeptidase (EC 3.4.16.2) (Angiotensinase C) (Lysosomal carboxypeptidase C) (Proline carboxypeptidase) (Prolylcarboxypeptidase) (PRCP)	PRCP PCP	496	P42785;	3N2Z;	No	No	No
P43234	Cathepsin O (EC 3.4.22.42)	CTSO CTSO1	321	P43234;	n/a	No	No	No
P43235	Cathepsin K (EC 3.4.22.38) (Cathepsin O) (Cathepsin O2) (Cathepsin X)	CTSK CTSO CTSO2	329	P43235;	1ATK;1AU0;1AU2;1AU3;1AU4;1AYU;1AYV;1AYW;1BGO;1BY8;1MEM;1NL6;1NLJ;1Q6K;1SNK;1TU6;1U9V;1U9W;1U9X;1VSN;1YK7;1YK8;1YT7;2ATO;2AUX;2AUZ;2BDL;2R6N;3C9E;3H7D;3KW9;3KWB;3KWZ;3KX1;3O0U;3O1G;3OVZ;4DMX;4DMY;4N79;4N8W;4X6H;4X6I;4X6J;4YV8;4YVA;5J94;5JA7;5JH3;5TDI;5TUN;5Z5O;6ASH;6HGY;6PXF;6QBS;6QL8;6QLM;6QLW;6QLX;6QM0;7NXL;7NXM;7PCK;7QBL;7QBM;7QBN;7QBO;	No	No	No
P43246	DNA mismatch repair protein Msh2 (hMSH2) (MutS protein homolog 2)	MSH2	934	P43246;	2O8B;2O8C;2O8D;2O8E;2O8F;3THW;3THX;3THY;3THZ;	No	No	No
P43268	ETS translocation variant 4 (Adenovirus E1A enhancer-binding protein) (E1A-F) (Polyomavirus enhancer activator 3 homolog) (Protein PEA3)	ETV4 E1AF PEA3	484	P43268;	4CO8;4UUV;5ILU;	No	No	No
P43354	Nuclear receptor subfamily 4 group A member 2 (Immediate-early response protein NOT) (Orphan nuclear receptor NURR1) (Transcriptionally-inducible nuclear receptor)	NR4A2 NOT NURR1 TINUR	598	P43354;	1OVL;5Y41;5YD6;6DDA;6L6L;6L6Q;	No	No	No
P43356	Melanoma-associated antigen 2 (Cancer/testis antigen 1.2) (CT1.2) (MAGE-2 antigen)	MAGEA2 MAGE2 MAGEA2A; MAGEA2B MAGE2 MAGEA2	314	P43356;	n/a	No	No	No
P43357	Melanoma-associated antigen 3 (Antigen MZ2-D) (Cancer/testis antigen 1.3) (CT1.3) (MAGE-3 antigen)	MAGEA3 MAGE3	314	P43357;	1QEW;4V0P;5BRZ;	No	No	No
P43358	Melanoma-associated antigen 4 (Cancer/testis antigen 1.4) (CT1.4) (MAGE-4 antigen) (MAGE-41 antigen) (MAGE-X2 antigen)	MAGEA4 MAGE4	317	P43358;	1I4F;2WA0;6TRN;6TRO;	No	No	No
P43360	Melanoma-associated antigen 6 (Cancer/testis antigen 1.6) (CT1.6) (MAGE-6 antigen) (MAGE3B antigen)	MAGEA6 MAGE6	314	P43360;	n/a	No	No	No
P43362	Melanoma-associated antigen 9 (Cancer/testis antigen 1.9) (CT1.9) (MAGE-9 antigen)	MAGEA9 MAGE9 MAGEA9A; MAGEA9B	315	P43362;	n/a	No	No	No
P43365	Melanoma-associated antigen 12 (Cancer/testis antigen 1.12) (CT1.12) (MAGE-12 antigen) (MAGE12F antigen)	MAGEA12 MAGE12	314	P43365;	n/a	No	No	No
P43378	Tyrosine-protein phosphatase non-receptor type 9 (EC 3.1.3.48) (Protein-tyrosine phosphatase MEG2) (PTPase MEG2)	PTPN9	593	P43378;	2PA5;4GE2;4GE5;4GE6;4ICZ;6KZQ;6L03;	No	No	No
P43686	26S proteasome regulatory subunit 6B (26S proteasome AAA-ATPase subunit RPT3) (MB67-interacting protein) (MIP224) (Proteasome 26S subunit ATPase 4) (Tat-binding protein 7) (TBP-7)	PSMC4 MIP224 TBP7	418	P43686;	2DVW;5GJQ;5GJR;5L4G;5LN3;5M32;5T0C;5T0G;5T0H;5T0I;5T0J;5VFP;5VFQ;5VFR;5VFS;5VFT;5VFU;5VGZ;5VHF;5VHH;5VHI;5VHJ;5VHM;5VHN;5VHO;5VHP;5VHQ;5VHR;5VHS;6MSB;6MSD;6MSE;6MSG;6MSH;6MSJ;6MSK;6WJD;6WJN;7W37;7W38;7W39;7W3A;7W3B;7W3C;7W3F;7W3G;7W3H;7W3I;7W3J;7W3K;7W3M;	No	No	No
P45452	Collagenase 3 (EC 3.4.24.-) (Matrix metalloproteinase-13) (MMP-13)	MMP13	471	P45452;	1EUB;1FLS;1FM1;1PEX;1XUC;1XUD;1XUR;1YOU;1ZTQ;2D1N;2E2D;2OW9;2OZR;2PJT;2YIG;3ELM;3I7G;3I7I;3KEC;3KEJ;3KEK;3KRY;3LJZ;3O2X;3TVC;3WV1;3WV2;3WV3;3ZXH;456C;4A7B;4FU4;4FVL;4G0D;4JP4;4JPA;4L19;5B5O;5B5P;5BOT;5BOY;5BPA;5UWK;5UWL;5UWM;5UWN;7JU8;830C;	No	No	No
P46019	Phosphorylase b kinase regulatory subunit alpha, liver isoform (Phosphorylase kinase alpha L subunit)	PHKA2 PHKLA PYK	1235	P46019;	n/a	No	No	No
P46063	ATP-dependent DNA helicase Q1 (EC 3.6.4.12) (DNA helicase, RecQ-like type 1) (RecQ1) (DNA-dependent ATPase Q1) (RecQ protein-like 1)	RECQL RECQ1 RECQL1	649	P46063;	2V1X;2WWY;4U7D;6JTZ;	No	No	No
P46100	Transcriptional regulator ATRX (EC 3.6.4.12) (ATP-dependent helicase ATRX) (X-linked helicase II) (X-linked nuclear protein) (XNP) (Znf-HX)	ATRX RAD54L XH2	2492	P46100;	2JM1;2LBM;2LD1;3QL9;3QLA;3QLC;3QLN;4W5A;5GRQ;5Y18;5Y6O;6G0O;	No	No	No
P46782	40S ribosomal protein S5 (Small ribosomal subunit protein uS7) [Cleaved into: 40S ribosomal protein S5, N-terminally processed]	RPS5	204	P46782;	4UG0;4V6X;5A2Q;5AJ0;5FLX;5LKS;5OA3;5T2C;5VYC;6FEC;6G18;6G4S;6G4W;6G51;6G53;6G5H;6G5I;6IP5;6IP6;6IP8;6OLE;6OLF;6OLG;6OLI;6OLZ;6OM0;6OM7;6QZP;6XA1;6Y0G;6Y2L;6Y57;6YBS;6Z6L;6Z6M;6Z6N;6ZLW;6ZM7;6ZME;6ZMI;6ZMO;6ZMT;6ZMW;6ZN5;6ZOJ;6ZOL;6ZON;6ZP4;6ZUO;6ZV6;6ZVH;6ZVJ;6ZXD;6ZXE;6ZXF;6ZXG;6ZXH;7A09;7K5I;7MQ8;7MQ9;7MQA;7QP6;7QP7;7TQL;	No	No	No
P46783	40S ribosomal protein S10 (Small ribosomal subunit protein eS10)	RPS10	165	P46783;	4UG0;4V6X;5A2Q;5AJ0;5FLX;5LKS;5OA3;5T2C;5VYC;6FEC;6G51;6G53;6G5H;6G5I;6IP5;6IP6;6IP8;6OLE;6OLF;6OLG;6OLI;6OLZ;6OM0;6OM7;6QZP;6XA1;6Y0G;6Y2L;6Y57;6YBS;6Z6L;6Z6M;6Z6N;6ZLW;6ZM7;6ZME;6ZMI;6ZMO;6ZMT;6ZMW;6ZN5;6ZOJ;6ZOL;6ZON;6ZP4;6ZUO;6ZV6;6ZVH;6ZVJ;6ZXD;6ZXE;6ZXF;6ZXG;6ZXH;7A09;7K5I;7QP6;7QP7;	No	No	No
P47755	F-actin-capping protein subunit alpha-2 (CapZ alpha-2)	CAPZA2	286	P47755;	n/a	No	No	No
P47756	F-actin-capping protein subunit beta (CapZ beta)	CAPZB	272	P47756;	n/a	No	No	No
P47902	Homeobox protein CDX-1 (Caudal-type homeobox protein 1)	CDX1	265	P47902;	5LUX;	No	No	No
P47928	DNA-binding protein inhibitor ID-4 (Class B basic helix-loop-helix protein 27) (bHLHb27) (Inhibitor of DNA binding 4) (Inhibitor of differentiation 4)	ID4 BHLHB27	161	P47928;	n/a	No	No	No
P48431	Transcription factor SOX-2	SOX2	317	P48431;	1O4X;2LE4;6T7B;6T90;6WX7;6WX8;6WX9;6YOV;	No	No	No
P48436	Transcription factor SOX-9	SOX9	509	P48436;	4EUW;	No	No	No
P48443	Retinoic acid receptor RXR-gamma (Nuclear receptor subfamily 2 group B member 3) (Retinoid X receptor gamma)	RXRG NR2B3	463	P48443;	2GL8;7A79;	No	No	No
P48668	Keratin, type II cytoskeletal 6C (Cytokeratin-6C) (CK-6C) (Cytokeratin-6E) (CK-6E) (Keratin K6h) (Keratin-6C) (K6C) (Type-II keratin Kb12)	KRT6C KRT6E	564	P48668;	n/a	No	No	No
P48681	Nestin	NES Nbla00170	1621	P48681;	n/a	No	No	No
P49450	Histone H3-like centromeric protein A (Centromere autoantigen A) (Centromere protein A) (CENP-A)	CENPA	140	P49450;	3AN2;3NQJ;3NQU;3R45;3WTP;5CVD;5Z23;6BUZ;6C0W;6E0C;6E0P;6KDQ;6KDS;6L49;6MUO;6MUP;6O1D;6SE0;6SE6;6SEE;6SEF;6SEG;6TEM;7D20;7PII;7R5R;7U46;7U47;7U4D;7YWX;7YYH;	No	No	No
P49638	Alpha-tocopherol transfer protein (Alpha-TTP)	TTPA TPP1	278	P49638;	1OIP;1OIZ;1R5L;5MUE;5MUG;6ZPD;	No	No	No
P49643	DNA primase large subunit (DNA primase 58 kDa subunit) (p58)	PRIM2 PRIM2A	509	P49643;	3L9Q;3Q36;4BPU;4BPW;4BPX;4RR2;5DQO;5EXR;5F0Q;5F0S;5I7M;6DHW;7OPL;7U5C;8D0B;8D0K;	No	No	No
P49662	Caspase-4 (CASP-4) (EC 3.4.22.57) (ICE and Ced-3 homolog 2) (ICH-2) (ICE(rel)-II) (Mih1) (Protease TX) [Cleaved into: Caspase-4 subunit p10; Caspase-4 subunit p20]	CASP4 ICH2	377	P49662;	6KMZ;6NRY;	No	No	No
P49715	CCAAT/enhancer-binding protein alpha (C/EBP alpha)	CEBPA CEBP	358	P49715;	6DC0;	No	No	No
P49716	CCAAT/enhancer-binding protein delta (C/EBP delta) (Nuclear factor NF-IL6-beta) (NF-IL6-beta)	CEBPD	269	P49716;	n/a	No	No	No
P49736	DNA replication licensing factor MCM2 (EC 3.6.4.12) (Minichromosome maintenance protein 2 homolog) (Nuclear protein BM28)	MCM2 BM28 CCNL1 CDCL1 KIAA0030	904	P49736;	4UUZ;5BNV;5BNX;5BO0;5C3I;5JA4;6XTX;6XTY;6YA7;7CIZ;7CJ0;7PFO;7PLO;	No	No	No
P49795	Regulator of G-protein signaling 19 (RGS19) (G-alpha-interacting protein) (GAIP)	RGS19 GAIP GNAI3IP	217	P49795;	1CMZ;	No	No	No
P49796	Regulator of G-protein signaling 3 (RGP3) (RGS3)	RGS3	1198	P49796;	2F5Y;2OJ4;3FBK;	No	No	No
P49798	Regulator of G-protein signaling 4 (RGP4) (RGS4)	RGS4	205	P49798;	n/a	No	No	No
P49902	Cytosolic purine 5'-nucleotidase (EC 3.1.3.5) (EC 3.1.3.99) (Cytosolic 5'-nucleotidase II) (cN-II) (Cytosolic IMP/GMP-specific 5'-nucleotidase) (Cytosolic nucleoside phosphotransferase 5'N) (EC 2.7.1.77) (High Km 5'-nucleotidase)	NT5C2 NT5B NT5CP PNT5	561	P49902;	2J2C;2JC9;2JCM;2XCV;2XCW;2XCX;2XJB;2XJC;2XJD;2XJE;2XJF;4H4B;5CQZ;5CR7;5K7Y;5L4Z;5L50;5OPK;5OPL;5OPM;5OPN;5OPO;5OPP;6DD3;6DDB;6DDC;6DDH;6DDK;6DDL;6DDO;6DDQ;6DDX;6DDY;6DDZ;6DE0;6DE1;6DE2;6DE3;6FIR;6FIS;6FIU;6FIW;6FXH;	No	No	No
P50219	Motor neuron and pancreas homeobox protein 1 (Homeobox protein HB9)	MNX1 HLXB9	401	P50219;	n/a	No	No	No
P50222	Homeobox protein MOX-2 (Growth arrest-specific homeobox) (Mesenchyme homeobox 2)	MEOX2 GAX MOX2	304	P50222;	n/a	No	No	No
P50549	ETS translocation variant 1 (Ets-related protein 81)	ETV1 ER81	477	P50549;	4AVP;4BNC;5ILS;	No	No	No
P50995	Annexin A11 (56 kDa autoantigen) (Annexin XI) (Annexin-11) (Calcyclin-associated annexin 50) (CAP-50)	ANXA11 ANX11	505	P50995;	n/a	No	No	No
P51449	Nuclear receptor ROR-gamma (Nuclear receptor RZR-gamma) (Nuclear receptor subfamily 1 group F member 3) (RAR-related orphan receptor C) (Retinoid-related orphan receptor-gamma)	RORC NR1F3 RORG RZRG	518	P51449;	3B0W;3KYT;3L0J;3L0L;4NB6;4NIE;4QM0;4S14;4WLB;4WPF;4WQP;4XT9;4YMQ;4YPQ;4ZJR;4ZJW;4ZOM;5APH;5APJ;5APK;5AYG;5C4O;5C4S;5C4T;5C4U;5EJV;5ETH;5G42;5G43;5G44;5G45;5G46;5IXK;5IZ0;5K38;5K3L;5K3M;5K3N;5K6E;5K74;5LWP;5M96;5NI5;5NI7;5NI8;5NIB;5NTI;5NTK;5NTN;5NTP;5NTQ;5NTW;5NU1;5UFO;5UFR;5UHI;5VB3;5VB5;5VB6;5VB7;5VQK;5VQL;5W4R;5W4V;5X8Q;5YP5;5YP6;5ZA1;6A22;6B30;6B31;6B33;6BN6;6BR2;6BR3;6CN5;6CN6;6CVH;6E3E;6E3G…	No	No	No
P51531	Probable global transcription activator SNF2L2 (EC 3.6.4.-) (ATP-dependent helicase SMARCA2) (BRG1-associated factor 190B) (BAF190B) (Protein brahma homolog) (hBRM) (SNF2-alpha) (SWI/SNF-related matrix-associated actin-dependent regulator of chromatin subfamily A member 2)	SMARCA2 BAF190B BRM SNF2A SNF2L2	1590	P51531;	2DAT;4QY4;5DKC;5DKH;6EG2;6EG3;6HAX;6HAY;6HAZ;7Z6L;	No	No	No
P51589	Cytochrome P450 2J2 (EC 1.14.14.-) (Albendazole monooxygenase (hydroxylating)) (EC 1.14.14.74) (Albendazole monooxygenase (sulfoxide-forming)) (EC 1.14.14.73) (Arachidonic acid epoxygenase) (CYPIIJ2) (Hydroperoxy icosatetraenoate isomerase) (EC 5.4.4.7)	CYP2J2	502	P51589;	n/a	No	No	No
P51606	N-acylglucosamine 2-epimerase (AGE) (EC 5.1.3.8) (GlcNAc 2-epimerase) (N-acetyl-D-glucosamine 2-epimerase) (Renin-binding protein) (RnBP)	RENBP	417	P51606;	n/a	No	No	No
P51816	AF4/FMR2 family member 2 (Protein FMR-2) (FMR2P) (Protein Ox19)	AFF2 FMR2 OX19	1311	P51816;	n/a	No	No	No
P51826	AF4/FMR2 family member 3 (Lymphoid nuclear protein related to AF4) (Protein LAF-4)	AFF3 LAF4	1226	P51826;	n/a	No	No	No
P51911	Calponin-1 (Basic calponin) (Calponin H1, smooth muscle)	CNN1	297	P51911;	1WYP;	No	No	No
P52209	6-phosphogluconate dehydrogenase, decarboxylating (EC 1.1.1.44)	PGD PGDH	483	P52209;	2JKV;4GWG;4GWK;5UQ9;	No	No	No
P52292	Importin subunit alpha-1 (Karyopherin subunit alpha-2) (RAG cohort protein 1) (SRP1-alpha)	KPNA2 RCH1 SRP1	529	P52292;	1EFX;1QGK;1QGR;3FEX;3FEY;3WPT;4E4V;4WV6;5H43;7CRU;7N8J;7N9H;	No	No	No
P52333	Tyrosine-protein kinase JAK3 (EC 2.7.10.2) (Janus kinase 3) (JAK-3) (Leukocyte janus kinase) (L-JAK)	JAK3	1124	P52333;	1YVJ;3LXK;3LXL;3PJC;3ZC6;3ZEP;4HVD;4HVG;4HVH;4HVI;4I6Q;4QPS;4QT1;4RIO;4V0G;4Z16;5LWM;5LWN;5TOZ;5TTS;5TTU;5TTV;5VO6;5W86;5WFJ;6AAK;6DA4;6DB3;6DB4;6DUD;6GL9;6GLA;6GLB;6HZV;6NY4;7APF;7APG;7C3N;7Q6H;7UYV;	No	No	No
P52657	Transcription initiation factor IIA subunit 2 (General transcription factor IIA subunit 2) (TFIIA p12 subunit) (TFIIA-12) (TFIIAS) (Transcription initiation factor IIA gamma chain) (TFIIA-gamma)	GTF2A2 TF2A2	109	P52657;	1NVP;5FUR;5IY6;5IY7;5IY8;5IY9;5IYA;5IYB;5IYC;5IYD;5M4S;6MZM;6O9L;7EDX;7EG7;7EG8;7EG9;7EGA;7EGB;7EGC;7EGD;7EGI;7EGJ;7ENA;7ENC;7LBM;7NVR;7NVS;7NVT;7NVU;7NVY;7NVZ;7NW0;	No	No	No
P52732	Kinesin-like protein KIF11 (Kinesin-like protein 1) (Kinesin-like spindle protein HKSP) (Kinesin-related motor protein Eg5) (Thyroid receptor-interacting protein 5) (TR-interacting protein 5) (TRIP-5)	KIF11 EG5 KNSL1 TRIP5	1056	P52732;	1II6;1Q0B;1X88;1YRS;2FKY;2FL2;2FL6;2FME;2G1Q;2GM1;2IEH;2PG2;2Q2Y;2Q2Z;2UYI;2UYM;2WOG;2X2R;2X7C;2X7D;2X7E;2XAE;3CJO;3HQD;3K3B;3K5E;3KEN;3L9H;3WPN;3ZCW;4A1Z;4A28;4A50;4A51;4A5Y;4AP0;4AQV;4AQW;4AS7;4B7B;4BBG;4BXN;4CK5;4CK6;4CK7;4ZCA;4ZHI;5JV3;5ZO7;5ZO8;5ZO9;6G6Y;6G6Z;6HKX;6HKY;6TA3;6TA4;6TIW;6TLE;6TRL;6Y1I;	No	No	No
P52735	Guanine nucleotide exchange factor VAV2 (VAV-2)	VAV2	878	P52735;	2DLZ;2DM1;2LNW;2LNX;4ROJ;7RNV;	No	No	No
P52742	Zinc finger protein 135 (Zinc finger protein 61) (Zinc finger protein 78-like 1)	ZNF135 ZNF61 ZNF78L1	658	P52742;	n/a	No	No	No
P52757	Beta-chimaerin (Beta-chimerin) (Rho GTPase-activating protein 3)	CHN2 ARHGAP3 BCH	468	P52757;	1XA6;	No	No	No
P52823	Stanniocalcin-1 (STC-1)	STC1 STC	247	P52823;	n/a	No	No	No
P52945	Pancreas/duodenum homeobox protein 1 (PDX-1) (Glucose-sensitive factor) (GSF) (Insulin promoter factor 1) (IPF-1) (Insulin upstream factor 1) (IUF-1) (Islet/duodenum homeobox-1) (IDX-1) (Somatostatin-transactivating factor 1) (STF-1)	PDX1 IPF1 STF1	283	P52945;	6F8F;7KPK;	No	No	No
P52951	Homeobox protein GBX-2 (Gastrulation and brain-specific homeobox protein 2)	GBX2	348	P52951;	n/a	No	No	No
P52952	Homeobox protein Nkx-2.5 (Cardiac-specific homeobox) (Homeobox protein CSX) (Homeobox protein NK-2 homolog E)	NKX2-5 CSX NKX2.5 NKX2E	324	P52952;	3RKQ;4S0H;6WC2;6WC5;	No	No	No
P53367	Arfaptin-1 (ADP-ribosylation factor-interacting protein 1)	ARFIP1	373	P53367;	n/a	No	No	No
P53539	Protein FosB (FosB proto-oncogene, AP-1 transcription factor subunit) (G0/G1 switch regulatory protein 3) (Transcription factor AP-1 subunit FosB)	FOSB G0S3	338	P53539;	5VPA;5VPB;5VPC;5VPD;5VPE;5VPF;6UCI;6UCL;6UCM;	No	No	No
P53609	Geranylgeranyl transferase type-1 subunit beta (EC 2.5.1.59) (Geranylgeranyl transferase type I subunit beta) (GGTase-I-beta) (Type I protein geranyl-geranyltransferase subunit beta)	PGGT1B	377	P53609;	n/a	No	No	No
P53634	Dipeptidyl peptidase 1 (EC 3.4.14.1) (Cathepsin C) (Cathepsin J) (Dipeptidyl peptidase I) (DPP-I) (DPPI) (Dipeptidyl transferase) [Cleaved into: Dipeptidyl peptidase 1 exclusion domain chain (Dipeptidyl peptidase I exclusion domain chain); Dipeptidyl peptidase 1 heavy chain (Dipeptidyl peptidase I heavy chain); Dipeptidyl peptidase 1 light chain (Dipeptidyl peptidase I light chain)]	CTSC CPPI	463	P53634;	1K3B;2DJF;2DJG;3PDF;4CDC;4CDD;4CDE;4CDF;4OEL;4OEM;	No	No	No
P54132	RecQ-like DNA helicase BLM (EC 3.6.4.12) (Bloom syndrome protein) (DNA helicase, RecQ-like type 2) (RecQ2) (RecQ protein-like 3)	BLM RECQ2 RECQL3	1417	P54132;	2KV2;2MH9;2RRD;3WE2;3WE3;4CDG;4CGZ;4O3M;5LUP;5MK5;5U6K;7AUC;7AUD;	No	No	No
P54750	Dual specificity calcium/calmodulin-dependent 3',5'-cyclic nucleotide phosphodiesterase 1A (Cam-PDE 1A) (EC 3.1.4.17) (61 kDa Cam-PDE) (hCam-1)	PDE1A	535	P54750;	n/a	No	No	No
P54802	Alpha-N-acetylglucosaminidase (EC 3.2.1.50) (N-acetyl-alpha-glucosaminidase) (NAG) [Cleaved into: Alpha-N-acetylglucosaminidase 82 kDa form; Alpha-N-acetylglucosaminidase 77 kDa form]	NAGLU UFHSD1	743	P54802;	4XWH;	No	No	No
P54821	Paired mesoderm homeobox protein 1 (Homeobox protein PHOX1) (Paired-related homeobox protein 1) (PRX-1)	PRRX1 PMX1	245	P54821;	n/a	No	No	No
P54826	Growth arrest-specific protein 1 (GAS-1)	GAS1	345	P54826;	7RHQ;	No	No	No
P55008	Allograft inflammatory factor 1 (AIF-1) (Ionized calcium-binding adapter molecule 1) (Protein G1)	AIF1 G1 IBA1	147	P55008;	2D58;2G2B;	No	No	No
P55145	Mesencephalic astrocyte-derived neurotrophic factor (Arginine-rich protein) (Protein ARMET)	MANF ARMET ARP	182	P55145;	2KVD;2KVE;2W51;	No	No	No
P55268	Laminin subunit beta-2 (Laminin B1s chain) (Laminin-11 subunit beta) (Laminin-14 subunit beta) (Laminin-15 subunit beta) (Laminin-3 subunit beta) (Laminin-4 subunit beta) (Laminin-7 subunit beta) (Laminin-9 subunit beta) (S-laminin subunit beta) (S-LAM beta)	LAMB2 LAMS	1798	P55268;	n/a	No	No	No
P55273	Cyclin-dependent kinase 4 inhibitor D (p19-INK4d)	CDKN2D	166	P55273;	1BD8;1BI8;	No	No	No
P55317	Hepatocyte nuclear factor 3-alpha (HNF-3-alpha) (HNF-3A) (Forkhead box protein A1) (Transcription factor 3A) (TCF-3A)	FOXA1 HNF3A TCF3A	472	P55317;	7VOX;	No	No	No
P55318	Hepatocyte nuclear factor 3-gamma (HNF-3-gamma) (HNF-3G) (Fork head-related protein FKH H3) (Forkhead box protein A3) (Transcription factor 3G) (TCF-3G)	FOXA3 HNF3G TCF3G	350	P55318;	1VTN;	No	No	No
P55771	Paired box protein Pax-9	PAX9	341	P55771;	n/a	No	No	No
P55957	BH3-interacting domain death agonist (p22 BID) (BID) [Cleaved into: BH3-interacting domain death agonist p15 (p15 BID); BH3-interacting domain death agonist p13 (p13 BID); BH3-interacting domain death agonist p11 (p11 BID)]	BID	195	P55957;	1ZY3;2BID;2KBW;2M5B;2M5I;4BD2;4QVE;4ZEQ;4ZIG;4ZII;5AJJ;5C3F;7M5A;7M5B;7P33;	No	No	No
P56177	Homeobox protein DLX-1	DLX1	255	P56177;	n/a	No	No	No
P56178	Homeobox protein DLX-5	DLX5	289	P56178;	2DJN;4RDU;	No	No	No
P56179	Homeobox protein DLX-6	DLX6	175	P56179;	n/a	No	No	No
P56202	Cathepsin W (EC 3.4.22.-) (Lymphopain)	CTSW	376	P56202;	n/a	No	No	No
P56282	DNA polymerase epsilon subunit 2 (DNA polymerase II subunit 2) (DNA polymerase epsilon subunit B)	POLE2 DPE2	527	P56282;	2V6Z;5VBN;7PFO;7PLO;	No	No	No
P56693	Transcription factor SOX-10	SOX10	466	P56693;	n/a	No	No	No
P56706	Protein Wnt-7b	WNT7B	349	P56706;	n/a	No	No	No
P57059	Serine/threonine-protein kinase SIK1 (EC 2.7.11.1) (Salt-inducible kinase 1) (SIK-1) (Serine/threonine-protein kinase SNF1-like kinase 1) (Serine/threonine-protein kinase SNF1LK)	SIK1 SIK SNF1LK	783	P57059;	n/a	No	No	No
P57078	Receptor-interacting serine/threonine-protein kinase 4 (EC 2.7.11.1) (Ankyrin repeat domain-containing protein 3) (PKC-delta-interacting protein kinase)	RIPK4 ANKRD3 DIK	832	P57078;	n/a	No	No	No
P58005	Sestrin-3 (EC 1.11.1.-)	SESN3 SEST3	492	P58005;	n/a	No	No	No
P58546	Myotrophin (Protein V-1)	MTPN	118	P58546;	3AAA;7DF7;7DSA;7DSB;	No	No	No
P58876	Histone H2B type 1-D (H2B-clustered histone 5) (HIRA-interacting protein 2) (Histone H2B.1 B) (Histone H2B.b) (H2B/b)	H2BC5 H2BFB HIRIP2 HIST1H2BD	126	P58876;	n/a	No	No	No
P59046	NACHT, LRR and PYD domains-containing protein 12 (Monarch-1) (PYRIN-containing APAF1-like protein 7) (Regulated by nitric oxide)	NLRP12 NALP12 PYPAF7 RNO	1061	P59046;	2L6A;4XHS;5H7N;	No	No	No
P59910	DnaJ homolog subfamily B member 13 (Testis and spermatogenesis cell-related protein 6) (Testis spermatocyte apoptosis-related gene 6 protein) (Testis spermatogenesis apoptosis-related gene 3 protein) (Testis spermatogenesis apoptosis-related gene 6 protein)	DNAJB13 TSARG3 TSARG6	316	P59910;	n/a	No	No	No
P60008	Putative spermatid-specific linker histone H1-like protein (H1.9 linker histone pseudogene)	H1-9P H1-9 HILS1	231	P60008;	n/a	No	No	No
P60660	Myosin light polypeptide 6 (17 kDa myosin light chain) (LC17) (Myosin light chain 3) (MLC-3) (Myosin light chain alkali 3) (Myosin light chain A3) (Smooth muscle and nonmuscle myosin light chain alkali 6)	MYL6	151	P60660;	n/a	No	No	No
P60903	Protein S100-A10 (Calpactin I light chain) (Calpactin-1 light chain) (Cellular ligand of annexin II) (S100 calcium-binding protein A10) (p10 protein) (p11)	S100A10 ANX2LG CAL1L CLP11	97	P60903;	1A4P;1BT6;4DRW;4FTG;4HRE;4HRG;4HRH;	No	No	No
P61421	V-type proton ATPase subunit d 1 (V-ATPase subunit d 1) (32 kDa accessory protein) (V-ATPase 40 kDa accessory protein) (V-ATPase AC39 subunit) (p39) (Vacuolar proton pump subunit d 1)	ATP6V0D1 ATP6D VPATPD	351	P61421;	6WLW;6WM2;6WM3;6WM4;7U4T;7UNF;	No	No	No
P61764	Syntaxin-binding protein 1 (MUNC18-1) (N-Sec1) (Protein unc-18 homolog 1) (Unc18-1) (Protein unc-18 homolog A) (Unc-18A) (p67)	STXBP1 UNC18A	594	P61764;	6L03;	No	No	No
P61981	14-3-3 protein gamma (Protein kinase C inhibitor protein 1) (KCIP-1) [Cleaved into: 14-3-3 protein gamma, N-terminally processed]	YWHAG	247	P61981;	2B05;3UZD;4E2E;4J6S;4O46;5D3E;6A5S;6BYJ;6BYL;6BZD;6FEL;6GKF;6GKG;6S9K;6SAD;6Y4K;6Y6B;6ZBT;6ZC9;7A6R;7A6Y;	No	No	No
P62269	40S ribosomal protein S18 (Ke-3) (Ke3) (Small ribosomal subunit protein uS13)	RPS18 D6S218E	152	P62269;	4UG0;4V6X;5A2Q;5AJ0;5FLX;5LKS;5OA3;5T2C;5VYC;6FEC;6G18;6G4S;6G4W;6G51;6G53;6G5H;6G5I;6IP5;6IP6;6IP8;6OLE;6OLF;6OLG;6OLI;6OLZ;6OM0;6OM7;6QZP;6XA1;6Y0G;6Y2L;6Y57;6YBS;6Z6L;6Z6M;6Z6N;6ZLW;6ZM7;6ZME;6ZMI;6ZMO;6ZMT;6ZMW;6ZN5;6ZOJ;6ZOL;6ZON;6ZP4;6ZUO;6ZV6;6ZVH;6ZVJ;6ZXD;6ZXE;6ZXF;6ZXG;6ZXH;7A09;7K5I;7QP6;7QP7;	No	No	No
P62760	Visinin-like protein 1 (VILIP) (VLP-1) (Hippocalcin-like protein 3) (HLP3)	VSNL1 VISL1	191	P62760;	n/a	No	No	No
P62805	Histone H4	H4C1 H4/A H4FA HIST1H4A; H4C2 H4/I H4FI HIST1H4B; H4C3 H4/G H4FG HIST1H4C; H4C4 H4/B H4FB HIST1H4D; H4C5 H4/J H4FJ HIST1H4E; H4C6 H4/C H4FC HIST1H4F; H4C8 H4/H H4FH HIST1H4H; H4C9 H4/M H4FM HIST1H4I; H4C11 H4/E H4FE HIST1H4J; H4C12 H4/D H4FD HIST1H4K; H4C13 H4/K H4FK HIST1H4L; H4C14 H4/N H4F2 H4FN HIST2H4 HIST2H4A; H4C15 H4/O H4FO HIST2H4B; H4C16 H4-16 HIST4H4	103	P62805;	1ZKK;2BQZ;2CV5;2IG0;2KWN;2KWO;2LVM;2QQS;2RJE;2RNY;2RS9;3A6N;3AFA;3AN2;3AV1;3AV2;3AYW;3AZE;3AZF;3AZG;3AZH;3AZI;3AZJ;3AZK;3AZL;3AZM;3AZN;3CFS;3CFV;3F9W;3F9X;3F9Y;3F9Z;3IJ1;3JPX;3NQJ;3NQU;3O36;3QBY;3QZS;3QZT;3QZV;3R45;3UVW;3UVX;3UVY;3UW9;3W96;3W97;3W98;3W99;3WA9;3WAA;3WKJ;3WTP;3X1S;3X1T;3X1U;3X1V;4GQB;4H9N;4H9O;4H9P;4H9Q;4H9R;4H9S;4HGA;4M38;4N3W;4N4F;4QUT;4QUU;4QYD;4U9W;4YM5;4YM6;4YY6;4YYD;4YYG;4YYH…	No	No	No
P62807	Histone H2B type 1-C/E/F/G/I (Histone H2B.1 A) (Histone H2B.a) (H2B/a) (Histone H2B.g) (H2B/g) (Histone H2B.h) (H2B/h) (Histone H2B.k) (H2B/k) (Histone H2B.l) (H2B/l)	H2BC4 H2BFL HIST1H2BC; H2BC6 H2BFH HIST1H2BE; H2BC7 H2BFG HIST1H2BF; H2BC8 H2BFA HIST1H2BG; H2BC10 H2BFK HIST1H2BI	126	P62807;	5GT0;5KGF;6ACO;6C0W;6FML;6R0C;6RNY;6SE0;6SE6;6SEE;6SEF;6SEG;6UPK;6UPL;6X59;6X5A;6XJD;7A08;7JO9;7JOA;7PII;7R5R;7TAN;7TRF;7U46;7U47;7U4D;7U50;7U51;7U52;7U53;7YWX;7YYH;	No	No	No
P63010	AP-2 complex subunit beta (AP105B) (Adaptor protein complex AP-2 subunit beta) (Adaptor-related protein complex 2 subunit beta) (Beta-2-adaptin) (Beta-adaptin) (Clathrin assembly protein complex 2 beta large chain) (Plasma membrane adaptor HA2/AP2 adaptin beta subunit)	AP2B1 ADTB2 CLAPB1	937	P63010;	1E42;2G30;2IV8;2IV9;2JKR;2JKT;2VGL;2XA7;4UQI;5M5R;6QH5;6QH6;6QH7;6URI;6YAE;6YAF;6YAH;6YAI;7OG1;7OHO;7OM8;7Z5C;	No	No	No
P63104	14-3-3 protein zeta/delta (Protein kinase C inhibitor protein 1) (KCIP-1)	YWHAZ	245	P63104;	1IB1;1QJA;1QJB;2C1J;2C1N;2O02;2WH0;3CU8;3NKX;3RDH;4BG6;4FJ3;4HKC;4IHL;4N7G;4N7Y;4N84;4WRQ;4ZDR;5D2D;5D3F;5EWZ;5EXA;5J31;5JM4;5M35;5M36;5M37;5NAS;5ULO;5WXN;5XY9;6EF5;6EJL;6EWW;6F08;6F09;6FN9;6FNA;6FNB;6FNC;6Q0K;6RLZ;6U2H;6XAG;6YMO;6YO8;6YOS;6ZFD;6ZFG;7D8H;7D8P;7D9V;7MFD;7MFE;7MFF;7Q16;	No	No	No
P63316	Troponin C, slow skeletal and cardiac muscles (TN-C)	TNNC1 TNNC	161	P63316;	1AP4;1IH0;1J1D;1J1E;1LXF;1MXL;1OZS;1SPY;1WRK;1WRL;2JT0;2JT3;2JT8;2JTZ;2JXL;2KDH;2KFX;2KGB;2KRD;2L1R;2L98;2MKP;2MLE;2MLF;2MZP;2N79;2N7L;3RV5;3SD6;3SWB;4GJE;4GJF;4GJG;4Y99;5VLN;5W88;5WCL;6KN7;6KN8;6MV3;7JGI;7SC2;7SC3;7SUP;7SVC;7SWG;7SWI;7SXC;7SXD;7UH9;7UHA;	No	No	No
P67936	Tropomyosin alpha-4 chain (TM30p1) (Tropomyosin-4)	TPM4	248	P67936;	n/a	No	No	No
P68431	Histone H3.1 (Histone H3/a) (Histone H3/b) (Histone H3/c) (Histone H3/d) (Histone H3/f) (Histone H3/h) (Histone H3/i) (Histone H3/j) (Histone H3/k) (Histone H3/l)	H3C1 H3FA HIST1H3A; H3C2 H3FL HIST1H3B; H3C3 H3FC HIST1H3C; H3C4 H3FB HIST1H3D; H3C6 H3FD HIST1H3E; H3C7 H3FI HIST1H3F; H3C8 H3FH HIST1H3G; H3C10 H3FK HIST1H3H; H3C11 H3FF HIST1H3I; H3C12 H3FJ HIST1H3J	136	P68431;	1CS9;1CT6;1O9S;1Q3L;2B2T;2B2U;2B2V;2B2W;2C1J;2C1N;2CO0;2CV5;2FSA;2KWJ;2KWK;2L75;2LBM;2LGG;2M0O;2NDF;2NDG;2OQ6;2OT7;2OX0;2RI7;2RR4;2UXN;2V85;2V89;2VNF;2VPG;2X0L;3A1B;3AFA;3AVR;3AYW;3AZE;3AZF;3AZG;3AZH;3AZI;3AZJ;3AZK;3AZL;3AZM;3AZN;3B95;3FDT;3KMT;3KQI;3LQI;3LQJ;3MP1;3O34;3O35;3O37;3QJ6;3RIG;3RIY;3SOU;3SOW;3U31;3U3D;3U4S;3U5N;3U5O;3U5P;3UEE;3UEF;3UIG;3UII;3UIK;3V43;3W96;3W97;3W98;3W99;3WA9;3WAA;3WKJ…	No	No	No
P68871	Hemoglobin subunit beta (Beta-globin) (Hemoglobin beta chain) [Cleaved into: LVV-hemorphin-7; Spinorphin]	HBB	147	P68871;	1A00;1A01;1A0U;1A0Z;1A3N;1A3O;1ABW;1ABY;1AJ9;1B86;1BAB;1BBB;1BIJ;1BUW;1BZ0;1BZ1;1BZZ;1C7B;1C7C;1C7D;1CBL;1CBM;1CH4;1CLS;1CMY;1COH;1DKE;1DXT;1DXU;1DXV;1FN3;1G9V;1GBU;1GBV;1GLI;1GZX;1HAB;1HAC;1HBA;1HBB;1HBS;1HCO;1HDB;1HGA;1HGB;1HGC;1HHO;1IRD;1J3Y;1J3Z;1J40;1J41;1J7S;1J7W;1J7Y;1JY7;1K0Y;1K1K;1KD2;1LFL;1LFQ;1LFT;1LFV;1LFY;1LFZ;1LJW;1M9P;1MKO;1NEJ;1NIH;1NQP;1O1I;1O1J;1O1K;1O1L;1O1M;1O1N;1O1O;1O1P;1QI8…	No	No	No
P78337	Pituitary homeobox 1 (Hindlimb-expressed homeobox protein backfoot) (Homeobox protein PITX1) (Paired-like homeodomain transcription factor 1)	PITX1 BFT PTX1	314	P78337;	n/a	No	No	No
P78396	Cyclin-A1	CCNA1	465	P78396;	n/a	No	No	No
P78413	Iroquois-class homeodomain protein IRX-4 (Homeodomain protein IRXA3) (Iroquois homeobox protein 4)	IRX4 IRXA3	519	P78413;	n/a	No	No	No
P78415	Iroquois-class homeodomain protein IRX-3 (Homeodomain protein IRXB1) (Iroquois homeobox protein 3)	IRX3 IRXB1	501	P78415;	n/a	No	No	No
P78417	Glutathione S-transferase omega-1 (GSTO-1) (EC 2.5.1.18) (Glutathione S-transferase omega 1-1) (GSTO 1-1) (Glutathione-dependent dehydroascorbate reductase) (EC 1.8.5.1) (Monomethylarsonic acid reductase) (MMA(V) reductase) (EC 1.20.4.2) (S-(Phenacyl)glutathione reductase) (SPG-R)	GSTO1 GSTTLP28	241	P78417;	1EEM;3LFL;3VLN;4IS0;4YQM;4YQU;4YQV;5UEH;5V3Q;5YVN;5YVO;6MHB;6MHC;6MHD;6PNM;6PNN;6PNO;	No	No	No
P78545	ETS-related transcription factor Elf-3 (E74-like factor 3) (Epithelial-restricted with serine box) (Epithelium-restricted Ets protein ESX) (Epithelium-specific Ets transcription factor 1) (ESE-1)	ELF3 ERT ESX JEN	371	P78545;	2E8P;	No	No	No
P80511	Protein S100-A12 (CGRP) (Calcium-binding protein in amniotic fluid 1) (CAAF1) (Calgranulin-C) (CAGC) (Extracellular newly identified RAGE-binding protein) (EN-RAGE) (Migration inhibitory factor-related protein 6) (MRP-6) (p6) (Neutrophil S100 protein) (S100 calcium-binding protein A12) [Cleaved into: Calcitermin]	S100A12	92	P80511;	1E8A;1GQM;1ODB;2M9G;2WC8;2WCB;2WCE;2WCF;	No	No	No
P82979	SAP domain-containing ribonucleoprotein (Cytokine-induced protein of 29 kDa) (Nuclear protein Hcc-1) (Proliferation-associated cytokine-inducible protein CIP29)	SARNP HCC1 HSPC316	210	P82979;	2DO1;	No	No	No
P84098	60S ribosomal protein L19 (Large ribosomal subunit protein eL19)	RPL19	196	P84098;	4UG0;4V6X;5A2Q;5AJ0;5LKS;5T2C;6IP5;6IP6;6IP8;6LQM;6LSR;6LSS;6LU8;6OLE;6OLF;6OLG;6OLI;6OLZ;6OM0;6OM7;6QZP;6SXO;6W6L;6XA1;6Y0G;6Y2L;6Y57;6Y6X;6Z6L;6Z6M;6Z6N;6ZM7;6ZME;6ZMI;6ZMO;7BHP;7F5S;	No	No	No
P84243	Histone H3.3	H3-3A H3.3A H3F3 H3F3A PP781; H3-3B H3.3B H3F3B	136	P84243;	2L43;3ASK;3ASL;3AV2;3JVK;3MUK;3MUL;3QL9;3QLA;3QLC;3WTP;4GNE;4GNF;4GNG;4GU0;4GUR;4GUS;4GY5;4H9N;4H9O;4H9P;4H9Q;4H9R;4H9S;4HGA;4L58;4N4I;4O62;4QQ4;4TMP;4U7T;4W5A;5B32;5B33;5BNV;5BNX;5DWQ;5DX0;5JA4;5JJY;5JLB;5KDM;5X7X;6A5L;6A5O;6A5P;6A5R;6A5T;6A5U;6HGT;6INQ;6IR9;6J4W;6J4X;6J4Y;6J4Z;6J50;6J51;6J9J;6PZV;6QXZ;6R0C;6RNY;6U04;7A08;7CIZ;7CJ0;7CWH;7OKP;7V1L;7V1M;7VCQ;7W5M;7XSE;7XSX;7XSZ;7XTD;	No	No	No
P85298	Rho GTPase-activating protein 8 (Rho-type GTPase-activating protein 8)	ARHGAP8	464	P85298;	n/a	No	No	No
P86452	Zinc finger BED domain-containing protein 6	ZBED6	979	P86452;	n/a	No	No	No
P98174	FYVE, RhoGEF and PH domain-containing protein 1 (Faciogenital dysplasia 1 protein) (Rho/Rac guanine nucleotide exchange factor FGD1) (Rho/Rac GEF) (Zinc finger FYVE domain-containing protein 3)	FGD1 FGDY ZFYVE3	961	P98174;	n/a	No	No	No
P99999	Cytochrome c	CYCS CYC	105	P99999;	1J3S;2N3Y;2N9I;2N9J;3NWV;3ZCF;3ZOO;5EXQ;5O10;5TY3;6DUJ;6ECJ;6XNK;	No	No	No
Q00056	Homeobox protein Hox-A4 (Homeobox protein Hox-1.4) (Homeobox protein Hox-1D)	HOXA4 HOX1D	320	Q00056;	n/a	No	No	No
Q00653	Nuclear factor NF-kappa-B p100 subunit (DNA-binding factor KBF2) (H2TF1) (Lymphocyte translocation chromosome 10 protein) (Nuclear factor of kappa light polypeptide gene enhancer in B-cells 2) (Oncogene Lyt-10) (Lyt10) [Cleaved into: Nuclear factor NF-kappa-B p52 subunit]	NFKB2 LYT10	900	Q00653;	1A3Q;2D96;3DO7;4OT9;5ZMC;7CLI;7VUP;7VUQ;7W7L;	No	No	No
Q00722	1-phosphatidylinositol 4,5-bisphosphate phosphodiesterase beta-2 (EC 3.1.4.11) (Phosphoinositide phospholipase C-beta-2) (Phospholipase C-beta-2) (PLC-beta-2)	PLCB2	1185	Q00722;	2FJU;2ZKM;	No	No	No
Q00978	Interferon regulatory factor 9 (IRF-9) (IFN-alpha-responsive transcription factor subunit) (ISGF3 p48 subunit) (Interferon-stimulated gene factor 3 gamma) (ISGF-3 gamma) (Transcriptional regulator ISGF3 subunit gamma)	IRF9 ISGF3G	393	Q00978;	n/a	No	No	No
Q01064	Dual specificity calcium/calmodulin-dependent 3',5'-cyclic nucleotide phosphodiesterase 1B (Cam-PDE 1B) (EC 3.1.4.17) (63 kDa Cam-PDE)	PDE1B PDES1B	536	Q01064;	1TAZ;4NPV;4NPW;5B25;5UOY;5UP0;5W6E;	No	No	No
Q01094	Transcription factor E2F1 (E2F-1) (PBR3) (Retinoblastoma-associated protein 1) (RBAP-1) (Retinoblastoma-binding protein 3) (RBBP-3) (pRB-binding protein E2F-1)	E2F1 RBBP3	437	Q01094;	1H24;1O9K;2AZE;5M9N;5M9O;6G0P;6ULS;	No	No	No
Q01518	Adenylyl cyclase-associated protein 1 (CAP 1)	CAP1 CAP	475	Q01518;	1K8F;	No	No	No
Q01543	Friend leukemia integration 1 transcription factor (Proto-oncogene Fli-1) (Transcription factor ERGB)	FLI1	452	Q01543;	1FLI;1X66;2YTU;5E8G;5E8I;5JVT;6VG2;6VG8;6VGD;	No	No	No
Q01664	Transcription factor AP-4 (Activating enhancer-binding protein 4) (Class C basic helix-loop-helix protein 41) (bHLHc41)	TFAP4 BHLHC41	338	Q01664;	n/a	No	No	No
Q01826	DNA-binding protein SATB1 (Special AT-rich sequence-binding protein 1)	SATB1	763	Q01826;	1YSE;2L1P;2MW8;2O49;2O4A;3NZL;3TUO;6LFF;	No	No	No
Q01860	POU domain, class 5, transcription factor 1 (Octamer-binding protein 3) (Oct-3) (Octamer-binding protein 4) (Oct-4) (Octamer-binding transcription factor 3) (OTF-3)	POU5F1 OCT3 OCT4 OTF3	360	Q01860;	6T90;6YOV;	No	No	No
Q01954	Zinc finger protein basonuclin-1	BNC1 BNC	994	Q01954;	n/a	No	No	No
Q01970	1-phosphatidylinositol 4,5-bisphosphate phosphodiesterase beta-3 (EC 3.1.4.11) (Phosphoinositide phospholipase C-beta-3) (Phospholipase C-beta-3) (PLC-beta-3)	PLCB3	1234	Q01970;	4GNK;4QJ3;4QJ4;4QJ5;7SQ2;	No	No	No
Q01995	Transgelin (22 kDa actin-binding protein) (Protein WS3-10) (Smooth muscle protein 22-alpha) (SM22-alpha)	TAGLN SM22 WS3-10	201	Q01995;	n/a	No	No	No
Q02318	Sterol 26-hydroxylase, mitochondrial (EC 1.14.15.15) (5-beta-cholestane-3-alpha,7-alpha,12-alpha-triol 26-hydroxylase) (Cytochrome P-450C27/25) (Cytochrome P450 27) (Sterol 27-hydroxylase) (Vitamin D(3) 25-hydroxylase)	CYP27A1 CYP27	531	Q02318;	n/a	No	No	No
Q02363	DNA-binding protein inhibitor ID-2 (Class B basic helix-loop-helix protein 26) (bHLHb26) (Inhibitor of DNA binding 2) (Inhibitor of differentiation 2)	ID2 BHLHB26	134	Q02363;	4AYA;	No	No	No
Q02535	DNA-binding protein inhibitor ID-3 (Class B basic helix-loop-helix protein 25) (bHLHb25) (Helix-loop-helix protein HEIR-1) (ID-like protein inhibitor HLH 1R21) (Inhibitor of DNA binding 3) (Inhibitor of differentiation 3)	ID3 1R21 BHLHB25 HEIR1	119	Q02535;	2LFH;	No	No	No
Q02556	Interferon regulatory factor 8 (IRF-8) (Interferon consensus sequence-binding protein) (H-ICSBP) (ICSBP)	IRF8 ICSBP1	426	Q02556;	n/a	No	No	No
Q02818	Nucleobindin-1 (CALNUC)	NUCB1 NUC	461	Q02818;	1SNL;	No	No	No
Q02930	Cyclic AMP-responsive element-binding protein 5 (CREB-5) (cAMP-responsive element-binding protein 5) (cAMP-response element-binding protein A) (CRE-BPa)	CREB5 CREBPA	508	Q02930;	n/a	No	No	No
Q03169	Tumor necrosis factor alpha-induced protein 2 (TNF alpha-induced protein 2) (Primary response gene B94 protein)	TNFAIP2	654	Q03169;	n/a	No	No	No
Q03252	Lamin-B2	LMNB2 LMN2	620	Q03252;	2LLL;5BNW;	No	No	No
Q03923	Zinc finger protein 85 (Zinc finger protein HPF4) (Zinc finger protein HTF1)	ZNF85	595	Q03923;	n/a	No	No	No
Q03938	Zinc finger protein 90 (Zinc finger protein HTF9)	ZNF90	601	Q03938;	n/a	No	No	No
Q04695	Keratin, type I cytoskeletal 17 (39.1) (Cytokeratin-17) (CK-17) (Keratin-17) (K17)	KRT17	432	Q04695;	n/a	No	No	No
Q04743	Homeobox protein EMX2 (Empty spiracles homolog 2) (Empty spiracles-like protein 2)	EMX2	252	Q04743;	n/a	No	No	No
Q04917	14-3-3 protein eta (Protein AS1)	YWHAH YWHA1	246	Q04917;	2C63;2C74;7NMZ;	No	No	No
Q05084	Islet cell autoantigen 1 (69 kDa islet cell autoantigen) (ICA69) (Islet cell autoantigen p69) (ICAp69) (p69)	ICA1	483	Q05084;	n/a	No	No	No
Q05193	Dynamin-1 (EC 3.6.5.5)	DNM1 DNM	864	Q05193;	1DYN;2DYN;2X2E;2X2F;3SNH;3ZYC;3ZYS;4UUD;4UUK;5D3Q;6DLU;6DLV;6S9A;7AX3;	No	No	No
Q05195	Max dimerization protein 1 (Max dimerizer 1) (Protein MAD)	MXD1 MAD	221	Q05195;	1E91;1G1E;1NLW;1PD7;1S5Q;	No	No	No
Q05481	Zinc finger protein 91 (Zinc finger protein HPF7) (Zinc finger protein HTF10)	ZNF91	1191	Q05481;	n/a	No	No	No
Q05925	Homeobox protein engrailed-1 (Homeobox protein en-1) (Hu-En-1)	EN1	392	Q05925;	n/a	No	No	No
Q06323	Proteasome activator complex subunit 1 (11S regulator complex subunit alpha) (REG-alpha) (Activator of multicatalytic protease subunit 1) (Interferon gamma up-regulated I-5111 protein) (IGUP I-5111) (Proteasome activator 28 subunit alpha) (PA28a) (PA28alpha)	PSME1 IFI5111	249	Q06323;	1AVO;7DR6;7DRW;	No	No	No
Q06609	DNA repair protein RAD51 homolog 1 (HsRAD51) (hRAD51) (RAD51 homolog A)	RAD51 RAD51A RECA	339	Q06609;	1B22;1N0W;5H1B;5H1C;5JZC;5NP7;5NWL;7C9A;7EJC;7EJE;	No	No	No
Q06710	Paired box protein Pax-8	PAX8	450	Q06710;	2K27;	No	No	No
Q06945	Transcription factor SOX-4	SOX4	474	Q06945;	n/a	No	No	No
Q07343	cAMP-specific 3',5'-cyclic phosphodiesterase 4B (EC 3.1.4.53) (DPDE4) (PDE32)	PDE4B DPDE4	736	Q07343;	1F0J;1RO6;1RO9;1ROR;1TB5;1XLX;1XLZ;1XM4;1XM6;1XMU;1XMY;1XN0;1XOS;1XOT;1Y2H;1Y2J;2CHM;2QYL;3D3P;3FRG;3G45;3GWT;3HC8;3HDZ;3HMV;3KKT;3LY2;3O0J;3O56;3O57;3W5E;3WD9;4KP6;4MYQ;4NW7;4WZI;4X0F;5K6J;5LAQ;5OHJ;6BOJ;	No	No	No
Q07617	Sperm-associated antigen 1 (HSD-3.8) (Infertility-related sperm protein Spag-1)	SPAG1	926	Q07617;	6I57;7BEV;	No	No	No
Q07890	Son of sevenless homolog 2 (SOS-2)	SOS2	1332	Q07890;	6EIE;	No	No	No
Q07960	Rho GTPase-activating protein 1 (CDC42 GTPase-activating protein) (GTPase-activating protein rhoGAP) (Rho-related small GTPase protein activator) (Rho-type GTPase-activating protein 1) (p50-RhoGAP)	ARHGAP1 CDC42GAP RHOGAP1	439	Q07960;	1AM4;1GRN;1OW3;1RGP;1TX4;2NGR;5M6X;5M70;6R3V;	No	No	No
Q07973	1,25-dihydroxyvitamin D(3) 24-hydroxylase, mitochondrial (24-OHase) (Vitamin D(3) 24-hydroxylase) (EC 1.14.15.16) (Cytochrome P450 24A1) (Cytochrome P450-CC24)	CYP24A1 CYP24	514	Q07973;	n/a	No	No	No
Q08050	Forkhead box protein M1 (Forkhead-related protein FKHL16) (Hepatocyte nuclear factor 3 forkhead homolog 11) (HFH-11) (HNF-3/fork-head homolog 11) (M-phase phosphoprotein 2) (MPM-2 reactive phosphoprotein 2) (Transcription factor Trident) (Winged-helix factor from INS-1 cells)	FOXM1 FKHL16 HFH11 MPP2 WIN	763	Q08050;	3G73;7FJ2;	No	No	No
Q08380	Galectin-3-binding protein (Basement membrane autoantigen p105) (Lectin galactoside-binding soluble 3-binding protein) (Mac-2-binding protein) (MAC2BP) (Mac-2 BP) (Tumor-associated antigen 90K)	LGALS3BP M2BP	585	Q08380;	1BY2;6GFB;	No	No	No
Q08493	cAMP-specific 3',5'-cyclic phosphodiesterase 4C (EC 3.1.4.53) (DPDE1) (PDE21)	PDE4C DPDE1	712	Q08493;	2QYM;	No	No	No
Q08495	Dematin (Dematin actin-binding protein) (Erythrocyte membrane protein band 4.9)	DMTN DMT EPB49	405	Q08495;	1QZP;1ZV6;	No	No	No
Q08499	cAMP-specific 3',5'-cyclic phosphodiesterase 4D (EC 3.1.4.53) (DPDE3) (PDE43)	PDE4D DPDE3	809	Q08499;	1E9K;1MKD;1OYN;1PTW;1Q9M;1TB7;1TBB;1XOM;1XON;1XOQ;1XOR;1Y2B;1Y2C;1Y2D;1Y2E;1Y2K;1ZKN;2FM0;2FM5;2PW3;2QYN;3G4G;3G4I;3G4K;3G4L;3G58;3IAD;3IAK;3K4S;3SL3;3SL4;3SL5;3SL6;3SL8;3V9B;4OGB;4W1O;4WCU;5K1I;5K32;5LBO;5TKB;5WH5;5WH6;5WQA;6AKR;6BOJ;6F6U;6F8R;6F8T;6F8U;6F8V;6F8W;6F8X;6FDC;6FDI;6FE7;6FEB;6FET;6FT0;6FTA;6FTW;6FW3;6HWO;6IAG;6IBF;6IM6;6IMB;6IMD;6IMI;6IMO;6IMR;6IMT;6IND;6INK;6INM;6KJZ;6KK0;6LRM;6NJH…	No	No	No
Q08629	Testican-1 (Protein SPOCK)	SPOCK1 SPOCK TIC1 TICN1	439	Q08629;	n/a	No	No	No
Q08AI8	Protein mab-21-like 4	MAB21L4 C2orf54	447	Q08AI8;	n/a	No	No	No
Q0D2I5	Non-homologous end joining factor IFFO1 (NHEJ factor IFFO1) (Intermediate filament family orphan 1) (Tumor antigen HOM-TES-103)	IFFO1 IFFO	559	Q0D2I5;	6ABO;	No	No	No
Q0D2J5	Zinc finger protein 763	ZNF763	394	Q0D2J5;	n/a	No	No	No
Q0VAM2	Ras-GEF domain-containing family member 1B (GPI gamma-4)	RASGEF1B GPIG4	473	Q0VAM2;	n/a	No	No	No
Q12778	Forkhead box protein O1 (Forkhead box protein O1A) (Forkhead in rhabdomyosarcoma)	FOXO1 FKHR FOXO1A	655	Q12778;	3CO6;3CO7;3COA;4LG0;5DUI;6LBI;6QVW;6QZR;6QZS;	No	No	No
Q12841	Follistatin-related protein 1 (Follistatin-like protein 1)	FSTL1 FRP	308	Q12841;	n/a	No	No	No
Q12882	Dihydropyrimidine dehydrogenase [NADP(+)] (DHPDHase) (DPD) (EC 1.3.1.2) (Dihydrothymine dehydrogenase) (Dihydrouracil dehydrogenase)	DPYD	1025	Q12882;	n/a	No	No	No
Q12905	Interleukin enhancer-binding factor 2 (Nuclear factor of activated T-cells 45 kDa)	ILF2 NF45 PRO3063	390	Q12905;	n/a	No	No	No
Q12929	Epidermal growth factor receptor kinase substrate 8	EPS8	822	Q12929;	2E8M;7TZK;	No	No	No
Q12952	Forkhead box protein L1 (Forkhead-related protein FKHL11) (Forkhead-related transcription factor 7) (FREAC-7)	FOXL1 FKHL11 FREAC7	345	Q12952;	n/a	No	No	No
Q12979	Active breakpoint cluster region-related protein	ABR	859	Q12979;	n/a	No	No	No
Q13007	Interleukin-24 (IL-24) (Melanoma differentiation-associated gene 7 protein) (MDA-7) (Suppression of tumorigenicity 16 protein)	IL24 MDA7 ST16	206	Q13007;	6DF3;6GG1;	No	No	No
Q13075	Baculoviral IAP repeat-containing protein 1 (Neuronal apoptosis inhibitory protein)	NAIP BIRC1	1403	Q13075;	2VM5;	No	No	No
Q13094	Lymphocyte cytosolic protein 2 (SH2 domain-containing leukocyte protein of 76 kDa) (SLP-76 tyrosine phosphoprotein) (SLP76)	LCP2	533	Q13094;	1H3H;1YWO;2EAP;2ROR;6ZCJ;	No	No	No
Q13106	Zinc finger protein 154	ZNF154 KIAA2003	437	Q13106;	n/a	No	No	No
Q13155	Aminoacyl tRNA synthase complex-interacting multifunctional protein 2 (Multisynthase complex auxiliary component p38) (Protein JTV-1)	AIMP2 JTV1 PRO0992	320	Q13155;	4DPG;4YCU;4YCW;5A1N;5A34;5A5H;5Y6L;6ILD;6IY6;6JPV;6K39;	No	No	No
Q13177	Serine/threonine-protein kinase PAK 2 (EC 2.7.11.1) (Gamma-PAK) (PAK65) (S6/H4 kinase) (p21-activated kinase 2) (PAK-2) (p58) [Cleaved into: PAK-2p27 (p27); PAK-2p34 (p34) (C-t-PAK2)]	PAK2	524	Q13177;	3PCS;	No	No	No
Q13201	Multimerin-1 (EMILIN-4) (Elastin microfibril interface located protein 4) (Elastin microfibril interfacer 4) (Endothelial cell multimerin) [Cleaved into: Platelet glycoprotein Ia*; 155 kDa platelet multimerin (p-155) (p155)]	MMRN1 ECM EMILIN4 GPIA* MMRN	1228	Q13201;	n/a	No	No	No
Q13233	Mitogen-activated protein kinase kinase kinase 1 (EC 2.7.11.25) (MAPK/ERK kinase kinase 1) (MEK kinase 1) (MEKK 1)	MAP3K1 MAPKKK1 MEKK MEKK1	1512	Q13233;	6WHB;	No	No	No
Q13309	S-phase kinase-associated protein 2 (Cyclin-A/CDK2-associated protein p45) (F-box protein Skp2) (F-box/LRR-repeat protein 1) (p45skp2)	SKP2 FBXL1	424	Q13309;	1FQV;1FS1;1FS2;1LDK;2ASS;2AST;7B5L;7B5M;7B5R;7LUO;	No	No	No
Q13342	Nuclear body protein SP140 (Lymphoid-restricted homolog of Sp100) (LYSp100) (Nuclear autoantigen Sp-140) (Speckled 140 kDa)	SP140 LYSP100	867	Q13342;	2MD7;2MD8;6G8R;	No	No	No
Q13368	MAGUK p55 subfamily member 3 (Discs large homolog 3) (Protein MPP3)	MPP3 DLG3	585	Q13368;	n/a	No	No	No
Q13415	Origin recognition complex subunit 1 (Replication control protein 1)	ORC1 ORC1L PARC1	861	Q13415;	5UJ7;5UJM;6P3W;7CTF;7CTG;7JPO;7JPP;7JPR;7JPS;	No	No	No
Q13426	DNA repair protein XRCC4 (hXRCC4) (X-ray repair cross-complementing protein 4) [Cleaved into: Protein XRCC4, C-terminus (XRCC4/C)]	XRCC4	336	Q13426;	1FU1;1IK9;3II6;3MUD;3Q4F;3RWR;3SR2;3W03;4XA4;5CHX;5CJ0;5CJ4;5E50;5WJ7;5WLZ;6ABO;7LSY;7LT3;7M3P;7NFC;7NFE;	No	No	No
Q13451	Peptidyl-prolyl cis-trans isomerase FKBP5 (PPIase FKBP5) (EC 5.2.1.8) (51 kDa FK506-binding protein) (51 kDa FKBP) (FKBP-51) (54 kDa progesterone receptor-associated immunophilin) (Androgen-regulated protein 6) (FF1 antigen) (FK506-binding protein 5) (FKBP-5) (FKBP54) (p54) (HSP90-binding immunophilin) (Rotamase)	FKBP5 AIG6 FKBP51	457	Q13451;	1KT0;3O5D;3O5E;3O5F;3O5G;3O5I;3O5J;3O5K;3O5L;3O5M;3O5O;3O5P;3O5Q;3O5R;4DRH;4DRI;4DRK;4DRM;4DRN;4DRO;4DRP;4DRQ;4JFI;4JFJ;4JFK;4JFL;4JFM;4R0X;4TW6;4TW7;4TX0;4W9O;4W9P;4W9Q;5BXJ;5DIT;5DIU;5DIV;5NJX;5OBK;5OMP;6SAF;6TX4;6TX5;6TX6;6TX7;6TX8;6TX9;6TXX;7A6W;7A6X;7AOT;7AOU;7APQ;7APS;7APT;7APW;7AWF;7AWX;7B9Y;7B9Z;7BA0;7ETT;7ETU;7ETV;7L7I;	No	No	No
Q13489	Baculoviral IAP repeat-containing protein 3 (EC 2.3.2.27) (Apoptosis inhibitor 2) (API2) (Cellular inhibitor of apoptosis 2) (C-IAP2) (IAP homolog C) (Inhibitor of apoptosis protein 1) (hIAP-1) (hIAP1) (RING finger protein 49) (RING-type E3 ubiquitin transferase BIRC3) (TNFR2-TRAF-signaling complex protein 1)	BIRC3 API2 MIHC RNF49	604	Q13489;	2UVL;3EB5;3EB6;3M0A;3M0D;7NK0;	No	No	No
Q13568	Interferon regulatory factor 5 (IRF-5)	IRF5	498	Q13568;	3DSH;	No	No	No
Q13576	Ras GTPase-activating-like protein IQGAP2	IQGAP2	1575	Q13576;	3IEZ;4EZA;5CJP;	No	No	No
Q13751	Laminin subunit beta-3 (Epiligrin subunit bata) (Kalinin B1 chain) (Kalinin subunit beta) (Laminin B1k chain) (Laminin-5 subunit beta) (Nicein subunit beta)	LAMB3 LAMNB1	1172	Q13751;	n/a	No	No	No
Q13753	Laminin subunit gamma-2 (Cell-scattering factor 140 kDa subunit) (CSF 140 kDa subunit) (Epiligrin subunit gamma) (Kalinin subunit gamma) (Kalinin/nicein/epiligrin 100 kDa subunit) (Ladsin 140 kDa subunit) (Laminin B2t chain) (Laminin-5 subunit gamma) (Large adhesive scatter factor 140 kDa subunit) (Nicein subunit gamma)	LAMC2 LAMB2T LAMNB2	1193	Q13753;	n/a	No	No	No
Q13790	Apolipoprotein F (Apo-F) (Lipid transfer inhibitor protein) (LTIP)	APOF	326	Q13790;	n/a	No	No	No
Q13813	Spectrin alpha chain, non-erythrocytic 1 (Alpha-II spectrin) (Fodrin alpha chain) (Spectrin, non-erythroid alpha subunit)	SPTAN1 NEAS SPTA2	2472	Q13813;	2FOT;3F31;3FB2;5FW9;5FWB;5FWC;6ZEH;	No	No	No
Q13835	Plakophilin-1 (Band 6 protein) (B6P)	PKP1	747	Q13835;	1XM9;	No	No	No
Q13938	Calcyphosin (Calcyphosine)	CAPS	275	Q13938;	3E3R;	No	No	No
Q13946	High affinity cAMP-specific 3',5'-cyclic phosphodiesterase 7A (EC 3.1.4.53) (HCP1) (TM22)	PDE7A	482	Q13946;	1ZKL;3G3N;4PM0;4Y2B;	No	No	No
Q14161	ARF GTPase-activating protein GIT2 (ARF GAP GIT2) (Cool-interacting tyrosine-phosphorylated protein 2) (CAT-2) (CAT2) (G protein-coupled receptor kinase-interactor 2) (GRK-interacting protein 2)	GIT2 KIAA0148	759	Q14161;	n/a	No	No	No
Q14164	Inhibitor of nuclear factor kappa-B kinase subunit epsilon (I-kappa-B kinase epsilon) (IKK-E) (IKK-epsilon) (IkBKE) (EC 2.7.11.10) (Inducible I kappa-B kinase) (IKK-i)	IKBKE IKKE IKKI KIAA0151	716	Q14164;	n/a	No	No	No
Q14185	Dedicator of cytokinesis protein 1 (180 kDa protein downstream of CRK) (DOCK180)	DOCK1	1865	Q14185;	3L4C;	No	No	No
Q14186	Transcription factor Dp-1 (DRTF1-polypeptide 1) (DRTF1) (E2F dimerization partner 1)	TFDP1 DP1	410	Q14186;	2AZE;5GOW;5TUU;5TUV;	No	No	No
Q14190	Single-minded homolog 2 (Class E basic helix-loop-helix protein 15) (bHLHe15)	SIM2 BHLHE15	667	Q14190;	n/a	No	No	No
Q14344	Guanine nucleotide-binding protein subunit alpha-13 (G alpha-13) (G-protein subunit alpha-13)	GNA13	377	Q14344;	7T6B;	No	No	No
Q14511	Enhancer of filamentation 1 (hEF1) (CRK-associated substrate-related protein) (CAS-L) (CasL) (Cas scaffolding protein family member 2) (CASS2) (Neural precursor cell expressed developmentally down-regulated protein 9) (NEDD-9) (Renal carcinoma antigen NY-REN-12) (p105) [Cleaved into: Enhancer of filamentation 1 p55]	NEDD9 CASL	834	Q14511;	2L81;5X3S;	No	No	No
Q14541	Hepatocyte nuclear factor 4-gamma (HNF-4-gamma) (Nuclear receptor subfamily 2 group A member 2)	HNF4G NR2A2	408	Q14541;	1LV2;	No	No	No
Q14566	DNA replication licensing factor MCM6 (EC 3.6.4.12) (p105MCM)	MCM6	821	Q14566;	2KLQ;2LE8;6XTX;6XTY;7PFO;7PLO;	No	No	No
Q14586	Zinc finger protein 267 (Zinc finger protein HZF2)	ZNF267	743	Q14586;	n/a	No	No	No
Q14592	Zinc finger protein 460 (Zinc finger protein 272) (Zinc finger protein HZF8)	ZNF460 ZNF272	562	Q14592;	n/a	No	No	No
Q14624	Inter-alpha-trypsin inhibitor heavy chain H4 (ITI heavy chain H4) (ITI-HC4) (Inter-alpha-inhibitor heavy chain 4) (Inter-alpha-trypsin inhibitor family heavy chain-related protein) (IHRP) (Plasma kallikrein sensitive glycoprotein 120) (Gp120) (PK-120) [Cleaved into: 70 kDa inter-alpha-trypsin inhibitor heavy chain H4; 35 kDa inter-alpha-trypsin inhibitor heavy chain H4]	ITIH4 IHRP ITIHL1 PK120 PRO1851	930	Q14624;	n/a	No	No	No
Q14651	Plastin-1 (Intestine-specific plastin) (I-plastin)	PLS1	629	Q14651;	n/a	No	No	No
Q14674	Separin (EC 3.4.22.49) (Caspase-like protein ESPL1) (Extra spindle poles-like 1 protein) (Separase)	ESPL1 ESP1 KIAA0165	2120	Q14674;	7NJ0;7NJ1;	No	No	No
Q14680	Maternal embryonic leucine zipper kinase (hMELK) (EC 2.7.11.1) (Protein kinase Eg3) (pEg3 kinase) (Protein kinase PK38) (hPK38) (Tyrosine-protein kinase MELK) (EC 2.7.10.2)	MELK KIAA0175	651	Q14680;	4BKY;4BKZ;4BL1;4D2P;4D2T;4D2V;4D2W;4IXP;4UMP;4UMQ;4UMR;4UMT;4UMU;5IH8;5IH9;5IHA;5IHC;5K00;5M5A;5MAF;5MAG;5MAH;5MAI;5TVT;5TWL;5TWU;5TWY;5TWZ;5TX3;6GVX;6VXR;	No	No	No
Q14691	DNA replication complex GINS protein PSF1 (GINS complex subunit 1)	GINS1 KIAA0186 PSF1	196	Q14691;	2E9X;2EHO;2Q9Q;6XTX;6XTY;7PFO;7PLO;	No	No	No
Q14765	Signal transducer and activator of transcription 4	STAT4	748	Q14765;	n/a	No	No	No
Q14774	H2.0-like homeobox protein (Homeobox protein HB24) (Homeobox protein HLX1)	HLX HLX1	488	Q14774;	n/a	No	No	No
Q14865	AT-rich interactive domain-containing protein 5B (ARID domain-containing protein 5B) (MRF1-like protein) (Modulator recognition factor 2) (MRF-2)	ARID5B DESRT MRF2	1188	Q14865;	1IG6;2OEH;	No	No	No
Q14919	Dr1-associated corepressor (Dr1-associated protein 1) (Negative cofactor 2-alpha) (NC2-alpha)	DRAP1	205	Q14919;	1JFI;	No	No	No
Q15003	Condensin complex subunit 2 (Barren homolog protein 1) (Chromosome-associated protein H) (hCAP-H) (Non-SMC condensin I complex subunit H) (XCAP-H homolog)	NCAPH BRRN BRRN1 CAPH KIAA0074	741	Q15003;	6IGX;	No	No	No
Q15027	Arf-GAP with coiled-coil, ANK repeat and PH domain-containing protein 1 (Centaurin-beta-1) (Cnt-b1)	ACAP1 CENTB1 KIAA0050	740	Q15027;	3JUE;3T9K;4CKG;4CKH;4F1P;4NSW;5H3D;	No	No	No
Q15052	Rho guanine nucleotide exchange factor 6 (Alpha-Pix) (COOL-2) (PAK-interacting exchange factor alpha) (Rac/Cdc42 guanine nucleotide exchange factor 6)	ARHGEF6 COOL2 KIAA0006 PIXA	776	Q15052;	1UJY;1WYR;	No	No	No
Q15078	Cyclin-dependent kinase 5 activator 1 (CDK5 activator 1) (Cyclin-dependent kinase 5 regulatory subunit 1) (TPKII regulatory subunit) [Cleaved into: Cyclin-dependent kinase 5 activator 1, p35 (p35); Cyclin-dependent kinase 5 activator 1, p25 (p25) (Tau protein kinase II 23 kDa subunit) (p23)]	CDK5R1 CDK5R NCK5A	307	Q15078;	1H4L;1UNG;1UNH;1UNL;3O0G;6LDP;7CNG;7VDP;7VDQ;7VDR;7VDS;	No	No	No
Q15119	[Pyruvate dehydrogenase (acetyl-transferring)] kinase isozyme 2, mitochondrial (EC 2.7.11.2) (Pyruvate dehydrogenase kinase isoform 2) (PDH kinase 2) (PDKII)	PDK2 PDHK2	407	Q15119;	2BTZ;2BU2;2BU5;2BU6;2BU7;2BU8;4MP2;4MP7;4MPC;4MPE;4MPN;4V25;4V26;5J6A;5J71;5M4K;5M4M;5M4N;5M4P;6LIL;6LIN;6LIO;6TMP;6TMQ;6TMZ;6TN0;6TN2;7EA0;7EAS;7EBH;7VBU;7VBV;7VBX;	No	No	No
Q15121	Astrocytic phosphoprotein PEA-15 (15 kDa phosphoprotein enriched in astrocytes) (Phosphoprotein enriched in diabetes) (PED)	PEA15	130	Q15121;	4IZ5;4IZA;6P6B;6P6C;	No	No	No
Q15257	Serine/threonine-protein phosphatase 2A activator (EC 5.2.1.8) (PP2A, subunit B', PR53 isoform) (Phosphotyrosyl phosphatase activator) (PTPA) (Serine/threonine-protein phosphatase 2A regulatory subunit 4) (Serine/threonine-protein phosphatase 2A regulatory subunit B')	PTPA PPP2R4	358	Q15257;	2G62;2HV6;2HV7;2IXM;4LAC;4NY3;	No	No	No
Q15293	Reticulocalbin-1	RCN1 RCN	331	Q15293;	n/a	No	No	No
Q15306	Interferon regulatory factor 4 (IRF-4) (Lymphocyte-specific interferon regulatory factor) (LSIRF) (Multiple myeloma oncogene 1) (NF-EM5)	IRF4 MUM1	451	Q15306;	2DLL;6TD4;7JM4;7O56;7OGS;7OOT;	No	No	No
Q15311	RalA-binding protein 1 (RalBP1) (76 kDa Ral-interacting protein) (Dinitrophenyl S-glutathione ATPase) (DNP-SG ATPase) (EC 7.6.2.2, EC 7.6.2.3) (Ral-interacting protein 1)	RALBP1 RLIP RLIP1 RLIP76	655	Q15311;	2KWH;2KWI;2MBG;6ZQT;6ZRN;	No	No	No
Q15329	Transcription factor E2F5 (E2F-5)	E2F5	346	Q15329;	5TUV;	No	No	No
Q15398	Disks large-associated protein 5 (DAP-5) (Discs large homolog 7) (Disks large-associated protein DLG7) (Hepatoma up-regulated protein) (HURP)	DLGAP5 DLG7 KIAA0008	846	Q15398;	n/a	No	No	No
Q15417	Calponin-3 (Calponin, acidic isoform)	CNN3	329	Q15417;	n/a	No	No	No
Q15436	Protein transport protein Sec23A (hSec23A) (SEC23-related protein A)	SEC23A	765	Q15436;	2NUP;2NUT;2YRC;2YRD;3EFO;3EG9;3EGD;3EGX;5KYN;5KYU;5KYW;5KYX;5KYY;5VNE;5VNF;5VNG;5VNH;5VNI;5VNJ;5VNK;5VNL;5VNM;5VNN;5VNO;	No	No	No
Q15437	Protein transport protein Sec23B (hSec23B) (SEC23-related protein B)	SEC23B	767	Q15437;	n/a	No	No	No
Q15475	Homeobox protein SIX1 (Sine oculis homeobox homolog 1)	SIX1	284	Q15475;	4EGC;	No	No	No
Q15506	Sperm surface protein Sp17 (Cancer/testis antigen 22) (CT22) (Sp17-1) (Sperm autoantigenic protein 17) (Sperm protein 17)	SPA17 SP17	151	Q15506;	n/a	No	No	No
Q15561	Transcriptional enhancer factor TEF-3 (TEA domain family member 4) (TEAD-4) (Transcription factor 13-like 1) (Transcription factor RTEF-1)	TEAD4 RTEF1 TCF13L1 TEF3	434	Q15561;	5GZB;5NO6;5OAQ;6GE3;6GE4;6GE5;6GE6;6GEC;6GEE;6GEG;6GEI;6GEK;6HIK;6Q2X;6Q36;6SEN;6SEO;	No	No	No
Q15562	Transcriptional enhancer factor TEF-4 (TEA domain family member 2) (TEAD-2)	TEAD2 TEF4	447	Q15562;	3L15;5DQ8;5DQE;5EMV;5HGU;6CDY;6E5G;6S60;6S64;6S66;6S69;6S6J;6UYB;6UYC;6VAH;7OYJ;	No	No	No
Q15583	Homeobox protein TGIF1 (5'-TG-3'-interacting factor 1)	TGIF1 TGIF	401	Q15583;	2LK2;6FQP;6FQQ;	No	No	No
Q15596	Nuclear receptor coactivator 2 (NCoA-2) (Class E basic helix-loop-helix protein 75) (bHLHe75) (Transcriptional intermediary factor 2) (hTIF2)	NCOA2 BHLHE75 SRC2 TIF2	1464	Q15596;	1GWQ;1GWR;1M2Z;1MV9;1MVC;1MZN;1P93;1T63;1T65;1UHL;1YOK;1ZDT;1ZDU;1ZKY;2AO6;2B1V;2B1Z;2B23;2FAI;2G44;2G5O;2LDC;2P15;2P1T;2P1U;2P1V;2Q7J;2Q7L;2YJD;2ZXZ;2ZY0;3A9E;3CLD;3DZU;3DZY;3E00;3E7C;3E94;3ERD;3FUG;3GN8;3K22;3K23;3KWY;3KYT;3L0E;3L0J;3L0L;3O1D;3O1E;3OAP;3OZJ;3PCU;3PLZ;3Q95;3R5M;3UP0;3UP3;4CSJ;4DOS;4E2J;4FHH;4FHI;4IA1;4IA2;4IA3;4IA7;4IQR;4IU7;4IUI;4IV2;4IV4;4IVW;4IVY;4IW6;4IW8;4IWC;4IWF;4K4J;4K6I…	No	No	No
Q15645	Pachytene checkpoint protein 2 homolog (Human papillomavirus type 16 E1 protein-binding protein) (16E1-BP) (HPV16 E1 protein-binding protein) (Thyroid hormone receptor interactor 13) (Thyroid receptor-interacting protein 13) (TR-interacting protein 13) (TRIP-13)	TRIP13 PCH2	432	Q15645;	5VQ9;5VQA;5WC2;6F0X;6LK0;7L9P;	No	No	No
Q15646	2'-5'-oligoadenylate synthase-like protein (2'-5'-OAS-related protein) (2'-5'-OAS-RP) (59 kDa 2'-5'-oligoadenylate synthase-like protein) (Thyroid receptor-interacting protein 14) (TR-interacting protein 14) (TRIP-14) (p59 OASL) (p59OASL)	OASL TRIP14	514	Q15646;	1WH3;4XQ7;	No	No	No
Q15672	Twist-related protein 1 (Class A basic helix-loop-helix protein 38) (bHLHa38) (H-twist)	TWIST1 BHLHA38 TWIST	202	Q15672;	2MJV;	No	No	No
Q15691	Microtubule-associated protein RP/EB family member 1 (APC-binding protein EB1) (End-binding protein 1) (EB1)	MAPRE1	268	Q15691;	1PA7;1TXQ;1UEG;1VKA;1WU9;1YIB;1YIG;2HKQ;2HL3;2HL5;2QJZ;2R8U;3GJO;3MTU;3MUD;3TQ7;4XA1;4XA3;4XA6;5JV3;5JVM;5JVP;5JVR;5JVS;5JVU;5JX1;5WLQ;6PF2;6PFP;6YF5;6YSH;	No	No	No
Q15699	ALX homeobox protein 1 (Cartilage homeoprotein 1) (CART-1)	ALX1 CART1	326	Q15699;	n/a	No	No	No
Q15742	NGFI-A-binding protein 2 (EGR-1-binding protein 2) (Melanoma-associated delayed early response protein) (Protein MADER)	NAB2 MADER	525	Q15742;	n/a	No	No	No
Q15785	Mitochondrial import receptor subunit TOM34 (hTom34) (Translocase of outer membrane 34 kDa subunit)	TOMM34 URCC3	309	Q15785;	n/a	No	No	No
Q15833	Syntaxin-binding protein 2 (Protein unc-18 homolog 2) (Unc18-2) (Protein unc-18 homolog B) (Unc-18B)	STXBP2 UNC18B	593	Q15833;	4CCA;	No	No	No
Q15910	Histone-lysine N-methyltransferase EZH2 (EC 2.1.1.356) (ENX-1) (Enhancer of zeste homolog 2) (Lysine N-methyltransferase 6)	EZH2 KMT6	746	Q15910;	4MI0;4MI5;5GSA;5H14;5H15;5H17;5H19;5H24;5H25;5HYN;5IJ7;5IJ8;5LS6;5U5T;5U62;5WG6;5WUK;6C23;6C24;6LO2;6P5L;6U4Y;6WKR;7AT8;7QJG;7QJU;7QK4;	No	No	No
Q15928	Zinc finger protein 141	ZNF141 D4S90	474	Q15928;	n/a	No	No	No
Q16352	Alpha-internexin (Alpha-Inx) (66 kDa neurofilament protein) (NF-66) (Neurofilament-66) (Neurofilament 5)	INA NEF5	499	Q16352;	n/a	No	No	No
Q16363	Laminin subunit alpha-4 (Laminin-14 subunit alpha) (Laminin-8 subunit alpha) (Laminin-9 subunit alpha)	LAMA4	1823	Q16363;	n/a	No	No	No
Q16520	Basic leucine zipper transcriptional factor ATF-like (B-cell-activating transcription factor) (B-ATF) (SF-HT-activated gene 2 protein) (SFA-2)	BATF	125	Q16520;	n/a	No	No	No
Q16548	Bcl-2-related protein A1 (Bcl-2-like protein 5) (Bcl2-L-5) (Hemopoietic-specific early response protein) (Protein BFL-1) (Protein GRS)	BCL2A1 BCL2L5 BFL1 GRS HBPA1	175	Q16548;	2VM6;3I1H;3MQP;4ZEQ;5UUK;5UUL;5UUP;5WHH;5WHI;6E3I;6E3J;6MBB;6MBC;6RJP;6VO4;	No	No	No
Q16610	Extracellular matrix protein 1 (Secretory component p85)	ECM1	540	Q16610;	n/a	No	No	No
Q16665	Hypoxia-inducible factor 1-alpha (HIF-1-alpha) (HIF1-alpha) (ARNT-interacting protein) (Basic-helix-loop-helix-PAS protein MOP1) (Class E basic helix-loop-helix protein 78) (bHLHe78) (Member of PAS protein 1) (PAS domain-containing protein 8)	HIF1A BHLHE78 MOP1 PASD8	826	Q16665;	1H2K;1H2L;1H2M;1L3E;1L8C;1LM8;1LQB;2ILM;3HQR;3HQU;4AJY;4H6J;5JWP;5L9B;5L9V;5LA9;5LAS;6GFX;6GMR;6YW3;7LVS;7QGS;	No	No	No
Q16666	Gamma-interferon-inducible protein 16 (Ifi-16) (Interferon-inducible myeloid differentiation transcriptional activator)	IFI16 IFNGIP1	785	Q16666;	2OQ0;3B6Y;3RLN;3RLO;3RNU;4QGU;	No	No	No
Q16676	Forkhead box protein D1 (Forkhead-related protein FKHL8) (Forkhead-related transcription factor 4) (FREAC-4)	FOXD1 FKHL8 FREAC4	465	Q16676;	n/a	No	No	No
Q16678	Cytochrome P450 1B1 (EC 1.14.14.1) (CYPIB1) (Hydroperoxy icosatetraenoate dehydratase) (EC 4.2.1.152)	CYP1B1	543	Q16678;	3PM0;6IQ5;	No	No	No
Q16798	NADP-dependent malic enzyme, mitochondrial (NADP-ME) (EC 1.1.1.40) (Malic enzyme 3)	ME3	604	Q16798;	n/a	No	No	No
Q17RC7	Exocyst complex component 3-like protein 4	EXOC3L4 C14orf73	722	Q17RC7;	n/a	No	No	No
Q17RM4	Coiled-coil domain-containing protein 142	CCDC142 PSEC0243	750	Q17RM4;	n/a	No	No	No
Q27J81	Inverted formin-2 (HBEBP2-binding protein C)	INF2 C14orf151 C14orf173	1249	Q27J81;	n/a	No	No	No
Q2M3V2	Ankyrin repeat domain-containing protein SOWAHA (Ankyrin repeat domain-containing protein 43) (Protein sosondowah homolog A)	SOWAHA ANKRD43	549	Q2M3V2;	n/a	No	No	No
Q2NL98	Vimentin-type intermediate filament-associated coiled-coil protein	VMAC	169	Q2NL98;	n/a	No	No	No
Q2PPJ7	Ral GTPase-activating protein subunit alpha-2 (250 kDa substrate of Akt) (AS250) (p220)	RALGAPA2 C20orf74 KIAA1272	1873	Q2PPJ7;	n/a	No	No	No
Q32MZ4	Leucine-rich repeat flightless-interacting protein 1 (LRR FLII-interacting protein 1) (GC-binding factor 2) (TAR RNA-interacting protein)	LRRFIP1 GCF2 TRIP	808	Q32MZ4;	4H22;	No	No	No
Q32P28	Prolyl 3-hydroxylase 1 (EC 1.14.11.7) (Growth suppressor 1) (Leucine- and proline-enriched proteoglycan 1) (Leprecan-1)	P3H1 GROS1 LEPRE1 PSEC0109	736	Q32P28;	n/a	No	No	No
Q38SD2	Leucine-rich repeat serine/threonine-protein kinase 1 (EC 2.7.11.1)	LRRK1 KIAA1790	2015	Q38SD2;	n/a	No	No	No
Q3KR16	Pleckstrin homology domain-containing family G member 6 (PH domain-containing family G member 6) (Myosin-interacting guanine nucleotide exchange factor) (MyoGEF)	PLEKHG6	790	Q3KR16;	n/a	No	No	No
Q3MJ40	Putative coiled-coil domain-containing protein 144B (Coiled-coil domain-containing protein 144B, pseudogene)	CCDC144BP CCDC144B	725	Q3MJ40;	n/a	No	No	No
Q3ZCX4	Zinc finger protein 568	ZNF568	644	Q3ZCX4;	n/a	No	No	No
Q495B1	Ankyrin repeat and death domain-containing protein 1A	ANKDD1A	522	Q495B1;	n/a	No	No	No
Q495Y8	Speedy protein E2	SPDYE2	402	Q495Y8;	n/a	No	No	No
Q53EZ4	Centrosomal protein of 55 kDa (Cep55) (Up-regulated in colon cancer 6)	CEP55 C10orf3 URCC6	464	Q53EZ4;	3E1R;3WUT;3WUU;3WUV;	No	No	No
Q53H82	Endoribonuclease LACTB2 (EC 3.1.27.-) (Beta-lactamase-like protein 2)	LACTB2 CGI-83	288	Q53H82;	4AD9;	No	No	No
Q53LP3	Ankyrin repeat domain-containing protein SOWAHC (Ankyrin repeat domain-containing protein 57) (Protein sosondowah homolog C)	SOWAHC ANKRD57 C2orf26	525	Q53LP3;	n/a	No	No	No
Q53QZ3	Rho GTPase-activating protein 15 (ArhGAP15) (Rho-type GTPase-activating protein 15)	ARHGAP15 BM-024 BM-030 BM-046	475	Q53QZ3;	3BYI;	No	No	No
Q58A45	PAN2-PAN3 deadenylation complex subunit PAN3 (PAB1P-dependent poly(A)-specific ribonuclease) (Poly(A)-nuclease deadenylation complex subunit 3) (PAN deadenylation complex subunit 3)	PAN3	887	Q58A45;	n/a	No	No	No
Q5EE01	Centromere protein W (CENP-W) (Cancer-up-regulated gene 2 protein)	CENPW C6orf173 CUG2	88	Q5EE01;	7QOO;7R5S;7YWX;	No	No	No
Q5EG05	Caspase recruitment domain-containing protein 16 (Caspase recruitment domain-only protein 1) (CARD-only protein 1) (Caspase-1 inhibitor COP) (Pseudo interleukin-1 beta converting enzyme) (Pseudo-ICE) (Pseudo-IL1B-converting enzyme)	CARD16 COP COP1	197	Q5EG05;	n/a	No	No	No
Q5H9U9	Probable ATP-dependent RNA helicase DDX60-like (EC 3.6.4.13) (DEAD box protein 60-like)	DDX60L	1706	Q5H9U9;	n/a	No	No	No
Q5HYC2	Uncharacterized protein KIAA2026	KIAA2026	2103	Q5HYC2;	n/a	No	No	No
Q5HYI7	Metaxin-3	MTX3	312	Q5HYI7;	n/a	No	No	No
Q5HYK9	Zinc finger protein 667	ZNF667	610	Q5HYK9;	n/a	No	No	No
Q5JPF3	Ankyrin repeat domain-containing protein 36C (Protein immuno-reactive with anti-PTH polyclonal antibodies)	ANKRD36C	1778	Q5JPF3;	n/a	No	No	No
Q5JPI3	Uncharacterized protein C3orf38	C3orf38	329	Q5JPI3;	n/a	No	No	No
Q5JSL3	Dedicator of cytokinesis protein 11 (Activated Cdc42-associated guanine nucleotide exchange factor) (ACG) (Zizimin-2)	DOCK11 ZIZ2	2073	Q5JSL3;	n/a	No	No	No
Q5JSP0	FYVE, RhoGEF and PH domain-containing protein 3 (Zinc finger FYVE domain-containing protein 5)	FGD3 ZFYVE5	725	Q5JSP0;	2COC;	No	No	No
Q5JVG8	Zinc finger protein 506	ZNF506	444	Q5JVG8;	n/a	No	No	No
Q5JWR5	Protein dopey-1	DOP1A DOPEY1 KIAA1117	2465	Q5JWR5;	n/a	No	No	No
Q5JYT7	Uncharacterized protein KIAA1755	KIAA1755	1200	Q5JYT7;	n/a	No	No	No
Q5K651	Sterile alpha motif domain-containing protein 9 (SAM domain-containing protein 9)	SAMD9 C7orf5 DRIF1 KIAA2004 OEF1	1589	Q5K651;	7KSP;	No	No	No
Q5M775	Cytospin-B (Nuclear structure protein 5) (NSP5) (Sperm antigen HCMOGT-1) (Sperm antigen with calponin homology and coiled-coil domains 1)	SPECC1 CYTSB NSP5	1068	Q5M775;	n/a	No	No	No
Q5QJ74	Tubulin-specific chaperone cofactor E-like protein (EL) (Leucine-rich repeat-containing protein 35)	TBCEL LRRC35	424	Q5QJ74;	n/a	No	No	No
Q5S007	Leucine-rich repeat serine/threonine-protein kinase 2 (EC 2.7.11.1) (EC 3.6.5.-) (Dardarin)	LRRK2 PARK8	2527	Q5S007;	2ZEJ;3D6T;5MY9;5MYC;6DLO;6DLP;6OJE;6OJF;6VNO;6VP6;6VP7;6XAF;6XR4;7LHT;7LHW;7LI3;7LI4;	No	No	No
Q5SRH9	Tetratricopeptide repeat protein 39A (TPR repeat protein 39A) (Differentially expressed in MCF7 with estradiol protein 6) (DEME-6)	TTC39A C1orf34 KIAA0452	613	Q5SRH9;	n/a	No	No	No
Q5T0U0	Coiled-coil domain-containing protein 122	CCDC122	273	Q5T0U0;	n/a	No	No	No
Q5T230	Undifferentiated embryonic cell transcription factor 1	UTF1	341	Q5T230;	n/a	No	No	No
Q5T5U3	Rho GTPase-activating protein 21 (Rho GTPase-activating protein 10) (Rho-type GTPase-activating protein 21)	ARHGAP21 ARHGAP10 KIAA1424	1958	Q5T5U3;	2DHJ;2J59;2YUY;	No	No	No
Q5T6S3	PHD finger protein 19 (Polycomb-like protein 3) (hPCL3)	PHF19 PCL3	580	Q5T6S3;	2E5Q;4BD3;6NQ3;6WAU;	No	No	No
Q5TAA0	Tetratricopeptide repeat protein 22 (TPR repeat protein 22)	TTC22	569	Q5TAA0;	n/a	No	No	No
Q5TB30	DEP domain-containing protein 1A	DEPDC1 DEPDC1A	811	Q5TB30;	2YSR;	No	No	No
Q5TBC7	Bcl-2-like protein 15 (Bcl2-L-15) (Bcl-2 family kin) (Bfk)	BCL2L15 C1orf178	163	Q5TBC7;	7CCL;7CCM;	No	No	No
Q5TC82	Roquin-1 (Roquin) (EC 2.3.2.27) (RING finger and C3H zinc finger protein 1) (RING finger and CCCH-type zinc finger domain-containing protein 1) (RING finger protein 198)	RC3H1 KIAA2025 RNF198	1133	Q5TC82;	3X1O;4QIK;4QIL;4ULW;4YWQ;	No	No	No
Q5TC84	Opioid growth factor receptor-like protein 1	OGFRL1	451	Q5TC84;	n/a	No	No	No
Q5TF58	Intermediate filament family orphan 2	IFFO2	517	Q5TF58;	n/a	No	No	No
Q5TIA1	Meiosis inhibitor protein 1 (Meiosis defective protein 1)	MEI1	1274	Q5TIA1;	n/a	No	No	No
Q5VT79	Annexin A8-like protein 1	ANXA8L1 ANXA8L2	327	Q5VT79;	n/a	No	No	No
Q5VV41	Rho guanine nucleotide exchange factor 16 (Ephexin-4)	ARHGEF16 EPHEXIN4 NBR	709	Q5VV41;	1X6B;	No	No	No
Q5VYY1	Ankyrin repeat domain-containing protein 22	ANKRD22	191	Q5VYY1;	n/a	No	No	No
Q5W041	Armadillo repeat-containing protein 3 (Beta-catenin-like protein) (Cancer/testis antigen 81) (CT81) (KU-CT-1)	ARMC3	872	Q5W041;	n/a	No	No	No
Q5XG87	Terminal nucleotidyltransferase 4A (DNA polymerase sigma) (LAK-1) (Non-canonical poly(A) RNA polymerase PAPD7) (EC 2.7.7.19) (PAP-associated domain-containing protein 7) (TRAMP-like complex polyadenylate polymerase) (Terminal guanylyltransferase) (EC 2.7.7.-) (Terminal uridylyltransferase 5) (TUTase 5) (Topoisomerase-related function protein 4-1) (TRF4-1)	TENT4A PAPD7 POLS TRF4	772	Q5XG87;	n/a	No	No	No
Q68DA7	Formin-1 (Limb deformity protein homolog)	FMN1 FMN LD	1419	Q68DA7;	n/a	No	No	No
Q68DE3	Basic helix-loop-helix domain-containing protein USF3 (Upstream transcription factor 3)	USF3 KIAA2018	2245	Q68DE3;	n/a	No	No	No
Q68DK2	Zinc finger FYVE domain-containing protein 26 (FYVE domain-containing centrosomal protein) (FYVE-CENT) (Spastizin)	ZFYVE26 KIAA0321	2539	Q68DK2;	n/a	No	No	No
Q68DY9	Zinc finger protein 772	ZNF772	489	Q68DY9;	n/a	No	No	No
Q6B0K9	Hemoglobin subunit mu (Hemoglobin mu chain) (Mu-globin)	HBM HBAP2	141	Q6B0K9;	n/a	No	No	No
Q6FI13	Histone H2A type 2-A (H2A-clustered histone 18) (H2A-clustered histone 19) (Histone H2A.2) (Histone H2A/o)	H2AC18 H2AFO HIST2H2AA HIST2H2AA3; H2AC19 HIST2H2AA4	130	Q6FI13;	6SE6;6SEE;6SEF;6SEG;6Y5D;7JZV;	No	No	No
Q6ICG6	Uncharacterized protein KIAA0930	KIAA0930 C22orf9	404	Q6ICG6;	n/a	No	No	No
Q6IE36	Ovostatin homolog 2	OVOS2	1432	Q6IE36;	n/a	No	No	No
Q6K0P9	Pyrin and HIN domain-containing protein 1 (Interferon-inducible protein X)	PYHIN1 IFIX	492	Q6K0P9;	n/a	No	No	No
Q6KB66	Keratin, type II cytoskeletal 80 (Cytokeratin-80) (CK-80) (Keratin-80) (K80) (Type-II keratin Kb20)	KRT80 KB20	452	Q6KB66;	n/a	No	No	No
Q6MZQ0	Proline-rich protein 5-like (Protein observed with Rictor-2) (Protor-2)	PRR5L PROTOR2	368	Q6MZQ0;	n/a	No	No	No
Q6MZZ7	Calpain-13 (EC 3.4.22.-) (Calcium-activated neutral proteinase 13) (CANP 13)	CAPN13	669	Q6MZZ7;	2I7A;	No	No	No
Q6NSW7	Homeobox protein NANOGP8	NANOGP8	305	Q6NSW7;	n/a	No	No	No
Q6P0N0	Mis18-binding protein 1 (Kinetochore-associated protein KNL-2 homolog) (HsKNL-2) (P243)	MIS18BP1 C14orf106 KIAA1903 KNL2 M18BP1	1132	Q6P0N0;	1WGX;	No	No	No
Q6P0Q8	Microtubule-associated serine/threonine-protein kinase 2 (EC 2.7.11.1)	MAST2 KIAA0807 MAST205	1798	Q6P0Q8;	2KQF;2KYL;	No	No	No
Q6P4F7	Rho GTPase-activating protein 11A (Rho-type GTPase-activating protein 11A)	ARHGAP11A KIAA0013	1023	Q6P4F7;	3EAP;	No	No	No
Q6P589	Tumor necrosis factor alpha-induced protein 8-like protein 2 (TIPE2) (TNF alpha-induced protein 8-like protein 2) (TNFAIP8-like protein 2) (Inflammation factor protein 20)	TNFAIP8L2	184	Q6P589;	3F4M;	No	No	No
Q6P597	Kinesin light chain 3 (KLC2-like) (kinesin light chain 2)	KLC3 KLC2 KLC2L	504	Q6P597;	n/a	No	No	No
Q6PEW1	Zinc finger CCHC domain-containing protein 12 (Smad-interacting zinc finger protein 1)	ZCCHC12 SIZN1	402	Q6PEW1;	n/a	No	No	No
Q6PF15	Kelch-like protein 35	KLHL35	583	Q6PF15;	n/a	No	No	No
Q6PG37	Zinc finger protein 790	ZNF790	636	Q6PG37;	n/a	No	No	No
Q6PIF6	Unconventional myosin-VIIb	MYO7B	2116	Q6PIF6;	5MV7;5MV8;5XBF;	No	No	No
Q6PIY5	Armadillo-like helical domain containing protein 1 (p40)	ARMH1 C1orf228 NCRNA00082	440	Q6PIY5;	n/a	No	No	No
Q6PK81	Zinc finger protein 773 (Zinc finger protein 419B)	ZNF773 ZNF419B	442	Q6PK81;	n/a	No	No	No
Q6PL18	ATPase family AAA domain-containing protein 2 (EC 3.6.1.-) (AAA nuclear coregulator cancer-associated protein) (ANCCA)	ATAD2 L16 PRO2000	1390	Q6PL18;	3DAI;4QSP;4QSQ;4QSR;4QSS;4QST;4QSU;4QSV;4QSW;4QSX;4QUT;4QUU;4TT2;4TT4;4TT6;4TTE;4TU4;4TU6;4TYL;4TZ2;4TZ8;5A5N;5A5O;5A5P;5A5Q;5A5R;5A81;5A82;5A83;5EPB;5F36;5F3A;5LJ0;5QXI;5QXJ;5QXK;5QXL;5QXM;5QXN;5QXO;5QXP;5QXQ;5QXR;5QXS;5QXT;5QXU;5QXV;5QXW;5QXX;5QXY;5QXZ;5QY0;5R4E;5R4F;5R4V;5R4W;5R4X;5R4Y;5R4Z;6CPS;6EPJ;6EPR;6EPS;6EPT;6EPU;6EPV;6EPW;6EPX;6HDN;6HDO;6HI3;6HI4;6HI5;6HI6;6HI7;6HI8;6HIA;6HIB;6HIC;6HID…	No	No	No
Q6SZW1	NAD(+) hydrolase SARM1 (NADase SARM1) (hSARM1) (EC 3.2.2.6) (NADP(+) hydrolase SARM1) (EC 3.2.2.-) (Sterile alpha and Armadillo repeat protein) (Sterile alpha and TIR motif-containing protein 1) (Sterile alpha motif domain-containing protein 2) (MyD88-5) (SAM domain-containing protein 2) (Tir-1 homolog) (HsTIR)	SARM1 KIAA0524 SAMD2 SARM	724	Q6SZW1;	6O0Q;6O0R;6O0S;6O0T;6O0U;6O0V;6O1B;6QWV;6WPK;6ZFX;6ZG0;6ZG1;7ANW;7CM5;7CM6;7CM7;7DJT;7KNQ;7LD0;7NAG;7NAH;7NAI;7NAJ;7NAK;7NAL;	No	No	No
Q6TFL3	Coiled-coil domain-containing protein 171	CCDC171 C9orf93	1326	Q6TFL3;	n/a	No	No	No
Q6UWY5	Olfactomedin-like protein 1	OLFML1 UNQ564/PRO1126	402	Q6UWY5;	n/a	No	No	No
Q6UXY1	Brain-specific angiogenesis inhibitor 1-associated protein 2-like protein 2 (BAI1-associated protein 2-like protein 2) (Planar intestinal- and kidney-specific BAR domain protein) (Pinkbar)	BAIAP2L2 UNQ9336/PRO34007	529	Q6UXY1;	n/a	No	No	No
Q6ZMY3	SPOC domain-containing protein 1	SPOCD1	1216	Q6ZMY3;	n/a	No	No	No
Q6ZN08	Putative zinc finger protein 66 (Zinc finger protein 66 pseudogene)	ZNF66 ZNF66P	573	Q6ZN08;	n/a	No	No	No
Q6ZN28	Metastasis-associated in colon cancer protein 1 (SH3 domain-containing protein 7a5)	MACC1	852	Q6ZN28;	n/a	No	No	No
Q6ZN66	Guanylate-binding protein 6 (EC 3.6.5.-) (GTP-binding protein 6) (GBP-6) (Guanine nucleotide-binding protein 6)	GBP6	633	Q6ZN66;	n/a	No	No	No
Q6ZNG9	KRAB-A domain-containing protein 2	KRBA2	492	Q6ZNG9;	n/a	No	No	No
Q6ZNL6	FYVE, RhoGEF and PH domain-containing protein 5 (Zinc finger FYVE domain-containing protein 23)	FGD5 ZFYVE23	1462	Q6ZNL6;	3MPX;	No	No	No
Q6ZP65	BICD family-like cargo adapter 1 (Bicaudal D-related protein 1) (BICD-related protein 1) (BICDR-1) (Coiled-coil domain-containing protein 64A) (CCDC64A)	BICDL1 BICDR1 CCDC64	573	Q6ZP65;	n/a	No	No	No
Q6ZRI8	Rho GTPase-activating protein 36	ARHGAP36	547	Q6ZRI8;	n/a	No	No	No
Q6ZS72	Protein PEAK3	PEAK3 C19orf35	473	Q6ZS72;	n/a	No	No	No
Q6ZSI9	Calpain-12 (EC 3.4.22.-) (Calcium-activated neutral proteinase 12) (CANP 12)	CAPN12	719	Q6ZSI9;	n/a	No	No	No
Q6ZUM4	Rho GTPase-activating protein 27 (CIN85-associated multi-domain-containing Rho GTPase-activating protein 1) (Rho-type GTPase-activating protein 27) (SH3 domain-containing protein 20)	ARHGAP27 CAMGAP1 SH3D20 PP905	889	Q6ZUM4;	3PP2;	No	No	No
Q6ZUS6	Coiled-coil domain-containing protein 149	CCDC149	474	Q6ZUS6;	n/a	No	No	No
Q6ZV50	DNA-binding protein RFX8 (Regulatory factor X 8)	RFX8	586	Q6ZV50;	n/a	No	No	No
Q6ZVM7	TOM1-like protein 2 (Target of Myb-like protein 2)	TOM1L2	507	Q6ZVM7;	n/a	No	No	No
Q6ZW31	Rho GTPase-activating protein SYDE1 (Synapse defective protein 1 homolog 1) (Protein syd-1 homolog 1)	SYDE1	735	Q6ZW31;	n/a	No	No	No
Q70J99	Protein unc-13 homolog D (Munc13-4)	UNC13D	1090	Q70J99;	n/a	No	No	No
Q71UI9	Histone H2A.V (H2A.F/Z) (H2A.Z variant histone 2)	H2AZ2 H2AFV H2AV	128	Q71UI9;	3WAA;6M4D;	No	No	No
Q7L190	Developmental pluripotency-associated protein 4	DPPA4	304	Q7L190;	n/a	No	No	No
Q7L1Q6	eIF5-mimic protein 2 (Basic leucine zipper and W2 domain-containing protein 1) (Protein Orf)	BZW1 5MP2 BZAP45 KIAA0005	419	Q7L1Q6;	n/a	No	No	No
Q7L4P6	BEN domain-containing protein 5	BEND5 C1orf165	421	Q7L4P6;	n/a	No	No	No
Q7L7L0	Histone H2A type 3 (H2A-clustered histone 25)	H2AC25 H2AW HIST3H2A	130	Q7L7L0;	n/a	No	No	No
Q7L945	Zinc finger protein 627	ZNF627	461	Q7L945;	n/a	No	No	No
Q7L9B9	Endonuclease/exonuclease/phosphatase family domain-containing protein 1	EEPD1 KIAA1706	569	Q7L9B9;	n/a	No	No	No
Q7LBR1	Charged multivesicular body protein 1b (CHMP1.5) (Chromatin-modifying protein 1b) (CHMP1b) (Vacuolar protein sorting-associated protein 46-2) (Vps46-2) (hVps46-2)	CHMP1B C18orf2	199	Q7LBR1;	3EAB;3JC1;4TXQ;4TXR;6E8G;6TZ4;6TZ5;6TZ9;	No	No	No
Q7LDG7	RAS guanyl-releasing protein 2 (Calcium and DAG-regulated guanine nucleotide exchange factor I) (CalDAG-GEFI) (Cdc25-like protein) (hCDC25L) (F25B3.3 kinase-like protein)	RASGRP2 CDC25L MCG7	609	Q7LDG7;	2MA2;6AXF;	No	No	No
Q7RTR0	NACHT, LRR and PYD domains-containing protein 9 (Nucleotide-binding oligomerization domain protein 6) (PYRIN and NACHT-containing protein 12)	NLRP9 NALP9 NOD6 PAN12	991	Q7RTR0;	6Z2G;7BSO;	No	No	No
Q7RTR2	NLR family CARD domain-containing protein 3 (CARD15-like protein) (Caterpiller protein 16.2) (CLR16.2) (NACHT, LRR and CARD domains-containing protein 3) (Nucleotide-binding oligomerization domain protein 3)	NLRC3 NOD3	1065	Q7RTR2;	n/a	No	No	No
Q7RTU7	Basic helix-loop-helix transcription factor scleraxis (Class A basic helix-loop-helix protein 41) (bHLHa41) (Class A basic helix-loop-helix protein 48) (bHLHa48)	SCX BHLHA41 BHLHA48 SCXA SCXB	201	Q7RTU7;	n/a	No	No	No
Q7Z2W4	Zinc finger CCCH-type antiviral protein 1 (ADP-ribosyltransferase diphtheria toxin-like 13) (ARTD13) (Inactive Poly [ADP-ribose] polymerase 13) (PARP13) (Zinc finger CCCH domain-containing protein 2) (Zinc finger antiviral protein) (ZAP)	ZC3HAV1 ZC3HDC2 PRO1677	902	Q7Z2W4;	2X5Y;4X52;6UEI;6UEJ;7KZH;7TGQ;	No	No	No
Q7Z2Y8	Interferon-induced very large GTPase 1 (Interferon-induced very large GTPase pseudogene 1)	GVINP1 GVIN1 VLIG1	2422	Q7Z2Y8;	n/a	No	No	No
Q7Z3E5	LisH domain-containing protein ARMC9 (Armadillo repeat-containing protein 9) (Melanoma/melanocyte-specific tumor antigen KU-MEL-1) (NS21)	ARMC9 KIAA1868	818	Q7Z3E5;	n/a	No	No	No
Q7Z406	Myosin-14 (Myosin heavy chain 14) (Myosin heavy chain, non-muscle IIc) (Non-muscle myosin heavy chain IIc) (NMHC II-C)	MYH14 KIAA2034 FP17425	1995	Q7Z406;	5I4E;5JLH;	No	No	No
Q7Z4N8	Prolyl 4-hydroxylase subunit alpha-3 (4-PH alpha-3) (EC 1.14.11.2) (Procollagen-proline,2-oxoglutarate-4-dioxygenase subunit alpha-3)	P4HA3 UNQ711/PRO1374	544	Q7Z4N8;	n/a	No	No	No
Q7Z614	Sorting nexin-20 (Selectin ligand-interactor cytoplasmic 1) (SLIC-1)	SNX20 SLIC1	316	Q7Z614;	n/a	No	No	No
Q7Z628	Neuroepithelial cell-transforming gene 1 protein (Proto-oncogene p65 Net1) (Rho guanine nucleotide exchange factor 8)	NET1 ARHGEF8	596	Q7Z628;	3EO2;4XH9;	No	No	No
Q7Z6I6	Rho GTPase-activating protein 30 (Rho-type GTPase-activating protein 30)	ARHGAP30	1101	Q7Z6I6;	n/a	No	No	No
Q7Z6J4	FYVE, RhoGEF and PH domain-containing protein 2 (Zinc finger FYVE domain-containing protein 4)	FGD2 ZFYVE4	655	Q7Z6J4;	n/a	No	No	No
Q7Z6K4	Notch-regulated ankyrin repeat-containing protein	NRARP	114	Q7Z6K4;	6PY8;	No	No	No
Q7Z6P3	Ras-related protein Rab-44	RAB44	1021	Q7Z6P3;	n/a	No	No	No
Q86SG5	Protein S100-A7A (S100 calcium-binding protein A15) (S100 calcium-binding protein A7-like 1) (S100 calcium-binding protein A7A)	S100A7A S100A15 S100A7L1	101	Q86SG5;	4AQI;	No	No	No
Q86SQ0	Pleckstrin homology-like domain family B member 2 (Protein LL5-beta)	PHLDB2 LL5B	1253	Q86SQ0;	n/a	No	No	No
Q86SX3	Tubulin epsilon and delta complex protein 1	TEDC1 C14orf80	495	Q86SX3;	n/a	No	No	No
Q86TE4	Leucine zipper protein 2	LUZP2 UNQ2566/PRO6246	346	Q86TE4;	n/a	No	No	No
Q86TG7	Retrotransposon-derived protein PEG10 (Embryonal carcinoma differentiation-regulated protein) (Mammalian retrotransposon-derived protein 2) (Myelin expression factor 3-like protein 1) (MEF3-like protein 1) (Paternally expressed gene 10 protein) (Retrotransposon gag domain-containing protein 3) (Retrotransposon-derived gag-like polyprotein) (Ty3/Gypsy-like protein)	PEG10 EDR KIAA1051e MAR2 MART2 MEF3L1 RGAG3	708	Q86TG7;	7LGA;	No	No	No
Q86TI0	TBC1 domain family member 1	TBC1D1 KIAA1108	1168	Q86TI0;	3QYE;	No	No	No
Q86U86	Protein polybromo-1 (hPB1) (BRG1-associated factor 180) (BAF180) (Polybromo-1D)	PBRM1 BAF180 PB1	1689	Q86U86;	2KTB;3G0J;3HMF;3IU5;3IU6;3K2J;3LJW;3MB4;3TLP;4Q0N;4Q0O;4Y03;5E7D;5FH6;5FH7;5FH8;5HRV;5HRW;5HRX;5II1;5II2;5IID;6OXB;6ZN6;6ZNV;6ZS3;6ZS4;7VDV;	No	No	No
Q86UD0	Suppressor APC domain-containing protein 2 (Tumor specificity and mitosis phase-dependent expression protein) (TS/MDEP) (p42.3)	SAPCD2 C9orf140	394	Q86UD0;	n/a	No	No	No
Q86UT6	NLR family member X1 (Caterpiller protein 11.3) (CLR11.3) (Nucleotide-binding oligomerization domain protein 5) (Nucleotide-binding oligomerization domain protein 9)	NLRX1 NOD5 NOD9	975	Q86UT6;	3UN9;	No	No	No
Q86UX7	Fermitin family homolog 3 (Kindlin-3) (MIG2-like protein) (Unc-112-related protein 2)	FERMT3 KIND3 MIG2B URP2	667	Q86UX7;	2YS3;6V97;6V9G;7C3M;	No	No	No
Q86VI3	Ras GTPase-activating-like protein IQGAP3	IQGAP3	1631	Q86VI3;	3ISU;	No	No	No
Q86VW0	SEC14 domain and spectrin repeat-containing protein 1 (Huntingtin-interacting protein-like protein) (Protein Solo)	SESTD1 SOLO	696	Q86VW0;	n/a	No	No	No
Q86W92	Liprin-beta-1 (Protein tyrosine phosphatase receptor type f polypeptide-interacting protein-binding protein 1) (PTPRF-interacting protein-binding protein 1) (hSGT2)	PPFIBP1 KIAA1230	1011	Q86W92;	n/a	No	No	No
Q86WI3	Protein NLRC5 (Caterpiller protein 16.1) (CLR16.1) (Nucleotide-binding oligomerization domain protein 27) (Nucleotide-binding oligomerization domain protein 4)	NLRC5 NOD27 NOD4	1866	Q86WI3;	n/a	No	No	No
Q86X02	Cerebellar degeneration-related protein 2-like (Paraneoplastic 62 kDa antigen)	CDR2L HUMPPA	465	Q86X02;	n/a	No	No	No
Q86X83	COMM domain-containing protein 2	COMMD2 HSPC042 My004	199	Q86X83;	n/a	No	No	No
Q86XE0	Sorting nexin-32 (Sorting nexin-6B)	SNX32 SNX6B	403	Q86XE0;	6E8R;	No	No	No
Q86XI2	Condensin-2 complex subunit G2 (Chromosome-associated protein G2) (CAP-G2) (hCAP-G2) (Leucine zipper protein 5) (Non-SMC condensin II complex subunit G2)	NCAPG2 LUZP5	1143	Q86XI2;	n/a	No	No	No
Q86XJ1	GAS2-like protein 3 (Growth arrest-specific protein 2-like 3)	GAS2L3	694	Q86XJ1;	n/a	No	No	No
Q86YS3	Rab11 family-interacting protein 4 (FIP4-Rab11) (Rab11-FIP4) (Arfophilin-2)	RAB11FIP4 ARFO2 KIAA1821	637	Q86YS3;	n/a	No	No	No
Q86YV0	RAS protein activator like-3	RASAL3	1011	Q86YV0;	n/a	No	No	No
Q86YV5	Inactive tyrosine-protein kinase PRAG1 (PEAK1-related kinase-activating pseudokinase 1) (Pragmin) (Sugen kinase 223) (SgK223)	PRAG1 SGK223	1406	Q86YV5;	5VE6;	No	No	No
Q8IUC4	Rhophilin-2 (76 kDa RhoB effector protein) (GTP-Rho-binding protein 2) (p76RBE)	RHPN2	686	Q8IUC4;	2VSV;	No	No	No
Q8IUC6	TIR domain-containing adapter molecule 1 (TICAM-1) (Proline-rich, vinculin and TIR domain-containing protein B) (Putative NF-kappa-B-activating protein 502H) (Toll-interleukin-1 receptor domain-containing adapter protein inducing interferon beta) (MyD88-3) (TIR domain-containing adapter protein inducing IFN-beta)	TICAM1 PRVTIRB TRIF	712	Q8IUC6;	2M1X;2M63;3RC4;4BSX;4C0M;5JEL;	No	No	No
Q8IV04	Carabin (TBC1 domain family member 10C)	TBC1D10C	446	Q8IV04;	n/a	No	No	No
Q8IV36	Protein HID1 (Down-regulated in multiple cancers 1) (HID1 domain-containing protein) (Protein hid-1 homolog)	HID1 C17orf28 DMC1	788	Q8IV36;	n/a	No	No	No
Q8IV61	Ras guanyl-releasing protein 3 (Calcium and DAG-regulated guanine nucleotide exchange factor III) (Guanine nucleotide exchange factor for Rap1)	RASGRP3 GRP3 KIAA0846	690	Q8IV61;	n/a	No	No	No
Q8IVF7	Formin-like protein 3 (Formin homology 2 domain-containing protein 3) (WW domain-binding protein 3) (WBP-3)	FMNL3 FHOD3 FRL2 KIAA2014 WBP3	1028	Q8IVF7;	n/a	No	No	No
Q8IVG5	Sterile alpha motif domain-containing protein 9-like (SAM domain-containing protein 9-like)	SAMD9L C7orf6 DRIF2 KIAA2005 UEF	1584	Q8IVG5;	n/a	No	No	No
Q8IVH2	Forkhead box protein P4 (Fork head-related protein-like A)	FOXP4 FKHLA	680	Q8IVH2;	6XAT;	No	No	No
Q8IVL5	Prolyl 3-hydroxylase 2 (EC 1.14.11.7) (Leprecan-like protein 1) (Myxoid liposarcoma-associated protein 4)	P3H2 LEPREL1 MLAT4	708	Q8IVL5;	n/a	No	No	No
Q8IVL6	Prolyl 3-hydroxylase 3 (EC 1.14.11.7) (Leprecan-like protein 2) (Protein B)	P3H3 LEPREL2	736	Q8IVL6;	n/a	No	No	No
Q8IWT3	Cullin-9 (CUL-9) (UbcH7-associated protein 1) (p53-associated parkin-like cytoplasmic protein)	CUL9 H7AP1 KIAA0708 PARC	2517	Q8IWT3;	2JUF;	No	No	No
Q8IWW8	Hydroxyacid-oxoacid transhydrogenase, mitochondrial (HOT) (EC 1.1.99.24) (Alcohol dehydrogenase iron-containing protein 1) (ADHFe1) (Fe-containing alcohol dehydrogenase)	ADHFE1 HMFT2263	467	Q8IWW8;	n/a	No	No	No
Q8IX18	Probable ATP-dependent RNA helicase DHX40 (EC 3.6.4.13) (DEAH box protein 40) (Protein PAD)	DHX40 DDX40 ARG147	779	Q8IX18;	n/a	No	No	No
Q8IX29	F-box only protein 16	FBXO16 FBX16	292	Q8IX29;	n/a	No	No	No
Q8IXK0	Polyhomeotic-like protein 2 (hPH2) (Early development regulatory protein 2)	PHC2 EDR2 PH2	858	Q8IXK0;	n/a	No	No	No
Q8IXR9	Uncharacterized protein C12orf56	C12orf56	622	Q8IXR9;	n/a	No	No	No
Q8IY21	Probable ATP-dependent RNA helicase DDX60 (EC 3.6.4.13) (DEAD box protein 60)	DDX60	1712	Q8IY21;	n/a	No	No	No
Q8IY33	MICAL-like protein 2 (Junctional Rab13-binding protein) (Molecule interacting with CasL-like 2) (MICAL-L2)	MICALL2 JRAB	904	Q8IY33;	n/a	No	No	No
Q8IYE0	Coiled-coil domain-containing protein 146	CCDC146 KIAA1505	955	Q8IYE0;	n/a	No	No	No
Q8IYN6	UBA-like domain-containing protein 2	UBALD2 FAM100B	164	Q8IYN6;	2DZL;	No	No	No
Q8IYT8	Serine/threonine-protein kinase ULK2 (EC 2.7.11.1) (Unc-51-like kinase 2)	ULK2 KIAA0623	1036	Q8IYT8;	6QAT;6QAU;6QAV;6YID;	No	No	No
Q8IZ41	Ras and EF-hand domain-containing protein (Ras-related protein Rab-45)	RASEF RAB45	740	Q8IZ41;	2P5S;2PMY;	No	No	No
Q8N103	T-cell activation Rho GTPase-activating protein (T-cell activation GTPase-activating protein)	TAGAP TAGAP1 FKSG15	731	Q8N103;	n/a	No	No	No
Q8N129	Protein canopy homolog 4	CNPY4 PSEC0237 UNQ1909/PRO4354	248	Q8N129;	n/a	No	No	No
Q8N1L9	Basic leucine zipper transcriptional factor ATF-like 2 (B-ATF-2) (Suppressor of AP-1 regulated by IFN) (SARI)	BATF2	274	Q8N1L9;	n/a	No	No	No
Q8N2N9	Ankyrin repeat domain-containing protein 36B (CLL-associated antigen KW-1)	ANKRD36B	1353	Q8N2N9;	n/a	No	No	No
Q8N392	Rho GTPase-activating protein 18 (MacGAP) (Rho-type GTPase-activating protein 18)	ARHGAP18	663	Q8N392;	n/a	No	No	No
Q8N3A8	Protein mono-ADP-ribosyltransferase PARP8 (EC 2.4.2.-) (ADP-ribosyltransferase diphtheria toxin-like 16) (ARTD16) (Poly [ADP-ribose] polymerase 8) (PARP-8)	PARP8	854	Q8N3A8;	n/a	No	No	No
Q8N3C7	CAP-Gly domain-containing linker protein 4 (Restin-like protein 2)	CLIP4 RSNL2	705	Q8N3C7;	2Z0W;	No	No	No
Q8N3D4	EH domain-binding protein 1-like protein 1	EHBP1L1	1523	Q8N3D4;	n/a	No	No	No
Q8N461	F-box/LRR-repeat protein 16 (F-box and leucine-rich repeat protein 16)	FBXL16 C16orf22 FBL16	479	Q8N461;	n/a	No	No	No
Q8N4C6	Ninein (hNinein) (Glycogen synthase kinase 3 beta-interacting protein) (GSK3B-interacting protein)	NIN KIAA1565	2090	Q8N4C6;	n/a	No	No	No
Q8N4C7	Syntaxin-19	STX19	294	Q8N4C7;	n/a	No	No	No
Q8N556	Actin filament-associated protein 1 (110 kDa actin filament-associated protein) (AFAP-110)	AFAP1 AFAP	730	Q8N556;	n/a	No	No	No
Q8N565	Melanoregulin (Dilute suppressor protein homolog)	MREG DSU HDCGA21P	214	Q8N565;	n/a	No	No	No
Q8N584	Tetratricopeptide repeat protein 39C (TPR repeat protein 39C)	TTC39C C18orf17	583	Q8N584;	n/a	No	No	No
Q8N5H7	SH2 domain-containing protein 3C (Cas/HEF1-associated signal transducer) (Chat-H) (Novel SH2-containing protein 3) (SH2 domain-containing Eph receptor-binding protein 1) (SHEP1)	SH2D3C NSP3 UNQ272/PRO309/PRO34088	860	Q8N5H7;	3T6G;	No	No	No
Q8N5V2	Ephexin-1 (Eph-interacting exchange protein) (Neuronal guanine nucleotide exchange factor)	NGEF	710	Q8N5V2;	n/a	No	No	No
Q8N7R0	Putative homeobox protein NANOG2	NANOGP1 NANOG2	232	Q8N7R0;	n/a	No	No	No
Q8N819	Probable protein phosphatase 1N (EC 3.1.3.16)	PPM1N	430	Q8N819;	n/a	No	No	No
Q8N859	Zinc finger protein 713	ZNF713	443	Q8N859;	n/a	No	No	No
Q8N884	Cyclic GMP-AMP synthase (cGAMP synthase) (cGAS) (h-cGAS) (EC 2.7.7.86) (2'3'-cGAMP synthase) (Mab-21 domain-containing protein 1)	CGAS C6orf150 MB21D1	522	Q8N884;	4KM5;4LEV;4LEW;4MKP;4O67;4O68;4O69;5V8O;5VDO;5VDP;5VDQ;5VDR;5VDS;5VDT;5VDU;5VDV;5VDW;6CT9;6CTA;6EDB;6EDC;6LRC;6LRE;6LRI;6LRJ;6LRK;6LRL;6MJU;6MJW;6MJX;6NAO;6NFG;6NFO;6O47;6Y5D;6Y5E;7C0M;7CCQ;7CCR;	No	No	No
Q8N8A2	Serine/threonine-protein phosphatase 6 regulatory ankyrin repeat subunit B (PP6-ARS-B) (Serine/threonine-protein phosphatase 6 regulatory subunit ARS-B) (Ankyrin repeat domain-containing protein 44)	ANKRD44	993	Q8N8A2;	n/a	No	No	No
Q8N8V4	Ankyrin repeat and SAM domain-containing protein 4B (Harmonin-interacting ankyrin repeat-containing protein) (Harp)	ANKS4B HARP	417	Q8N8V4;	n/a	No	No	No
Q8N9Z0	Zinc finger protein 610	ZNF610	462	Q8N9Z0;	n/a	No	No	No
Q8NB16	Mixed lineage kinase domain-like protein (hMLKL)	MLKL	471	Q8NB16;	2MSV;4M67;4MWI;5KNJ;5KO1;6BWK;6D74;6LK5;6LK6;6O5Z;6UX8;6ZLE;6ZPR;6ZVO;6ZZ1;7JW7;7JXU;7MON;7NM2;7NM4;7NM5;	No	No	No
Q8NBT2	Kinetochore protein Spc24 (hSpc24)	SPC24 SPBC24	197	Q8NBT2;	2VE7;3IZ0;	No	No	No
Q8ND90	Paraneoplastic antigen Ma1 (37 kDa neuronal protein) (Neuron- and testis-specific protein 1)	PNMA1 MA1	353	Q8ND90;	n/a	No	No	No
Q8NDH6	Islet cell autoantigen 1-like protein (Amyotrophic lateral sclerosis 2 chromosomal region candidate gene 14 protein) (Amyotrophic lateral sclerosis 2 chromosomal region candidate gene 15 protein)	ICA1L ALS2CR14 ALS2CR15	482	Q8NDH6;	n/a	No	No	No
Q8NDP4	Zinc finger protein 439	ZNF439	499	Q8NDP4;	n/a	No	No	No
Q8NDX5	Polyhomeotic-like protein 3 (Early development regulatory protein 3) (Homolog of polyhomeotic 3) (hPH3)	PHC3 EDR3 PH3	983	Q8NDX5;	4PZN;4PZO;	No	No	No
Q8NEK5	Zinc finger protein 548	ZNF548	533	Q8NEK5;	n/a	No	No	No
Q8NF50	Dedicator of cytokinesis protein 8	DOCK8	2099	Q8NF50;	n/a	No	No	No
Q8NFH8	RalBP1-associated Eps domain-containing protein 2 (Partner of RalBP1) (RalBP1-interacting protein 2)	REPS2 POB1	660	Q8NFH8;	1IQ3;	No	No	No
Q8NFV5	Speedy protein E1 (Williams-Beuren syndrome chromosomal region 19 protein)	SPDYE1 WBSCR19	336	Q8NFV5;	n/a	No	No	No
Q8NG08	DNA helicase B (hDHB) (EC 3.6.4.12)	HELB	1087	Q8NG08;	n/a	No	No	No
Q8NG31	Kinetochore scaffold 1 (ALL1-fused gene from chromosome 15q14 protein) (AF15q14) (Bub-linking kinetochore protein) (Blinkin) (Cancer susceptibility candidate gene 5 protein) (Cancer/testis antigen 29) (CT29) (Kinetochore-null protein 1) (Protein CASC5) (Protein D40/AF15q14)	KNL1 CASC5 KIAA1570	2342	Q8NG31;	3SI5;4A1G;4NF9;4NFA;	No	No	No
Q8NHW5	60S acidic ribosomal protein P0-like (Large ribosomal subunit protein uL10-like)	RPLP0P6	317	Q8NHW5;	n/a	No	No	No
Q8NHY6	Zinc finger protein 28 homolog (Zfp-28) (Krueppel-like zinc finger factor X6)	ZFP28 KIAA1431	868	Q8NHY6;	2EM2;2EM3;2EM4;2EMJ;2EMK;2EML;2EN9;2ENH;2EOH;2EP0;2EPX;2EPZ;2YTM;	No	No	No
Q8NI08	Nuclear receptor coactivator 7 (140 kDa estrogen receptor-associated protein) (Estrogen nuclear receptor coactivator 1)	NCOA7 ERAP140 ESNA1 Nbla00052 Nbla10993	942	Q8NI08;	7OBP;	No	No	No
Q8NI29	F-box only protein 27 (F-box/G-domain protein 5)	FBXO27 FBG5 FBX27	283	Q8NI29;	n/a	No	No	No
Q8NI38	NF-kappa-B inhibitor delta (NFKB inhibitor delta) (I-kappa-B-delta) (IkB-delta) (IkappaBdelta) (IkappaBNS) (T-cell activation NFKB-like protein) (TA-NFKBH)	NFKBID IKBNS	313	Q8NI38;	n/a	No	No	No
Q8TAE6	Protein phosphatase 1 regulatory subunit 14C (Kinase-enhanced PP1 inhibitor) (PKC-potentiated PP1 inhibitory protein) (Serologically defined breast cancer antigen NY-BR-81)	PPP1R14C KEPI	165	Q8TAE6;	n/a	No	No	No
Q8TAF7	Zinc finger protein 461 (Gonadotropin-inducible ovary transcription repressor 1) (GIOT-1)	ZNF461 GIOT1	563	Q8TAF7;	n/a	No	No	No
Q8TAK6	Oligodendrocyte transcription factor 1 (Oligo1) (Class B basic helix-loop-helix protein 6) (bHLHb6) (Class E basic helix-loop-helix protein 21) (bHLHe21)	OLIG1 BHLHB6 BHLHE21	271	Q8TAK6;	n/a	No	No	No
Q8TAV3	Cytochrome P450 2W1 (EC 1.14.14.-) (CYPIIW1)	CYP2W1	490	Q8TAV3;	n/a	No	No	No
Q8TB22	Spermatogenesis-associated protein 20 (Sperm-specific protein 411) (Ssp411)	SPATA20	786	Q8TB22;	n/a	No	No	No
Q8TB24	Ras and Rab interactor 3 (Ras interaction/interference protein 3)	RIN3	985	Q8TB24;	3U23;4WCI;	No	No	No
Q8TB45	DEP domain-containing mTOR-interacting protein (DEP domain-containing protein 6)	DEPTOR DEPDC6	409	Q8TB45;	7DKL;7OWG;7PE7;7PE8;7PE9;7PEA;7PEB;7PEC;7PED;	No	No	No
Q8TBC5	Zinc finger and SCAN domain-containing protein 18 (Zinc finger protein 447)	ZSCAN18 ZNF447	510	Q8TBC5;	n/a	No	No	No
Q8TBF8	Protein FAM81A	FAM81A	368	Q8TBF8;	n/a	No	No	No
Q8TBP0	TBC1 domain family member 16	TBC1D16	767	Q8TBP0;	n/a	No	No	No
Q8TCX5	Rhophilin-1 (GTP-Rho-binding protein 1)	RHPN1 KIAA1929	670	Q8TCX5;	n/a	No	No	No
Q8TDN4	CDK5 and ABL1 enzyme substrate 1 (Interactor with CDK3 1) (Ik3-1)	CABLES1 CABLES	633	Q8TDN4;	n/a	No	No	No
Q8TDW5	Synaptotagmin-like protein 5	SYTL5 SLP5	730	Q8TDW5;	n/a	No	No	No
Q8TDZ2	[F-actin]-monooxygenase MICAL1 (EC 1.14.13.225) (EC 1.6.3.1) (Molecule interacting with CasL protein 1) (MICAL-1) (NEDD9-interacting protein with calponin homology and LIM domains)	MICAL1 MICAL NICAL	1067	Q8TDZ2;	1WYL;2CO8;2DK9;5LE0;5LPN;6KU0;	No	No	No
Q8TE67	Epidermal growth factor receptor kinase substrate 8-like protein 3 (EPS8-like protein 3) (Epidermal growth factor receptor pathway substrate 8-related protein 3) (EPS8-related protein 3)	EPS8L3 EPS8R3	593	Q8TE67;	1WXT;	No	No	No
Q8TE68	Epidermal growth factor receptor kinase substrate 8-like protein 1 (EPS8-like protein 1) (Epidermal growth factor receptor pathway substrate 8-related protein 1) (EPS8-related protein 1)	EPS8L1 DRC3 EPS8R1 PP10566	723	Q8TE68;	2K2M;2ROL;	No	No	No
Q8TE77	Protein phosphatase Slingshot homolog 3 (EC 3.1.3.16) (EC 3.1.3.48) (SSH-like protein 3) (SSH-3L) (hSSH-3L)	SSH3 SSH3L	659	Q8TE77;	n/a	No	No	No
Q8TE96	ATP-dependent RNA helicase DQX1 (EC 3.6.4.12) (DEAQ box polypeptide 1)	DQX1	717	Q8TE96;	n/a	No	No	No
Q8TER5	Rho guanine nucleotide exchange factor 40 (Protein SOLO)	ARHGEF40 SOLO	1519	Q8TER5;	n/a	No	No	No
Q8TF42	Ubiquitin-associated and SH3 domain-containing protein B (EC 3.1.3.48) (Cbl-interacting protein p70) (Suppressor of T-cell receptor signaling 1) (STS-1) (T-cell ubiquitin ligand 2) (TULA-2) (Tyrosine-protein phosphatase STS1/TULA2)	UBASH3B KIAA1959 STS1	649	Q8TF42;	2CPW;2E5K;5VR6;5W5G;	No	No	No
Q8TF47	Zinc finger protein 90 homolog (Zfp-90) (Zinc finger protein 756)	ZFP90 KIAA1954 ZNF756	636	Q8TF47;	n/a	No	No	No
Q8TF65	PDZ domain-containing protein GIPC2	GIPC2	315	Q8TF65;	3GGE;	No	No	No
Q8TF72	Protein Shroom3 (Shroom-related protein) (hShrmL)	SHROOM3 KIAA1481 SHRML MSTP013	1996	Q8TF72;	6FBB;6FCP;	No	No	No
Q8WU39	Marginal zone B- and B1-cell-specific protein (Mesenteric estrogen-dependent adipose 7) (MEDA-7) (Plasma cell-induced resident endoplasmic reticulum protein) (Plasma cell-induced resident ER protein) (pERp1) (Proapoptotic caspase adapter protein)	MZB1 MEDA7 PACAP HSPC190	189	Q8WU39;	7AAH;	No	No	No
Q8WUF5	RelA-associated inhibitor (Inhibitor of ASPP protein) (Protein iASPP) (NFkB-interacting protein 1) (PPP1R13B-like protein)	PPP1R13L IASPP NKIP1 PPP1R13BL RAI	828	Q8WUF5;	2VGE;6DCX;6HL6;6RZ3;	No	No	No
Q8WUY9	DEP domain-containing protein 1B (HBV X-transactivated gene 8 protein) (HBV XAg-transactivated protein 8)	DEPDC1B XTP8	529	Q8WUY9;	n/a	No	No	No
Q8WVM7	Cohesin subunit SA-1 (SCC3 homolog 1) (Stromal antigen 1)	STAG1 SA1 SCC3	1258	Q8WVM7;	5QSM;5QSN;5QSO;5QSP;5QSQ;5QSR;5QSS;5QST;5QSU;5QSV;5QSW;5QSX;5QSY;5QSZ;6QB5;6R7O;6RRC;6RRK;6WG3;	No	No	No
Q8WVP5	Tumor necrosis factor alpha-induced protein 8-like protein 1 (TIPE1) (TNF alpha-induced protein 8-like protein 1) (TNFAIP8-like protein 1) (Oxidative stress-regulated gene-beta) (Oxy-beta)	TNFAIP8L1	186	Q8WVP5;	n/a	No	No	No
Q8WVV4	Protein POF1B (Premature ovarian failure protein 1B)	POF1B	589	Q8WVV4;	3BH9;	No	No	No
Q8WW22	DnaJ homolog subfamily A member 4	DNAJA4	397	Q8WW22;	n/a	No	No	No
Q8WWI1	LIM domain only protein 7 (LMO-7) (F-box only protein 20) (LOMP)	LMO7 FBX20 FBXO20 KIAA0858	1683	Q8WWI1;	2EAQ;	No	No	No
Q8WWM9	Cytoglobin (Histoglobin) (HGb) (Stellate cell activation-associated protein)	CYGB STAP	190	Q8WWM9;	1UMO;1URV;1URY;1UT0;1UX9;1V5H;2DC3;3AG0;4B3W;	No	No	No
Q8WWZ3	Ectodysplasin-A receptor-associated adapter protein (EDAR-associated death domain protein) (Protein crinkled homolog)	EDARADD	215	Q8WWZ3;	n/a	No	No	No
Q8WX94	NACHT, LRR and PYD domains-containing protein 7 (Nucleotide-binding oligomerization domain protein 12) (PYRIN-containing APAF1-like protein 3)	NLRP7 NALP7 NOD12 PYPAF3	980	Q8WX94;	2KM6;	No	No	No
Q8WXB4	Zinc finger protein 606 (Zinc finger protein 328)	ZNF606 KIAA1852 ZNF328	792	Q8WXB4;	n/a	No	No	No
Q8WXG8	Protein S100-Z (S100 calcium-binding protein Z)	S100Z	99	Q8WXG8;	5HYD;	No	No	No
Q8WYA1	Basic helix-loop-helix ARNT-like protein 2 (Aryl hydrocarbon receptor nuclear translocator-like protein 2) (Basic-helix-loop-helix-PAS protein MOP9) (Brain and muscle ARNT-like 2) (CYCLE-like factor) (CLIF) (Class E basic helix-loop-helix protein 6) (bHLHe6) (Member of PAS protein 9) (PAS domain-containing protein 9)	BMAL2 ARNTL2 BHLHE6 CLIF MOP9 PASD9	636	Q8WYA1;	2KDK;	No	No	No
Q8WYA6	Beta-catenin-like protein 1 (Nuclear-associated protein) (NAP) (Testis development protein NYD-SP19)	CTNNBL1 C20orf33 PP8304	563	Q8WYA6;	4CB8;4CB9;4CBA;4HM9;4HNM;4MFU;4MFV;7ABI;	No	No	No
Q8WYB5	Histone acetyltransferase KAT6B (EC 2.3.1.48) (Histone acetyltransferase MOZ2) (MOZ, YBF2/SAS3, SAS2 and TIP60 protein 4) (MYST-4) (Monocytic leukemia zinc finger protein-related factor)	KAT6B KIAA0383 MORF MOZ2 MYST4	2073	Q8WYB5;	5U2J;6OIE;	No	No	No
Q8WYP3	Ras and Rab interactor 2 (Ras association domain family 4) (Ras inhibitor JC265) (Ras interaction/interference protein 2)	RIN2 RASSF4	895	Q8WYP3;	n/a	No	No	No
Q8WZ60	Kelch-like protein 6	KLHL6	621	Q8WZ60;	n/a	No	No	No
Q8WZ64	Arf-GAP with Rho-GAP domain, ANK repeat and PH domain-containing protein 2 (Centaurin-delta-1) (Cnt-d1) (Protein PARX)	ARAP2 CENTD1 KIAA0580	1704	Q8WZ64;	1X40;2COD;	No	No	No
Q92502	StAR-related lipid transfer protein 8 (Deleted in liver cancer 3 protein) (DLC-3) (START domain-containing protein 8) (StARD8) (START-GAP3)	STARD8 DLC3 KIAA0189	1023	Q92502;	n/a	No	No	No
Q92556	Engulfment and cell motility protein 1 (Protein ced-12 homolog)	ELMO1 KIAA0281	727	Q92556;	2RQR;2VSZ;3A98;6JPP;6TGB;6TGC;7DPA;	No	No	No
Q92563	Testican-2 (SPARC/osteonectin, CWCV, and Kazal-like domains proteoglycan 2)	SPOCK2 KIAA0275 TICN2 UNQ269/PRO306	424	Q92563;	n/a	No	No	No
Q92608	Dedicator of cytokinesis protein 2	DOCK2 KIAA0209	1830	Q92608;	2RQR;2YIN;3A98;3B13;6TGB;6TGC;	No	No	No
Q92614	Unconventional myosin-XVIIIa (Molecule associated with JAK3 N-terminus) (MAJN) (Myosin containing a PDZ domain) (Surfactant protein receptor SP-R210) (SP-R210)	MYO18A CD245 KIAA0216 MYSPDZ TIAF1	2054	Q92614;	n/a	No	No	No
Q92619	Rho GTPase-activating protein 45 [Cleaved into: Minor histocompatibility antigen HA-1 (mHag HA-1)]	ARHGAP45 HMHA1 KIAA0223	1136	Q92619;	3D25;3FT3;	No	No	No
Q92623	Tetratricopeptide repeat protein 9A (TPR repeat protein 9A)	TTC9 KIAA0227 TTC9A	222	Q92623;	n/a	No	No	No
Q92626	Peroxidasin homolog (EC 1.11.2.-) (Melanoma-associated antigen MG50) (Peroxidasin 1) (hsPxd01) (Vascular peroxidase 1) (p53-responsive gene 2 protein) [Cleaved into: PXDN active fragment]	PXDN KIAA0230 MG50 PRG2 PXD01 VPO VPO1	1479	Q92626;	n/a	No	No	No
Q92636	Protein FAN (Factor associated with neutral sphingomyelinase activation) (Factor associated with N-SMase activation)	NSMAF FAN	917	Q92636;	n/a	No	No	No
Q92748	Thyroid hormone-inducible hepatic protein (Spot 14 protein) (S14) (SPOT14)	THRSP	146	Q92748;	n/a	No	No	No
Q92754	Transcription factor AP-2 gamma (AP2-gamma) (Activating enhancer-binding protein 2 gamma) (Transcription factor ERF-1)	TFAP2C	450	Q92754;	n/a	No	No	No
Q92791	Endoplasmic reticulum protein SC65 (Leprecan-like protein 4) (Nucleolar autoantigen No55) (Prolyl 3-hydroxylase family member 4) (Synaptonemal complex protein SC65)	P3H4 LEPREL4 NOL55 SC65	437	Q92791;	n/a	No	No	No
Q92793	CREB-binding protein (Histone lysine acetyltransferase CREBBP) (EC 2.3.1.48) (Protein-lysine acetyltransferase CREBBP) (EC 2.3.1.-)	CREBBP CBP	2442	Q92793;	1JSP;1LIQ;1RDT;1WO3;1WO4;1WO5;1WO6;1WO7;1ZOQ;2D82;2KJE;2KWF;2L84;2L85;2LXS;2LXT;2N1A;2RNY;3DWY;3P1C;3P1D;3P1E;3P1F;3SVH;4A9K;4N3W;4N4F;4NR4;4NR5;4NR6;4NR7;4NYV;4NYW;4NYX;4OUF;4TQN;4TS8;4WHU;4YK0;5CGP;5DBM;5EIC;5ENG;5EP7;5GH9;5H85;5I83;5I86;5I89;5I8B;5I8G;5J0D;5JEM;5KTU;5KTW;5KTX;5LPJ;5LPL;5MME;5MMG;5MPK;5MPN;5MPZ;5MQE;5MQG;5MQK;5NLK;5NRW;5NU3;5OWK;5SVH;5TB6;5W0E;5W0F;5W0L;5W0Q;5XXH;6ALB;6ALC;6AXQ…	No	No	No
Q92817	Envoplakin (210 kDa cornified envelope precursor protein) (210 kDa paraneoplastic pemphigus antigen) (p210)	EVPL	2033	Q92817;	4QMD;	No	No	No
Q92826	Homeobox protein Hox-B13	HOXB13	284	Q92826;	2CRA;5EDN;5EEA;5EF6;5EG0;5EGO;5NO6;	No	No	No
Q92882	Osteoclast-stimulating factor 1	OSTF1	214	Q92882;	1X2K;1ZLM;3EHQ;3EHR;	No	No	No
Q92949	Forkhead box protein J1 (Forkhead-related protein FKHL13) (Hepatocyte nuclear factor 3 forkhead homolog 4) (HFH-4)	FOXJ1 FKHL13 HFH4	421	Q92949;	n/a	No	No	No
Q92973	Transportin-1 (Importin beta-2) (Karyopherin beta-2) (M9 region interaction protein) (MIP)	TNPO1 KPNB2 MIP1 TRN	898	Q92973;	1QBK;2H4M;2OT8;2QMR;2Z5J;2Z5K;2Z5M;2Z5N;2Z5O;4FDD;4FQ3;4JLQ;4OO6;5J3V;5TQC;5YVG;5YVH;5YVI;7CYL;7VPW;	No	No	No
Q92974	Rho guanine nucleotide exchange factor 2 (Guanine nucleotide exchange factor H1) (GEF-H1) (Microtubule-regulated Rho-GEF) (Proliferating cell nucleolar antigen p40)	ARHGEF2 KIAA0651 LFP40	986	Q92974;	5EFX;	No	No	No
Q92985	Interferon regulatory factor 7 (IRF-7)	IRF7	503	Q92985;	2O61;	No	No	No
Q93077	Histone H2A type 1-C (H2A-clustered histone 6) (Histone H2A/l)	H2AC6 H2AFL HIST1H2AC	130	Q93077;	6C0W;6MUO;6MUP;6UPK;6UPL;7A08;7PII;7R5R;7U46;7U47;7U4D;7YWX;7YYH;	No	No	No
Q93079	Histone H2B type 1-H (H2B-clustered histone 9) (Histone H2B.j) (H2B/j)	H2BC9 H2BFJ HIST1H2BH	126	Q93079;	n/a	No	No	No
Q969G3	SWI/SNF-related matrix-associated actin-dependent regulator of chromatin subfamily E member 1 (BRG1-associated factor 57) (BAF57)	SMARCE1 BAF57	411	Q969G3;	6LTH;6LTJ;7CYU;7VDV;	No	No	No
Q969K4	Ankyrin repeat and BTB/POZ domain-containing protein 1 (Elongation factor 1A-binding protein)	ABTB1 BPOZ PP2259	478	Q969K4;	n/a	No	No	No
Q969P5	F-box only protein 32 (Atrogin-1) (Muscle atrophy F-box protein) (MAFbx)	FBXO32	355	Q969P5;	n/a	No	No	No
Q969V6	Myocardin-related transcription factor A (MRTF-A) (MKL/myocardin-like protein 1) (Megakaryoblastic leukemia 1 protein) (Megakaryocytic acute leukemia protein)	MRTFA KIAA1438 MAL MKL1	931	Q969V6;	2KVU;2KW9;	No	No	No
Q96A32	Myosin regulatory light chain 11 (Fast skeletal myosin light chain 2) (MLC2B) (Myosin light chain 11) (Myosin regulatory light chain 2, skeletal muscle isoform)	MYL11 HSRLC MYLPF	169	Q96A32;	n/a	No	No	No
Q96AQ6	Pre-B-cell leukemia transcription factor-interacting protein 1 (Hematopoietic PBX-interacting protein)	PBXIP1 HPIP	731	Q96AQ6;	n/a	No	No	No
Q96AY2	Crossover junction endonuclease EME1 (EC 3.1.22.-) (MMS4 homolog) (hMMS4)	EME1 MMS4	570	Q96AY2;	2ZIU;2ZIV;2ZIW;2ZIX;4P0P;4P0Q;4P0R;4P0S;	No	No	No
Q96AY3	Peptidyl-prolyl cis-trans isomerase FKBP10 (PPIase FKBP10) (EC 5.2.1.8) (65 kDa FK506-binding protein) (65 kDa FKBP) (FKBP-65) (FK506-binding protein 10) (FKBP-10) (Immunophilin FKBP65) (Rotamase)	FKBP10 FKBP65 PSEC0056	582	Q96AY3;	n/a	No	No	No
Q96BD8	Spindle and kinetochore-associated protein 1	SKA1 C18orf24	255	Q96BD8;	4AJ5;4C9Y;4CA0;	No	No	No
Q96BJ8	Engulfment and cell motility protein 3	ELMO3	720	Q96BJ8;	n/a	No	No	No
Q96BS2	Calcineurin B homologous protein 3 (Tescalcin) (TSC)	TESC CHP3	214	Q96BS2;	n/a	No	No	No
Q96BX8	MOB kinase activator 3A (MOB-LAK) (Mob1 homolog 2A) (Mps one binder kinase activator-like 2A)	MOB3A MOBKL2A	217	Q96BX8;	n/a	No	No	No
Q96BY6	Dedicator of cytokinesis protein 10 (Zizimin-3)	DOCK10 KIAA0694 ZIZ3	2186	Q96BY6;	6TKY;6TKZ;6TM1;	No	No	No
Q96C90	Protein phosphatase 1 regulatory subunit 14B (Phospholipase C-beta-3 neighbouring gene protein)	PPP1R14B PLCB3N PNG	147	Q96C90;	n/a	No	No	No
Q96CF2	Charged multivesicular body protein 4c (Chromatin-modifying protein 4c) (CHMP4c) (SNF7 homolog associated with Alix 3) (SNF7-3) (hSnf7-3) (Vacuolar protein sorting-associated protein 32-3) (Vps32-3) (hVps32-3)	CHMP4C SHAX3	233	Q96CF2;	3C3R;5MK3;5V3R;5WA1;	No	No	No
Q96CS2	HAUS augmin-like complex subunit 1 (Coiled-coil domain-containing protein 5) (Enhancer of invasion-cluster) (HEI-C)	HAUS1 CCDC5 HEIC	278	Q96CS2;	n/a	No	No	No
Q96CV9	Optineurin (E3-14.7K-interacting protein) (FIP-2) (Huntingtin yeast partner L) (Huntingtin-interacting protein 7) (HIP-7) (Huntingtin-interacting protein L) (NEMO-related protein) (Optic neuropathy-inducing protein) (Transcription factor IIIA-interacting protein) (TFIIIA-IntP)	OPTN FIP2 GLC1E HIP7 HYPL NRP	577	Q96CV9;	2LO4;2LUE;3VTV;3VTW;5AAZ;5B83;5EOA;5EOF;7CZM;	No	No	No
Q96D15	Reticulocalbin-3 (EF-hand calcium-binding protein RLP49)	RCN3 UNQ239/PRO272	328	Q96D15;	n/a	No	No	No
Q96DX5	Ankyrin repeat and SOCS box protein 9 (ASB-9)	ASB9	294	Q96DX5;	3D9H;3ZKJ;3ZNG;6V9H;	No	No	No
Q96DZ5	CAP-Gly domain-containing linker protein 3 (Cytoplasmic linker protein 170-related 59 kDa protein) (CLIP-170-related 59 kDa protein) (CLIPR-59)	CLIP3 CLIPR59	547	Q96DZ5;	2CP0;	No	No	No
Q96F07	Cytoplasmic FMR1-interacting protein 2 (p53-inducible protein 121)	CYFIP2 KIAA1168 PIR121	1278	Q96F07;	n/a	No	No	No
Q96FN5	Kinesin-like protein KIF12	KIF12	646	Q96FN5;	n/a	No	No	No
Q96FQ6	Protein S100-A16 (Aging-associated gene 13 protein) (Protein S100-F) (S100 calcium-binding protein A16)	S100A16 S100F AAG13	103	Q96FQ6;	2L50;2L51;3NXA;	No	No	No
Q96G01	Protein bicaudal D homolog 1 (Bic-D 1)	BICD1	975	Q96G01;	n/a	No	No	No
Q96G42	Kelch domain-containing protein 7B	KLHDC7B	594	Q96G42;	n/a	No	No	No
Q96GE6	Calmodulin-like protein 4 (Serologically defined breast cancer antigen NY-BR-20)	CALML4	196	Q96GE6;	n/a	No	No	No
Q96H22	Centromere protein N (CENP-N) (Interphase centromere complex protein 32)	CENPN C16orf60 ICEN32 BM-309	339	Q96H22;	6BUZ;6C0W;6EQT;6MUO;6MUP;7PKN;7QOO;7R5S;7R5V;7U46;7U47;7U4D;7YWX;7YYH;	No	No	No
Q96H40	Zinc finger protein 486 (KRAB domain only protein 2)	ZNF486 KRBO2	463	Q96H40;	n/a	No	No	No
Q96H79	Zinc finger CCCH-type antiviral protein 1-like	ZC3HAV1L C7orf39	300	Q96H79;	n/a	No	No	No
Q96HE7	ERO1-like protein alpha (ERO1-L) (ERO1-L-alpha) (EC 1.8.4.-) (Endoplasmic oxidoreductin-1-like protein) (Endoplasmic reticulum oxidoreductase alpha) (Oxidoreductin-1-L-alpha)	ERO1A ERO1L UNQ434/PRO865	468	Q96HE7;	3AHQ;3AHR;	No	No	No
Q96HZ4	Transcription cofactor HES-6 (C-HAIRY1) (Class B basic helix-loop-helix protein 41) (bHLHb41) (Hairy and enhancer of split 6)	HES6 BHLHB41	224	Q96HZ4;	n/a	No	No	No
Q96IX9	Putative ankyrin repeat domain-containing protein 26-like 1 (Ankyrin repeat domain-containing protein 36B pseudogene 1)	ANKRD36BP1 ANKRD26L1	119	Q96IX9;	n/a	No	No	No
Q96JG8	Melanoma-associated antigen D4 (MAGE-D4 antigen) (MAGE-E1 antigen)	MAGED4 KIAA1859 MAGED4A MAGEE1; MAGED4B	741	Q96JG8;	n/a	No	No	No
Q96JN0	Ligand-dependent corepressor (LCoR) (Mblk1-related protein 2)	LCOR C10orf12 KIAA1795 MLR2	433	Q96JN0;	2COB;6V3X;6V3Y;	No	No	No
Q96JP2	Unconventional myosin-XVB (Myosin XVBP) (Unconventional myosin-15B)	MYO15B KIAA1783 MYO15BP	1530	Q96JP2;	2DLP;	No	No	No
Q96KE9	BTB/POZ domain-containing protein 6 (Lens BTB domain protein)	BTBD6 BDPL	538	Q96KE9;	2VKP;	No	No	No
Q96KN3	Homeobox protein PKNOX2 (Homeobox protein PREP-2) (PBX/knotted homeobox 2)	PKNOX2 PREP2	472	Q96KN3;	n/a	No	No	No
Q96L46	Calpain small subunit 2 (CSS2) (Calcium-dependent protease small subunit 2)	CAPNS2	248	Q96L46;	n/a	No	No	No
Q96LW7	Caspase recruitment domain-containing protein 19 (Bcl10-interacting CARD protein) (BinCARD)	CARD19 C9orf89	228	Q96LW7;	4DWN;4FH0;	No	No	No
Q96M96	FYVE, RhoGEF and PH domain-containing protein 4 (Actin filament-binding protein frabin) (FGD1-related F-actin-binding protein) (Zinc finger FYVE domain-containing protein 6)	FGD4 FRABP ZFYVE6	766	Q96M96;	n/a	No	No	No
Q96MT7	Cilia- and flagella-associated protein 44 (WD repeat-containing protein 52)	CFAP44 WDR52	1854	Q96MT7;	n/a	No	No	No
Q96N96	Spermatogenesis-associated protein 13 (APC-stimulated guanine nucleotide exchange factor 2) (Asef2)	SPATA13	652	Q96N96;	n/a	No	No	No
Q96NE9	FERM domain-containing protein 6 (Willin)	FRMD6 C14orf31	622	Q96NE9;	n/a	No	No	No
Q96P20	NACHT, LRR and PYD domains-containing protein 3 (Angiotensin/vasopressin receptor AII/AVP-like) (Caterpiller protein 1.1) (CLR1.1) (Cold-induced autoinflammatory syndrome 1 protein) (Cryopyrin) (PYRIN-containing APAF1-like protein 1)	NLRP3 C1orf7 CIAS1 NALP3 PYPAF1	1036	Q96P20;	2NAQ;3QF2;6NPY;7ALV;7PZC;7PZD;7VTP;7ZGU;	No	No	No
Q96PE2	Rho guanine nucleotide exchange factor 17 (164 kDa Rho-specific guanine-nucleotide exchange factor) (p164-RhoGEF) (p164RhoGEF) (Tumor endothelial marker 4)	ARHGEF17 KIAA0337 TEM4	2063	Q96PE2;	n/a	No	No	No
Q96PL1	Secretoglobin family 3A member 2 (Pneumo secretory protein 1) (PnSP-1) (Uteroglobin-related protein 1)	SCGB3A2 PNSP1 UGRP1 UNQ566/PRO1128	93	Q96PL1;	n/a	No	No	No
Q96PN7	Transcriptional-regulating factor 1 (Breast cancer anti-estrogen resistance 2) (Transcriptional-regulating protein 132) (Zinc finger protein rapa) (Zinc finger transcription factor TReP-132)	TRERF1 BCAR2 RAPA TREP132	1200	Q96PN7;	n/a	No	No	No
Q96PP8	Guanylate-binding protein 5 (EC 3.6.5.-) (GBP-TA antigen) (GTP-binding protein 5) (GBP-5) (Guanine nucleotide-binding protein 5)	GBP5 UNQ2427/PRO4987	586	Q96PP8;	7CKF;7E59;7E5A;	No	No	No
Q96PP9	Guanylate-binding protein 4 (EC 3.6.5.-) (GTP-binding protein 4) (GBP-4) (Guanine nucleotide-binding protein 4)	GBP4	640	Q96PP9;	n/a	No	No	No
Q96PX9	Pleckstrin homology domain-containing family G member 4B (PH domain-containing family G member 4B)	PLEKHG4B KIAA1909	1271	Q96PX9;	n/a	No	No	No
Q96Q89	Kinesin-like protein KIF20B (Cancer/testis antigen 90) (CT90) (Kinesin family member 20B) (Kinesin-related motor interacting with PIN1) (M-phase phosphoprotein 1) (MPP1)	KIF20B KRMP1 MPHOSPH1	1820	Q96Q89;	n/a	No	No	No
Q96QF0	Rab-3A-interacting protein (Rab3A-interacting protein) (Rabin-3) (SSX2-interacting protein)	RAB3IP RABIN8	476	Q96QF0;	4LHX;4LHY;4LHZ;4UJ3;4UJ4;4UJ5;6F6P;	No	No	No
Q96QK1	Vacuolar protein sorting-associated protein 35 (hVPS35) (Maternal-embryonic 3) (Vesicle protein sorting 35)	VPS35 MEM3 TCCCTA00141	796	Q96QK1;	2R17;5F0J;5F0K;5F0L;5F0M;5F0P;5OSH;5OSI;7BLN;7BLO;	No	No	No
Q96QP1	Alpha-protein kinase 1 (EC 2.7.11.1) (Chromosome 4 kinase) (Lymphocyte alpha-protein kinase)	ALPK1 KIAA1527 LAK	1244	Q96QP1;	5Z2C;	No	No	No
Q96R06	Sperm-associated antigen 5 (Astrin) (Deepest) (Mitotic spindle-associated protein p126) (MAP126)	SPAG5	1193	Q96R06;	n/a	No	No	No
Q96RE7	Nucleus accumbens-associated protein 1 (NAC-1) (BTB/POZ domain-containing protein 14B)	NACC1 BTBD14B NAC1	527	Q96RE7;	3GA1;4U2N;7BV9;	No	No	No
Q96RE9	Zinc finger protein 300	ZNF300	604	Q96RE9;	n/a	No	No	No
Q96RU3	Formin-binding protein 1 (Formin-binding protein 17) (hFBP17)	FNBP1 FBP17 KIAA0554	617	Q96RU3;	2EFL;	No	No	No
Q96RY5	Protein cramped-like (Cramped chromatin regulator homolog 1) (Hematological and neurological expressed 1-like protein)	CRAMP1 C16orf34 CRAMP1L HN1L KIAA1426	1269	Q96RY5;	n/a	No	No	No
Q96SC8	Doublesex- and mab-3-related transcription factor A2 (Doublesex- and mab-3-related transcription factor 5)	DMRTA2 DMRT5	542	Q96SC8;	n/a	No	No	No
Q96SQ9	Cytochrome P450 2S1 (EC 1.14.14.-) (CYPIIS1) (Hydroperoxy icosatetraenoate dehydratase) (EC 4.2.1.152) (Thromboxane-A synthase) (EC 5.3.99.5)	CYP2S1 UNQ891/PRO1906	504	Q96SQ9;	n/a	No	No	No
Q96SR6	Zinc finger protein 382 (KRAB/zinc finger suppressor protein 1) (KS1) (Multiple zinc finger and krueppel-associated box protein KS1)	ZNF382	550	Q96SR6;	n/a	No	No	No
Q96SZ4	Zinc finger and SCAN domain-containing protein 10 (Zinc finger protein 206)	ZSCAN10 ZNF206	725	Q96SZ4;	n/a	No	No	No
Q99081	Transcription factor 12 (TCF-12) (Class B basic helix-loop-helix protein 20) (bHLHb20) (DNA-binding protein HTF4) (E-box-binding protein) (Transcription factor HTF-4)	TCF12 BHLHB20 HEB HTF4	682	Q99081;	2KNH;4JOL;	No	No	No
Q99417	c-Myc-binding protein (Associate of Myc 1) (AMY-1)	MYCBP AMY1	103	Q99417;	2YY0;	No	No	No
Q99439	Calponin-2 (Calponin H2, smooth muscle) (Neutral calponin)	CNN2	309	Q99439;	1WYN;	No	No	No
Q99460	26S proteasome non-ATPase regulatory subunit 1 (26S proteasome regulatory subunit RPN2) (26S proteasome regulatory subunit S1) (26S proteasome subunit p112)	PSMD1	953	Q99460;	5GJQ;5GJR;5L4K;5LN3;5M32;5T0C;5T0G;5T0H;5T0I;5T0J;5V1Y;5V1Z;5VFP;5VFQ;5VFR;5VFS;5VFT;5VFU;5VGZ;5VHF;5VHH;5VHI;5VHS;6CO4;6MSB;6MSD;6MSE;6MSG;6MSH;6MSJ;6MSK;6OI4;6UYI;6UYJ;6WJD;6WJN;7W37;7W38;7W39;7W3A;7W3B;7W3C;7W3F;7W3G;7W3H;7W3I;7W3J;7W3K;7W3M;	No	No	No
Q99490	Arf-GAP with GTPase, ANK repeat and PH domain-containing protein 2 (AGAP-2) (Centaurin-gamma-1) (Cnt-g1) (GTP-binding and GTPase-activating protein 2) (GGAP2) (Phosphatidylinositol 3-kinase enhancer) (PIKE)	AGAP2 CENTG1 KIAA0167	1192	Q99490;	2BMJ;2IWR;2RLO;	No	No	No
Q99538	Legumain (EC 3.4.22.34) (Asparaginyl endopeptidase) (Protease, cysteine 1)	LGMN PRSC1	433	Q99538;	4AW9;4AWA;4AWB;4FGU;4N6N;4N6O;5LU8;5LU9;5LUA;5LUB;7O50;	No	No	No
Q99541	Perilipin-2 (Adipophilin) (Adipose differentiation-related protein) (ADRP)	PLIN2 ADFP	437	Q99541;	n/a	No	No	No
Q99542	Matrix metalloproteinase-19 (MMP-19) (EC 3.4.24.-) (Matrix metalloproteinase RASI) (Matrix metalloproteinase-18) (MMP-18)	MMP19 MMP18 RASI	508	Q99542;	n/a	No	No	No
Q99584	Protein S100-A13 (S100 calcium-binding protein A13)	S100A13	98	Q99584;	1YUR;1YUS;1YUT;1YUU;2EGD;2H2K;2K8M;2KI4;2KI6;2KOT;2L5X;2LE9;	No	No	No
Q99594	Transcriptional enhancer factor TEF-5 (DTEF-1) (TEA domain family member 3) (TEAD-3)	TEAD3 TEAD5 TEF5	435	Q99594;	5EMW;7CNL;7ZJQ;	No	No	No
Q99607	ETS-related transcription factor Elf-4 (E74-like factor 4) (Myeloid Elf-1-like factor)	ELF4 ELFR MEF	663	Q99607;	n/a	No	No	No
Q99626	Homeobox protein CDX-2 (CDX-3) (Caudal-type homeobox protein 2)	CDX2 CDX3	313	Q99626;	5LTY;6ES2;6ES3;	No	No	No
Q99627	COP9 signalosome complex subunit 8 (SGN8) (Signalosome subunit 8) (COP9 homolog) (hCOP9) (JAB1-containing signalosome subunit 8)	COPS8 CSN8	209	Q99627;	4D10;4D18;4WSN;6R6H;6R7F;6R7H;6R7I;6R7N;	No	No	No
Q99666	RANBP2-like and GRIP domain-containing protein 5/6 (Ran-binding protein 2-like 1/2) (RanBP2-like 1/2) (RanBP2L1) (RanBP2L2) (Sperm membrane protein BS-63)	RGPD5 RANBP2L1 RGP5 RGP7 RGPD7; RGPD6 RANBP2L2 RGP6	1765	Q99666;	n/a	No	No	No
Q99674	Cell growth regulator with EF hand domain protein 1 (Cell growth regulatory gene 11 protein) (Hydrophobestin)	CGREF1 CGR11	318	Q99674;	n/a	No	No	No
Q99687	Homeobox protein Meis3 (Meis1-related protein 2)	MEIS3 MRG2	375	Q99687;	n/a	No	No	No
Q99697	Pituitary homeobox 2 (ALL1-responsive protein ARP1) (Homeobox protein PITX2) (Paired-like homeodomain transcription factor 2) (RIEG bicoid-related homeobox transcription factor) (Solurshin)	PITX2 ARP1 RGS RIEG RIEG1	317	Q99697;	2L7F;2L7M;2LKX;	No	No	No
Q99741	Cell division control protein 6 homolog (CDC6-related protein) (Cdc18-related protein) (HsCdc18) (p62(cdc6)) (HsCDC6)	CDC6 CDC18L	560	Q99741;	2CCH;2CCI;4I5L;4I5N;	No	No	No
Q99742	Neuronal PAS domain-containing protein 1 (Neuronal PAS1) (Basic-helix-loop-helix-PAS protein MOP5) (Class E basic helix-loop-helix protein 11) (bHLHe11) (Member of PAS protein 5) (PAS domain-containing protein 5)	NPAS1 BHLHE11 MOP5 PASD5	590	Q99742;	n/a	No	No	No
Q99811	Paired mesoderm homeobox protein 2 (Paired-related homeobox protein 2) (PRX-2)	PRRX2 PMX2 PRX2	253	Q99811;	n/a	No	No	No
Q99836	Myeloid differentiation primary response protein MyD88	MYD88	296	Q99836;	2JS7;2Z5V;3MOP;4DOM;4EO7;6I3N;7BEQ;7BER;7L6W;	No	No	No
Q99929	Achaete-scute homolog 2 (ASH-2) (hASH2) (Class A basic helix-loop-helix protein 45) (bHLHa45) (Mash2)	ASCL2 BHLHA45 HASH2	193	Q99929;	n/a	No	No	No
Q99973	Telomerase protein component 1 (Telomerase-associated protein 1) (Telomerase protein 1) (p240) (p80 telomerase homolog)	TEP1 TLP1 TP1	2627	Q99973;	n/a	No	No	No
Q9BPX3	Condensin complex subunit 3 (Chromosome-associated protein G) (Condensin subunit CAP-G) (hCAP-G) (Melanoma antigen NY-MEL-3) (Non-SMC condensin I complex subunit G) (XCAP-G homolog)	NCAPG CAPG NYMEL3	1015	Q9BPX3;	6IGX;	No	No	No
Q9BPX5	Actin-related protein 2/3 complex subunit 5-like protein (Arp2/3 complex 16 kDa subunit 2) (ARC16-2)	ARPC5L	153	Q9BPX5;	6YW6;	No	No	No
Q9BPY8	Homeodomain-only protein (Lung cancer-associated Y protein) (Not expressed in choriocarcinoma protein 1) (Odd homeobox protein 1)	HOPX HOD HOP LAGY NECC1 OB1	73	Q9BPY8;	n/a	No	No	No
Q9BQI0	Allograft inflammatory factor 1-like (Ionized calcium-binding adapter molecule 2)	AIF1L C9orf58 IBA2 UNQ672/PRO1306	150	Q9BQI0;	2JJZ;2VTG;	No	No	No
Q9BQL6	Fermitin family homolog 1 (Kindlerin) (Kindlin syndrome protein) (Kindlin-1) (Unc-112-related protein 1)	FERMT1 C20orf42 KIND1 URP1	677	Q9BQL6;	n/a	No	No	No
Q9BRG2	SH2 domain-containing protein 3A (Novel SH2-containing protein 1)	SH2D3A NSP1 UNQ175/PRO201	576	Q9BRG2;	n/a	No	No	No
Q9BRJ9	Mesoderm posterior protein 1 (Class C basic helix-loop-helix protein 5) (bHLHc5)	MESP1 BHLHC5	268	Q9BRJ9;	n/a	No	No	No
Q9BRR9	Rho GTPase-activating protein 9 (Rho-type GTPase-activating protein 9)	ARHGAP9	750	Q9BRR9;	2P0D;2P0F;2P0H;	No	No	No
Q9BRT9	DNA replication complex GINS protein SLD5 (GINS complex subunit 4) [Cleaved into: DNA replication complex GINS protein SLD5, N-terminally processed]	GINS4 SLD5	223	Q9BRT9;	2E9X;2EHO;2Q9Q;6XTX;6XTY;7PFO;7PLO;	No	No	No
Q9BRX5	DNA replication complex GINS protein PSF3 (GINS complex subunit 3)	GINS3 PSF3	216	Q9BRX5;	2E9X;2EHO;2Q9Q;6XTX;6XTY;7PFO;7PLO;	No	No	No
Q9BS16	Centromere protein K (CENP-K) (Interphase centromere complex protein 37) (Protein AF-5alpha) (p33)	CENPK ICEN37 FKSG14	269	Q9BS16;	7PB4;7PKN;7QOO;7R5S;7R5V;7YWX;7YYH;	No	No	No
Q9BSF8	BTB/POZ domain-containing protein 10 (Glucose metabolism-related protein 1)	BTBD10 GMRP1	475	Q9BSF8;	n/a	No	No	No
Q9BTM1	Histone H2A.J (H2a/j)	H2AJ H2AFJ	129	Q9BTM1;	4EDU;6K60;6KVD;	No	No	No
Q9BUY7	EF-hand calcium-binding domain-containing protein 11	EFCAB11 C14orf143	163	Q9BUY7;	n/a	No	No	No
Q9BV36	Melanophilin (Exophilin-3) (Slp homolog lacking C2 domains a) (SlaC2-a) (Synaptotagmin-like protein 2a)	MLPH SLAC2A	600	Q9BV36;	n/a	No	No	No
Q9BV94	ER degradation-enhancing alpha-mannosidase-like protein 2	EDEM2 C20orf31 C20orf49 UNQ573/PRO1135	578	Q9BV94;	n/a	No	No	No
Q9BVC3	Sister chromatid cohesion protein DCC1 (Defective in sister chromatid cohesion protein 1 homolog)	DSCC1 DCC1 UNQ9337/PRO34008	393	Q9BVC3;	n/a	No	No	No
Q9BVN2	AP-4 complex accessory subunit RUSC1 (New molecule containing SH3 at the carboxy-terminus) (Nesca) (RUN and SH3 domain-containing protein 1)	RUSC1 NESCA	902	Q9BVN2;	4GIW;	No	No	No
Q9BW19	Kinesin-like protein KIFC1 (Kinesin-like protein 2) (Kinesin-related protein HSET)	KIFC1 HSET KNSL2	673	Q9BW19;	5WDH;	No	No	No
Q9BW30	Tubulin polymerization-promoting protein family member 3 (TPPP/p20)	TPPP3 CGI-38	176	Q9BW30;	2JRF;	No	No	No
Q9BWD3	Retrotransposon Gag-like protein 8A (Mammalian retrotransposon derived protein 8A)	RTL8A CXX1B FAM127B MAR8A	113	Q9BWD3;	n/a	No	No	No
Q9BWT6	Meiotic nuclear division protein 1 homolog	MND1 GAJ	205	Q9BWT6;	n/a	No	No	No
Q9BX26	Synaptonemal complex protein 2 (SCP-2) (Synaptonemal complex lateral element protein) (hsSCP2)	SYCP2 SCP2	1530	Q9BX26;	n/a	No	No	No
Q9BX69	Caspase recruitment domain-containing protein 6	CARD6	1037	Q9BX69;	n/a	No	No	No
Q9BXL7	Caspase recruitment domain-containing protein 11 (CARD-containing MAGUK protein 1) (Carma 1)	CARD11 CARMA1	1154	Q9BXL7;	4JUP;4LWD;	No	No	No
Q9BXS6	Nucleolar and spindle-associated protein 1 (NuSAP)	NUSAP1 ANKT BM-037 PRO0310	441	Q9BXS6;	n/a	No	No	No
Q9BXW6	Oxysterol-binding protein-related protein 1 (ORP-1) (OSBP-related protein 1)	OSBPL1A ORP1 OSBP8 OSBPL1 OSBPL1B	950	Q9BXW6;	5ZM5;5ZM6;5ZM7;6IYB;6TQS;	No	No	No
Q9BXW9	Fanconi anemia group D2 protein (Protein FACD2)	FANCD2 FACD	1451	Q9BXW9;	6VAA;6VAD;6VAE;6VAF;7AY1;7KZQ;7KZR;7KZS;7KZT;7KZV;	No	No	No
Q9BXX0	EMILIN-2 (Elastin microfibril interface-located protein 2) (Elastin microfibril interfacer 2) (Protein FOAP-10)	EMILIN2	1053	Q9BXX0;	n/a	No	No	No
Q9BY66	Lysine-specific demethylase 5D (EC 1.14.11.67) (Histocompatibility Y antigen) (H-Y) (Histone demethylase JARID1D) (Jumonji/ARID domain-containing protein 1D) (Protein SmcY) ([histone H3]-trimethyl-L-lysine(4) demethylase 5D)	KDM5D HY HYA JARID1D KIAA0234 SMCY	1539	Q9BY66;	2E6R;2YQE;	No	No	No
Q9BY76	Angiopoietin-related protein 4 (Angiopoietin-like protein 4) (Hepatic fibrinogen/angiopoietin-related protein) (HFARP) [Cleaved into: ANGPTL4 N-terminal chain; ANGPTL4 C-terminal chain]	ANGPTL4 ARP4 HFARP PGAR PP1158 PSEC0166 UNQ171/PRO197	406	Q9BY76;	6EUB;6U0A;6U1U;6U73;	No	No	No
Q9BYB0	SH3 and multiple ankyrin repeat domains protein 3 (Shank3) (Proline-rich synapse-associated protein 2) (ProSAP2)	SHANK3 KIAA1650 PROSAP2 PSAP2	1731	Q9BYB0;	6CPK;7C7I;7C7J;	No	No	No
Q9BYH8	NF-kappa-B inhibitor zeta (I-kappa-B-zeta) (IkB-zeta) (IkappaBzeta) (IL-1 inducible nuclear ankyrin-repeat protein) (INAP) (Molecule possessing ankyrin repeats induced by lipopolysaccharide) (MAIL)	NFKBIZ IKBZ INAP MAIL	718	Q9BYH8;	n/a	No	No	No
Q9BYL1	Sterile alpha motif domain-containing protein 10 (SAM domain-containing protein 10)	SAMD10 C20orf136	202	Q9BYL1;	n/a	No	No	No
Q9BYV2	Tripartite motif-containing protein 54 (Muscle-specific RING finger protein) (MuRF) (Muscle-specific RING finger protein 3) (MuRF-3) (MuRF3) (RING finger protein 30)	TRIM54 MURF MURF3 RNF30	358	Q9BYV2;	3Q1D;	No	No	No
Q9BYX2	TBC1 domain family member 2A (Armus) (Prostate antigen recognized and identified by SEREX 1) (PARIS-1)	TBC1D2 PARIS1 PP8997 TBC1D2A	928	Q9BYX2;	2DHK;	No	No	No
Q9BZD4	Kinetochore protein Nuf2 (hNuf2) (hNuf2R) (hsNuf2) (Cell division cycle-associated protein 1)	NUF2 CDCA1 NUF2R	464	Q9BZD4;	2VE7;3IZ0;	No	No	No
Q9BZJ0	Crooked neck-like protein 1 (Crooked neck homolog) (hCrn)	CRNKL1 CRN CGI-201 MSTP021	848	Q9BZJ0;	5MQF;5XJC;5YZG;5Z56;5Z57;5Z58;6FF4;6FF7;6ICZ;6ID0;6ID1;6QDV;6ZYM;7A5P;7ABI;7DVQ;7W59;7W5A;7W5B;	No	No	No
Q9BZR8	Apoptosis facilitator Bcl-2-like protein 14 (Bcl2-L-14) (Apoptosis regulator Bcl-G)	BCL2L14 BCLG	327	Q9BZR8;	n/a	No	No	No
Q9BZX4	Ropporin-1B (Rhophilin-associated protein 1B)	ROPN1B	212	Q9BZX4;	n/a	No	No	No
Q9C000	NACHT, LRR and PYD domains-containing protein 1 (EC 3.4.-.-) (EC 3.6.4.-) (Caspase recruitment domain-containing protein 7) (Death effector filament-forming ced-4-like apoptosis protein) (Nucleotide-binding domain and caspase recruitment domain) [Cleaved into: NACHT, LRR and PYD domains-containing protein 1, C-terminus (NLRP1-CT); NACHT, LRR and PYD domains-containing protein 1, N-terminus (NLRP1…	NLRP1 CARD7 DEFCAP KIAA0926 NAC NALP1	1473	Q9C000;	1PN5;3KAT;4IFP;4IM6;5Y3S;6K7V;6X6C;6XKK;	No	No	No
Q9C009	Forkhead box protein Q1 (HNF-3/forkhead-like protein 1) (HFH-1) (Hepatocyte nuclear factor 3 forkhead homolog 1)	FOXQ1 HFH1	403	Q9C009;	n/a	No	No	No
Q9C075	Keratin, type I cytoskeletal 23 (Cytokeratin-23) (CK-23) (Keratin-23) (K23)	KRT23	422	Q9C075;	n/a	No	No	No
Q9C093	Sperm flagellar protein 2 (Protein KPL2)	SPEF2 KIAA1770 KPL2	1822	Q9C093;	n/a	No	No	No
Q9C0D5	Protein TANC1 (Tetratricopeptide repeat, ankyrin repeat and coiled-coil domain-containing protein 1)	TANC1 KIAA1728	1861	Q9C0D5;	n/a	No	No	No
Q9C0J9	Class E basic helix-loop-helix protein 41 (bHLHe41) (Class B basic helix-loop-helix protein 3) (bHLHb3) (Differentially expressed in chondrocytes protein 2) (hDEC2) (Enhancer-of-split and hairy-related protein 1) (SHARP-1)	BHLHE41 BHLHB3 DEC2 SHARP1	482	Q9C0J9;	n/a	No	No	No
Q9GZN2	Homeobox protein TGIF2 (5'-TG-3'-interacting factor 2) (TGF-beta-induced transcription factor 2) (TGFB-induced factor 2)	TGIF2	237	Q9GZN2;	n/a	No	No	No
Q9GZT5	Protein Wnt-10a	WNT10A	417	Q9GZT5;	n/a	No	No	No
Q9GZZ0	Homeobox protein Hox-D1 (Homeobox protein Hox-GG)	HOXD1 HOX4 HOX4G	328	Q9GZZ0;	n/a	No	No	No
Q9H0B3	IQ domain-containing protein N	IQCN KIAA1683	1180	Q9H0B3;	n/a	No	No	No
Q9H0D6	5'-3' exoribonuclease 2 (EC 3.1.13.-) (DHM1-like protein) (DHP protein)	XRN2	950	Q9H0D6;	n/a	No	No	No
Q9H0H5	Rac GTPase-activating protein 1 (Male germ cell RacGap) (MgcRacGAP) (Protein CYK4 homolog) (CYK4) (HsCYK-4)	RACGAP1 KIAA1478 MGCRACGAP	632	Q9H0H5;	2OVJ;3W6R;3WPQ;3WPS;4B6D;5C2J;5C2K;	No	No	No
Q9H0R5	Guanylate-binding protein 3 (EC 3.6.5.-) (GTP-binding protein 3) (GBP-3) (Guanine nucleotide-binding protein 3)	GBP3	595	Q9H0R5;	n/a	No	No	No
Q9H147	Deoxynucleotidyltransferase terminal-interacting protein 1 (Terminal deoxynucleotidyltransferase-interacting factor 1) (TdIF1) (TdT-interacting factor 1)	DNTTIP1 C20orf167 TDIF1	329	Q9H147;	2MWI;4D6K;6Z2J;6Z2K;	No	No	No
Q9H1J7	Protein Wnt-5b	WNT5B	359	Q9H1J7;	n/a	No	No	No
Q9H1K6	Talin rod domain-containing protein 1 (Mesoderm development candidate 1)	TLNRD1 MESDC1	362	Q9H1K6;	6XZ3;6XZ4;	No	No	No
Q9H201	Epsin-3 (EPS-15-interacting protein 3)	EPN3	632	Q9H201;	n/a	No	No	No
Q9H211	DNA replication factor Cdt1 (Double parked homolog) (DUP)	CDT1	546	Q9H211;	2LE8;2WVR;6QCG;	No	No	No
Q9H223	EH domain-containing protein 4 (Hepatocellular carcinoma-associated protein 10/11) (PAST homolog 4)	EHD4 HCA10 HCA11 PAST4 FKSG7	541	Q9H223;	n/a	No	No	No
Q9H239	Matrix metalloproteinase-28 (MMP-28) (EC 3.4.24.-) (Epilysin)	MMP28 MMP25 UNQ1893/PRO4339	520	Q9H239;	n/a	No	No	No
Q9H2W2	Homeobox protein MIXL1 (Homeodomain protein MIX) (hMix) (MIX1 homeobox-like protein 1) (Mix.1 homeobox-like protein)	MIXL1 MIXL	232	Q9H2W2;	n/a	No	No	No
Q9H329	Band 4.1-like protein 4B (Erythrocyte membrane protein band 4.1-like 4B) (FERM-containing protein CG1) (Protein EHM2)	EPB41L4B EHM2 LULU2	900	Q9H329;	n/a	No	No	No
Q9H334	Forkhead box protein P1 (Mac-1-regulated forkhead) (MFH)	FOXP1 HSPC215	677	Q9H334;	2KIU;	No	No	No
Q9H3D4	Tumor protein 63 (p63) (Chronic ulcerative stomatitis protein) (CUSP) (Keratinocyte transcription factor KET) (Transformation-related protein 63) (TP63) (Tumor protein p73-like) (p73L) (p40) (p51)	TP63 KET P63 P73H P73L TP73L	680	Q9H3D4;	1RG6;2NB1;2RMN;2Y9T;2Y9U;3QYM;3QYN;3US0;3US1;3US2;3ZY0;3ZY1;4A9Z;6FGN;6RU6;6RU7;6RU8;7Z71;7Z72;7Z73;7Z7E;	No	No	No
Q9H444	Charged multivesicular body protein 4b (Chromatin-modifying protein 4b) (CHMP4b) (SNF7 homolog associated with Alix 1) (SNF7-2) (hSnf7-2) (Vacuolar protein sorting-associated protein 32-2) (Vps32-2) (hVps32-2)	CHMP4B C20orf178 SHAX1	224	Q9H444;	3C3Q;3UM3;4ABM;5MK2;	No	No	No
Q9H497	Torsin-3A (ATP-dependent interferon-responsive protein) (Torsin family 3 member A)	TOR3A ADIR	397	Q9H497;	n/a	No	No	No
Q9H4M7	Pleckstrin homology domain-containing family A member 4 (PH domain-containing family A member 4) (Phosphoinositol 3-phosphate-binding protein 1) (PEPP-1)	PLEKHA4 PEPP1	779	Q9H4M7;	1UPQ;1UPR;	No	No	No
Q9H4T2	Zinc finger and SCAN domain-containing protein 16 (Zinc finger protein 392) (Zinc finger protein 435)	ZSCAN16 ZNF392 ZNF435	348	Q9H4T2;	2COT;	No	No	No
Q9H4Y5	Glutathione S-transferase omega-2 (GSTO-2) (EC 2.5.1.18) (Glutathione S-transferase omega 2-2) (GSTO 2-2) (Glutathione-dependent dehydroascorbate reductase) (EC 1.8.5.1) (Monomethylarsonic acid reductase) (MMA(V) reductase) (EC 1.20.4.2)	GSTO2	243	Q9H4Y5;	3Q18;3Q19;3QAG;	No	No	No
Q9H6I2	Transcription factor SOX-17	SOX17	414	Q9H6I2;	2YUL;4A3N;	No	No	No
Q9H773	dCTP pyrophosphatase 1 (EC 3.6.1.12) (Deoxycytidine-triphosphatase 1) (dCTPase 1) (RS21C6) (XTP3-transactivated gene A protein)	DCTPP1 XTP3TPA CDA03	170	Q9H773;	7MU5;	No	No	No
Q9H7B4	Histone-lysine N-methyltransferase SMYD3 (EC 2.1.1.354) (SET and MYND domain-containing protein 3) (Zinc finger MYND domain-containing protein 1)	SMYD3 ZMYND1 ZNFN3A1	428	Q9H7B4;	3MEK;3OXF;3OXG;3OXL;3PDN;3QWP;3RU0;5CCL;5CCM;5EX0;5EX3;5HI7;5HQ8;5V37;5XXD;5XXG;5XXJ;5YJO;6IJL;6O9O;6P6G;6P6K;6P7Z;6PAF;6YUH;6ZRB;7BJ1;7O2A;7O2B;7O2C;	No	No	No
Q9H7D0	Dedicator of cytokinesis protein 5	DOCK5	1870	Q9H7D0;	7DPA;	No	No	No
Q9H7P9	Pleckstrin homology domain-containing family G member 2 (PH domain-containing family G member 2)	PLEKHG2	1386	Q9H7P9;	n/a	No	No	No
Q9H857	5'-nucleotidase domain-containing protein 2 (EC 3.1.3.-)	NT5DC2	520	Q9H857;	n/a	No	No	No
Q9H8S9	MOB kinase activator 1A (Mob1 alpha) (Mob1A) (Mob1 homolog 1B) (Mps one binder kinase activator-like 1B)	MOB1A C2orf6 MOB4B MOBK1B MOBKL1B	216	Q9H8S9;	1PI1;4J1V;4JIZ;5BRK;5BRM;5TWF;5TWG;5TWH;5XQZ;6MCP;6MCQ;	No	No	No
Q9H8V3	Protein ECT2 (Epithelial cell-transforming sequence 2 oncogene)	ECT2	914	Q9H8V3;	3L46;4N40;6L30;	No	No	No
Q9H8Y1	Vertnin	VRTN C14orf115	702	Q9H8Y1;	n/a	No	No	No
Q9H9S0	Homeobox protein NANOG (Homeobox transcription factor Nanog) (hNanog)	NANOG	305	Q9H9S0;	2KT0;4RBO;	No	No	No
Q9HAT0	Ropporin-1A (Cancer/testis antigen 91) (CT91) (Rhophilin-associated protein 1A)	ROPN1 ROPN1A	212	Q9HAT0;	n/a	No	No	No
Q9HB09	Bcl-2-like protein 12 (Bcl2-L-12) (Bcl-2-related proline-rich protein)	BCL2L12 BPR	334	Q9HB09;	n/a	No	No	No
Q9HB58	Sp110 nuclear body protein (Interferon-induced protein 41/75) (Speckled 110 kDa) (Transcriptional coactivator Sp110)	SP110	689	Q9HB58;	n/a	No	No	No
Q9HBI0	Gamma-parvin	PARVG	331	Q9HBI0;	n/a	No	No	No
Q9HBI1	Beta-parvin (Affixin)	PARVB CGI-56	364	Q9HBI1;	4EDL;4EDM;4EDN;	No	No	No
Q9HBM1	Kinetochore protein Spc25 (hSpc25)	SPC25 SPBC25 AD024	224	Q9HBM1;	2VE7;3IZ0;	No	No	No
Q9HBZ2	Aryl hydrocarbon receptor nuclear translocator 2 (ARNT protein 2) (Class E basic helix-loop-helix protein 1) (bHLHe1)	ARNT2 BHLHE1 KIAA0307	717	Q9HBZ2;	n/a	No	No	No
Q9HCJ0	Trinucleotide repeat-containing gene 6C protein	TNRC6C KIAA1582	1690	Q9HCJ0;	2DKL;2X04;3KTP;7RUQ;	No	No	No
Q9HCL3	Zinc finger protein 14 homolog (Zfp-14) (Zinc finger protein 531)	ZFP14 KIAA1559 ZNF531	533	Q9HCL3;	n/a	No	No	No
Q9HCS4	Transcription factor 7-like 1 (HMG box transcription factor 3) (TCF-3)	TCF7L1 TCF3	588	Q9HCS4;	n/a	No	No	No
Q9HCY8	Protein S100-A14 (S100 calcium-binding protein A14) (S114)	S100A14 S100A15	104	Q9HCY8;	2M0R;	No	No	No
Q9HD33	39S ribosomal protein L47, mitochondrial (L47mt) (MRP-L47) (Mitochondrial large ribosomal subunit protein uL29m) (Nasopharyngeal carcinoma metastasis-related protein 1)	MRPL47 NCM1 CGI-204	250	Q9HD33;	3J7Y;3J9M;5OOL;5OOM;6I9R;6NU2;6NU3;6VLZ;6VMI;6ZM5;6ZM6;6ZS9;6ZSA;6ZSB;6ZSC;6ZSD;6ZSE;6ZSG;7A5F;7A5G;7A5H;7A5I;7A5J;7A5K;7L08;7L20;7O9K;7O9M;7ODR;7ODS;7ODT;7OF0;7OF2;7OF3;7OF4;7OF5;7OF6;7OF7;7OG4;7OI6;7OI7;7OI8;7OI9;7OIA;7OIB;7OIC;7OID;7OIE;7PD3;7PO4;7QH6;7QH7;7QI4;	No	No	No
Q9NPA2	Matrix metalloproteinase-25 (MMP-25) (EC 3.4.24.-) (Leukolysin) (Membrane-type matrix metalloproteinase 6) (MT-MMP 6) (MTMMP6) (Membrane-type-6 matrix metalloproteinase) (MT6-MMP) (MT6MMP)	MMP25 MMP20 MMPL1 MT6MMP	562	Q9NPA2;	n/a	No	No	No
Q9NPC8	Homeobox protein SIX2 (Sine oculis homeobox homolog 2)	SIX2	291	Q9NPC8;	n/a	No	No	No
Q9NQ66	1-phosphatidylinositol 4,5-bisphosphate phosphodiesterase beta-1 (EC 3.1.4.11) (PLC-154) (Phosphoinositide phospholipase C-beta-1) (Phospholipase C-I) (PLC-I) (Phospholipase C-beta-1) (PLC-beta-1)	PLCB1 KIAA0581	1216	Q9NQ66;	n/a	No	No	No
Q9NQB0	Transcription factor 7-like 2 (HMG box transcription factor 4) (T-cell-specific transcription factor 4) (T-cell factor 4) (TCF-4) (hTCF-4)	TCF7L2 TCF4	619	Q9NQB0;	1JDH;1JPW;2GL7;	No	No	No
Q9NQE7	Thymus-specific serine protease (EC 3.4.-.-) (Serine protease 16)	PRSS16 TSSP	514	Q9NQE7;	n/a	No	No	No
Q9NQW1	Protein transport protein Sec31B (SEC31-like protein 2) (SEC31-related protein B) (SEC31B-1)	SEC31B SEC31L2	1179	Q9NQW1;	n/a	No	No	No
Q9NQX4	Unconventional myosin-Vc	MYO5C	1742	Q9NQX4;	4L8T;4ZG4;5HMP;	No	No	No
Q9NR11	Zinc finger protein 302 (Zinc finger protein 135-like) (Zinc finger protein 140-like) (Zinc finger protein 327)	ZNF302 ZNF135L ZNF140L ZNF327	478	Q9NR11;	n/a	No	No	No
Q9NR55	Basic leucine zipper transcriptional factor ATF-like 3 (B-ATF-3) (21 kDa small nuclear factor isolated from T-cells) (Jun dimerization protein p21SNFT)	BATF3 SNFT	127	Q9NR55;	n/a	No	No	No
Q9NR81	Rho guanine nucleotide exchange factor 3 (Exchange factor found in platelets and leukemic and neuronal tissues) (XPLN)	ARHGEF3	526	Q9NR81;	n/a	No	No	No
Q9NRE2	Teashirt homolog 2 (Ovarian cancer-related protein 10-2) (OVC10-2) (Zinc finger protein 218)	TSHZ2 C20orf17 TSH2 ZNF218	1034	Q9NRE2;	n/a	No	No	No
Q9NRH2	SNF-related serine/threonine-protein kinase (EC 2.7.11.1) (SNF1-related kinase)	SNRK KIAA0096 SNFRK	765	Q9NRH2;	5YKS;	No	No	No
Q9NRI5	Disrupted in schizophrenia 1 protein	DISC1 KIAA0457	854	Q9NRI5;	5V4B;	No	No	No
Q9NRM7	Serine/threonine-protein kinase LATS2 (EC 2.7.11.1) (Kinase phosphorylated during mitosis protein) (Large tumor suppressor homolog 2) (Serine/threonine-protein kinase kpm) (Warts-like kinase)	LATS2 KPM	1088	Q9NRM7;	4ZRI;	No	No	No
Q9NRP4	Succinate dehydrogenase assembly factor 3, mitochondrial (SDH assembly factor 3) (SDHAF3)	SDHAF3 ACN9 DC11	125	Q9NRP4;	n/a	No	No	No
Q9NS28	Regulator of G-protein signaling 18 (RGS18)	RGS18 RGS13	235	Q9NS28;	2DLV;2JM5;2OWI;	No	No	No
Q9NS87	Kinesin-like protein KIF15 (Kinesin-like protein 2) (hKLP2) (Kinesin-like protein 7) (Serologically defined breast cancer antigen NY-BR-62)	KIF15 KLP2 KNSL7	1388	Q9NS87;	4BN2;6ZPH;6ZPI;7RYP;	No	No	No
Q9NSB8	Homer protein homolog 2 (Homer-2) (Cupidin)	HOMER2	354	Q9NSB8;	n/a	No	No	No
Q9NSI8	SAM domain-containing protein SAMSN-1 (Hematopoietic adaptor containing SH3 and SAM domains 1) (Nash1) (SAM domain, SH3 domain and nuclear localization signals protein 1) (SH3-SAM adaptor protein)	SAMSN1 HACS1	373	Q9NSI8;	6UZJ;	No	No	No
Q9NSV4	Protein diaphanous homolog 3 (Diaphanous-related formin-3) (DRF3) (MDia2)	DIAPH3 DIAP3	1193	Q9NSV4;	5UWP;6X2Y;	No	No	No
Q9NTJ3	Structural maintenance of chromosomes protein 4 (SMC protein 4) (SMC-4) (Chromosome-associated polypeptide C) (hCAP-C) (XCAP-C homolog)	SMC4 CAPC SMC4L1	1288	Q9NTJ3;	4U4P;	No	No	No
Q9NU02	Ankyrin repeat and EF-hand domain-containing protein 1 (Ankyrin repeat domain-containing protein 5)	ANKEF1 ANKRD5	776	Q9NU02;	n/a	No	No	No
Q9NUJ3	T-complex protein 11-like protein 1	TCP11L1	509	Q9NUJ3;	n/a	No	No	No
Q9NUQ6	SPATS2-like protein (DNA polymerase-transactivated protein 6) (Stress granule and nucleolar protein) (SGNP)	SPATS2L DNAPTP6 SP1224	558	Q9NUQ6;	n/a	No	No	No
Q9NVI1	Fanconi anemia group I protein (Protein FACI)	FANCI KIAA1794	1328	Q9NVI1;	6VAA;6VAD;6VAE;6VAF;7AY1;	No	No	No
Q9NX02	NACHT, LRR and PYD domains-containing protein 2 (Nucleotide-binding site protein 1) (PYRIN domain and NACHT domain-containing protein 1) (PYRIN-containing APAF1-like protein 2)	NLRP2 NALP2 NBS1 PAN1 PYPAF2	1062	Q9NX02;	n/a	No	No	No
Q9NXG0	Centlein (Centrosomal protein)	CNTLN C9orf101 C9orf39	1405	Q9NXG0;	n/a	No	No	No
Q9NXH3	Protein phosphatase 1 regulatory subunit 14D (Gastrointestinal and brain-specific PP1-inhibitory protein 1) (GBPI-1)	PPP1R14D GBPI	145	Q9NXH3;	n/a	No	No	No
Q9NXR1	Nuclear distribution protein nudE homolog 1 (NudE)	NDE1 NUDE	335	Q9NXR1;	7E1T;	No	No	No
Q9NXV6	CDKN2A-interacting protein (Collaborator of ARF)	CDKN2AIP CARF	580	Q9NXV6;	n/a	No	No	No
Q9NYD6	Homeobox protein Hox-C10 (Homeobox protein Hox-3I)	HOXC10 HOX3I	342	Q9NYD6;	n/a	No	No	No
Q9NZC4	ETS homologous factor (hEHF) (ETS domain-containing transcription factor) (Epithelium-specific Ets transcription factor 3) (ESE-3)	EHF ESE3 ESE3B ESEJ	300	Q9NZC4;	n/a	No	No	No
Q9NZM3	Intersectin-2 (SH3 domain-containing protein 1B) (SH3P18) (SH3P18-like WASP-associated protein)	ITSN2 KIAA1256 SH3D1B SWAP	1697	Q9NZM3;	1J3T;1UDL;1UE9;1UFF;1UHF;3GF9;3JZY;4IIO;	No	No	No
Q9NZZ3	Charged multivesicular body protein 5 (Chromatin-modifying protein 5) (SNF7 domain-containing protein 2) (Vacuolar protein sorting-associated protein 60) (Vps60) (hVps60)	CHMP5 C9orf83 SNF7DC2 CGI-34 HSPC177 PNAS-114 PNAS-2	219	Q9NZZ3;	2LXM;3ULY;3UM0;3UM1;3UM2;4TXR;	No	No	No
Q9P0K7	Ankycorbin (Ankyrin repeat and coiled-coil structure-containing protein) (Novel retinal pigment epithelial cell protein) (Retinoic acid-induced protein 14)	RAI14 KIAA1334 NORPEG	980	Q9P0K7;	n/a	No	No	No
Q9P0L1	Zinc finger protein with KRAB and SCAN domains 7 (Zinc finger protein 167) (Zinc finger protein 448) (Zinc finger protein 64)	ZKSCAN7 ZNF167 ZNF448 ZNF64	754	Q9P0L1;	n/a	No	No	No
Q9P0M6	Core histone macro-H2A.2 (Histone macroH2A2) (mH2A2)	MACROH2A2 H2AFY2	372	Q9P0M6;	2XD7;6FY5;	No	No	No
Q9P0N9	TBC1 domain family member 7 (Cell migration-inducing protein 23)	TBC1D7 TBC7 HSPC239	293	Q9P0N9;	3QWL;4Z6Y;5EJC;5ULO;7DL2;	No	No	No
Q9P0V3	SH3 domain-binding protein 4 (EH-binding protein 10) (Transferrin receptor-trafficking protein)	SH3BP4 BOG25 EHB10 TTP	963	Q9P0V3;	n/a	No	No	No
Q9P107	GEM-interacting protein (GMIP)	GMIP	970	Q9P107;	3QWE;	No	No	No
Q9P1F3	Costars family protein ABRACL (ABRA C-terminal-like protein)	ABRACL C6orf115 HSPC280 PRO2013	81	Q9P1F3;	2L2O;	No	No	No
Q9P1Y5	Calmodulin-regulated spectrin-associated protein 3 (Protein Nezha)	CAMSAP3 KIAA1543	1249	Q9P1Y5;	n/a	No	No	No
Q9P219	Protein Daple (Coiled-coil domain-containing protein 88C) (Dvl-associating protein with a high frequency of leucine residues) (hDaple) (Hook-related protein 2) (HkRP2)	CCDC88C DAPLE KIAA1509	2028	Q9P219;	n/a	No	No	No
Q9P227	Rho GTPase-activating protein 23 (Rho-type GTPase-activating protein 23)	ARHGAP23 KIAA1501	1491	Q9P227;	n/a	No	No	No
Q9P253	Vacuolar protein sorting-associated protein 18 homolog (hVPS18)	VPS18 KIAA1475	973	Q9P253;	n/a	No	No	No
Q9P2A4	ABI gene family member 3 (New molecule including SH3) (Nesh)	ABI3 NESH	366	Q9P2A4;	n/a	No	No	No
Q9P2B4	CTTNBP2 N-terminal-like protein	CTTNBP2NL KIAA1433	639	Q9P2B4;	n/a	No	No	No
Q9P2D3	HEAT repeat-containing protein 5B	HEATR5B KIAA1414 p200 p200a	2071	Q9P2D3;	n/a	No	No	No
Q9P2E3	NFX1-type zinc finger-containing protein 1	ZNFX1 KIAA1404	1918	Q9P2E3;	n/a	No	No	No
Q9P2G3	Kelch-like protein 14 (Protein interactor of Torsin-1A) (Printor) (Protein interactor of torsinA)	KLHL14 KIAA1384	628	Q9P2G3;	n/a	No	No	No
Q9P2J3	Kelch-like protein 9	KLHL9 KIAA1354	617	Q9P2J3;	n/a	No	No	No
Q9P2N7	Kelch-like protein 13 (BTB and kelch domain-containing protein 2)	KLHL13 BKLHD2 KIAA1309	655	Q9P2N7;	n/a	No	No	No
Q9UBC5	Unconventional myosin-Ia (Brush border myosin I) (BBM-I) (BBMI) (Myosin I heavy chain) (MIHC)	MYO1A MYHL	1043	Q9UBC5;	n/a	No	No	No
Q9UBD9	Cardiotrophin-like cytokine factor 1 (B-cell-stimulating factor 3) (BSF-3) (Novel neurotrophin-1) (NNT-1)	CLCF1 BSF3 CLC NNT1	225	Q9UBD9;	n/a	No	No	No
Q9UBQ5	Eukaryotic translation initiation factor 3 subunit K (eIF3k) (Eukaryotic translation initiation factor 3 subunit 12) (Muscle-specific gene M9 protein) (PLAC-24) (eIF-3 p25) (eIF-3 p28)	EIF3K EIF3S12 ARG134 HSPC029 MSTP001 PTD001	218	Q9UBQ5;	1RZ4;3J8B;3J8C;6FEC;6YBD;6ZMW;6ZON;6ZP4;6ZVJ;7A09;7QP6;7QP7;	No	No	No
Q9UBU8	Mortality factor 4-like protein 1 (MORF-related gene 15 protein) (Protein MSL3-1) (Transcription factor-like protein MRG15)	MORF4L1 MRG15 FWP006 HSPC008 HSPC061 PP368	362	Q9UBU8;	2AQL;2EFI;2F5J;2F5K;2LKM;2N1D;6AGO;6INE;7S4A;	No	No	No
Q9UBW5	Bridging integrator 2 (Breast cancer-associated protein 1)	BIN2 BRAP1	565	Q9UBW5;	4AVM;4I1Q;	No	No	No
Q9UC07	Zinc finger protein 69 (hZNF3)	ZNF69	566	Q9UC07;	n/a	No	No	No
Q9UDT6	CAP-Gly domain-containing linker protein 2 (Cytoplasmic linker protein 115) (CLIP-115) (Cytoplasmic linker protein 2) (Williams-Beuren syndrome chromosomal region 3 protein) (Williams-Beuren syndrome chromosomal region 4 protein)	CLIP2 CYLN2 KIAA0291 WBSCR3 WBSCR4 WSCR4	1046	Q9UDT6;	2CP2;2CP3;	No	No	No
Q9UDX4	SEC14-like protein 3 (Tocopherol-associated protein 2)	SEC14L3 TAP2	400	Q9UDX4;	4UYB;	No	No	No
Q9UDY8	Mucosa-associated lymphoid tissue lymphoma translocation protein 1 (EC 3.4.22.-) (MALT lymphoma-associated translocation) (Paracaspase)	MALT1 MLT	824	Q9UDY8;	2G7R;3BFO;3K0W;3UO8;3UOA;3V4O;3V55;4I1P;4I1R;6F7I;6GK2;6H4A;6YN8;6YN9;7A41;7AK0;7AK1;7PAV;7PAW;8CZO;	No	No	No
Q9UG01	Intraflagellar transport protein 172 homolog	IFT172 KIAA1179	1749	Q9UG01;	n/a	No	No	No
Q9UGI0	Ubiquitin thioesterase ZRANB1 (EC 3.4.19.12) (TRAF-binding domain-containing protein) (hTrabid) (Zinc finger Ran-binding domain-containing protein 1)	ZRANB1 TRABID	708	Q9UGI0;	3ZRH;5AF6;	No	No	No
Q9UHD9	Ubiquilin-2 (Chap1) (DSK2 homolog) (Protein linking IAP with cytoskeleton 2) (PLIC-2) (hPLIC-2) (Ubiquitin-like product Chap1/Dsk2)	UBQLN2 N4BP4 PLIC2 HRIHFB2157	624	Q9UHD9;	1J8C;2NBV;6MUN;7F7X;	No	No	No
Q9UHR4	Brain-specific angiogenesis inhibitor 1-associated protein 2-like protein 1 (BAI1-associated protein 2-like protein 1) (Insulin receptor tyrosine kinase substrate)	BAIAP2L1 IRTKS	511	Q9UHR4;	2KXC;2LNH;	No	No	No
Q9UHV5	Rap guanine nucleotide exchange factor-like 1 (Link guanine nucleotide exchange factor II) (Link GEFII)	RAPGEFL1	662	Q9UHV5;	2DHZ;	No	No	No
Q9UHV9	Prefoldin subunit 2	PFDN2 PFD2 HSPC231	154	Q9UHV9;	6NR8;6NR9;6NRB;6NRC;6NRD;	No	No	No
Q9UI36	Dachshund homolog 1 (Dach1)	DACH1 DACH	758	Q9UI36;	1L8R;	No	No	No
Q9UIA0	Cytohesin-4 (PH, SEC7 and coiled-coil domain-containing protein 4)	CYTH4 CYT4 PSCD4	394	Q9UIA0;	n/a	No	No	No
Q9UIF8	Bromodomain adjacent to zinc finger domain protein 2B (hWALp4)	BAZ2B KIAA1476	2168	Q9UIF8;	2E7O;3G0L;3Q2F;4CUP;4CUQ;4CUR;4CUS;4CUT;4CUU;4IR3;4IR4;4IR5;4IR6;4NR9;4NRA;4NRB;4NRC;4QC1;4QC3;4QF3;4RVR;4XUA;4XUB;5CQ3;5CQ4;5CQ5;5CQ6;5CQ7;5CQ8;5CQA;5CU8;5CUA;5CUB;5CUC;5CUD;5CUE;5CUG;5DYU;5DYX;5E73;5E74;5E9I;5E9K;5E9L;5E9M;5E9Y;5L8T;5L8U;5L96;5L97;5L98;5L99;5MGE;5MGF;5MGG;5OR9;5ORB;5PB7;5PB8;5PB9;5PBA;5PBB;5PBC;5PBD;5PBE;5PBF;5PBG;5PBH;5PBI;5PBJ;5PBK;5PBL;5PBM;5PBN;5PBO;5PBP;5PBQ;5PBR;5PBS;5PBT…	No	No	No
Q9UJ72	Annexin A10 (Annexin-10) (Annexin-14)	ANXA10 ANX14	324	Q9UJ72;	n/a	No	No	No
Q9UJC3	Protein Hook homolog 1 (h-hook1) (hHK1)	HOOK1	728	Q9UJC3;	n/a	No	No	No
Q9UJU2	Lymphoid enhancer-binding factor 1 (LEF-1) (T cell-specific transcription factor 1-alpha) (TCF1-alpha)	LEF1	399	Q9UJU2;	n/a	No	No	No
Q9UJU5	Forkhead box protein D3 (HNF3/FH transcription factor genesis)	FOXD3 HFH2	478	Q9UJU5;	n/a	No	No	No
Q9UKB3	DnaJ homolog subfamily C member 12 (J domain-containing protein 1)	DNAJC12 JDP1	198	Q9UKB3;	2CTQ;	No	No	No
Q9UKG1	DCC-interacting protein 13-alpha (Dip13-alpha) (Adapter protein containing PH domain, PTB domain and leucine zipper motif 1)	APPL1 APPL DIP13A KIAA1428	709	Q9UKG1;	2EJ8;2ELA;2ELB;2Q12;2Q13;2Z0N;2Z0O;5C5B;	No	No	No
Q9UKI9	POU domain, class 2, transcription factor 3 (Octamer-binding protein 11) (Oct-11) (Octamer-binding transcription factor 11) (OTF-11) (Transcription factor PLA-1) (Transcription factor Skn-1)	POU2F3 OTF11 PLA1	436	Q9UKI9;	n/a	No	No	No
Q9UKK3	Protein mono-ADP-ribosyltransferase PARP4 (EC 2.4.2.-) (193 kDa vault protein) (ADP-ribosyltransferase diphtheria toxin-like 4) (ARTD4) (PARP-related/IalphaI-related H5/proline-rich) (PH5P) (Poly [ADP-ribose] polymerase 4) (PARP-4) (Vault poly(ADP-ribose) polymerase) (VPARP)	PARP4 ADPRTL1 KIAA0177 PARPL	1724	Q9UKK3;	n/a	No	No	No
Q9UKT4	F-box only protein 5 (Early mitotic inhibitor 1)	FBXO5 EMI1 FBX5	447	Q9UKT4;	2M6N;4UI9;7QE7;	No	No	No
Q9UKW4	Guanine nucleotide exchange factor VAV3 (VAV-3)	VAV3	847	Q9UKW4;	2D86;	No	No	No
Q9UL42	Paraneoplastic antigen Ma2 (40 kDa neuronal protein) (Onconeuronal antigen Ma2) (Paraneoplastic neuronal antigen MM2)	PNMA2 KIAA0883 MA2	364	Q9UL42;	n/a	No	No	No
Q9UL46	Proteasome activator complex subunit 2 (11S regulator complex subunit beta) (REG-beta) (Activator of multicatalytic protease subunit 2) (Proteasome activator 28 subunit beta) (PA28b) (PA28beta)	PSME2	239	Q9UL46;	7DR6;7DRW;	No	No	No
Q9ULJ1	Protein BCAP (Basal body centriole-associated protein) (Outer dense fiber protein 2-like)	ODF2L BCAP KIAA1229	636	Q9ULJ1;	n/a	No	No	No
Q9ULJ6	Zinc finger MIZ domain-containing protein 1 (PIAS-like protein Zimp10) (Retinoic acid-induced protein 17)	ZMIZ1 KIAA1224 RAI17 ZIMP10	1067	Q9ULJ6;	5AIZ;	No	No	No
Q9ULL1	Pleckstrin homology domain-containing family G member 1	PLEKHG1 KIAA1209	1385	Q9ULL1;	n/a	No	No	No
Q9ULT0	Tetratricopeptide repeat protein 7A (TPR repeat protein 7A)	TTC7A KIAA1140 TTC7	858	Q9ULT0;	n/a	No	No	No
Q9ULU8	Calcium-dependent secretion activator 1 (Calcium-dependent activator protein for secretion 1) (CAPS-1)	CADPS CAPS CAPS1 KIAA1121	1353	Q9ULU8;	1WI1;	No	No	No
Q9ULV0	Unconventional myosin-Vb	MYO5B KIAA1119	1848	Q9ULV0;	4J5M;4LNZ;4LWZ;4LX0;	No	No	No
Q9ULV5	Heat shock factor protein 4 (HSF 4) (hHSF4) (Heat shock transcription factor 4) (HSTF 4)	HSF4	492	Q9ULV5;	6J6V;6J6W;	No	No	No
Q9ULV8	E3 ubiquitin-protein ligase CBL-C (EC 2.3.2.27) (RING finger protein 57) (RING-type E3 ubiquitin transferase CBL-C) (SH3-binding protein CBL-3) (SH3-binding protein CBL-C) (Signal transduction protein CBL-C)	CBLC CBL3 RNF57	474	Q9ULV8;	3OP0;3VRN;3VRO;3VRP;3VRQ;3VRR;	No	No	No
Q9ULX9	Transcription factor MafF (U-Maf) (V-maf musculoaponeurotic fibrosarcoma oncogene homolog F)	MAFF	164	Q9ULX9;	n/a	No	No	No
Q9ULZ3	Apoptosis-associated speck-like protein containing a CARD (hASC) (Caspase recruitment domain-containing protein 5) (PYD and CARD domain-containing protein) (Target of methylation-induced silencing 1)	PYCARD ASC CARD5 TMS1	195	Q9ULZ3;	1UCP;2KN6;3J63;5H8O;6K99;6KI0;6N1H;7E5B;7KEU;	No	No	No
Q9ULZ9	Matrix metalloproteinase-17 (MMP-17) (EC 3.4.24.-) (Membrane-type matrix metalloproteinase 4) (MT-MMP 4) (MTMMP4) (Membrane-type-4 matrix metalloproteinase) (MT4-MMP) (MT4MMP)	MMP17 MT4MMP	603	Q9ULZ9;	n/a	No	No	No
Q9UMQ3	Homeobox protein BarH-like 2	BARX2	279	Q9UMQ3;	n/a	No	No	No
Q9UNA1	Rho GTPase-activating protein 26 (GTPase regulator associated with focal adhesion kinase) (Oligophrenin-1-like protein) (Rho-type GTPase-activating protein 26)	ARHGAP26 GRAF KIAA0621 OPHN1L	814	Q9UNA1;	1UGV;	No	No	No
Q9UNF1	Melanoma-associated antigen D2 (11B6) (Breast cancer-associated gene 1 protein) (BCG-1) (Hepatocellular carcinoma-associated protein JCL-1) (MAGE-D2 antigen)	MAGED2 BCG1	606	Q9UNF1;	n/a	No	No	No
Q9UNH7	Sorting nexin-6 (TRAF4-associated factor 2) [Cleaved into: Sorting nexin-6, N-terminally processed]	SNX6	406	Q9UNH7;	n/a	No	No	No
Q9UNS1	Protein timeless homolog (hTIM)	TIMELESS TIM TIM1 TIMELESS1	1208	Q9UNS1;	4XHT;4XHU;4XHW;5MQI;6T9Q;6TAZ;7PFO;7PLO;	No	No	No
Q9UPN7	Serine/threonine-protein phosphatase 6 regulatory subunit 1 (SAPS domain family member 1)	PPP6R1 KIAA1115 PP6R1 SAPS1	881	Q9UPN7;	n/a	No	No	No
Q9UPR0	Inactive phospholipase C-like protein 2 (PLC-L(2)) (PLC-L2) (Phospholipase C-L2) (Phospholipase C-epsilon-2) (PLC-epsilon-2)	PLCL2 KIAA1092 PLCE2	1127	Q9UPR0;	n/a	No	No	No
Q9UPU7	TBC1 domain family member 2B	TBC1D2B KIAA1055	963	Q9UPU7;	n/a	No	No	No
Q9UPV9	Trafficking kinesin-binding protein 1 (106 kDa O-GlcNAc transferase-interacting protein) (Protein Milton)	TRAK1 KIAA1042 OIP106	953	Q9UPV9;	n/a	No	No	No
Q9UPW5	Cytosolic carboxypeptidase 1 (EC 3.4.17.-) (EC 3.4.17.24) (ATP/GTP-binding protein 1) (Nervous system nuclear protein induced by axotomy protein 1 homolog) (Protein deglutamylase CCP1)	AGTPBP1 CCP1 KIAA1035 NNA1	1226	Q9UPW5;	n/a	No	No	No
Q9UPW6	DNA-binding protein SATB2 (Special AT-rich sequence-binding protein 2)	SATB2 KIAA1034	733	Q9UPW6;	1WI3;1WIZ;2CSF;	No	No	No
Q9UPY3	Endoribonuclease Dicer (EC 3.1.26.3) (Helicase with RNase motif) (Helicase MOI)	DICER1 DICER HERNA KIAA0928	1922	Q9UPY3;	2EB1;4NGB;4NGC;4NGD;4NGF;4NGG;4NH3;4NH5;4NH6;4NHA;4WYQ;5ZAK;5ZAL;5ZAM;	No	No	No
Q9UPZ3	BLOC-2 complex member HPS5 (Alpha-integrin-binding protein 63) (Hermansky-Pudlak syndrome 5 protein) (Ruby-eye protein 2 homolog) (Ru2)	HPS5 AIBP63 KIAA1017	1129	Q9UPZ3;	n/a	No	No	No
Q9UQ84	Exonuclease 1 (hExo1) (EC 3.1.-.-) (Exonuclease I) (hExoI)	EXO1 EXOI HEX1	846	Q9UQ84;	3QE9;3QEA;3QEB;5UZV;5V04;5V05;5V06;5V07;5V08;5V09;5V0A;5V0B;5V0C;5V0D;5V0E;	No	No	No
Q9UQB8	Brain-specific angiogenesis inhibitor 1-associated protein 2 (BAI-associated protein 2) (BAI1-associated protein 2) (Protein BAP2) (Fas ligand-associated factor 3) (FLAF3) (Insulin receptor substrate p53/p58) (IRS-58) (IRSp53/58) (Insulin receptor substrate protein of 53 kDa) (IRSp53) (Insulin receptor substrate p53)	BAIAP2	552	Q9UQB8;	1WDZ;1Y2O;2YKT;3RNJ;4JS0;6BCR;6BCY;6BD1;6BD2;6BQT;6ZEG;6ZEI;	No	No	No
Q9Y248	DNA replication complex GINS protein PSF2 (GINS complex subunit 2)	GINS2 PSF2 CGI-122 DC5 HSPC037	185	Q9Y248;	2E9X;2EHO;2Q9Q;6XTX;6XTY;7PFO;7PLO;	No	No	No
Q9Y261	Hepatocyte nuclear factor 3-beta (HNF-3-beta) (HNF-3B) (Forkhead box protein A2) (Transcription factor 3B) (TCF-3B)	FOXA2 HNF3B TCF3B	457	Q9Y261;	5X07;	No	No	No
Q9Y265	RuvB-like 1 (EC 3.6.4.12) (49 kDa TATA box-binding protein-interacting protein) (49 kDa TBP-interacting protein) (54 kDa erythrocyte cytosolic protein) (ECP-54) (INO80 complex subunit H) (Nuclear matrix protein 238) (NMP 238) (Pontin 52) (TIP49a) (TIP60-associated protein 54-alpha) (TAP54-alpha)	RUVBL1 INO80H NMP238 TIP49 TIP49A	456	Q9Y265;	2C9O;2XSZ;5OAF;6FO1;6HTS;6IGM;6K0R;6QI8;6QI9;7AHO;7OLE;7P6X;	No	No	No
Q9Y2G0	Protein EFR3 homolog B	EFR3B KIAA0953	817	Q9Y2G0;	n/a	No	No	No
Q9Y2G2	Caspase recruitment domain-containing protein 8 (EC 3.4.-.-) (CARD-inhibitor of NF-kappa-B-activating ligand) (CARDINAL) (Tumor up-regulated CARD-containing antagonist of CASP9) (TUCAN) [Cleaved into: Caspase recruitment domain-containing protein 8, C-terminus (CARD8-CT); Caspase recruitment domain-containing protein 8, N-terminus (CARD8-NT)]	CARD8 DACAR KIAA0955 NDPP1	537	Q9Y2G2;	4IKM;6K9F;6XKJ;7JKQ;7JN7;	No	No	No
Q9Y2G4	Ankyrin repeat domain-containing protein 6 (Diversin)	ANKRD6 KIAA0957	727	Q9Y2G4;	n/a	No	No	No
Q9Y2K2	Serine/threonine-protein kinase SIK3 (EC 2.7.11.1) (Salt-inducible kinase 3) (SIK-3) (Serine/threonine-protein kinase QSK)	SIK3 KIAA0999 QSK L19	1321	Q9Y2K2;	n/a	No	No	No
Q9Y2K7	Lysine-specific demethylase 2A (EC 1.14.11.27) (CXXC-type zinc finger protein 8) (F-box and leucine-rich repeat protein 11) (F-box protein FBL7) (F-box protein Lilina) (F-box/LRR-repeat protein 11) (JmjC domain-containing histone demethylation protein 1A) ([Histone-H3]-lysine-36 demethylase 1A)	KDM2A CXXC8 FBL11 FBL7 FBXL11 JHDM1A KIAA1004	1162	Q9Y2K7;	2YU1;2YU2;4BBQ;6BYH;6C16;	No	No	No
Q9Y2L6	FERM domain-containing protein 4B (GRP1-binding protein GRSP1)	FRMD4B GRSP1 KIAA1013	1034	Q9Y2L6;	n/a	No	No	No
Q9Y2L9	Leucine-rich repeat and calponin homology domain-containing protein 1 (Calponin homology domain-containing protein 1) (Neuronal protein 81) (NP81)	LRCH1 CHDC1 KIAA1016	728	Q9Y2L9;	n/a	No	No	No
Q9Y2T1	Axin-2 (Axin-like protein) (Axil) (Axis inhibition protein 2) (Conductin)	AXIN2	843	Q9Y2T1;	n/a	No	No	No
Q9Y371	Endophilin-B1 (Bax-interacting factor 1) (Bif-1) (SH3 domain-containing GRB2-like protein B1)	SH3GLB1 KIAA0491 CGI-61	365	Q9Y371;	6UP6;6UPN;	No	No	No
Q9Y3L3	SH3 domain-binding protein 1	SH3BP1	701	Q9Y3L3;	4J9D;4J9F;	No	No	No
Q9Y3M9	Zinc finger protein 337	ZNF337	751	Q9Y3M9;	n/a	No	No	No
Q9Y3R5	Protein dopey-2	DOP1B C21orf5 DOPEY2 KIAA0933	2298	Q9Y3R5;	n/a	No	No	No
Q9Y3U8	60S ribosomal protein L36 (Large ribosomal subunit protein eL36)	RPL36	105	Q9Y3U8;	4UG0;4V6X;5AJ0;5LKS;5T2C;6IP5;6IP6;6IP8;6LQM;6LSR;6LSS;6LU8;6OLE;6OLF;6OLG;6OLI;6OLZ;6OM0;6OM7;6QZP;6W6L;6XA1;6Y0G;6Y2L;6Y57;6Y6X;6Z6L;6Z6M;6Z6N;6ZM7;6ZME;6ZMI;6ZMO;7BHP;7F5S;	No	No	No
Q9Y3Z3	Deoxynucleoside triphosphate triphosphohydrolase SAMHD1 (dNTPase) (EC 3.1.5.-) (Dendritic cell-derived IFNG-induced protein) (DCIP) (Monocyte protein 5) (MOP-5) (SAM domain and HD domain-containing protein 1) (hSAMHD1)	SAMHD1 MOP5	626	Q9Y3Z3;	2E8O;3U1N;4BZB;4BZC;4CC9;4MZ7;4Q7H;4QFX;4QFY;4QFZ;4QG0;4QG1;4QG2;4QG4;4RXO;4RXP;4RXQ;4RXR;4RXS;4TNP;4TNQ;4TNR;4TNX;4TNY;4TNZ;4TO0;4TO1;4TO2;4TO3;4TO4;4TO5;4TO6;4ZWE;4ZWG;5AO0;5AO1;5AO2;5AO3;5AO4;6CM2;6DW3;6DW4;6DW5;6DW7;6DWD;6DWJ;6DWK;6TX0;6TXA;6TXC;6TXE;6TXF;6U6X;6U6Y;6U6Z;6XU1;6YOM;7A5Y;7LTT;7LU5;7S2Y;7UJN;	No	No	No
Q9Y4A8	Nuclear factor erythroid 2-related factor 3 (NF-E2-related factor 3) (NFE2-related factor 3) (Nuclear factor, erythroid derived 2, like 3)	NFE2L3 NRF3	694	Q9Y4A8;	n/a	No	No	No
Q9Y4B4	Helicase ARIP4 (EC 3.6.4.12) (Androgen receptor-interacting protein 4) (RAD54-like protein 2)	RAD54L2 ARIP4 KIAA0809	1467	Q9Y4B4;	n/a	No	No	No
Q9Y4C4	Malignant fibrous histiocytoma-amplified sequence 1 (Malignant fibrous histiocytoma-amplified sequence with leucine-rich tandem repeats 1)	MFHAS1 MASL1	1052	Q9Y4C4;	n/a	No	No	No
Q9Y4F9	Rho family-interacting cell polarization regulator 2	RIPOR2 C6orf32 DIFF48 FAM65B KIAA0386 PL48	1068	Q9Y4F9;	n/a	No	No	No
Q9Y4G2	Pleckstrin homology domain-containing family M member 1 (PH domain-containing family M member 1) (162 kDa adapter protein) (AP162)	PLEKHM1 KIAA0356	1056	Q9Y4G2;	5DPR;5DPS;5DPT;5DPW;	No	No	No
Q9Y4I1	Unconventional myosin-Va (Dilute myosin heavy chain, non-muscle) (Myosin heavy chain 12) (Myosin-12) (Myoxin)	MYO5A MYH12	1855	Q9Y4I1;	4D07;4J5L;4LLI;4LX1;4LX2;5JCY;5JCZ;	No	No	No
Q9Y543	Transcription factor HES-2 (Class B basic helix-loop-helix protein 40) (bHLHb40) (Hairy and enhancer of split 2)	HES2 BHLHB40	173	Q9Y543;	n/a	No	No	No
Q9Y5J3	Hairy/enhancer-of-split related with YRPW motif protein 1 (Cardiovascular helix-loop-helix factor 2) (CHF-2) (Class B basic helix-loop-helix protein 31) (bHLHb31) (HES-related repressor protein 1) (Hairy and enhancer of split-related protein 1) (HESR-1) (Hairy-related transcription factor 1) (HRT-1) (hHRT1)	HEY1 BHLHB31 CHF2 HERP2 HESR1 HRT1	304	Q9Y5J3;	2DB7;	No	No	No
Q9Y5K8	V-type proton ATPase subunit D (V-ATPase subunit D) (V-ATPase 28 kDa accessory protein) (Vacuolar proton pump subunit D)	ATP6V1D ATP6M VATD	247	Q9Y5K8;	6WLZ;6WM2;6WM3;6WM4;7U4T;7UNF;	No	No	No
Q9Y5N6	Origin recognition complex subunit 6	ORC6 ORC6L	252	Q9Y5N6;	3M03;6KVG;	No	No	No
Q9Y5Q3	Transcription factor MafB (Maf-B) (V-maf musculoaponeurotic fibrosarcoma oncogene homolog B)	MAFB KRML	323	Q9Y5Q3;	n/a	No	No	No
Q9Y5V3	Melanoma-associated antigen D1 (MAGE tumor antigen CCF) (MAGE-D1 antigen) (Neurotrophin receptor-interacting MAGE homolog)	MAGED1 NRAGE PP2250 PRO2292	778	Q9Y5V3;	n/a	No	No	No
Q9Y5X2	Sorting nexin-8	SNX8	465	Q9Y5X2;	n/a	No	No	No
Q9Y603	Transcription factor ETV7 (ETS translocation variant 7) (ETS-related protein Tel2) (Tel-related Ets factor) (Transcription factor Tel-2)	ETV7 TEL2 TELB TREF	341	Q9Y603;	n/a	No	No	No
Q9Y616	Interleukin-1 receptor-associated kinase 3 (IRAK-3) (IL-1 receptor-associated kinase M) (IRAK-M) (Inactive IL-1 receptor-associated kinase 3)	IRAK3	596	Q9Y616;	5UKE;6RUU;6ZIW;	No	No	No
Q9Y625	Glypican-6 [Cleaved into: Secreted glypican-6]	GPC6 UNQ369/PRO705	555	Q9Y625;	n/a	No	No	No
Q9Y651	Transcription factor SOX-21 (SOX-A)	SOX21 SOX25 SOXA	276	Q9Y651;	n/a	No	No	No
Q9Y680	Peptidyl-prolyl cis-trans isomerase FKBP7 (PPIase FKBP7) (EC 5.2.1.8) (23 kDa FK506-binding protein) (23 kDa FKBP) (FKBP-23) (FK506-binding protein 7) (FKBP-7) (Rotamase)	FKBP7 FKBP23 UNQ670/PRO1304	222	Q9Y680;	n/a	No	No	No
Q9Y6A5	Transforming acidic coiled-coil-containing protein 3 (ERIC-1)	TACC3 ERIC1	838	Q9Y6A5;	5LXN;5LXO;5ODS;5ODT;	No	No	No
Q9Y6C2	EMILIN-1 (Elastin microfibril interface-located protein 1) (Elastin microfibril interfacer 1)	EMILIN1 EMI	1016	Q9Y6C2;	2KA3;2OII;	No	No	No
Q9Y6D9	Mitotic spindle assembly checkpoint protein MAD1 (Mitotic arrest deficient 1-like protein 1) (MAD1-like protein 1) (Mitotic checkpoint MAD1 protein homolog) (HsMAD1) (hMAD1) (Tax-binding protein 181)	MAD1L1 MAD1 TXBP181	718	Q9Y6D9;	1GO4;4DZO;7B1F;7B1H;7B1J;	No	No	No
Q9Y6E0	Serine/threonine-protein kinase 24 (EC 2.7.11.1) (Mammalian STE20-like protein kinase 3) (MST-3) (STE20-like kinase MST3) [Cleaved into: Serine/threonine-protein kinase 24 36 kDa subunit (Mammalian STE20-like protein kinase 3 N-terminal) (MST3/N); Serine/threonine-protein kinase 24 12 kDa subunit (Mammalian STE20-like protein kinase 3 C-terminal) (MST3/C)]	STK24 MST3 STK3	443	Q9Y6E0;	3A7F;3A7G;3A7H;3A7I;3A7J;3CKW;3CKX;3ZHP;4O27;4QML;4QMM;4QMN;4QMO;4QMP;4QMQ;4QMS;4QMT;4QMU;4QMV;4QMW;4QMX;4QMY;4QMZ;4QNA;4QO9;4U8Z;4W8D;4W8E;7B30;7B31;7B32;7B33;7B34;7B35;	No	No	No
Q9Y6F1	Protein mono-ADP-ribosyltransferase PARP3 (EC 2.4.2.-) (ADP-ribosyltransferase diphtheria toxin-like 3) (ARTD3) (DNA ADP-ribosyltransferase PARP3) (EC 2.4.2.-) (IRT1) (NAD(+) ADP-ribosyltransferase 3) (ADPRT-3) (Poly [ADP-ribose] polymerase 3) (PARP-3) (hPARP-3) (Poly[ADP-ribose] synthase 3) (pADPRT-3)	PARP3 ADPRT3 ADPRTL3	533	Q9Y6F1;	2EOC;3C49;3C4H;3CE0;3FHB;4GV0;4GV2;4GV4;4L6Z;4L70;4L7L;4L7N;4L7O;4L7P;4L7R;4L7U;	No	No	No
Q9Y6K5	2'-5'-oligoadenylate synthase 3 ((2-5')oligo(A) synthase 3) (2-5A synthase 3) (EC 2.7.7.84) (p100 OAS) (p100OAS)	OAS3 P/OKcl.4	1087	Q9Y6K5;	4S3N;	No	No	No
Q9Y6M9	NADH dehydrogenase [ubiquinone] 1 beta subcomplex subunit 9 (Complex I-B22) (CI-B22) (LYR motif-containing protein 3) (NADH-ubiquinone oxidoreductase B22 subunit)	NDUFB9 LYRM3 UQOR22	179	Q9Y6M9;	5XTC;5XTD;5XTH;5XTI;	No	No	No
Q9Y6N9	Harmonin (Antigen NY-CO-38/NY-CO-37) (Autoimmune enteropathy-related antigen AIE-75) (Protein PDZ-73) (Renal carcinoma antigen NY-REN-3) (Usher syndrome type-1C protein)	USH1C AIE75	552	Q9Y6N9;	1X5N;2KBQ;2KBR;2KBS;2LSR;3K1R;5F3X;5MV8;5MV9;5XBF;7X2E;	No	No	No
Q9Y6X3	MAU2 chromatid cohesion factor homolog (MAU-2) (Cohesin loading complex subunit SCC4 homolog)	MAU2 KIAA0892 SCC4	613	Q9Y6X3;	n/a	No	No	No
Q9Y6X8	Zinc fingers and homeoboxes protein 2 (Alpha-fetoprotein regulator 1) (AFP regulator 1) (Regulator of AFP) (Zinc finger and homeodomain protein 2)	ZHX2 AFR1 KIAA0854 RAF	837	Q9Y6X8;	2DMP;3NAU;	No	No	No
